# Supplementary material for: Isothiourea – catalyzed α-selective glycosylations
Source: Royal Society of Chemistry journal article supplement (doi:10.1039/d4cc05456c), 2025-01-01
Supplement: d4cc05456c1.pdf [file d4cc05456c1.pdf]

## **Isothiourea - Catalyzed $\alpha$ - Selective Glycosylations**

---

## Table of Contents

1. **General Information – S3**
2. **Additional Optimization Data, Bromide and Chloride Comparison, NMR, and Mass Spectrometry Study – S4-S9**
3. **Experimental Procedures – S10-S11**
4. **Experimental Data – S12-S50**
5. **NMR Spectra – S51-S138**
6. **References – S139**

---

## 1. General Information

All reactions were performed in flame dried round bottom or modified Schlenk (Kjedahl shape) flasks fitted with rubber septa or a yellow PTFE cap under a positive pressure of argon, unless otherwise indicated. Air- and moisture-sensitive liquids and solutions were transferred by syringe or canula. Dry THF, Et<sub>2</sub>O and CH<sub>2</sub>Cl<sub>2</sub> were obtained from a PureSolv MD-5 Solvent Purification System (Inert). Unless otherwise noted, all other reagents were used as obtained from commercial sources without further purification. Analytical thin-layer chromatography (TLC) was carried out using 0.2 mm commercial silica gel plates (silica gel 60, F254, Merck) and visualized using a UV lamp and/or ceric ammonium molybdate (CAM) or aqueous potassium permanganate (KMnO<sub>4</sub>) stain. Preparatory TLC was also carried out on the same silica gel plates. Organic solutions were concentrated using a Heidolph rotary evaporator at ~ 10 torr.

NMR spectra (1D and 2D experiments) were recorded on a Bruker AV-III-HD spectrometer (<sup>1</sup>H at 500 MHz and <sup>13</sup>C at 125 MHz). Chemical shifts (δ) are given in ppm with reference to residual proton signals in the solvent [<sup>1</sup>H NMR – CHCl<sub>3</sub> (7.26); <sup>13</sup>C NMR: CDCl<sub>3</sub> (77.00)]. Data are presented as follows: chemical shift, multiplicity (s = singlet, d = doublet, t = triplet, q = quartet, m = multiplet, and bs = broad singlet), integration, and coupling constant in hertz (Hz). High-resolution mass (HRMS) measurements for compound characterization were carried out using a Quan TOF analyzer or an Agilent 6550 QTOF system and are reported as m/z (relative intensity). Infrared spectra were recorded on ThermoFisher Nicolet iS50 FT IR using neat thin film technique.

## 2. Additional Optimization Data

Figure S1. Reaction Optimization

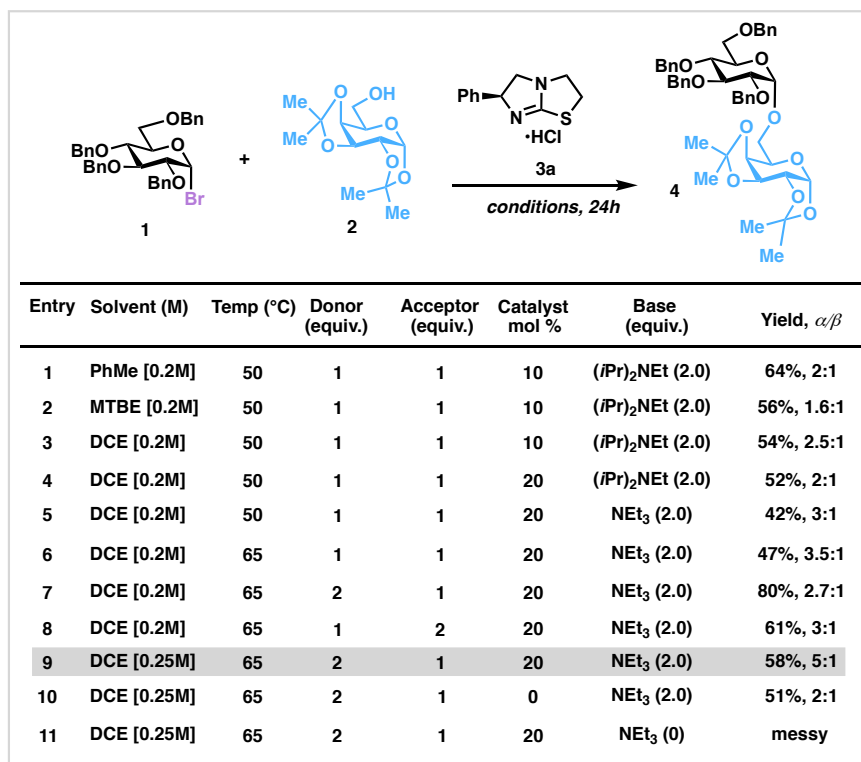

Figure S2. Catalyst Optimization

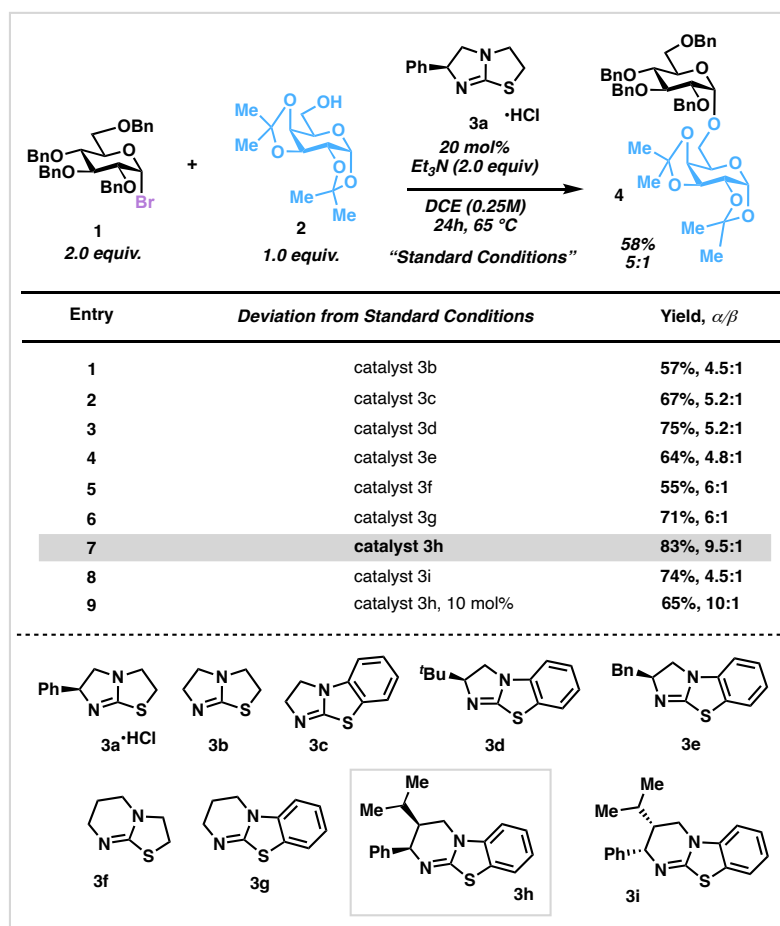

Figure S3. Bromide and Chloride Comparison

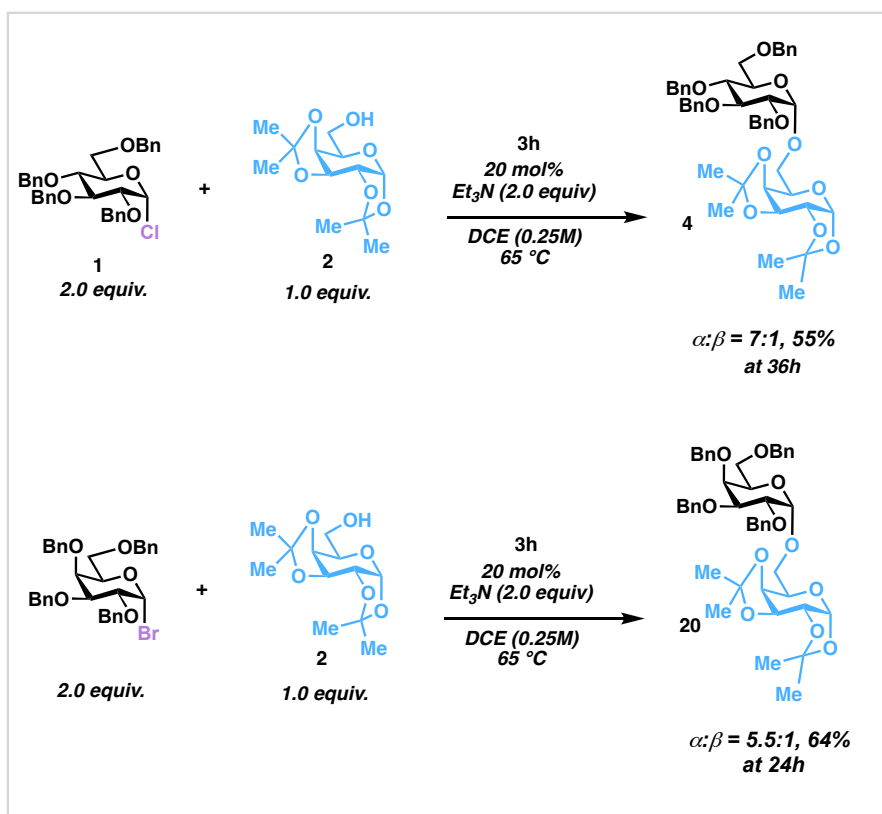

Figure S4. NMR Study

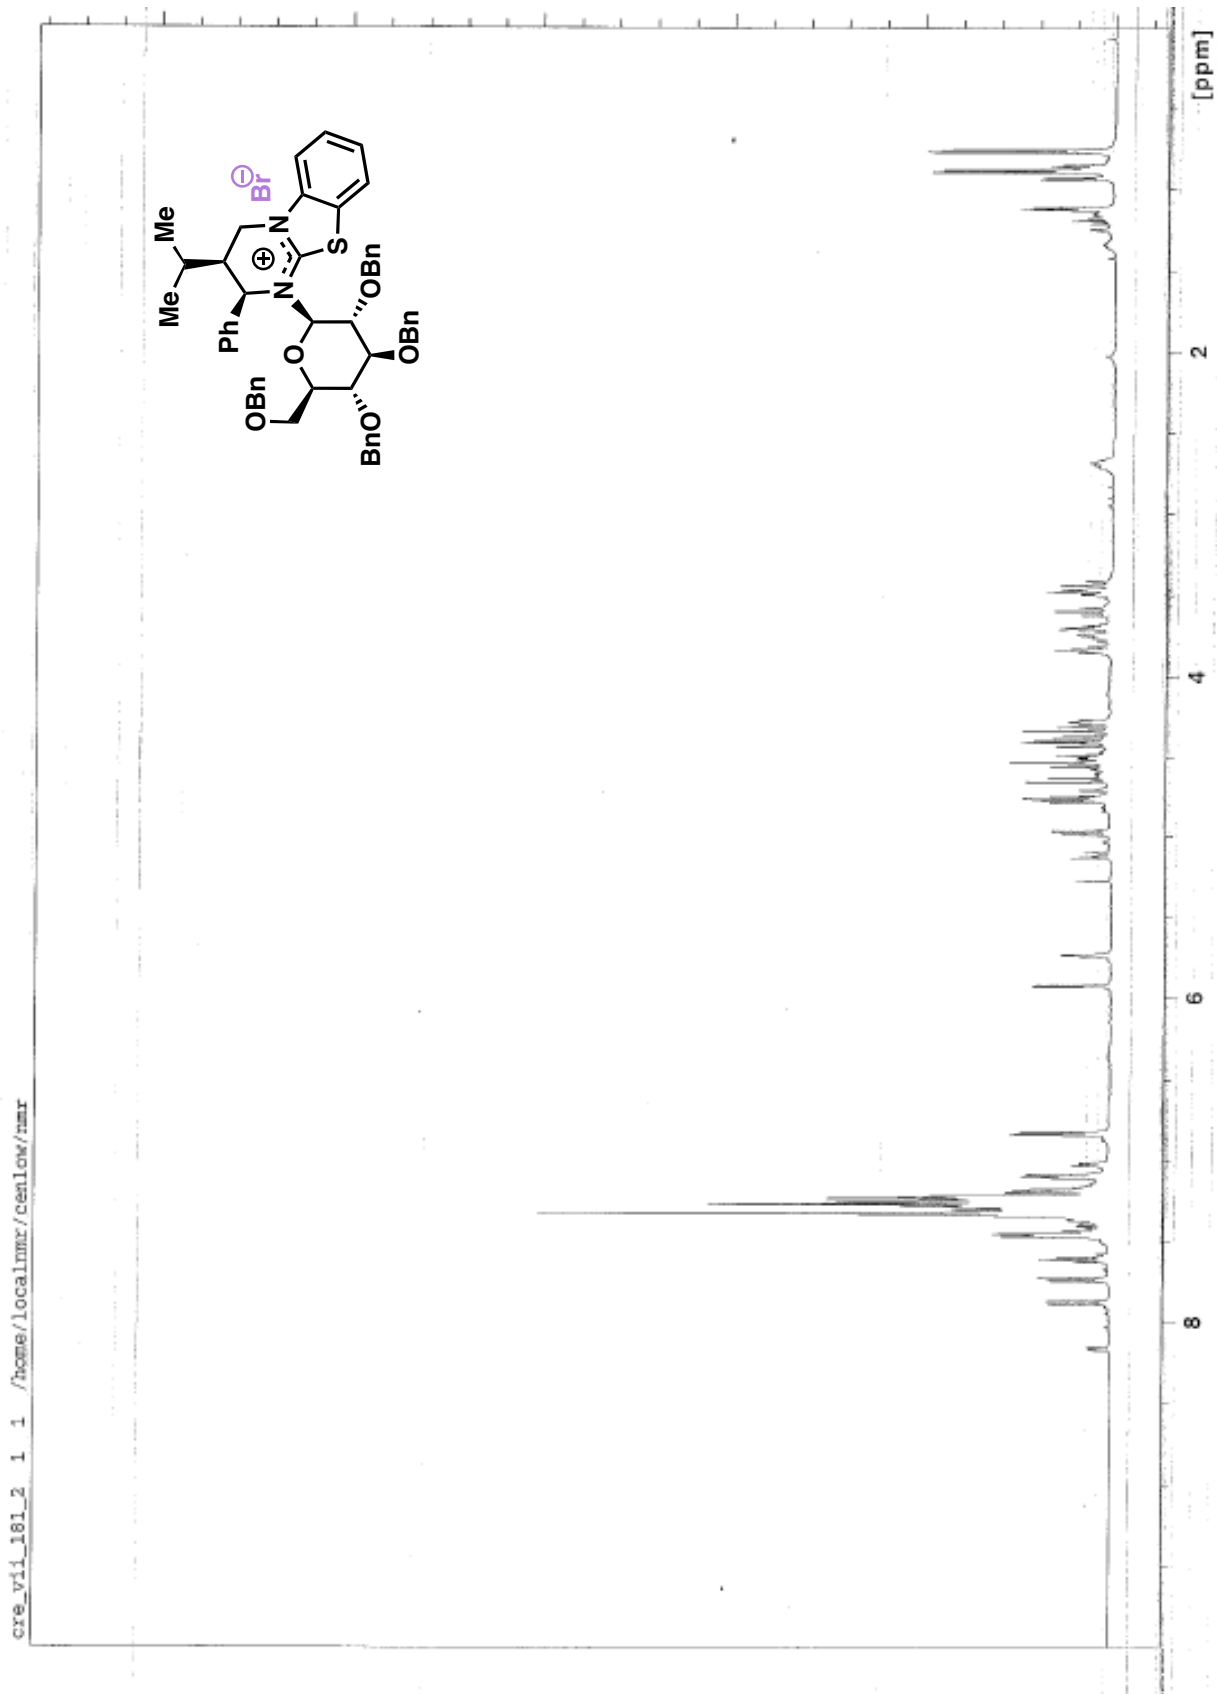

cre\_vii\_181\_2 1 1 /home/localnmr/cenlow/nmr

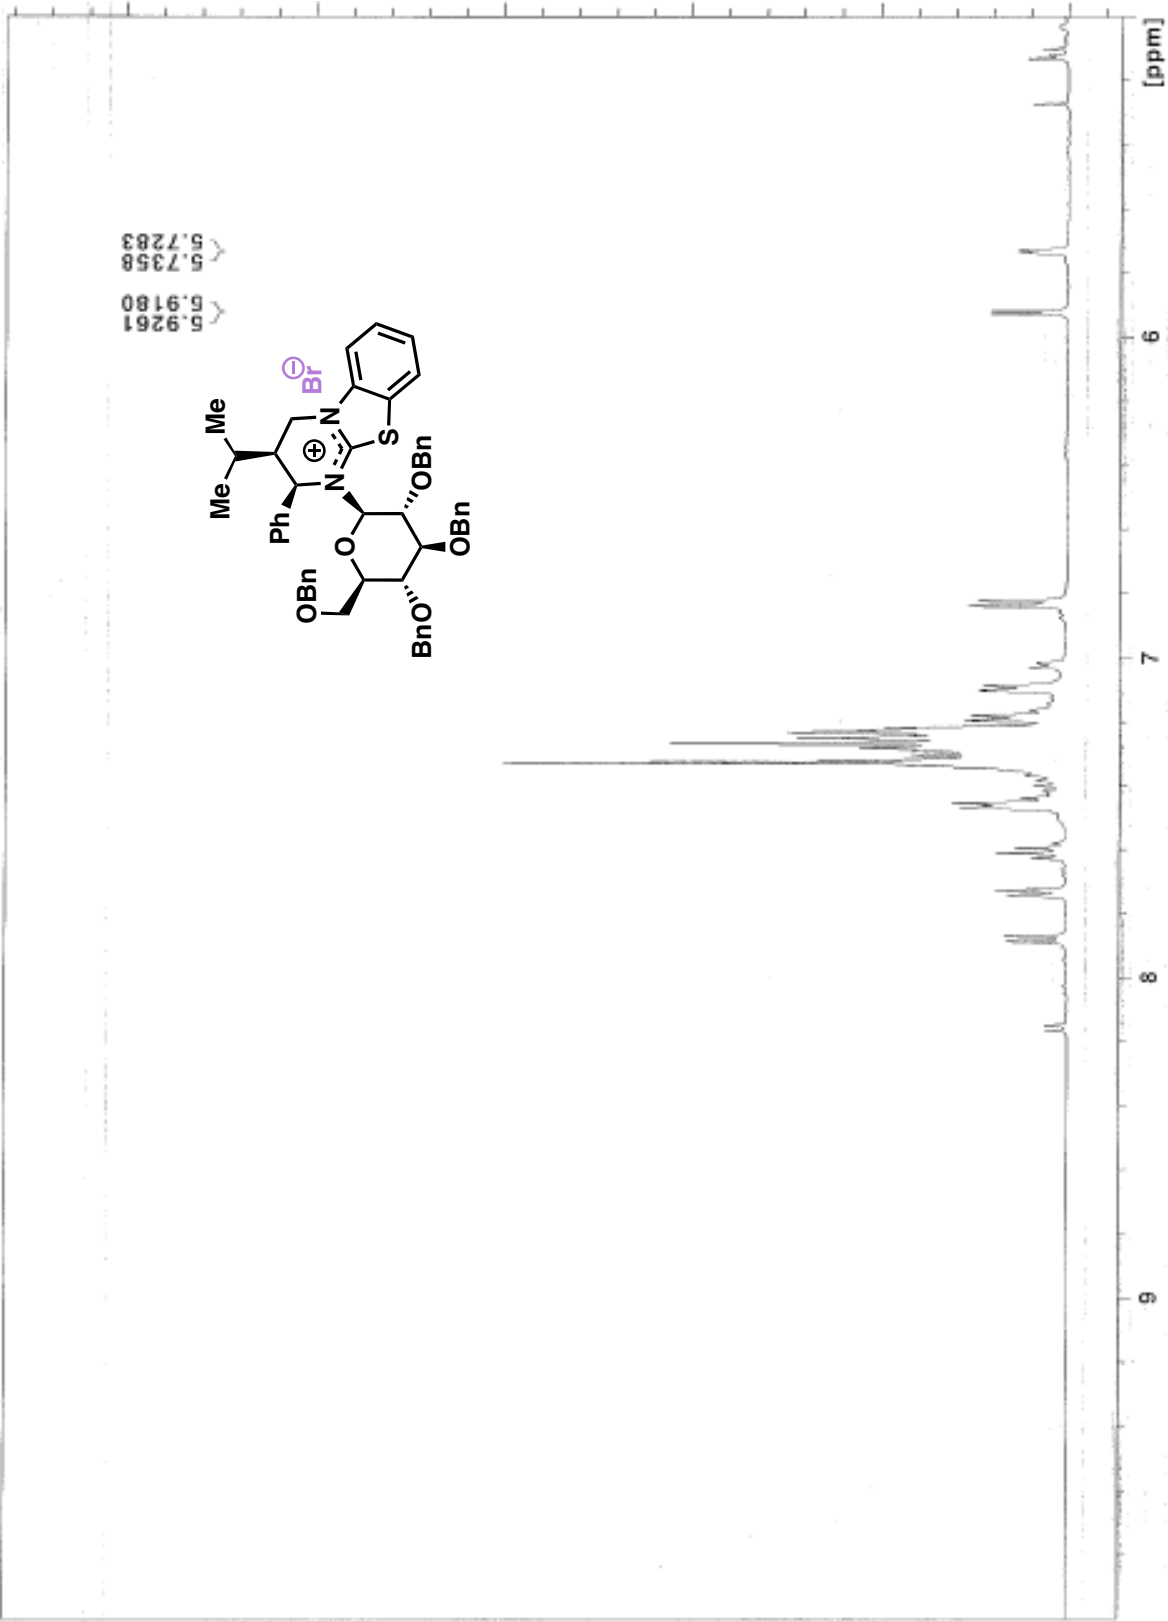



## Figure S5. Mass Spectrometry Study

RIC-CRE-9521\_ESI+\_ACN+H2O #1-35 RT: 0.00-0.49 Av. Sc NL: 9.54E7  
T: FTMS + p ESI Full ms [150.00-2000.00]

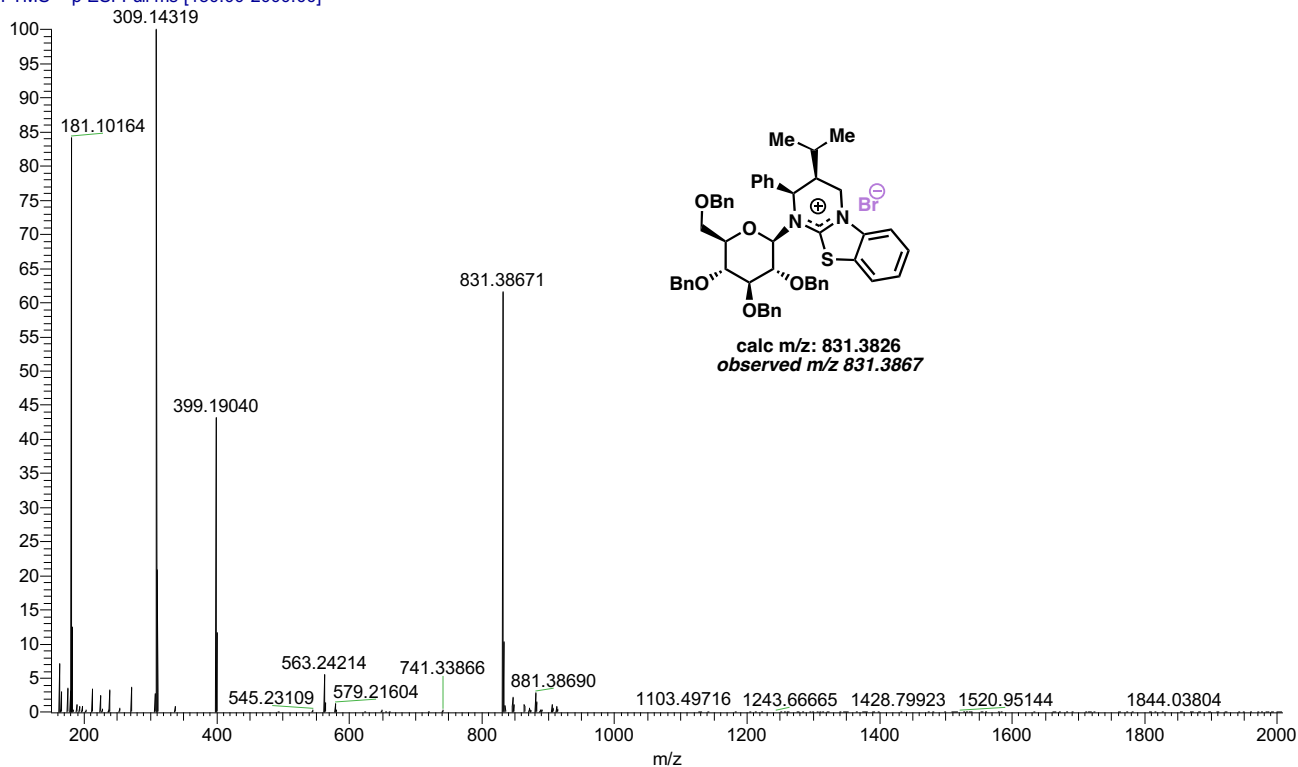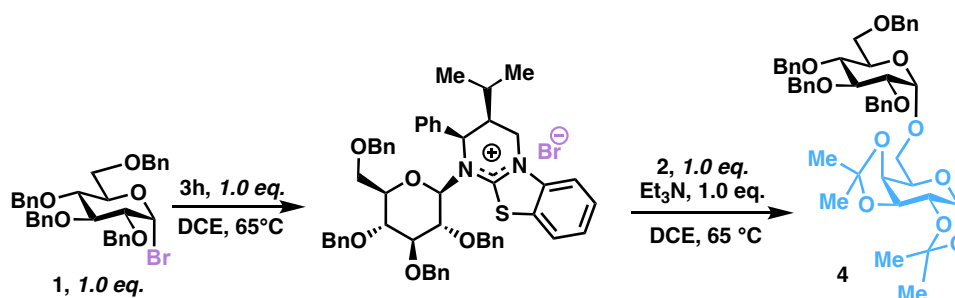

A mixture of **1** (40 mg, 0.066 mmol, 1.0 equiv.) and **3h** (30 mg, 0.09 mmol, 1.5 equiv.) were heated in 1,2 DCE (0.4 mL) at 65 °C for 12 h. The reaction was concentrated to dryness and a small amount dissolved in MeCN. The cationic adduct **5**, was confirmed through electrospray ionization (ESI) with an  $m/z$  observed at 831.3867 (*vide supra*). The dried material was mixed with **2** (17.2 mg, 0.066 mmol, 1.0 equiv.), and Et<sub>3</sub>N (6.7 μL, 0.066 mmol, 1.0 equiv.) in 1,2 DCE (0.4 mL) 65 °C for 24h. Following concentration and purification on silica gel (hexanes/ethyl acetate), **4** was obtained (14 mg, 27% yield).

\*Note – The adduct is very hygroscopic and has limited stability, reflected in the low yield of the stoichiometric reaction.

### 3. Experimental Procedures

#### General Procedure A

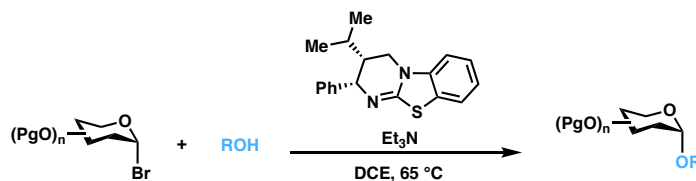

A 10 mL flame-dried round bottle flask was charged with glucosyl bromide (0.4 mmol, 2.0 equiv.), alcohol (0.2 mmol, 1.0 equiv.), catalyst **3h** (0.04 mmol, 20 mol%), Et<sub>3</sub>N (0.4 mmol, 2.0 equiv.) and DCE (0.8 mL). The reaction was stirred at 65 °C for 20-24 h, concentrated, and purified by silica gel flash chromatography (hexanes/ethyl acetate) to give the desired product.

#### General Procedure B

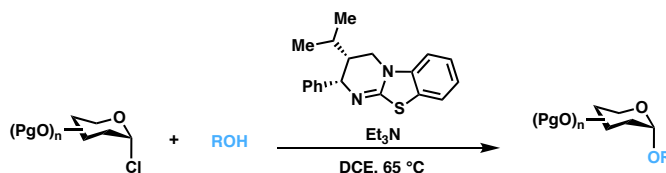

A 10 mL flame-dried round bottle flask was charged with galactosyl or rhamnosyl chloride (0.4 mmol, 2.0 equiv), alcohol (0.2 mmol, 1.0 equiv), catalyst **3h** (0.04 mmol, 20 mol%), Et<sub>3</sub>N (0.4 mmol, 2.0 equiv.) and DCE (0.4 mL). The resulting solution was stirred at 65 °C for 18-24 h, concentrated, and purified by silica gel flash chromatography (hexanes/ethyl acetate) to give the desired product.

The  $\alpha$ : $\beta$  ratio of the desired products were determined by <sup>1</sup>H NMR analysis based on the ratio of the anomeric protons of both  $\alpha$ - and  $\beta$ -anomers. When the anomeric protons are overlapped, other diagnostic protons of both anomers were analyzed.

#### General Procedure C – Preparation of Glucosyl Bromides

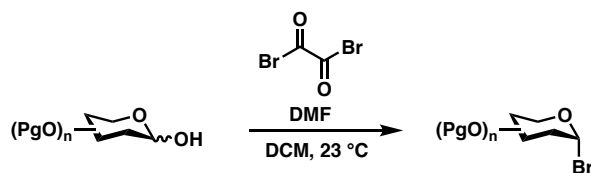

To a stirred (0.1M DCM) solution of hemiacetal at 23 °C was added DMF (1.5 equiv.). To this was added a solution of oxalyl bromide (2.0M DCM, 4.0 equiv.), dropwise. Upon consumption of starting material, the reaction was poured into saturated aqueous NaHCO<sub>3</sub>, and extracted three times with 1:1 hexanes:ethyl acetate. The combined organic layers were washed with brine, dried over sodium sulfate and concentrated, *in vacuo*. The product was used immediately and was sufficiently pure.

---

## General Procedure D – Preparation of Galactosyl and Rhamnosyl Chlorides

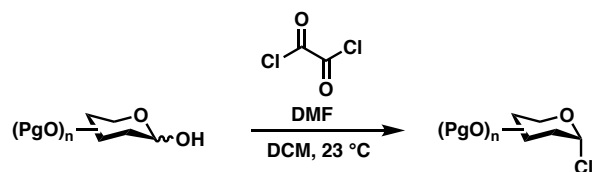

To a stirred (0.1M DCM) solution of hemiacetal at 23°C was added DMF (1.5 equiv.). To this was added neat oxalyl chloride (4.0 equiv.), dropwise. Upon consumption of starting material, the reaction was poured into saturated aqueous NaHCO<sub>3</sub>, and extracted three times with 1:1 hexanes:ethyl acetate. The combined organic layers were washed with brine, dried over sodium sulfate and concentrated, *in vacuo*. Silica gel chromatography (hexanes:ethyl acetate) furnished the glycosyl chlorides.

#### 4. Experimental Data

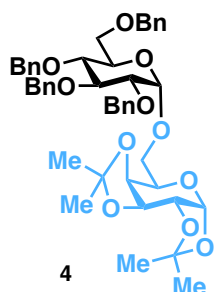

General Procedure A: 130 mg, 83%,  $\alpha:\beta = 9.5:1$

Data for  $\alpha$  anomer 4:

$R_f = 0.39$  (hexane/AcOEt 4:1)

$^1\text{H NMR}$  (500 MHz,  $\text{CDCl}_3$ ):

$\delta$  7.40-7.23 (m, 18H), 7.17-7.12 (m, 2H), 5.53 (d,  $J = 5.0$  Hz, 1H), 5.01 (d,  $J = 3.7$  Hz, 1H), 4.99 (d,  $J = 10.9$  Hz, 1H), 4.82 (dd,  $J = 12.2, 10.8$  Hz, 2H), 4.75 (d,  $J = 11.9$  Hz, 1H), 4.70 (d,  $J = 11.9$  Hz, 1H), 4.63 (d,  $J = 12.1$  Hz, 1H), 4.60 (dd,  $J = 7.9, 2.4$  Hz, 1H), 4.48 (dd,  $J = 11.5, 8.4$  Hz, 2H), 4.36 (dd,  $J = 7.9, 1.9$  Hz, 1H), 4.32 (dd,  $J = 5.0, 2.4$  Hz, 1H), 4.05 (ddd,  $J = 7.9, 6.1, 1.9$  Hz, 1H), 3.99 (t,  $J = 9.3$  Hz, 1H), 3.83 (dt,  $J = 9.9, 2.7$  Hz, 1H), 3.81-3.73 (m, 3H), 3.68 (dd,  $J = 10.1, 9.0$  Hz, 1H), 3.65 (dd,  $J = 10.7, 2.1$  Hz, 1H), 3.59 (dd,  $J = 9.6, 3.6$  Hz, 1H), 1.53 (s, 3H), 1.45 (s, 3H), 1.33 (s, 3H), 1.31 (s, 3H)

$^{13}\text{C NMR}$  (125 MHz,  $\text{CDCl}_3$ ):

$\delta$  138.90, 138.31, 137.98, 128.61, 128.32, 127.90, 127.85, 127.79, 127.66, 127.61, 127.48, 109.17, 108.57, 97.01, 96.27, 81.93, 79.76, 77.53, 75.60, 74.96, 73.43, 72.31, 70.77, 70.61, 70.18, 68.31, 66.16, 65.65, 29.67, 26.14, 26.04, 24.89, 24.61.

IR ( $\text{cm}^{-1}$ ): 2922, 1724, 1496, 1453, 1371, 1255, 1209, 1163, 1066, 1027, 999, 918, 889, 735, 696, 511.

HRMS-ESI ( $m/z$ ):  $[\text{M}+\text{H}]^+$  calcd. for  $[\text{C}_{46}\text{H}_{54}\text{O}_{11}]^+$  783.3666, found 805.3556,  $[\text{M}+\text{Na}]^+$ .

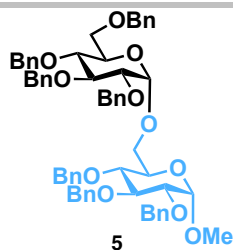

General Procedure A: 144 mg, 73%,  $\alpha:\beta = 8:1$

Data for  $\alpha$  anomer **5**:

$R_f = 0.45$  (hexane/AcOEt = 4:1)

$^1\text{H NMR}$  (500 MHz,  $\text{CDCl}_3$ ):

$\delta$  7.44-7.16 (m, 35H), 5.08-4.97 (m, 4H), 4.93-4.83 (m, 3H), 4.81-4.70 (m, 4H), 4.67-4.61 (m, 3H), 4.56-4.46 (m, 2H), 4.10-4.01 (m, 2H), 3.93-3.83 (m, 3H), 3.82-3.66 (m, 4H), 3.65-3.58 (m, 2H), 3.52 (dd,  $J = 9.6, 3.6$  Hz, 1H), 3.43 (s, 3H).

$^{13}\text{C NMR}$  (125 MHz,  $\text{CDCl}_3$ ):

$\delta$  138.78, 138.42, 138.39, 138.14, 137.94, 128.37, 128.32, 128.29, 127.97, 127.84, 127.69, 127.58, 97.92, 97.21, 82.10, 81.64, 80.10, 79.94, 77.73, 77.57, 75.68, 75.46, 74.93, 73.34, 72.31, 70.32, 70.19, 78.42, 66.00, 66.1, 55.11.

IR ( $\text{cm}^{-1}$ ): 3030, 2920, 1496, 1452, 1366, 1153, 1071, 1039, 1026, 996, 937, 735, 694, 611, 466.

HRMS-ESI ( $m/z$ ):  $[\text{M}+\text{Na}]^+$  calcd. for  $[\text{C}_{62}\text{H}_{66}\text{NaO}_{11}]^+$  1009.4497, found 1009.4494.

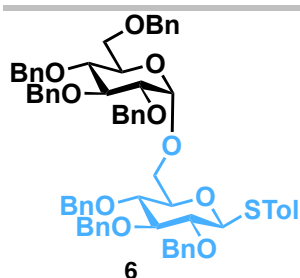

General Procedure A: 139 mg, 73%,  $\alpha:\beta = 20:1$

Data for  $\alpha$  anomer **6**:

$R_f = 0.45$  (hexane/AcOEt = 5:1)

$^1\text{H NMR}$  (500 MHz,  $\text{CDCl}_3$ ):

$\delta$  7.46 (d,  $J = 10.0$  Hz, 2H), 7.41-7.23 (m, 33H), 7.14-7.12 (m, 2H), 7.07 (d,  $J = 10.0$  Hz, 2H), 5.04 (d,  $J = 5.0$  Hz, 1H), 5.00-4.52 (m, 14H), 3.99 (t,  $J = 10.0$  Hz, 1H), 3.89-3.83 (m, 2H), 3.78-3.58 (m, 8H), 3.49-3.46 (m, 1H), 3.25 (t,  $J = 10.0$  Hz, 1H), 2.23 (s, 3H).

$^{13}\text{C NMR}$  (125 MHz,  $\text{CDCl}_3$ ):

$\delta$  138.87, 138.54, 138.48, 138.44, 138.18, 138.08, 138.04, 137.99, 137.75, 132.88, 129.76, 128.43, 128.38, 128.34, 128.22, 127.95, 127.88, 127.80, 127.72, 127.65, 127.62, 127.51, 97.34, 88.45, 86.64, 81.75, 81.09, 80.13, 78.72, 77.64, 75.63, 75.43, 74.94, 73.38, 72.41, 70.18, 68.49, 66.23, 21.07.

IR ( $\text{cm}^{-1}$ ): 3011, 2917, 1637, 1496, 1453, 1360, 1215, 1067, 1027, 803, 696, 665, 471, 422.

HRMS-ESI ( $m/z$ ):  $[\text{M}+\text{Na}]^+$  calcd. for  $[\text{C}_{68}\text{H}_{70}\text{NaSO}_{10}]^+$ , 1101.4582, found 1101.4580.

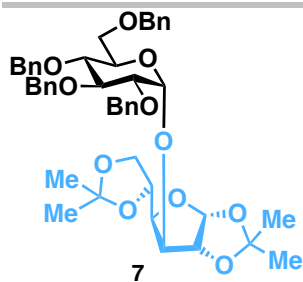

General Procedure A: 135mg, 86%,  $\alpha:\beta = 1:0$

Data for  $\alpha$  anomer 7:

TLC:  $R_f = 0.45$  (hexane/AcOEt = 4:1)

$^1\text{H}$  NMR (500 MHz,  $\text{CDCl}_3$ ):

$\delta$  7.40-7.24 (m, 18H), 7.14 (d,  $J = 6.8$  Hz, 2H), 5.89 (d,  $J = 3.6$  Hz, 1H), 5.26 (d,  $J = 3.5$  Hz, 1H), 4.98 (d,  $J = 10.8$  Hz, 1H), 4.83 (dd,  $J = 15.9, 10.7$  Hz, 2H), 4.79-4.70 (m, 2H), 4.68 (d,  $J = 3.6$  Hz, 1H), 4.63 (d,  $J = 12.1$  Hz, 1H), 4.53-4.45 (m, 3H), 4.25 (d,  $J = 2.8$  Hz, 1H), 4.15 (dd,  $J = 8.0, 2.8$  Hz, 1H), 4.06 (d,  $J = 5.6$  Hz, 2H), 3.96 (t,  $J = 9.4$  Hz, 1H), 3.84-3.79 (m, 1H), 3.73 (d,  $J = 4.2$  Hz, 2H), 3.63 (t,  $J = 9.6$  Hz, 1H), 3.58 (dd,  $J = 9.8, 3.5$  Hz, 1H), 1.50 (s, 3H,  $\text{CH}_3$ ), 1.43 (s, 3H), 1.26 (s, 3H), 1.26 (s, 3H).

$^{13}\text{C}$  NMR (125 MHz,  $\text{CDCl}_3$ ):

$\delta$  138.63, 138.14, 137.92, 137.81, 128.43, 128.37, 128.04, 127.92, 127.86, 127.73, 127.68, 127.54, 111.76, 109.04, 105.17, 97.92, 83.68, 81.48, 81.17, 80.60, 79.94, 77.64, 75.62, 75.29, 73.54, 73.03, 72.32, 71.17, 68.56, 67.03, 26.98, 26.77, 26.12, 25.46.

IR ( $\text{cm}^{-1}$ ): 2986, 2925, 1497, 1454, 1369, 1254, 1209, 1162, 1064, 1041, 1014, 957, 941, 850, 737, 696, 641, 607, 514, 469.

HRMS-ESI (m/z):  $[\text{M}+\text{Na}]^+$  calcd. for  $[\text{C}_{46}\text{H}_{54}\text{NaO}_{11}]^+$ , 805.3558, found 805.3548.

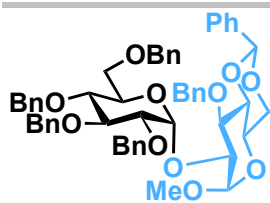

8

General Procedure A: 124mg, 69%,  $\alpha:\beta = 10:1$

Data for  $\alpha$  anomer **8**:

TLC:  $R_f = 0.40$  (hexane/AcOEt = 4:1)

$^1\text{H}$  NMR (500 MHz,  $\text{CDCl}_3$ ):

$\delta$  7.53-6.98 (m, 30H), 5.55 (s, 1H), 4.93 (d,  $J = 3.5$  Hz, 1H), 4.88 (d,  $J = 3.5$  Hz, 1H), 4.87-4.75 (m, 5H), 4.70 (d,  $J = 12.0$  Hz, 1H), 4.52 (d,  $J = 12.0$  Hz, 1H), 4.45 (d,  $J = 11.0$  Hz, 1H), 4.32-4.26 (m, 2H), 4.15-4.07 (m, 3H), 3.89-3.83 (m, 2H), 3.73-3.57 (m, 4H), 3.50-3.44 (m, 1H), 3.44 (s, 3H), 3.41-3.36 (m, 1H).

$^{13}\text{C}$  NMR (125 MHz,  $\text{CDCl}_3$ ):

$\delta$  138.82, 138.65, 138.40, 137.97, 137.91, 137.38, 128.89, 128.77, 128.37, 128.27, 128.23, 128.18, 128.01, 127.95, 127.84, 127.76, 127.60, 127.55, 127.43, 125.95, 101.20, 97.20, 94.41, 82.35, 82.10, 79.09, 77.65, 75.66, 75.7, 74.91, 74.26, 73.19, 73.01, 69.89, 69.02, 67.99, 62.25, 54.98.

IR ( $\text{cm}^{-1}$ ): 3031, 2917, 1496, 1451, 1368, 1160, 1100, 1073, 1052, 1025, 998, 969, 902, 850, 781, 730, 694, 643, 611, 574, 539, 491, 459.

HRMS-ESI ( $m/z$ ):  $[\text{M}+\text{Na}]^+$  calcd. for  $[\text{C}_{55}\text{H}_{58}\text{NaO}_{11}]^+$ , 917.3871, found 917.3870.



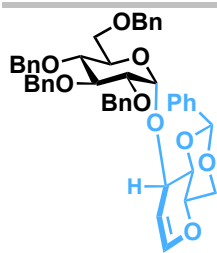

9

General Procedure A: 95 mg, 63%,  $\alpha:\beta = 7:1$

Data for  $\alpha$  anomer **9**:

TLC:  $R_f = 0.40$  (hexane/AcOEt = 4:1)

$^1\text{H}$  NMR (500 MHz,  $\text{CDCl}_3$ ):

$\delta$  7.52-7.45 (m, 2H), 7.43-7.30 (m, 18 H), 7.25-7.17 (m, 5H), 6.40 (dd,  $J = 6.0, 1.5$  Hz, 1H), 5.59 (s, 1H), 5.49 (d,  $J = 4.0$  Hz, 1H), 5.07 (d,  $J = 10.5$  Hz, 1H), 4.90 (t,  $J = 6.5$  Hz, 2H), 4.80 (dd,  $J = 6.0, 2.0$  Hz, 1H), 4.77-4.60 (m, 4H), 4.58-4.51 (m, 2H), 4.41-4.36 (m, 1H), 4.22 (dd,  $J = 8.0, 2.5$  Hz, 1H), 4.07 (t,  $J = 9.0$  Hz, 1H), 4.03-4.98 (m, 2H), 3.83 (t,  $J = 10.5$  Hz, 1H), 3.77 (dd,  $J = 7.0, 3.5$  Hz, 1H), 3.70-3.66 (m, 2H), 3.60 (dd,  $J = 9.5, 3.5$  Hz, 1H).

$^{13}\text{C}$  NMR (125 MHz,  $\text{CDCl}_3$ ):

$\delta$  144.91, 138.78, 138.12, 137.85, 137.77, 136.99, 129.12, 128.18, 128.10, 127.93, 127.85, 127.82, 127.62, 127.43, 126.11, 102.26, 101.51, 96.38, 81.68, 79.48, 78.95, 77.48, 75.58, 75.04, 73.43, 71.72, 71.28, 70.46, 68.63, 68.38, 68.30.

IR ( $\text{cm}^{-1}$ ): 3029, 2919, 1729, 1637, 1496, 1453, 1374, 1352, 1236, 1095, 1045, 1026, 1010, 955, 916, 877, 836, 736, 694.

HRMS-ESI ( $m/z$ ):  $[\text{M}+\text{Na}]^+$  calcd. for  $[\text{C}_{47}\text{H}_{48}\text{NaO}_9]^+$ , 779.3191, found 779.3190.

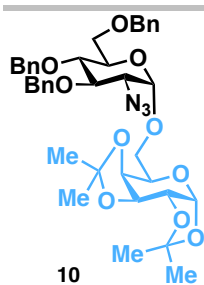

General Procedure A: 104 mg, 73%,  $\alpha:\beta = 6:1$

Data for  $\alpha$  anomer **10**:

TLC:  $R_f = 0.45$  (hexane/AcOEt = 4:1)

$^1\text{H}$  NMR (500 MHz,  $\text{CDCl}_3$ ):

$\delta$  7.39-7.18 (m, 20H), 5.52 (d,  $J = 5.0$  Hz, 1H), 4.99 (d,  $J = 5.0$  Hz, 1H, H-1), 4.87 (s, 2H), 4.80 (d,  $J = 11.0$  Hz, 1H), 4.70 (s, 1H), 4.65-4.61 (m, 2H), 4.54-4.47 (m, 2H), 4.33-4.30 (m, 2H), 4.02-3.98 (m, 2H), 3.90-3.87 (m, 1H), 3.84-3.70 (m, 4H), 3.67 (dd,  $J = 11.0$  Hz, 2.0, 1H), 3.35 (dd,  $J = 11.0$ , 2.0, 1H), 1.54 (s, 3H), 1.44 (s, 3H), 1.34 (s, 3H), 1.33 (s, 3H).

$^{13}\text{C}$  NMR (125 MHz,  $\text{CDCl}_3$ ):

$\delta$  138.00, 137.81, 128.53, 128.41, 128.37, 127.96, 127.90, 127.78, 127.72, 127.62, 126.94, 109.24, 108.57, 98.24, 96.21, 79.85, 78.19, 75.24, 74.91, 73.47, 70.79, 70.63, 70.61, 70.53, 68.10, 66.80, 66.19, 63.33, 26.08, 25.93, 24.91, 24.34.

IR ( $\text{cm}^{-1}$ ): 2923, 2105, 1496, 1454, 1381, 1309, 1255, 1209, 1152, 1066, 1044, 1001, 918, 889, 862, 735, 696, 510, 459.

HRMS-ESI ( $m/z$ )  $[\text{M}+\text{Na}]^+$  calcd. for  $[\text{C}_{39}\text{H}_{47}\text{NaN}_3\text{O}_{10}]^+$ , 740.3154, found 740.3157.

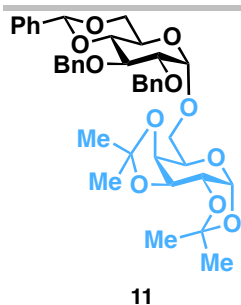

General Procedure A: 117 mg, 85%,  $\alpha:\beta = 20:1$

Data for  $\alpha$  anomer **11**:

TLC:  $R_f = 0.4$  (hexane/AcOEt = 5:1)

$^1\text{H}$  NMR (500 MHz,  $\text{CDCl}_3$ ):

$\delta$  7.52-7.50 (m, 2H), 7.40-7.25 (m, 13H), 5.59 (s, 1H), 5.55 (d,  $J = 5.0$  Hz, 1H), 4.96-4.75 (m, 5H), 4.62 (dd,  $J = 7.5, 2.0$  Hz, 1H), 4.39-4.29 (m, 3H), 4.08-4.04 (m, 2H), 3.93-3.90 (m, 1H), 3.83-3.77 (m, 2H), 3.73 (t,  $J = 10.5$  Hz, 1H), 3.64-3.58 (m, 2H), 1.56 (s, 3H), 1.44 (s, 3H), 1.34 (s, 3H), 1.33 (s, 3H).

$^{13}\text{C}$  NMR (125 MHz,  $\text{CDCl}_3$ ):

$\delta$  138.82, 138.26, 137.46, 128.82, 128.48, 128.32, 128.22, 128.16, 127.99, 127.89, 127.73, 127.69, 127.47, 126.00, 109.17, 108.61, 101.14, 98.31, 96.28, 82.06, 79.21, 78.51, 75.21, 72.84, 70.77, 70.61, 68.98, 66.84, 65.86, 62.41, 26.13, 26.02, 24.89, 24.57.

IR ( $\text{cm}^{-1}$ ): 2986, 2933, 1496, 1454, 1371, 1255, 1209, 1165, 1087, 1068, 1028, 994, 916, 888, 733, 696, 511, 437.

HRMS-ESI ( $m/z$ ):  $[\text{M}+\text{Na}]^+$  calcd. for  $[\text{C}_{39}\text{H}_{46}\text{NaO}_{11}]^+$ , 713.2932, found 713.2926.

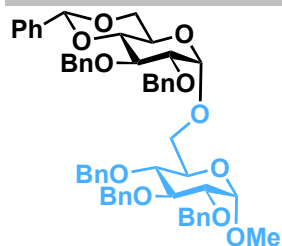

12

General Procedure A: 112 mg, 65%,  $\alpha:\beta = 18:1$

Data for  $\alpha$  anomer **12**:

TLC:  $R_f = 0.45$  (hexane/AcOEt = 4:1)

$^1\text{H}$  NMR (500 MHz,  $\text{CDCl}_3$ ):

$\delta$  7.48-7.23 (m, 30H), 5.55 (s, 1H), 4.98-4.87 (m, 5H), 4.82 (d,  $J = 2.0$  Hz, 1H, H-1), 4.80 (m, 1H), 4.74-4.62 (5H), 4.58-4.56 (m, 2H), 4.21 (q,  $J = 5.0$  Hz, 1H), 4.02-3.96 (m, 2H), 3.89 (td,  $J = 10.0, 4.5$  Hz, 1H), 3.80-3.52 (m, 7H), 3.46-3.42 (m, 2H), 3.34 (s, 3H).

$^{13}\text{C}$  NMR (125 MHz,  $\text{CDCl}_3$ ):

$\delta$  138.81, 138.68, 138.36, 138.14, 137.49, 128.88, 128.41, 128.36, 128.20, 128.01, 127.97, 127.88, 127.73, 127.61, 127.50, 126.05, 101.29, 98.20, 97.97, 82.17, 82.09, 80.06, 79.31, 77.91, 77.72, 75.70, 75.03, 73.35, 72.84, 70.34, 69.08, 66.34, 62.52, 55.19.

IR ( $\text{cm}^{-1}$ ): 3031, 2918, 1497, 1452, 1367, 1327, 1213, 1159, 1088, 1069, 1025, 916, 737, 694, 617, 596, 461.

HRMS-ESI ( $m/z$ ):  $[\text{M}+\text{Na}]^+$  calcd. for  $[\text{C}_{55}\text{H}_{58}\text{NaO}_{11}]^+$ , 917.3871, found 917.3865.

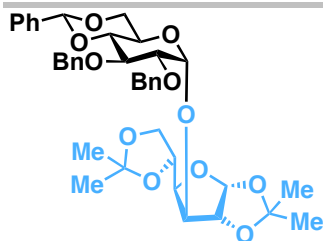

13

General Procedure A: 77%,  $\alpha:\beta > 20:1$

Data for  $\alpha$  anomer **13**:

TLC:  $R_f = 0.45$  (hexane/AcOEt = 4:1)

$^1\text{H}$  NMR (500 MHz,  $\text{CDCl}_3$ ):

$\delta$  7.52-7.50 (m, 2H), 7.42-7.27 (m, 13H), 5.93 (d,  $J = 3.5$  Hz, 1H), 5.59 (s, 1H), 5.26 (d,  $J = 3.5$  Hz, 1H), 4.94 (d,  $J = 11.0$  Hz, 1H), 4.84 (d,  $J = 11.0$  Hz, 1H), 4.80 (s, 2H), 4.59 (d,  $J = 3.5$  Hz, 1H), 4.54-4.50 (m, 1H), 4.34 (q,  $J = 4.5$  Hz, 1H), 4.25 (d,  $J = 2.5$  Hz, 1H), 4.10 (dd,  $J = 8.5, 3.0$  Hz, 1H), 4.08-3.99 (m, 3H), 3.89-3.84 (m, 1H), 3.76 (t,  $J = 10.5$  Hz, 1H), 3.66 (t,  $J = 10.5$  Hz, 1H), 3.60 (dd,  $J = 11.5, 3.5$  Hz, 1H), 1.51 (s, 3H), 1.43 (s, 3H), 1.32 (s, 3H), 1.27 (s, 3H).

$^{13}\text{C}$  NMR (125 MHz,  $\text{CDCl}_3$ ):

$\delta$  138.56, 138.05, 137.16, 128.95, 128.34, 128.29, 127.92, 127.71, 127.60, 125.86, 111.93, 109.13, 105.16, 101.2, 98.78, 84.05, 82.20, 81.17, 80.29, 79.20, 78.11, 75.22, 73.68, 72.06, 68.94, 67.12, 63.34, 27.08, 26.81, 26.31, 25.46.

IR ( $\text{cm}^{-1}$ ): 2986, 2934, 1732, 1497, 1454, 1371, 1255, 1212, 1150, 1071, 1017, 913, 841, 734, 696, 678, 655, 507, 457.

HRMS-ESI (m/z):  $[\text{M}+\text{Na}]^+$  calcd. for  $[\text{C}_{39}\text{H}_{46}\text{NaO}_{11}]^+$ , 713.2932, found 713.2935.

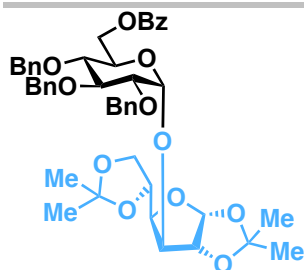

14

General Procedure A: 131 mg, 82%,  $\alpha:\beta > 20:1$

Data for  $\alpha$  anomer **14**:

TLC  $R_f = 0.45$  (hexane/AcOEt = 4:1)

$^1\text{H}$  NMR (500 MHz,  $\text{CDCl}_3$ ):

$\delta$  7.98-7.96 (m, 2H), 7.48 (t,  $J = 6.0$  Hz, 1H), 7.36-7.17 (m, 16H), 5.82 (d,  $J = 4.0$  Hz, 1H), 5.20 (d,  $J = 3.5$  Hz, 1H), 4.92 (d,  $J = 10.5$  Hz, 1H), 4.85 (d,  $J = 10.5$  Hz, 1H), 4.75 (t,  $J = 11.0$  Hz, 1H), 4.64-4.62 (m, 1H), 4.55-4.51 (m, 3H), 4.44-4.38 (m, 2H), 4.20 (d,  $J = 3.0$  Hz, 1H), 4.03-3.92 (m, 5H), 3.53-3.48 (m, 2H), 1.41 (s, 3H), 1.32 (s, 3H), 1.16 (s, 3H), 1.14 (s, 3H).

$^{13}\text{C}$  NMR (125 MHz,  $\text{CDCl}_3$ ):

$\delta$  166.30, 138.38, 138.00, 137.48, 133.08, 129.78, 129.58, 128.45, 128.41, 128.35, 128.23, 128.10, 127.97, 127.73, 127.45, 111.87, 109.19, 105.17, 97.55, 84.02, 81.41, 81.22, 80.21, 80.08, 77.82, 75.80, 75.59, 73.09, 72.18, 69.88, 67.16, 63.76, 27.07, 26.82, 26.18, 25.48.

IR ( $\text{cm}^{-1}$ ): 2986, 2932, 1719, 1602, 1497, 1453, 1371, 1335, 1273, 1212, 1145, 1065, 1026, 841, 735, 711, 696, 459, 430.

HRMS-ESI ( $m/z$ ):  $[\text{M}+\text{Na}]^+$  calcd. for  $[\text{C}_{46}\text{H}_{52}\text{NaO}_{12}]^+$ , 819.3351, found 819.3351.

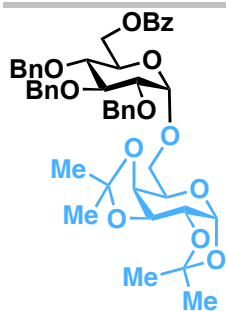

15

General Procedure A: 127 mg, 80%,  $\alpha:\beta > 20:1$

Data for  $\alpha$  anomer **15**:

TLC:  $R_f = 0.40$  (hexane/AcOEt = 5:1)

$^1\text{H}$  NMR (500 MHz,  $\text{CDCl}_3$ ):

$\delta$  8.03-8.02 (m, 2H), 7.56-7.22 (18H), 5.55 (d,  $J = 5.0$  Hz, 1H), 5.08 (d,  $J = 10.5$  Hz, 1H), 5.01 (d,  $J = 3.5$  Hz, 1H), 4.92 (d,  $J = 11.0$  Hz, 1H), 4.85 (d,  $J = 11.0$  Hz, 1H), 4.79 (d,  $J = 11.0$  Hz, 1H), 4.73 (d,  $J = 11.0$  Hz, 1H), 4.64-4.59 (m, 2H), 4.55 (d,  $J = 2.5$  Hz, 1H), 4.33-4.32 (m, 2H), 4.14-4.07 (m, 3H), 3.86-3.77 (m, 2H), 3.68 (m, 2H), 1.56 (s, 3H), 1.45 (s, 3H), 1.34 (s, 3H), 1.32 (s, 3H).

$^{13}\text{C}$  NMR (125 MHz,  $\text{CDCl}_3$ ):

$\delta$  166.19, 138.58, 138.17, 137.83, 132.94, 129.89, 129.64, 128.39, 128.32, 128.06, 127.99, 127.80, 127.74, 127.65, 109.20, 108.56, 96.72, 96.27, 81.89, 79.96, 77.47, 75.80, 75.00, 72.35, 70.87, 70.62, 70.53, 68.77, 66.55, 65.78, 63.45, 26.10, 26.01, 24.88, 24.59.

IR ( $\text{cm}^{-1}$ ): 2917, 1719, 1602, 1497, 1453, 1381, 1337, 1273, 1207, 1164, 1066, 1026, 998, 918, 888, 735, 711, 696, 672, 512, 486, 463, 420.

HRMS-ESI ( $m/z$ ):  $[\text{M}+\text{Na}]^+$  calcd. for  $[\text{C}_{46}\text{H}_{52}\text{NaO}_{12}]^+$ , 819.3351, found 819.3352.

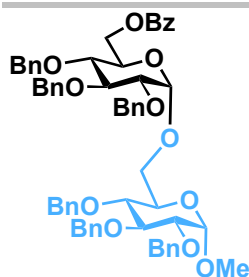

16

General Procedure A: 132 mg, 66%,  $\alpha:\beta = 16:1$

Data for  $\alpha$  anomer **16**:

TLC:  $R_f = 0.40$  (hexane/AcOEt = 4:1)

$^1\text{H}$  NMR (500 MHz,  $\text{CDCl}_3$ ):

$\delta$  7.90-7.88 (m, 2H), 7.47-7.44 (m, 1H), 7.33-7.14 (m, 32H), 4.90-4.81 (m, 5H), 4.73 (dd,  $J = 10.5, 4.5$  Hz, 1H), 4.63-4.40 (m, 8H), 4.31 (dd,  $J = 12.0, 4.5$  Hz, 1H), 3.95-3.88 (m, 3H), 3.74-3.68 (m, 2H), 3.63-3.61 (m, 1H), 3.54-3.50 (m, 2H), 3.47 (dd,  $J = 10.0, 4.0$  Hz, 1H), 3.33 (dd,  $J = 9.5, 3.5$  Hz, 1H), 3.27 (s, 3H).

$^{13}\text{C}$  NMR (125 MHz,  $\text{CDCl}_3$ ):

$\delta$  166.16, 138.79, 138.49, 138.30, 138.12, 137.96, 132.99, 129.95, 129.61, 128.39, 128.17, 127.96, 127.90, 127.82, 127.76, 127.71, 127.67, 127.57, 97.88, 96.87, 82.07, 81.67, 80.15, 80.12, 77.81, 77.52, 75.71, 75.00, 73.31, 72.41, 70.34, 68.85, 65.98, 63.41, 55.15.

IR ( $\text{cm}^{-1}$ ): 3030, 2916, 1719, 1602, 1496, 1452, 1358, 1272, 1159, 1088, 1068, 1025, 912, 733, 711, 695, 611, 531, 460.

HRMS-ESI ( $m/z$ ):  $[\text{M}+\text{Na}]^+$  calcd. for  $[\text{C}_{62}\text{H}_{64}\text{NaO}_{12}]^+$ , 1023.4290, found 1023.4288.



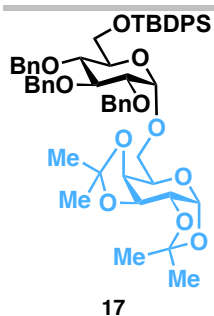

General Procedure A 115 mg: 62%,  $\alpha:\beta = 7:1$

Data for  $\alpha$  anomer **17**:

$R_f = 0.45$  (hexane/AcOEt = 5:1)

$^1\text{H NMR}$  (500 MHz,  $\text{CDCl}_3$ ):

$\delta$  7.74-7.70 (m, 4H), 7.45-7.40 (m, 4H), 7.39-7.29 (m, 16H), 7.23-7.20 (m, 1H), 5.54 (d,  $J = 5.0$  Hz, 1H), 5.09 (d,  $J = 3.5$  Hz, 1H), 5.02 (d,  $J = 10.5$  Hz, 1H), 4.94 (d,  $J = 10.5$  Hz, 1H), 4.86-4.83 (m, 2H), 4.75-4.69 (m, 2H), 4.63 (dd,  $J = 8.0, 2.5$  Hz, 1H), 4.38 (dd,  $J = 8.0, 2.0$  Hz, 1H), 4.33 (q,  $J = 2.5$  Hz, 1H), 4.08-4.04 (m, 2H), 3.99-3.90 (m, 2H), 3.83-3.70 (m, 3H), 3.63 (dd,  $J = 9.5, 3.5$  Hz, 1H), 1.54 (s, 3H), 1.49 (s, 3H), 1.34 (s, 6H), 1.08 (s, 9H).

$^{13}\text{C NMR}$  (125 MHz,  $\text{CDCl}_3$ ):

$\delta$  138.85, 138.48, 138.37, 135.89, 135.80, 135.59, 133.67, 133.23, 129.54, 129.50, 128.34, 128.31, 128.21, 128.09, 127.83, 127.69, 127.62, 127.57, 127.49, 109.13, 108.49, 96.28, 82.04, 80.21, 77.58, 75.9, 75.79, 75.07, 72.13, 71.48, 70.77, 70.64, 70.62, 65.46, 65.32, 62.64, 26.80, 26.11, 26.05, 24.88, 24.60, 19.30.

IR ( $\text{cm}^{-1}$ ): 2930, 1496, 1454, 1428, 1381, 1255, 1210, 1162, 1067, 998, 918, 823, 735, 696, 648, 612, 504, 466.

HRMS-ESI ( $m/z$ ):  $[\text{M}+\text{Na}]^+$  calcd. for  $[\text{C}_{55}\text{H}_{66}\text{NaSiO}_{11}]^+$ , 953.4267, found 953.4278.

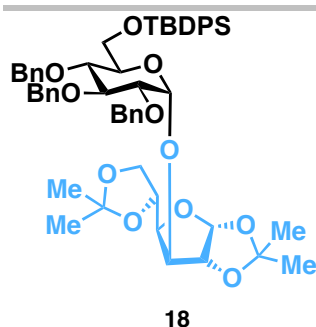

General Procedure A: 116 mg, 63%,  $\alpha:\beta > 20:1$

Data for  $\alpha$  anomer **18**:

TLC:  $R_f = 0.45$  (hexane/AcOEt = 4:1)

$^1\text{H}$  NMR (500 MHz,  $\text{CDCl}_3$ ):

$\delta$  7.73-7.70 (m, 4H), 7.43-7.27 (m, 19H), 7.15-7.13 (m, 2H), 5.84 (d,  $J = 3.5$  Hz, 1H, H-1), 5.26 (d,  $J = 3.0$  Hz, 1H), 4.97 (d,  $J = 11.0$  Hz, 1H), 4.90 (d,  $J = 10.5$  Hz, 1H), 4.84-4.80 (m, 2H), 4.74 (d,  $J = 12.0$  Hz, 1H), 4.61-4.58 (m, 2H), 4.52-4.51 (m, 1H), 4.25 (d,  $J = 3.0$  Hz, 1H), 4.13 (dd,  $J = 8.0, 2.5$  Hz, 1H), 4.08-4.01 (m, 2H), 3.99 (t,  $J = 9.0$  Hz, 1H), 3.91 (d,  $J = 3.0$  Hz, 1H), 3.76-3.74 (m, 1H), 3.67 (t,  $J = 9.0$  Hz, 1H), 3.57 (dd,  $J = 10.0, 3.5$  Hz, 1H), 1.47 (s, 3H), 1.45 (s, 3H), 1.27 (s, 3H), 1.20 (s, 3H), 1.07 (s, 9H).

$^{13}\text{C}$  NMR (125 MHz,  $\text{CDCl}_3$ ):

$\delta$  138.59, 138.27, 137.97, 135.80, 135.66, 133.43, 133.17, 129.65, 129.60, 128.45, 128.41, 128.38, 128.04, 128.02, 127.82, 127.69, 127.64, 127.59, 127.41, 111.82, 105.13, 97.78, 83.83, 81.49, 81.22, 80.43, 80.27, 77.69, 75.77, 75.40, 73.16, 72.31, 67.07, 62.91, 29.68, 27.06, 26.84, 26.26, 25.47, 19.27.

IR ( $\text{cm}^{-1}$ ): 2930, 1497, 1454, 1427, 1371, 1255, 1213, 1145, 1066, 1036, 957, 882, 842, 823, 736, 696, 613, 503, 489.

HRMS-ESI ( $m/z$ ):  $[\text{M}+\text{Na}]^+$  calcd. for  $[\text{C}_{55}\text{H}_{66}\text{NaSiO}_{11}]^+$ , 953.4267, found 953.4277.

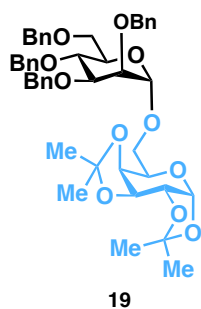

General Procedure B: mg, %,  $\alpha:\beta = 2:1$

Data for  $\alpha$  anomer: **19**

$R_f = 0.40$  (hexane/AcOEt 4:1)

$^1\text{H NMR}$  (500 MHz,  $\text{CDCl}_3$ ):

$\delta$  7.41 – 7.23 (m, 18H), 7.19 – 7.14 (m, 2H), 5.53 (d,  $J = 4.9$  Hz, 1H), 5.03 (d,  $J = 1.9$  Hz, 1H), 4.88 (d,  $J = 10.7$  Hz, 1H), 4.75 (d,  $J = 3.6$  Hz, 2H), 4.70 (d,  $J = 12.2$  Hz, 1H), 4.61 (dd,  $J = 8.1, 2.6$  Hz, 3H), 4.53 (t,  $J = 11.0$  Hz, 2H), 4.32 (dd,  $J = 5.1, 2.4$  Hz, 1H), 4.17 (dd,  $J = 7.9, 1.9$  Hz, 1H), 4.03 (t,  $J = 9.1$  Hz, 1H), 3.98 (td,  $J = 6.7, 1.9$  Hz, 1H), 3.92 (dd,  $J = 9.4, 3.1$  Hz, 1H), 3.87 – 3.77 (m, 4H), 3.76 – 3.68 (m, 2H), 1.52 (s, 3H), 1.44 (s, 3H), 1.34 (s, 6H).

$^{13}\text{C NMR}$  (125 MHz,  $\text{CDCl}_3$ ):

$\delta$  138.74, 138.64, 138.59, 138.52, 128.43, 128.41, 128.15, 127.92, 127.75, 127.69, 127.65, 127.60, 127.55, 109.48, 108.69, 97.40, 96.48, 80.19, 75.23, 74.99, 74.71, 73.46, 72.46, 72.22, 71.05, 70.81, 70.74, 69.25, 65.50, 65.39, 26.28, 26.12, 25.05, 24.72.

IR ( $\text{cm}^{-1}$ ): 3029, 2986, 2910, 1496, 1453, 1381, 1370, 1254, 1209, 1167, 1097, 1066, 1027, 1000, 901, 862, 804, 733, 696, 646, 602, 511, 459

HRMS-ESI ( $m/z$ ):  $[\text{M}+\text{H}]^+$  calcd. for  $[\text{C}_{46}\text{H}_{55}\text{O}_{11}]^+$  783.3700, found 783.3649.

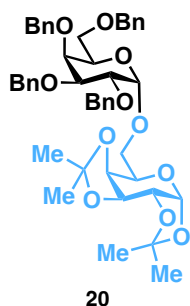

General Procedure B: 137 mg, 88%,  $\alpha:\beta = 20:1$

Data for  $\alpha$  anomer **20**:

TLC:  $R_f = 0.45$  (hexane/AcOEt = 4:1)

$^1\text{H}$  NMR (500 MHz,  $\text{CDCl}_3$ ):

$\delta$  7.38 (ddd,  $J = 7.9, 3.5, 1.5$  Hz, 3H), 7.35-7.24 (m, 17H), 5.51 (d,  $J = 5.0$  Hz, 1H), 5.01 (d,  $J = 3.7$  Hz, 1H), 4.94 (d,  $J = 11.5$  Hz, 1H), 4.83 (d,  $J = 11.7$  Hz, 1H), 4.79-4.70 (m, 3H), 4.61-4.54 (m, 2H), 4.48 (d,  $J = 11.8$  Hz, 1H), 4.42 (d,  $J = 11.8$  Hz, 1H), 4.34-4.27 (m, 2H), 4.09-3.99 (m, 4H), 3.96 (dd,  $J = 10.1, 2.8$  Hz, 1H), 3.79 (dd,  $J = 10.5, 6.4$  Hz, 1H), 3.74 (dd,  $J = 10.5, 7.1$  Hz, 1H), 3.58 (dd,  $J = 9.2, 7.5$  Hz, 1H), 3.52 (dd,  $J = 9.2, 5.7$  Hz, 1H), 1.52 (s, 3H), 1.43 (s, 3H), 1.33 (s, 3H), 1.30 (s, 3H).

$^{13}\text{C}$  NMR (125 MHz,  $\text{CDCl}_3$ ):

$\delta$  138.91, 138.73, 138.05, 128.35, 128.28, 128.20, 128.16, 127.79, 127.70, 127.63, 127.46, 127.44, 127.39, 109.15, 108.48, 97.53, 96.30, 78.96, 76.39, 74.91, 74.74, 73.36, 73.02, 72.63, 70.85, 70.61, 69.12, 68.65, 66.30, 65.78, 26.13, 26.02, 24.91, 24.57.

IR ( $\text{cm}^{-1}$ ): 2917, 1496, 1453, 1370, 1308, 1254, 1209, 1165, 1095, 1066, 998, 917, 889, 865, 734, 695, 609, 511, 461.

HRMS-ESI ( $m/z$ ):  $[\text{M}+\text{Na}]^+$  calcd. for  $[\text{C}_{46}\text{H}_{54}\text{NaO}_{11}]^+$ , 805.3558, found 805.3549.

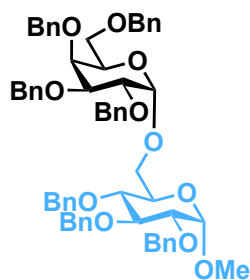

21

General Procedure B: 146 mg, 74%,  $\alpha:\beta > 20:1$

Data for  $\alpha$  anomer **21**:

TLC:  $R_f = 0.40$  (hexane/AcOEt = 4:1)

$^1\text{H}$  NMR (500 MHz,  $\text{CDCl}_3$ ):

$\delta$  7.35-7.22 (m, 35H), 4.98 (d,  $J = 3.5$  Hz, 1H), 4.94 (t,  $J = 11.5$  Hz, 2H), 4.84 (d,  $J = 11.0$  Hz, 1H), 4.81-4.77 (m, 2H), 4.74-4.68 (m, 4H), 4.58 (d,  $J = 11.0$  Hz, 2H), 4.55-4.52 (m, 2H), 4.42 (d,  $J = 11.5$  Hz, 1H), 4.35 (d,  $J = 11.5$  Hz, 1H), 4.02 (dd,  $J = 9.5, 3.5$  Hz, 1H), 3.98-3.88 (m, 4H), 3.81-3.74 (m, 2H), 3.72 (d,  $J = 11.5$  Hz, 1H), 3.58 (t,  $J = 9.5$  Hz, 1H), 3.51-3.47 (m, 2H), 3.41 (dd,  $J = 9.5, 3.5$  Hz, 1H), 3.29 (s, 3H).

$^{13}\text{C}$  NMR (125 MHz,  $\text{CDCl}_3$ ):

$\delta$  138.86, 138.75, 138.70, 138.40, 138.20, 138.04, 128.38, 128.33, 128.28, 128.22, 128.19, 127.95, 127.79, 127.68, 127.63, 127.49, 127.40, 127.34, 97.91, 97.86, 82.06, 80.15, 78.24, 77.98, 76.52, 75.67, 75.08, 74.98, 74.73, 73.32, 72.79, 72.51, 70.28, 69.36, 68.91, 66.39, 55.01.

IR ( $\text{cm}^{-1}$ ): 3030, 2917, 1721, 1496, 1453, 1355, 1278, 1208, 1132, 1091, 1025, 911, 732, 694, 607, 458.

HRMS-ESI ( $m/z$ ):  $[\text{M}+\text{Na}]^+$  calcd. for  $[\text{C}_{62}\text{H}_{66}\text{NaO}_{11}]^+$ , 1009.4497, found 1009.4494.

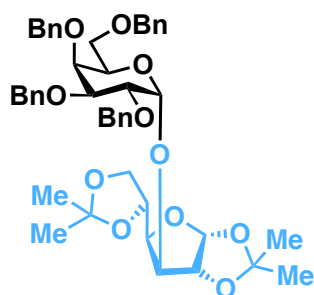

**22**

General Procedure B: 127 mg, 81%,  $\alpha:\beta > 20:1$

Data for  $\alpha$  anomer **22**:

$R_f = 0.40$  (hexane/AcOEt = 4:1)

$^1\text{H NMR}$  (500 MHz,  $\text{CDCl}_3$ ):

$\delta$  7.40-7.24 (m, 20H), 5.87 (d,  $J = 3.5$  Hz, 1H), 5.21 (d,  $J = 4.0$  Hz, 1H), 4.96 (d,  $J = 11.5$  Hz, 1H), 4.84 (d,  $J = 11.5$  Hz, 1H), 4.79 (d,  $J = 11.5$  Hz, 1H), 4.76-4.70 (m, 3H), 4.57 (d,  $J = 11.5$  Hz, 1H), 4.53-4.44 (m, 2H), 4.42 (d,  $J = 12.0$  Hz, 1H), 4.18 (d,  $J = 5.0$  Hz, 2H), 4.04 (tdd,  $J = 13.5, 8.5, 4.5$  Hz, 3H), 3.94 (d,  $J = 4.0$  Hz, 2H), 3.87 (dd,  $J = 10.0, 2.5$  Hz, 1H), 3.58 (dd,  $J = 9.5, 6.5$  Hz, 1H), 3.47 (dd,  $J = 9.5, 5.5$  Hz, 1H), 1.48 (s, 3H), 1.42 (s, 3H), 1.24 (s, 3H), 1.19 (s, 3H).

$^{13}\text{C NMR}$  (125 MHz,  $\text{CDCl}_3$ ):

$\delta$  138.23, 137.91, 137.81, 137.16, 128.64, 128.58, 128.55, 128.42, 128.30, 128.16, 127.82, 127.75, 127.65, 127.55, 111.79, 105.64, 101.30, 86.00, 82.82, 80.24, 79.07, 75.62, 75.07, 74.86, 74.67, 74.37, 73.54, 72.41, 70.86, 69.83, 69.55, 64.70, 26.79, 26.06.

IR ( $\text{cm}^{-1}$ ): 2915, 1496, 1453, 1355, 1276, 1209, 1132, 1090, 1049, 1025, 912, 781, 733, 694, 633, 620, 605, 508, 455, 430.

HRMS-ESI ( $m/z$ ):  $[\text{M}+\text{Na}]^+$  calcd. for  $[\text{C}_{46}\text{H}_{54}\text{NaO}_{11}]^+$ , 805.3558, found 805.3548.

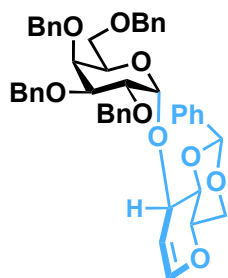

23

General Procedure B: 104 mg, 69%,  $\alpha:\beta > 20:1$

Data for  $\alpha$  anomer **23**:

TLC:  $R_f = 0.45$  (hexane/AcOEt = 4:1)

$^1\text{H}$  NMR (500 MHz,  $\text{CDCl}_3$ ):

$\delta$  7.42-7.11 (m, 25H), 6.33 (dd,  $J = 6.0, 1.0$  Hz, 1H), 5.53 (s, 1H), 5.42 (d,  $J = 3.5$  Hz, 1H), 5.29 (s, 1H), 4.93 (d,  $J = 11.5$  Hz, 1H), 4.86 ( $J = 11.5$  Hz, 1H), 4.76-4.62 (m, 4H), 4.55 (d,  $J = 11.5$  Hz, 1H), 4.44 (d,  $J = 11.5$  Hz, 1H), 4.37-4.30 (m, 2H), 4.23-4.20 (m, 1H), 4.14-3.89 (m, 6H), 3.78 (t,  $J = 10.0$  Hz, 1H), 3.56-3.51 (m, 1H).

$^{13}\text{C}$  NMR (125 MHz,  $\text{CDCl}_3$ ):

$\delta$  144.97, 138.91, 138.63, 138.45, 137.96, 137.12, 129.09, 128.37, 128.30, 128.18, 127.89, 127.78, 127.71, 127.52, 127.46, 127.38, 127.33, 126.10, 102.52, 101.35, 97.09, 79.68, 79.42, 78.91, 78.68, 75.92, 75.08, 74.76, 74.48, 73.50, 73.23, 72.28, 71.52, 69.67, 69.17, 68.81, 68.36.

IR ( $\text{cm}^{-1}$ ): 3029, 2919, 1729, 1637, 1496, 1453, 1374, 1352, 1236, 1095, 1045, 1026, 1010, 955, 916, 877, 836, 736, 694.

HRMS-ESI ( $m/z$ ):  $[\text{M}+\text{Na}]^+$  calcd. for  $[\text{C}_{47}\text{H}_{48}\text{NaO}_9]^+$ , 779.3191, found 779.3219.

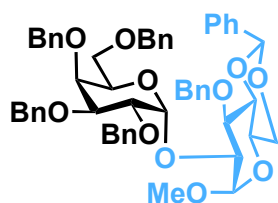

24

General Procedure B: 130 mg, 73%,  $\alpha:\beta > 20:1$

Data for  $\alpha$  anomer **24**:

TLC:  $R_f = 0.35$  (hexane/AcOEt = 4:1)

$^1\text{H}$  NMR (500 MHz,  $\text{CDCl}_3$ ):

$\delta$  7.59-7.08 (m, 30H), 5.52 (s, 1H), 4.96 (d,  $J = 3.2$  Hz, 1H), 4.93-4.77 (m, 5H), 4.73-4.66 (m, 3H), 4.52 (d,  $J = 11.4$  Hz, 1H), 4.32-4.23 (m, 4H), 4.09 (t,  $J = 9.4$  Hz, 1H), 4.03 (dd,  $J = 10.5, 2.9$  Hz, 1H), 3.95 (dd,  $J = 10.1, 2.4$  Hz, 1H), 3.88-3.75 (m, 3H), 3.70 (t,  $J = 10.1$  Hz, 1H), 3.54 (t,  $J = 9.5$  Hz, 1H), 3.48 (dd,  $J = 9.5, 6.5$  Hz, 1H), 3.42 (s, 3H), 3.34 (dd,  $J = 9.5, 6.8$  Hz, 1H).

$^{13}\text{C}$  NMR (125 MHz,  $\text{CDCl}_3$ ):

$\delta$  138.86, 138.68, 138.42, 137.40, 128.87, 128.35, 128.25, 128.15, 128.09, 127.88, 127.75, 127.56, 127.48, 127.44, 127.38, 125.98, 101.17, 97.36, 94.88, 82.39, 78.83, 75.94, 75.34, 74.98, 74.72, 73.94, 73.08, 72.89, 72.78, 69.04, 68.95, 68.84, 62.29, 55.06.

IR ( $\text{cm}^{-1}$ ): 3031, 2917, 1496, 1451, 1368, 1347, 1329, 1213, 1160, 1131, 1100, 1073, 1052, 1025, 998, 969, 902, 850, 781, 694, 611, 459.

HRMS-ESI ( $m/z$ ):  $[\text{M}+\text{Na}]^+$  calcd. for  $[\text{C}_{55}\text{H}_{58}\text{NaO}_{11}]^+$ , 917.3871, found 917.3869.



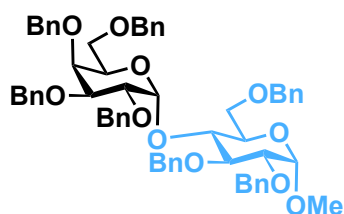

25

General Procedure B: 62%,  $\alpha:\beta$  = 20:1

Data for  $\alpha$  anomer **25**:

TLC:  $R_f$  = 0.45 (hexane/AcOEt = 4:1)

$^1\text{H}$  NMR (500 MHz,  $\text{CDCl}_3$ ):

$\delta$  7.31-7.17 (m, 35H), 5.76 (d,  $J$  = 3.5 Hz, 1H), 4.97 (d,  $J$  = 11.5 Hz, 1H), 4.86 (d,  $J$  = 11.5 Hz, 1H), 4.81 (d,  $J$  = 11.5 Hz, 1H), 4.71-4.65 (m, 4H), 4.60 (d,  $J$  = 11.5 Hz, 1H), 4.57-4.51 (m, 4H), 4.41 (d,  $J$  = 11.5 Hz, 1H), 4.29 (d,  $J$  = 11.5 Hz, 1H), 4.22 (d,  $J$  = 11.5 Hz, 1H), 4.07 (t,  $J$  = 9.5 Hz, 1H), 4.00-3.96 (m, 2H), 3.93-3.84 (m, 3H), 3.81 (dd,  $J$  = 10.0, 2.5 Hz, 1H), 3.70 (d,  $J$  = 11.0, 3.5 Hz, 1H), 3.64 (dd,  $J$  = 11.0, 2.5 Hz, 1H), 3.55 (dd,  $J$  = 9.5, 3.5 Hz, 1H), 3.49-3.39 (m, 2H), 3.37 (s, 3H).

$^{13}\text{C}$  NMR (125 MHz,  $\text{CDCl}_3$ ):

$\delta$  138.94, 128.57, 138.32, 138.23, 137.96, 128.35, 128.28, 128.22, 128.16, 127.83, 127.72, 127.64, 127.53, 127.46, 127.40, 127.32, 126.98, 126.68, 97.68, 97.43, 81.97, 80.12, 79.12, 75.59, 74.72, 74.60, 74.29, 73.74, 73.37, 73.32, 73.02, 72.72, 69.82, 69.43, 69.39, 68.64, 55.04.

IR ( $\text{cm}^{-1}$ ): 3029, 2918, 1723, 1496, 1453, 1361, 1273, 1207, 1093, 1040, 1027, 911, 732, 694, 607, 548, 461.

HRMS-ESI ( $m/z$ ):  $[\text{M}+\text{Na}]^+$  calcd. for  $[\text{C}_{62}\text{H}_{66}\text{NaO}_{11}]^+$ , 1009.4497, found 1009.4498.

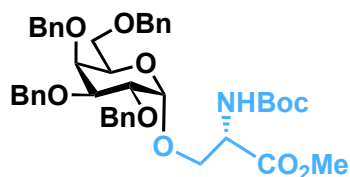

**26**

General Procedure B: 109 mg, 74%,  $\alpha:\beta = 20:1$

Data for  $\alpha$  anomer **26**:

TLC:  $R_f = 0.3$  (hexane/AcOEt = 4:1)

$^1\text{H}$  NMR (500 MHz,  $\text{CDCl}_3$ ):

$\delta$  7.33-7.27 (m, 20H), 5.68 (d,  $J = 8.5$  Hz, 1H), 4.84 (d,  $J = 11.0$  Hz, 1H), 4.73-4.62 (m, 4H), 4.54 (d,  $J = 12.0$  Hz, 1H), 4.48-4.42 (m, 2H), 4.34-4.32 (m, 2H), 4.03 (dd,  $J = 11.0, 3.5$  Hz, 1H), 3.94 (dd,  $J = 10.5, 4.0$  Hz, 1H), 3.88-3.85 (m, 2H), 3.78 (dd,  $J = 10.5, 3.0$  Hz, 1H), 3.71 (dd,  $J = 11.0, 2.5$  Hz, 1H), 3.56 (s, 3H), 3.46-3.45 (m, 2H), 1.34 (s, 9H).

$^{13}\text{C}$  NMR (125 MHz,  $\text{CDCl}_3$ ):

$\delta$  170.87, 155.55, 138.65, 138.51, 138.49, 137.88, 128.33, 128.28, 128.18, 127.8, 127.73, 127.64, 127.57, 127.4, 127.42, 127.39, 99.23, 79.82, 78.61, 76.34, 74.72, 74.67, 73.41, 73.12, 72.97, 70.26, 69.71, 68.60, 54.13, 52.30, 28.27.

IR ( $\text{cm}^{-1}$ ): 3029, 2928, 1748, 1713, 1496, 1453, 1391, 1365, 1348, 1300, 1246, 1209, 1157, 1093, 1054, 1027, 911, 734, 696, 601, 460.

HRMS-ESI ( $m/z$ ):  $[\text{M}+\text{H}]^+$  calcd. for  $[\text{C}_{43}\text{H}_{52}\text{NO}_{10}]^+$ , 742.3591, found 742.3588.

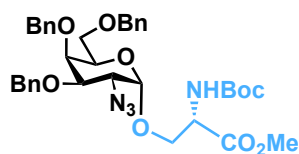

27

General Procedure B: 112 mg, 83%,  $\alpha:\beta > 20:1$

Data for  $\alpha$  anomer **27**:

TLC:  $R_f = 0.45$  (hexane/AcOEt = 4:1)

<sup>1</sup>H NMR (500 MHz, CDCl<sub>3</sub>):

$\delta$  7.35-7.24 (m, 15H), 5.56 (d,  $J = 8.5$  Hz, 1H), 4.86 (dd,  $J = 7.5, 4.0$  Hz, 1H), 4.74 (d,  $J = 11.5$  Hz, 1H), 4.67 (d,  $J = 11.5$  Hz, 1H), 4.54-4.51 (m, 3H), 4.44 (d,  $J = 12.0$  Hz, 1H), 4.06-4.02 (m, 2H), 3.96 (t,  $J = 6.5$  Hz, 1H), 3.93-3.88 (m, 3H), 3.82 (dd,  $J = 11.0, 3.5$  Hz, 1H), 3.76 (s, 3H), 3.61-3.54 (m, 2H), 1.45 (s, 9H).

<sup>13</sup>C NMR (125 MHz, CDCl<sub>3</sub>):

$\delta$  170.60, 155.42, 138.15, 137.73, 137.42, 128.50, 128.42, 128.27, 128.09, 127.91, 127.82, 127.72, 99.46, 80.07, 74.82, 73.51, 73.06, 72.11, 69.90, 69.78, 68.35, 59.54, 54.03, 52.59, 28.28.

IR (cm<sup>-1</sup>): 3367, 2930, 2162, 2151, 2108, 1747, 1713, 1496, 1454, 1365, 1348, 1248, 1210, 1157, 1095, 1051, 984, 735, 696, 654, 461.

HRMS-ESI (m/z): [M+Na]<sup>+</sup> calcd. for [C<sub>36</sub>H<sub>44</sub>NaN<sub>4</sub>O<sub>9</sub>]<sup>+</sup>, 699.3001, found 699.2992.

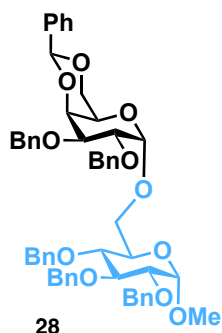

General Procedure B: 134 mg, 75%,  $\alpha:\beta = 20:1$

Data for  $\alpha$  anomer **28**:

TLC:  $R_f = 0.35$  (hexane/AcOEt = 4:1)

$^1\text{H}$  NMR (500 MHz,  $\text{CDCl}_3$ ):

$\delta$  7.53-7.51 (m, 2H), 7.39-7.21 (m, 28H), 5.46 (s, 1H), 5.06 (d,  $J = 3.5$  Hz, 1H), 4.99 (d,  $J = 10.5$  Hz, 1H), 4.90 (d,  $J = 11.5$  Hz, 1H), 4.82-4.68 (m, 7H), 4.61-4.53 (m, 3H), 4.13-4.10 (m, 2H), 4.07 (dd,  $J = 10.0, 3.5$  Hz, 1H), 3.99 (t,  $J = 9.5$  Hz, 1H), 3.95 (dd,  $J = 10.5, 7.5$  Hz, 1H), 3.88 (d,  $J = 10.0, 3.5$  Hz, 1H), 3.78-3.69 (m, 3H), 3.58 (t,  $J = 10.0, 3.5$  Hz, 1H), 3.49 (s, 1H), 3.45 (dd,  $J = 9.5, 3.5$  Hz, 1H), 3.3 (s, 3H).

$^{13}\text{C}$  NMR (125 MHz,  $\text{CDCl}_3$ ):

$\delta$  138.85, 138.78, 138.66, 138.50, 138.15, 137.83, 128.82, 128.39, 128.34, 128.25, 128.06, 127.96, 127.82, 127.73, 127.56, 127.50, 127.48, 127.37, 126.34, 101.03, 98.35, 97.86, 82.09, 80.12, 77.99, 75.66, 75.61, 74.90, 74.80, 73.32, 72.81, 71.84, 70.11, 69.34, 66.43, 62.58, 54.97.

IR ( $\text{cm}^{-1}$ ): 3030, 2917, 1496, 1453, 1358, 1249, 1211, 1130, 1069, 1049, 1026, 996, 917, 831, 795, 734, 694, 614, 558, 505, 461.

HRMS-ESI ( $m/z$ ):  $[\text{M}+\text{Na}]^+$  calcd. for  $[\text{C}_{55}\text{H}_{58}\text{NaO}_{11}]^+$ , 917.3871, found 917.3867.

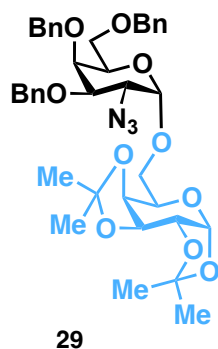

General Procedure B: 116 mg, 81%,  $\alpha:\beta > 20:1$

Data for  $\alpha$  anomer **29**:

TLC:  $R_f = 0.40$  (hexane/AcOEt = 4:1)

$^1\text{H}$  NMR (500 MHz,  $\text{CDCl}_3$ ):

$\delta$  7.36-7.28 (m, 15H), 5.52 (d,  $J = 5.0$  Hz, 1H), 4.97 (d,  $J = 4.0$  Hz, 1H), 4.88 (d,  $J = 11.5$  Hz, 1H), 4.74 (d,  $J = 11.5$  Hz, 1H), 4.68 (d,  $J = 11.0$  Hz, 1H), 4.61 (dd,  $J = 7.5, 2.5$  Hz, 1H), 4.56-4.43 (m, 3H), 4.32-4.29 (m, 2H), 4.10-3.99 (m, 4H), 3.85-3.81 (m, 2H), 3.70 (dd,  $J = 10, 5.5$  Hz, 1H), 3.62 (t,  $J = 9.5$  Hz, 1H), 3.55 (dd,  $J = 9.0, 5.5$  Hz, 1H), 1.54 (s, 3H), 1.42 (s, 3H), 1.34 (s, 3H), 1.33 (s, 3H).

$^{13}\text{C}$  NMR (125 MHz,  $\text{CDCl}_3$ ):

$\delta$  138.32, 137.88, 137.60, 128.75, 128.44, 128.36, 128.21, 128.07, 127.80, 127.70, 127.61, 109.24, 108.53, 98.33, 96.22, 74.77, 73.32, 72.08, 70.93, 70.56, 69.29, 68.33, 66.87, 66.45, 59.67, 26.03, 25.90, 24.93, 24.34.

IR ( $\text{cm}^{-1}$ ): 2923, 2107, 1725, 1496, 1454, 1381, 1309, 1255, 1209, 1165, 1115, 1095, 1066, 1003, 918, 889, 865, 734, 696, 650, 599, 506, 462, 429.

HRMS-ESI ( $m/z$ ):  $[\text{M}+\text{Na}]^+$  calcd. for  $[\text{C}_{39}\text{H}_{47}\text{NaN}_3\text{O}_{10}]^+$ , 740.3154, found 740.3143.

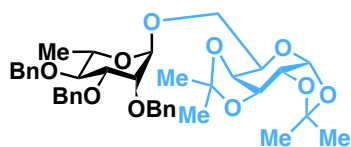

30

General Procedure B: 111 mg, 82%,  $\alpha:\beta > 20:1$

Data for  $\alpha$  anomer **30**:

TLC:  $R_f = 0.45$  (hexane/AcOEt = 5:1)

$^1\text{H}$  NMR (500 MHz,  $\text{CDCl}_3$ ):

$\delta$  7.43–7.28 (m, 15H), 5.55 (d,  $J = 5.0$  Hz, 1 H), 4.96 (d,  $J = 11$  Hz, 1 H), 4.93 (d,  $J = 1.5$  Hz, 1H), 4.77 (s, 2H), 4.69–4.60 (m, 4H), 4.33 (q,  $J = 2.5$  Hz, 1H), 4.19 (dd,  $J = 7.5, 1.5$  Hz, 1H), 3.95–3.78 (m, 5H), 3.66 (t,  $J = 9.5$  Hz, 1H), 3.61 (dd,  $J = 7.0, 3.5$  Hz, 1H), 1.55 (s, 3H), 1.47 (s, 3H), 1.36 (s, 6H), 1.35 (d,  $J = 6.0$  Hz, 3H).

$^{13}\text{C}$  NMR (125 MHz,  $\text{CDCl}_3$ ):

$\delta$  138.65, 138.50, 138.33, 128.19, 127.96, 127.80, 127.52, 127.46, 127.35, 109.18, 108.43, 97.90, 96.14, 79.85, 75.11, 74.63, 72.48, 71.82, 71.04, 70.50, 70.43, 67.96, 67.14, 65.81, 26.05, 25.88, 24.87, 24.30.

IR ( $\text{cm}^{-1}$ ): 2986, 2932, 1496, 1454, 1381, 1254, 1209, 1167, 1063, 1027, 1000, 917, 900, 801, 734, 696, 647, 511, 457.

HRMS-ESI ( $m/z$ ):  $[\text{M}+\text{Na}]^+$  calcd. for  $[\text{C}_{39}\text{H}_{48}\text{NaO}_{10}]^+$ , 699.3140, found 699.3129.

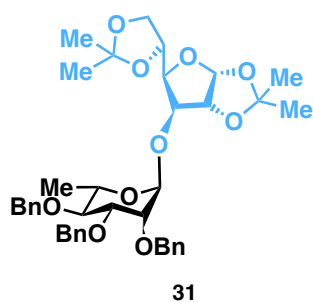

General Procedure B: 105 mg, 78%,  $\alpha:\beta > 20:1$

Data for  $\alpha$  anomer **31**:

TLC:  $R_f = 0.45$  (hexane/AcOEt = 5:1)

$^1\text{H}$  NMR (500 MHz,  $\text{CDCl}_3$ ):

$\delta$  7.40-7.27 (m, 15H), 5.77 (d,  $J = 4.0$  Hz, 1H), 4.93 (d,  $J = 11.0$  Hz, 1H), 4.86 (d,  $J = 12.0$  Hz, 1H), 4.76 (d,  $J = 1.5$  Hz, 1H), 4.67-4.64 (m, 4H), 4.28 (d,  $J = 3.5$  Hz, 1H), 4.19-4.15 (m, 2H), 4.09-4.06 (m, 2H), 3.99-3.96 (m, 1H), 3.90 (dd,  $J = 8.5, 6.0$  Hz, 1H), 3.75 (dd,  $J = 9.0, 3.0$  Hz, 1H), 3.69 (m, 1H), 3.60 (t,  $J = 10.0$  Hz, 1H), 1.49 (s, 3H), 1.38 (s, 3H), 1.31 (s, 1H), 1.28 (d,  $J = 6.0$  Hz, 3H), 1.28 (s, 3H).

$^{13}\text{C}$  NMR (125 MHz,  $\text{CDCl}_3$ ):

$\delta$  138.94, 138.37, 138.18, 128.37, 128.32, 128.18, 128.16, 127.78, 127.71, 127.58, 127.49, 127.35, 111.87, 109.16, 105.14, 95.86, 81.68, 80.90, 80.22, 79.78, 76.61, 75.20, 74.82, 73.30, 72.48, 71.89, 68.50, 67.76, 26.70, 26.15, 25.19, 17.62.

IR ( $\text{cm}^{-1}$ ): 3029, 2916, 1496, 1453, 1371, 1355, 1208, 1131, 1091, 1072, 1025, 911, 847, 733, 695, 532, 459.

HRMS-ESI ( $m/z$ ):  $[\text{M}+\text{Na}]^+$  calcd. for  $[\text{C}_{39}\text{H}_{48}\text{NaO}_{10}]^+$ , 699.3140, found 699.3124.

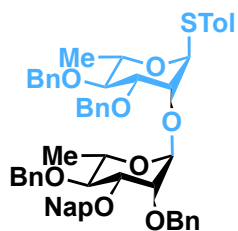

32

General Procedure B: 141 mg, 78%,  $\alpha:\beta = 20:1$

Data for  $\alpha$  anomer **32**:

TLC:  $R_f = 0.45$  (hexane/AcOEt = 5:1)

$^1\text{H}$  NMR (500 MHz,  $\text{CDCl}_3$ ):

$\delta$  7.69-7.60 (m, 4H), 7.34-7.30 (m, 2H), 7.25-7.09 (m, 23H), 6.98 (d,  $J = 10.0$  Hz, 2H), 5.23 (d,  $J = 1.0$  Hz, 1H), 5.00 (d,  $J = 1.0$  Hz, 1H), 4.86 (m, 1H), 4.69-4.62 (m, 3H), 4.55-4.51 (m, 4H), 4.46 (t,  $J = 12.5$  Hz, 1H), 4.37-4.35 (m, 1H), 4.13 (s, 1H), 3.98-3.94 (m, 1H), 3.82 (dd,  $J = 9.5, 3.0$  Hz, 1H), 3.74-3.70 (m, 2H), 3.67-3.64 (m, 1H), 3.54 (t,  $J = 9.0$  Hz, 1H), 3.17 (t,  $J = 9.0$  Hz, 1H), 2.2 (s, 3H), 1.17 (d,  $J = 6.0$  Hz, 3H), 1.07 (d,  $J = 6.0$  Hz, 3H).

$^{13}\text{C}$  NMR (125 MHz,  $\text{CDCl}_3$ ):

$\delta$  138.51, 138.34, 138.22, 137.91, 137.40, 136.02, 133.20, 132.86, 131.71, 130.62, 129.78, 128.48, 128.35, 128.31, 128.19, 127.91, 127.68, 127.72, 127.60, 127.57, 127.51, 126.31, 125.97, 125.76, 99.41, 87.61, 80.58, 80.30, 80.10, 79.05, 75.91, 75.29, 75.19, 75.00, 74.87, 72.70, 72.46, 72.20, 69.16, 68.81, 68.57, 68.24, 21.03, 17.91, 17.71.

IR ( $\text{cm}^{-1}$ ): 3029, 2910, 1731, 1602, 1494, 1453, 1364, 1282, 1208, 1086, 1060, 1026, 911, 843, 810, 733, 696, 620, 474.

HRMS-ESI ( $m/z$ ):  $[\text{M}+\text{Na}]^+$  calcd. for  $[\text{C}_{58}\text{H}_{60}\text{NaSO}_8]^+$ , 939.3901, found 939.3904.



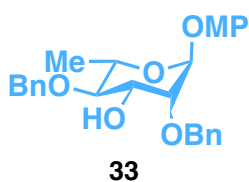

Prepared according to the method of P.B. Mukhopadhyay<sup>1</sup>

1.35g, 68% yield

Data for compound **33**:

TLC:  $R_f = 0.45$  (hexane/AcOEt = 1:1)

<sup>1</sup>H NMR (500 MHz, CDCl<sub>3</sub>):

$\delta$  7.38-7.27 (m, 5H), 6.99-6.97 (m, 2H), 6.85-6.82 (m, 2H), 5.40 (s, 1H), 4.79-4.74 (m, 2H), 4.14-4.10 (m, 2H), 3.90-3.86 (dq, 1H,  $J = 9.4, 6.1$  Hz), 3.78 (s, 3H), 3.43 (t,  $J = 9.4$  Hz, 1H), 2.50 (br s, 1H), 2.38 (br s, 1H), 1.33 (d,  $J = 6.1$  Hz, 3H).

<sup>13</sup>C NMR (125 MHz, CDCl<sub>3</sub>):

$\delta$  154.90, 150.19, 138.15, 128.67, 128.07, 127.95, 117.54, 114.59, 98.07, 81.58, 75.10, 71.26, 71.04, 67.86, 55.63, 18.02.

IR (cm<sup>-1</sup>): 3011, 2917, 1637, 1496, 1453, 1360, 1215, 1067, 1027, 803, 696, 665, 471, 422.

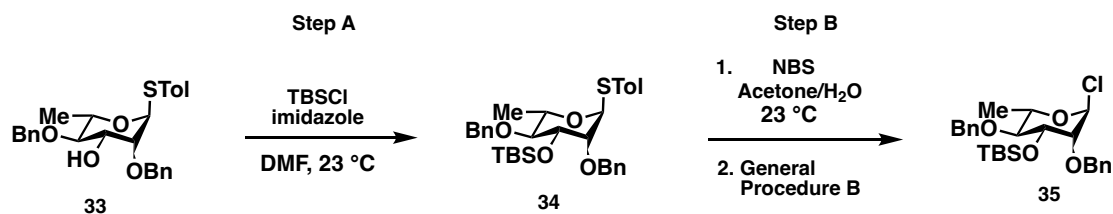

Step A: To a stirred solution of **33** (2.5g, 5.6 mmol, 1.0 equiv.) in DMF at 23°C was added imidazole (1.13 g, 16.8 mmol, 3.0 equiv.) followed by TBSCl (1.25g, 8.3 mmol, 1.5 equiv.). After 12 hours, the reaction was diluted with brine, and extracted three times with ethyl acetate. The combined organic layers were dried over sodium sulfate and concentrated *in vacuo*. Silica gel chromatography eluting with 5% EtOAc in hexanes furnished compound **34** (2.49g) 78% yield.

Data for **34**:

TLC:  $R_f = 0.50$  (hexane/AcOEt = 9:1)

$^1\text{H}$  NMR (500 MHz,  $\text{CDCl}_3$ ):

$\delta$ 7.39-7.29 (m, 12H), 7.10 (d,  $J = 8.0$  Hz, 2H), 5.40 (s, 1H), 4.93 (d,  $J = 11.0$  Hz, 1H), 4.78-4.61 (m, 3H), 4.16-4.13 (m, 1H), 4.08-4.05 (m, 1H), 3.88 (s, 1H), 3.60-3.57 (m, 1H), 2.33 (s, 3H), 1.30 (d,  $J = 6.0$  Hz, 3H), 0.98 (s, 9H), 0.21 (s, 6H).

$^{13}\text{C}$  NMR (125 MHz,  $\text{CDCl}_3$ ):

$\delta$ 138.58, 138.26, 137.39, 131.85, 131.01, 129.76, 128.30, 128.27, 127.75, 127.67, 127.59, 127.47, 86.63, 81.42, 80.96, 75.35, 73.53, 72.87, 69.47, 25.99, 21.07, 18.06, 17.84, -4.39, -4.66.

IR ( $\text{cm}^{-1}$ ): 3030, 2915, 1496, 1453, 1362, 1208, 1141, 1070, 1026, 911, 841, 788, 733, 694, 655, 612, 545, 484, 458.

Step B: To a stirred solution of **34** (2.49g, 4.4 mmol, 1.0 equiv.) in 5:1 acetone:water (24 ml) at 23°C was added NBS (2.36g, 13.2 mmol, 3.0 equiv.) portion-wise over 10 minutes. At 2 hours the reaction was quenched with saturated aqueous  $\text{Na}_2\text{S}_2\text{O}_3$  and extracted with ethyl acetate. The combined organic layers were washed with brine, dried over sodium sulfate and concentrated *in vacuo*. The crude material (1.7 g, 3.7 mmol, 1.0 equiv.) was subjected to General Procedure B. Following silica gel plug filtration – 10:1 hexanes:ethyl acetate, **35** was obtained (1.5 g), in 85% yield. This compound had limited stability and was used immediately following NMR analysis.

Data for **35**:

TLC:  $R_f = 0.50$  (hexane/AcOEt = 12:1)

$^1\text{H}$  NMR (500 MHz,  $\text{CDCl}_3$ ):

$\delta$ 7.44-7.32 (m, 10H), 6.05 (s, 1H), 5.00-4.88 (m, 2H), 4.73-4.66 (m, 2H), 4.45-4.42 (m, 1H), 4.03-3.99 (m, 1H), 3.85-3.84 (m, 1H), 3.66-3.61 (m, 1H), 1.35 (d,  $J = 6.5$  Hz, 3H), 1.03 (s, 9H), 0.19 (s, 6H).

$^{13}\text{C}$  NMR (125 MHz,  $\text{CDCl}_3$ ):

$\delta$ 138.24, 137.88, 128.41, 128.26, 128.08, 127.98, 127.84, 127.64, 127.54, 92.08, 82.15, 80.47, 75.37, 73.79, 71.57, 71.33, 25.92, 17.54, -4.49, -4.74.

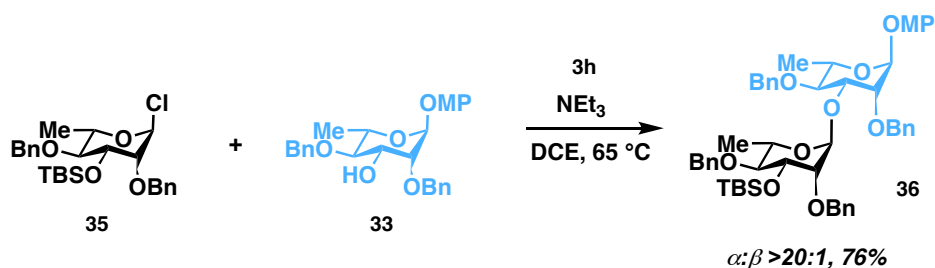

General Procedure B: 1.11 mmol scale, 711 mg, 76%,  $\alpha:\beta > 20:1$

Data for **36**:

TLC:  $R_f = 0.45$  (hexane/AcOEt = 4:1)

$^1\text{H}$  NMR (500 MHz,  $\text{CDCl}_3$ ):

$\delta$  7.49 (d,  $J = 7.5$  Hz, 2H), 7.39-7.29 (m, 18H), 7.01 (d,  $J = 9.0$  Hz, 2H), 6.86 (d,  $J = 9.0$  Hz, 2H), 5.46 (d,  $J = 1.5$  Hz, 1H), 5.26 (s, 1H), 4.98 (d,  $J = 11.0$  Hz, 1H), 4.84-4.66 (m, 6H), 4.45 (d,  $J = 11.0$  Hz, 1H), 4.36 (dd,  $J = 9.5, 2.0$  Hz, 1H), 4.27 (dd,  $J = 9.5, 2.0$  Hz, 1H), 4.00 (t,  $J = 2.0$  Hz, 1H), 3.95-3.89 (m, 1H), 3.80 (s, 3H), 3.75-3.73 (m, 1H), 3.61 (t,  $J = 9.0$  Hz, 1H), 1.32 (d,  $J = 6.0$  Hz, 3H), 1.31 (d,  $J = 6.0$  Hz, 3H), 1.00 (s, 9H), -0.15 (s, 3H), -0.14 (s, 3H).

$^{13}\text{C}$  NMR (125 MHz,  $\text{CDCl}_3$ ):

$\delta$  154.78, 150.27, 138.84, 138.62, 138.33, 137.96, 128.46, 128.39, 128.12, 127.70, 127.63, 127.57, 127.30, 127.23, 127.02, 117.50, 114.51, 100.43, 96.56, 81.28, 80.66, 80.00, 78.07, 74.97, 74.85, 73.22, 73.18, 72.86, 69.94, 68.81, 55.56, 25.96, 18.03, 17.93, -4.36, -4.71.

IR ( $\text{cm}^{-1}$ ): 2927, 2854, 1506, 1453, 1386, 1360, 1266, 1249, 1214, 1124, 1095, 1049, 1028, 1003, 927, 870, 835, 796, 776, 732, 695, 611, 520, 459, 427.

HRMS-ESI ( $m/z$ ):  $[\text{M}+\text{NH}_4]^+$  calcd. for  $[\text{C}_{53}\text{H}_{70}\text{NO}_{10}\text{Si}]^+$ , 908.4769, found 908.4763.

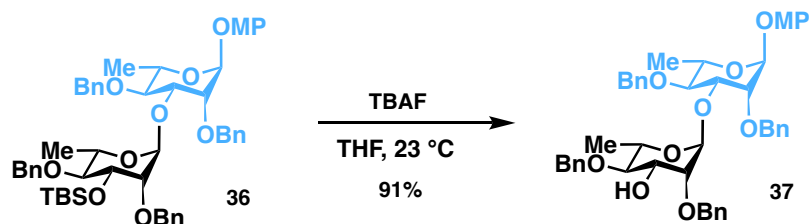

To a stirred solution of **36** (700 mg, 0.79 mmol, 1.0 equiv.) in THF (5 mL) at 23 °C was added a solution of TBAF (1.0 M in THF, 1.58 mL, 2.0 equiv.) dropwise. After 6 h, the reaction was diluted with ethyl acetate and sequentially washed with water then brine. The organic layer was dried over sodium sulfate and concentrated *in vacuo*. Silica gel chromatography (5:1 hexanes:ethyl acetate) furnished **37** (550 mg) in 92% yield.

Data for **37**:

TLC:  $R_f = 0.30$  (hexane/AcOEt = 4:1)

$^1\text{H NMR}$  (500 MHz,  $\text{CDCl}_3$ ):

$\delta$ 7.46-7.30 (m, 16H), 7.29-7.28 (m, 2H), 7.21 (d,  $J = 7.0$  Hz, 2H), 7.01 (d,  $J = 9.0$  Hz, 2H), 6.86 (d,  $J = 9.0$  Hz, 2H), 5.43 (s, 1H), 5.32 (s, 1H, H-1), 4.97 (d,  $J = 11.0$  Hz, 1H), 4.87-4.78 (m, 4H), 4.70 (d,  $J = 11.0$  Hz, 1H), 4.42-4.36 (m, 2H), 4.20-4.18 (m, 1H), 4.08 (bs, 1H), 3.96-3.88 (m, 3H), 3.80 (s, 3H), 3.77-3.73 (m, 2H), 3.40 (t,  $J = 9.5$  Hz, 1H), 1.36 (d,  $J = 6.0$  Hz, 3H), 1.35 (d,  $J = 6.0$  Hz, 3H).

$^{13}\text{C NMR}$  (125 MHz,  $\text{CDCl}_3$ ):

$\delta$ 154.78, 150.21, 138.68, 138.37, 137.77, 137.69, 128.42, 128.37, 128.22, 128.23, 127.71, 127.67, 127.53, 127.48, 126.74, 117.50, 114.50, 98.79, 96.66, 82.11, 80.83, 79.04, 77.61, 77.47, 74.77, 72.84, 72.41, 71.56, 68.90, 67.79, 55.53, 17.99, 17.94.

IR ( $\text{cm}^{-1}$ ): 2932, 1735, 1506, 1453, 1372, 1215, 1135, 1093, 1027, 920, 827, 733, 696, 634, 607, 518, 459, 436.

HRMS-ESI ( $m/z$ ):  $[\text{M}+\text{NH}_4]^+$  calcd. for  $[\text{C}_{47}\text{H}_{56}\text{NO}_{10}]^+$ , 794.3904, found 794.3895.

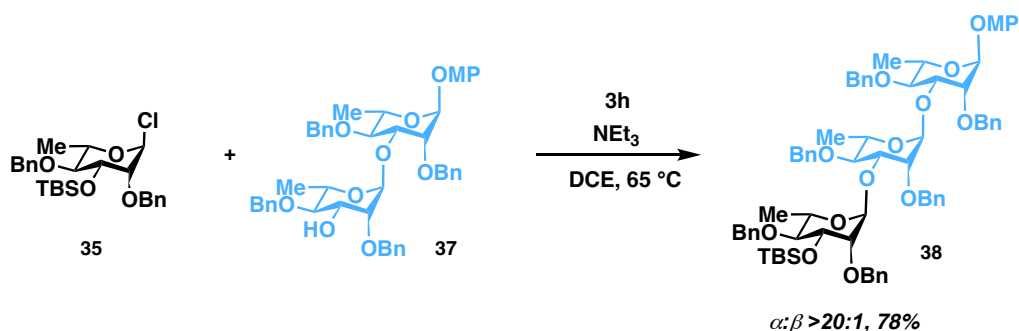

General Procedure B: 0.64 mmol scale, 305 mg, 78% yield.  $\alpha:\beta > 20:1$

Data for **38**:

TLC:  $R_f = 0.30$  (hexane/AcOEt = 4:1)

$^1\text{H}$  NMR (500 MHz,  $\text{CDCl}_3$ ):

$\delta$  7.47 (d,  $J = 7.0$  Hz, 2H), 7.37-7.25 (m, 28H), 6.98 (d,  $J = 9.5$  Hz, 2H), 6.84 (d,  $J = 9.5$  Hz, 2H), 5.43 (d,  $J = 1.5$  Hz, 1H), 5.28 (s, 1H), 5.16 (d,  $J = 1.0$  Hz, 1H), 4.93 (d,  $J = 11.5$  Hz, 1H), 4.82-4.61 (m, 8H), 4.44 (s, 2H), 4.40-4.37 (d,  $J = 12.0$  Hz, 1H), 4.33 (dd,  $J = 9.5, 3.0$  Hz, 1H), 4.23 (dd,  $J = 9.5, 3.0$  Hz, 1H), 4.20 (dd,  $J = 9.5, 3.0$  Hz, 1H), 3.96 (t,  $J = 2.0$  Hz, 1H), 3.90-3.83 (m, 4H), 3.79 (s, 3H), 3.73-3.63 (m, 3H), 3.55 (t,  $J = 9.0$  Hz, 1H), 1.28 (d,  $J = 6.5$  Hz, 6H), 1.20 (d,  $J = 6.5$  Hz, 3H), 0.95 (s, 9H), 0.09 (s, 3H), 0.08 (s, 3H).

$^{13}\text{C}$  NMR (125 MHz,  $\text{CDCl}_3$ ):

$\delta$  154.81, 150.28, 138.89, 138.65, 138.62, 138.30, 138.13, 137.89, 128.49, 128.40, 128.31, 128.12, 128.09, 127.74, 127.72, 127.59, 127.43, 127.31, 127.23, 127.19, 127.07, 126.83, 117.52, 114.53, 100.51, 99.62, 96.50, 81.28, 80.66, 80.58, 80.01, 78.93, 78.56, 78.19, 77.94, 74.88, 74.63, 73.24, 72.84, 72.35, 68.87, 68.4, 68.73, 55.60, 25.96, 18.12, 17.97, 17.93, 18.0, -4.40, -4.73.

IR ( $\text{cm}^{-1}$ ): 2928, 2856, 1508, 1497, 1453, 1386, 1360, 1288, 1252, 1213, 1094, 1041, 1027, 921, 868, 835, 801, 776, 732, 695, 613, 562, 518, 489, 478, 459.

HRMS-ESI ( $m/z$ ):  $[\text{M}+\text{NH}_4]^+$  calcd. for  $[\text{C}_{73}\text{H}_{92}\text{NO}_{14}\text{Si}]^+$ , 1234.6287, found 1234.6280.

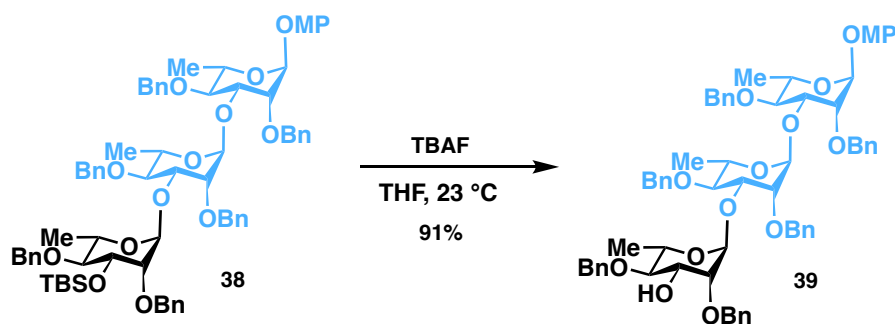

To a stirred solution of **38** (230 mg, 0.19 mmol, 1.0 equiv.) in THF (3 mL) at 23 °C was added a solution of TBAF (1.0 M THF, 0.38 mL, 0.38 mmol, 2.0 equiv.) dropwise. After 6 h, the reaction was diluted with ethyl acetate and sequentially washed with water then brine. The organic layer was dried over sodium sulfate and concentrated *in vacuo*. Silica gel chromatography (7:1 hexanes:ethyl acetate) furnished **39** (190 mg) in 91% yield.

Data for **39**:

TLC:  $R_f = 0.25$  (hexane/AcOEt = 4:1)

$^1\text{H NMR}$  (500 MHz,  $\text{CDCl}_3$ ):

$\delta$ 7.45 (d,  $J = 7.5$  Hz, 2H), 7.35-7.18 (m, 26H), 7.13 (d,  $J = 6.5$  Hz, 2H), 6.95 (d,  $J = 9.5$  Hz, 2H), 6.81 (d,  $J = 9.5$  Hz, 2H), 5.40 (d,  $J = 1.5$  Hz, 2H), 5.22 (s, 1H), 5.19 (s, 1H), 4.87 (d,  $J = 12.0$  Hz, 1H), 4.82-6.0 (m, 7H), 4.44-4.42 (m, 2H), 4.39-4.27 (m, 2H), 4.22 (dd,  $J = 10.0, 3.0$ , Hz, 1H), 4.10-4.08 (m, 1H), 3.98-3.78 (m, 5H), 3.77-3.75 (m, 4H), 3.69-3.61 (m, 3H), 3.31 (t,  $J = 9.0$  Hz, 1H), 2.25 (d,  $J = 9.5$  Hz, 1H), 1.28 (d,  $J = 6.5$  Hz, 3H), 1.24 (d,  $J = 6.5$  Hz, 3H), 1.20 (d,  $J = 6.5$  Hz, 3H).

$^{13}\text{C NMR}$  (125 MHz,  $\text{CDCl}_3$ ):

$\delta$ 154.82, 150.30, 138.75, 138.65, 138.24, 137.98, 137.76, 128.49, 128.42, 128.36, 128.29, 128.26, 127.75, 127.66, 127.50, 127.33, 127.12, 126.61, 117.54, 114.55, 99.70, 98.85, 96.44, 82.17, 80.89, 80.57, 79.12, 78.54, 78.26, 78.07, 74.89, 74.69, 74.48, 72.82, 72.45, 72.36, 71.51, 68.83, 67.71, 55.61, 18.13, 18.03, 17.94.

IR ( $\text{cm}^{-1}$ ): 2917, 1506, 1497, 1453, 1386, 1360, 1288, 1252, 1213, 1094, 1041, 1027, 921, 868, 835, 801, 776, 732, 695, 613, 562, 518, 489, 478, 459.

HRMS-ESI ( $m/z$ ):  $[\text{M}+\text{NH}_4]^+$  calcd. for  $[\text{C}_{67}\text{H}_{78}\text{NO}_{14}]^+$ , 1120.5422, found 1120.5413.

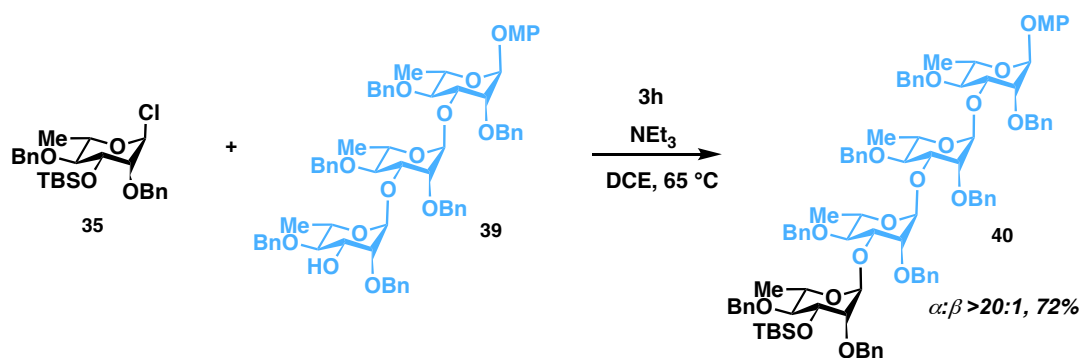

General Procedure B: 0.06 mmol scale, 70 mg, 72% yield.  $\alpha:\beta > 20:1$

Data for **40**:

TLC:  $R_f = 0.25$  (hexane/AcOEt = 4:1)

$^1\text{H}$  NMR (500 MHz,  $\text{CDCl}_3$ ):

$\delta$  7.45 (d,  $J = 7.5$  Hz, 2H), 7.35-7.20 (m, 38H), 6.96 (d,  $J = 9.5$  Hz, 2H), 6.82 (d,  $J = 9.5$  Hz, 2H), 5.40 (s, 1H), 5.25 (s, 1H), 5.18 (s, 1H), 5.11 (s, 1H), 4.90 (d,  $J = 12.0$  Hz, 1H), 4.82-4.55 (m, 9H), 4.48-4.45 (m, 1H), 4.39-4.29 (m, 5H), 4.20 (dd,  $J = 9.5, 3.0$  Hz, 1H), 4.17-4.13 (m, 2H), 3.94 (bs, 1H), 3.88-3.84 (m, 3H), 3.81-3.76 (m, 5H), 3.70-3.59 (m, 4H), 3.50 (t,  $J = 9.0$ , 1H), 1.27 (d,  $J = 6.5$  Hz, 3H), 1.26 (d,  $J = 6.5$  Hz, 3H), 1.15 (d,  $J = 6.5$  Hz, 6H).

$^{13}\text{C}$  NMR (125 MHz,  $\text{CDCl}_3$ ):

$\delta$  154.82, 150.31, 138.92, 138.67, 138.57, 138.30, 138.18, 138.05, 137.92, 128.49, 128.49, 128.42, 128.32, 128.28, 128.11, 128.09, 127.75, 127.72, 127.62, 127.46, 127.40, 127.34, 127.29, 127.25, 127.19, 127.06, 126.88, 126.76, 117.54, 114.55, 100.44, 99.75, 99.54, 96.46, 81.29, 80.70, 80.57, 80.03, 78.95, 78.80, 78.67, 78.47, 78.22, 78.02, 74.88, 74.66, 74.52, 73.19, 73.14, 72.85, 72.36, 72.30, 68.84, 68.81, 68.61, 55.62, 25.96, 18.10, 18.02, 17.98, 17.95, -4.40, -4.73.

IR ( $\text{cm}^{-1}$ ): 3030, 2920, 1726, 1702, 1493, 1453, 1365, 1314, 1274, 1206, 1085, 1026, 910, 844, 808, 795, 733, 695, 616, 485, 462, 426.

HRMS-ESI ( $m/z$ ):  $[\text{M}+\text{NH}_4]^+$  calcd. for  $[\text{C}_{93}\text{H}_{114}\text{NO}_{18}\text{Si}]^+$ , 1560.7805, found 1560.7800.

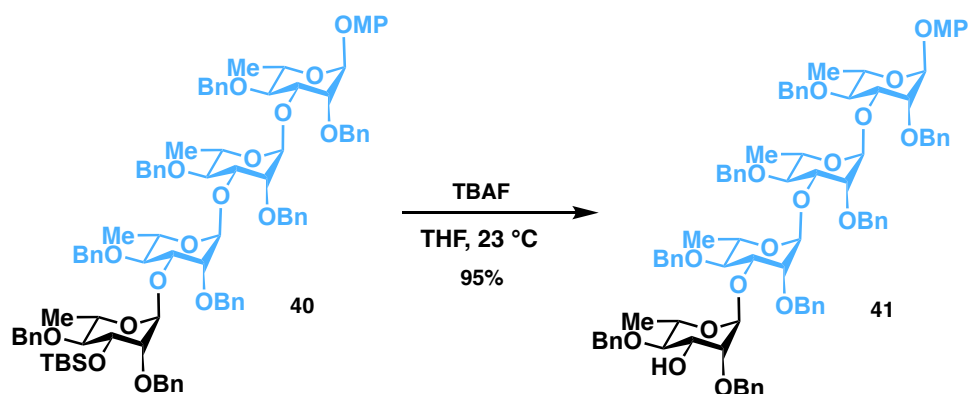

To a stirred solution of **40** (65 mg, 0.04 mmol, 1.0 equiv.) in THF (0.4 mL) at 23 °C was added a solution of TBAF (1.0 M THF, 0.08 mL, 0.08 mmol, 2.0 equiv.) dropwise. After 6 h, the reaction was diluted with ethyl acetate and sequentially washed with water then brine. The organic layer was dried over sodium sulfate and concentrated *in vacuo*. Silica gel chromatography (5:1 hexanes:ethyl acetate) furnished **41** (54 mg) in 95% yield.

Data for **41**:

TLC:  $R_f$  = 0.60 (hexane/AcOEt = 4:1)

$^1\text{H}$  NMR (500 MHz,  $\text{CDCl}_3$ ):

$\delta$ 7.44 (d,  $J$  = 7.5 Hz, 2H), 7.34-7.21 (m, 36H), 7.12 (d,  $J$  = 6.0 Hz, 2H), 6.96 (d,  $J$  = 9.0 Hz, 2H), 6.81 (d,  $J$  = 9.0 Hz, 2H), 5.40 (d,  $J$  = 1.5 Hz, 1H), 5.26 (s, 1H), 5.17 (s, 1H), 5.16 (s, 1H), 4.87 (d,  $J$  = 11.0 Hz, 1H), 4.81-4.60 (m, 7H), 4.47-4.45 (m, 1H), 4.39-4.27 (m, 5H), 4.19 (dd,  $J$  = 9.5, 2.5 Hz, 2H), 4.07-4.04 (m, 1H), 3.97-3.93 (m, 2H), 3.87-3.3.80 (m, 4H), 3.79-3.3.70 (m, 5H), 3.67-3.60 (m, 4H), 3.28 (t,  $J$  = 9.0 Hz, 1H), 2.25 (d,  $J$  = 9.5 Hz, 1H), 1.26 (d,  $J$  = 6.5 Hz, 3H), 1.25 (d,  $J$  = 6.5 Hz, 3H), 1.18 (d,  $J$  = 6.5 Hz, 3H), 1.17 (d,  $J$  = 6.5 Hz, 3H).

$^{13}\text{C}$  NMR (125 MHz,  $\text{CDCl}_3$ ):

$\delta$ 154.82, 150.30, 138.76, 138.67, 138.50, 138.33, 138.10, 138.00, 137.90, 137.77, 128.50, 128.42, 128.33, 128.27, 127.77, 127.71, 127.66, 127.49, 127.32, 127.30, 127.02, 126.93, 126.53, 117.54, 114.55, 99.83, 99.45, 98.79, 96.46, 82.18, 80.91, 80.59, 79.12, 78.92, 78.57, 78.20, 78.02, 77.80, 74.86, 74.69, 74.37, 72.86, 72.39, 72.24, 71.50, 68.85, 68.73, 67.68, 60.37 55.63, 18.10, 17.99, 17.95.

IR ( $\text{cm}^{-1}$ ): 2931, 1506, 1453, 1386, 1283, 1214, 1094, 1040, 1027, 918, 827, 733, 695, 606, 519, 459.

HRMS-ESI ( $m/z$ ):  $[\text{M}+\text{NH}_4]^+$  calcd. for  $[\text{C}_{87}\text{H}_{100}\text{NO}_{18}]^+$ , 1446.6940, found 1446.6934.



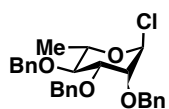

42

General Procedure D: 3.68 mmol scale, 1.51 g, 91% yield.

Data for **42**:

TLC:  $R_f = 0.60$  (hexane/AcOEt = 4:1)

$^1\text{H}$  NMR (500 MHz,  $\text{CDCl}_3$ ):

$\delta$  7.39-7.34 (m, 15H), 6.05 (d,  $J = 1.0$  Hz, 1H), 5.00 (d,  $J = 11.0$  Hz, 1H), 4.77-4.63 (m, 5H), 4.19 (dd,  $J = 9.5, 3.0$  Hz, 1H), 4.02 (p,  $J = 3.0$  Hz, 1H), 3.92 (d,  $J = 2.0$  Hz, 1H), 3.71 (d,  $J = 9.5$  Hz, 1H), 1.39 (d,  $J = 6.5$  Hz, 3H).

$^{13}\text{C}$  NMR (125 MHz,  $\text{CDCl}_3$ ):

$\delta$  138.22, 138.05, 137.55, 128.43, 128.37, 128.34, 127.94, 127.88, 127.74, 127.69, 91.58, 79.62, 78.23, 77.98, 75.44, 73.01, 72.40, 71.04, 53.36, 46.10, 17.56.

Characterization matches literature precedent<sup>2</sup>

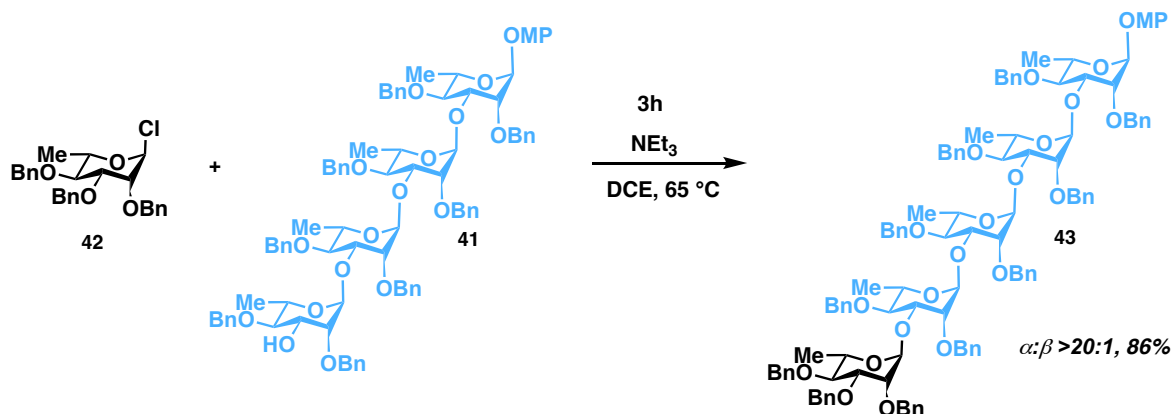

General Procedure B: 0.036 mmol, 57 mg, 86%,  $\alpha:\beta > 20:1$

Data for **43**:

TLC:  $R_f = 0.30$  (hexane/AcOEt = 4:1)

$^1\text{H}$  NMR (500 MHz,  $\text{CDCl}_3$ ):

$\delta$  7.46 (d,  $J = 7.5$  Hz, 2H), 7.36-7.18 (m, 53H), 6.97 (d,  $J = 9.0$  Hz, 2H), 6.83 (d,  $J = 9.0$  Hz, 2H), 5.41 (d,  $J = 1.5$  Hz, 1H), 5.26 (s, 1H), 5.18 (s, 1H), 5.14 (s, 1H), 5.13 (s, 1H), 4.95 (d,  $J = 11.0$  Hz, 1H), 4.80-4.74 (m, 4H), 4.72-4.59 (m, 6H), 4.56-4.50 (m, 3H), 4.47-4.42 (m, 4H), 4.41-4.30 (m, 4H), 4.21 (dd,  $J = 9.5, 3.0$  Hz, 1H), 4.17-4.13 (m, 2H), 3.95 (t,  $J = 2.5$  Hz, 1H), 3.88-3.86 (m, 4H), 3.85-3.76 (m, 9H), 3.73-3.59 (m, 4H), 3.57-3.51 (m, 1H), 1.27 (d,  $J = 6.5$  Hz, 6H,  $2^*\text{CH}_3$ ), 1.20 (d,  $J = 6.5$  Hz, 3H), 1.16 (d,  $J = 6.5$  Hz, 3H), 1.12 (d,  $J = 6.5$  Hz, 3H).

$^{13}\text{C}$  NMR (125 MHz,  $\text{CDCl}_3$ ):

$\delta$  154.82, 150.29, 138.92, 138.63, 138.54, 138.34, 138.30, 138.13, 138.06, 137.90, 128.49, 128.41, 128.30, 128.25, 128.21, 128.18, 128.14, 127.76, 127.70, 127.63, 127.56, 127.46, 127.37, 127.31, 127.27, 127.03, 126.84, 126.72, 117.53, 114.54, 99.64, 99.47, 96.45, 80.78, 80.62, 80.57, 80.43, 79.77, 78.83, 78.60, 78.22, 78.04, 75.70, 74.97, 74.86, 74.64, 74.56, 74.37, 72.85, 72.43, 72.27, 72.04, 68.85, 68.74, 68.65, 68.59, 55.62, 18.14, 18.03, 17.99, 17.95.

IR ( $\text{cm}^{-1}$ ): 2930, 1496, 1453, 1387, 1356, 1282, 1213, 1175, 1097, 1041, 1027, 1005, 919, 828, 731, 694, 611, 540, 477, 456, 432.

HRMS-ESI ( $m/z$ ):  $[\text{M}+\text{NH}_4]^+$  calcd. for  $[\text{C}_{114}\text{H}_{128}\text{NO}_{22}]^+$ , 1862.8923, found 1862.8911.

## 5. NMR Spectra

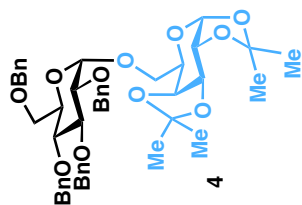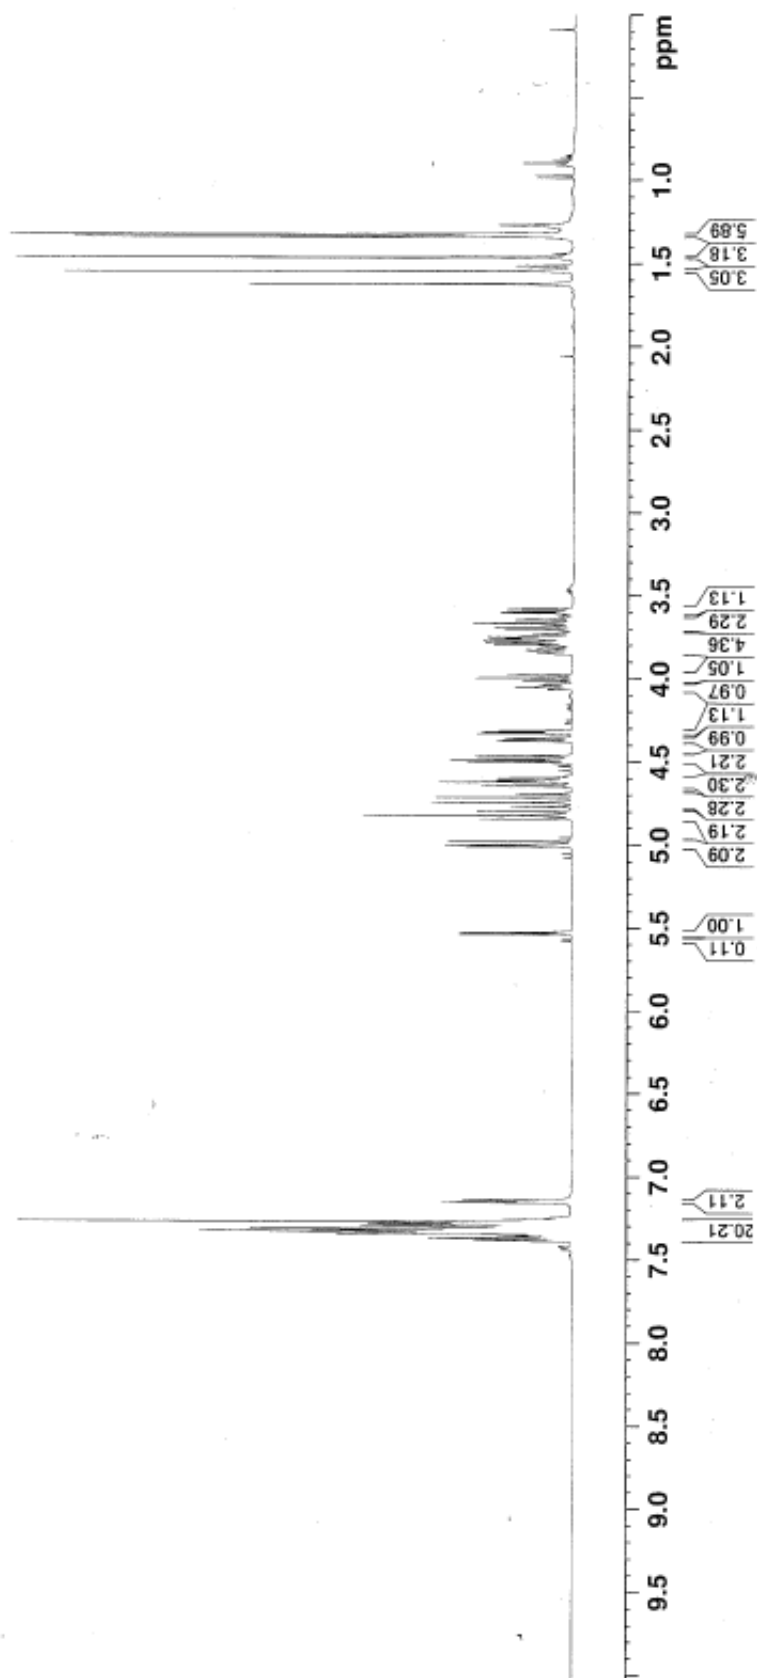

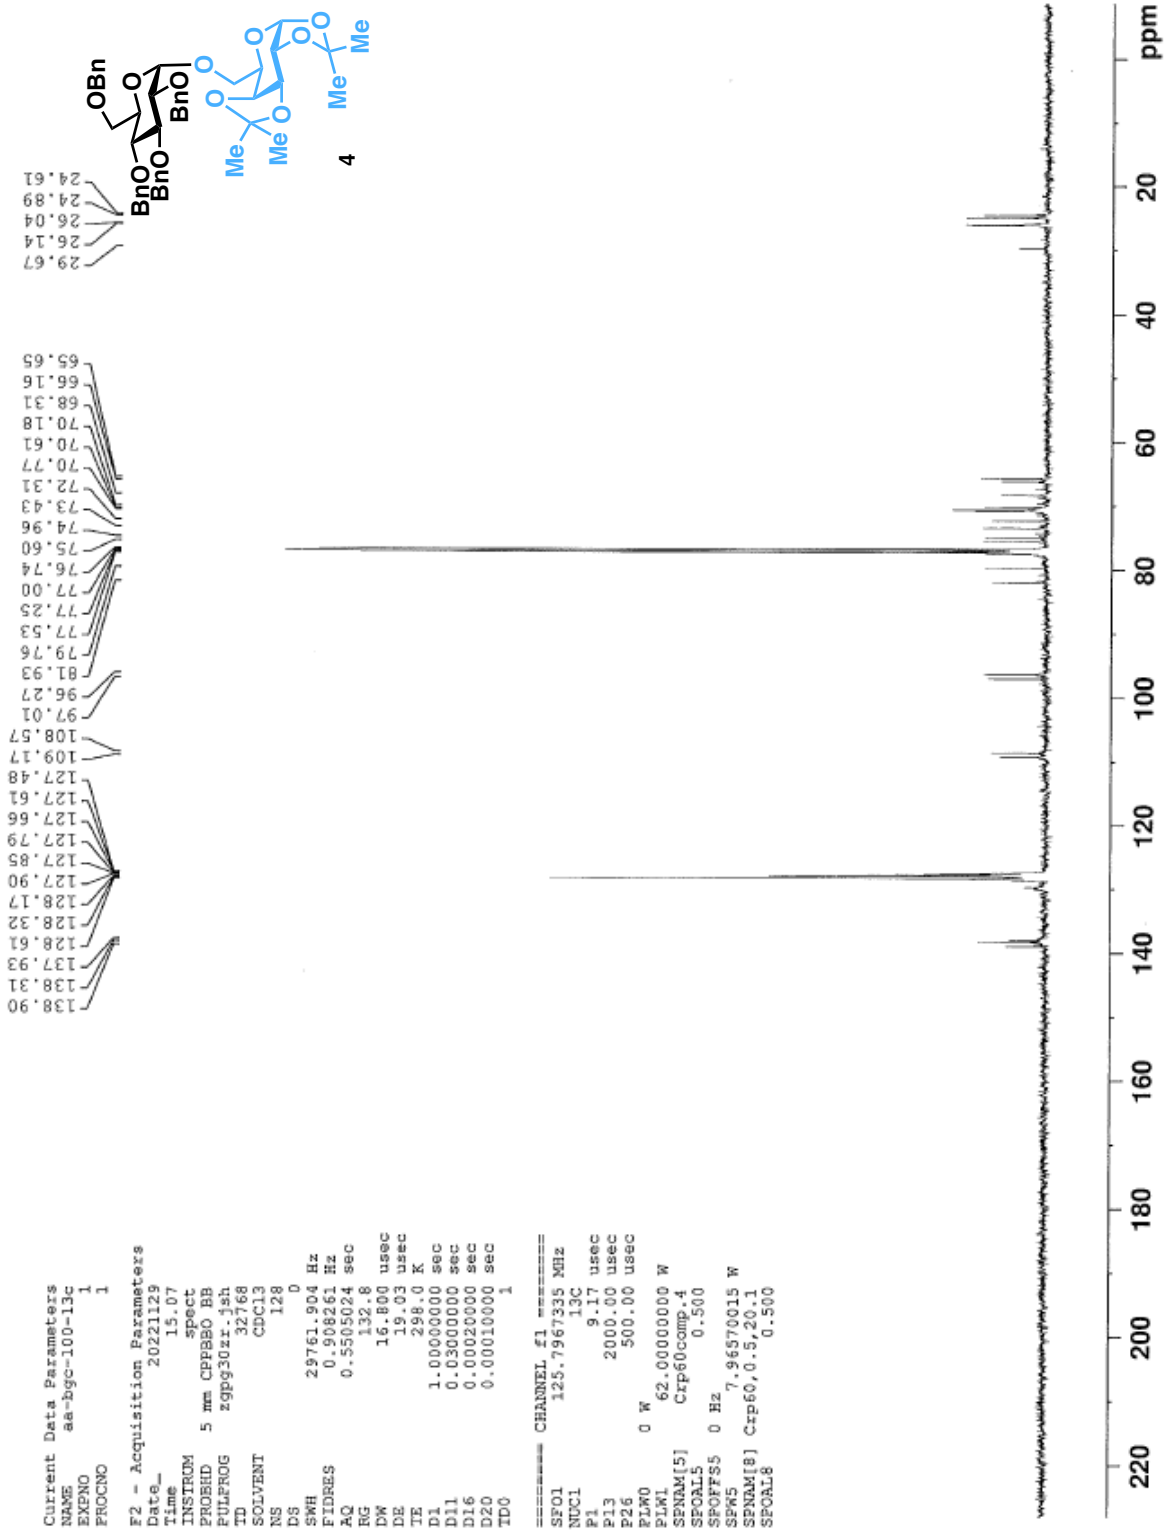

```

Current Data Parameters
NAME aa-bgc-100-13c
EXPNO 1
PROCNO 1

F2 - Acquisition Parameters
Date_ 20221129
Time 15.07
INSTRUM spect
PROBHD 5 mm CFPBBO BB
PULPROG zgpg30ar.fsh
ID 32768
SOLVENT CDCl3
NS 128
DS 0
SWH 23761.904 Hz
FIDRES 0.908261 Hz
AQ 0.5505024 sec
RG 132.8
DW 16.800 usec
DE 19.03 usec
TE 298.0 K
D1 1.00000000 sec
D11 0.03000000 sec
D16 0.00020000 sec
D20 0.00010000 sec
TD0 1

===== CHANNEL f1 =====
SFO1 125.7967335 MHz
NUC1 13C
P1 9.17 usec
P13 2000.00 usec
P26 500.00 usec
PLW0 0 W
PLW1 62.00000000 W
SFOAL5 Cfp60comp.4
SFOALS 0.500
SFOFF5 0 Hz
SFW5 7.96570015 W
SFOAL8 Cfp60.0.5.20.1
SFOALS 0.500

```

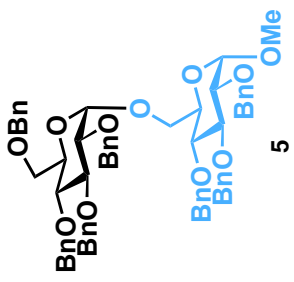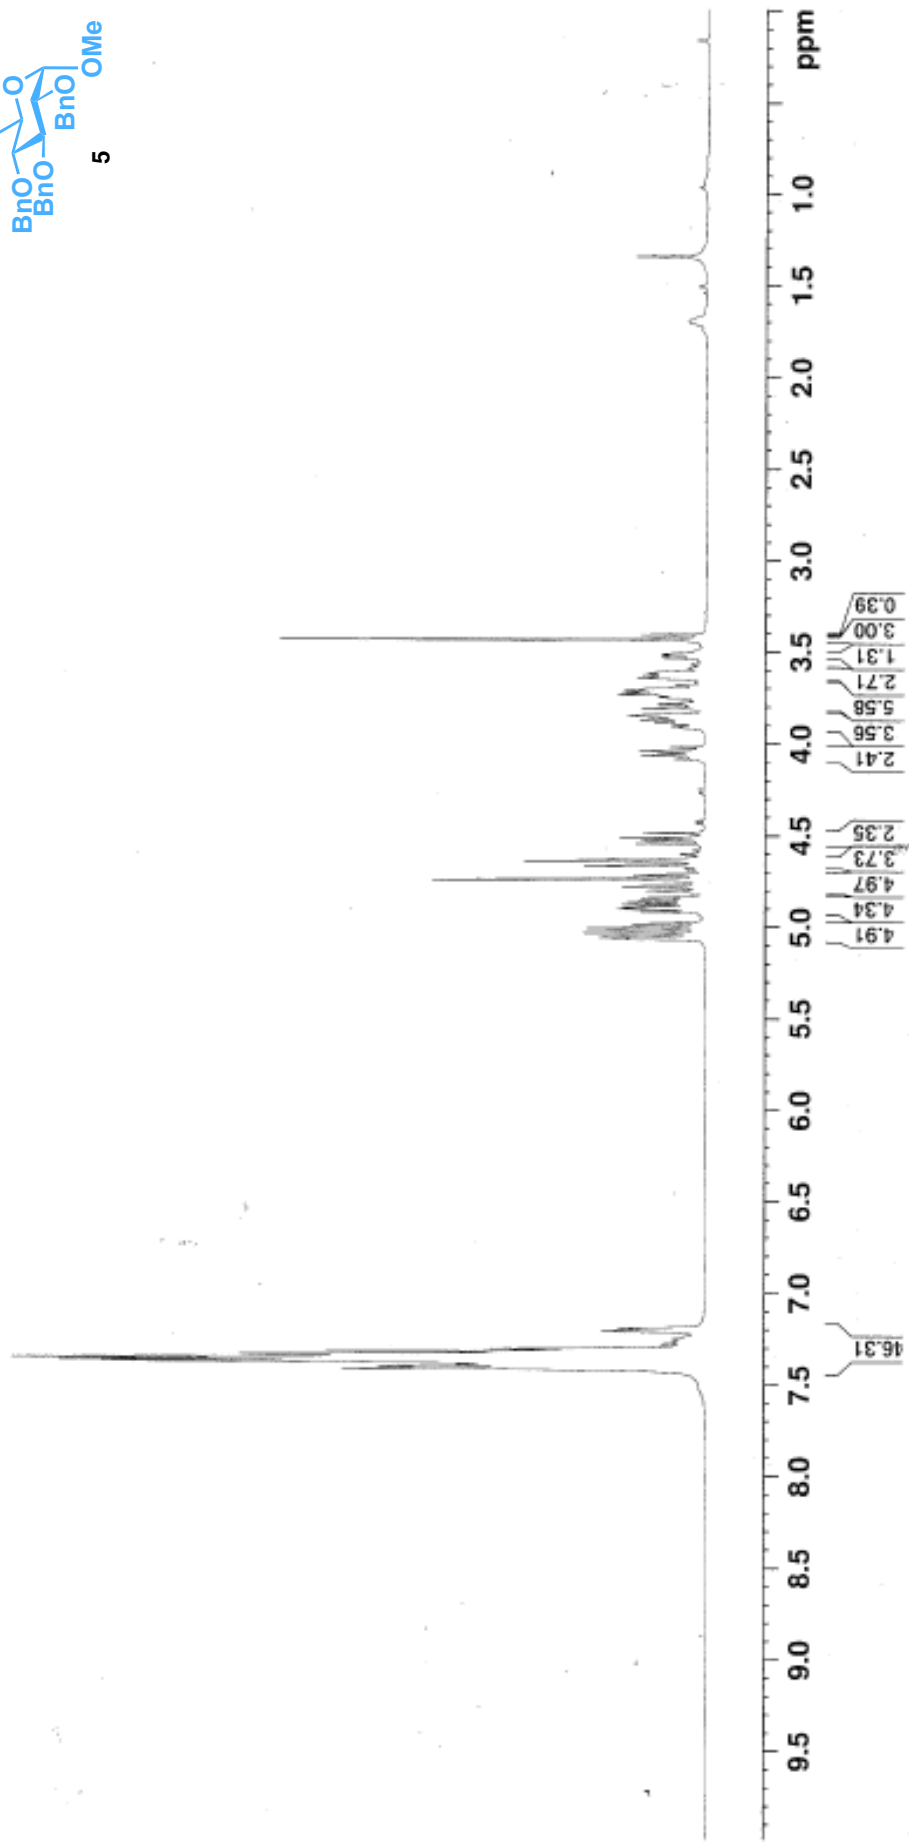

138.78  
 138.42  
 138.39  
 138.14  
 137.94  
 128.37  
 128.32  
 128.29  
 127.97  
 127.84  
 127.69  
 127.58  
 97.92  
 97.21  
 82.10  
 81.64  
 80.10  
 79.94  
 77.73  
 77.57  
 77.25  
 77.00  
 76.74  
 75.68  
 75.46  
 74.93  
 74.85  
 73.34  
 72.31  
 70.32  
 70.19  
 68.42  
 66.00  
 55.11

Current Data Parameters  
 NAME aa-Bgc-174a-13c  
 EXPNO 1  
 PROCNO 1  
 F2 - Acquisition Parameters  
 Date\_ 20221129  
 Time 15.16  
 INSTRUM spect  
 PROBHD 5 mm CFBP50-BB  
 PULPROG zgpg30zr.7sh  
 ID 32768  
 SOLVENT CDCl3  
 NS 128  
 DS 0  
 SWH 29761.904 Hz  
 FIDRES 0.908261 Hz  
 AQ 0.5505024 sec  
 RG 132.8  
 DW 16.800 usec  
 DE 19.03 usec  
 TE 298.0 K  
 D1 1.00000000 sec  
 D11 0.03000000 sec  
 D16 0.00020000 sec  
 D20 0.00010000 sec  
 ID0 1  
 CHANNEL f1  
 SFO1 125.7967335 MHz  
 NUC1 13C  
 P1 9.17 usec  
 P13 2000.00 usec  
 P26 500.00 usec  
 PLW0 0 W  
 PLW1 62.00000000 W  
 SFOAL5 Cfp60comp.4  
 SFOALS 0.500  
 SFOFFS 0 Hz  
 SPWS 7.96570015 W  
 SPNAM[8] Cfp60.0.5.20.1  
 SFOALS 0.500

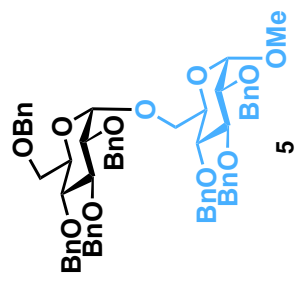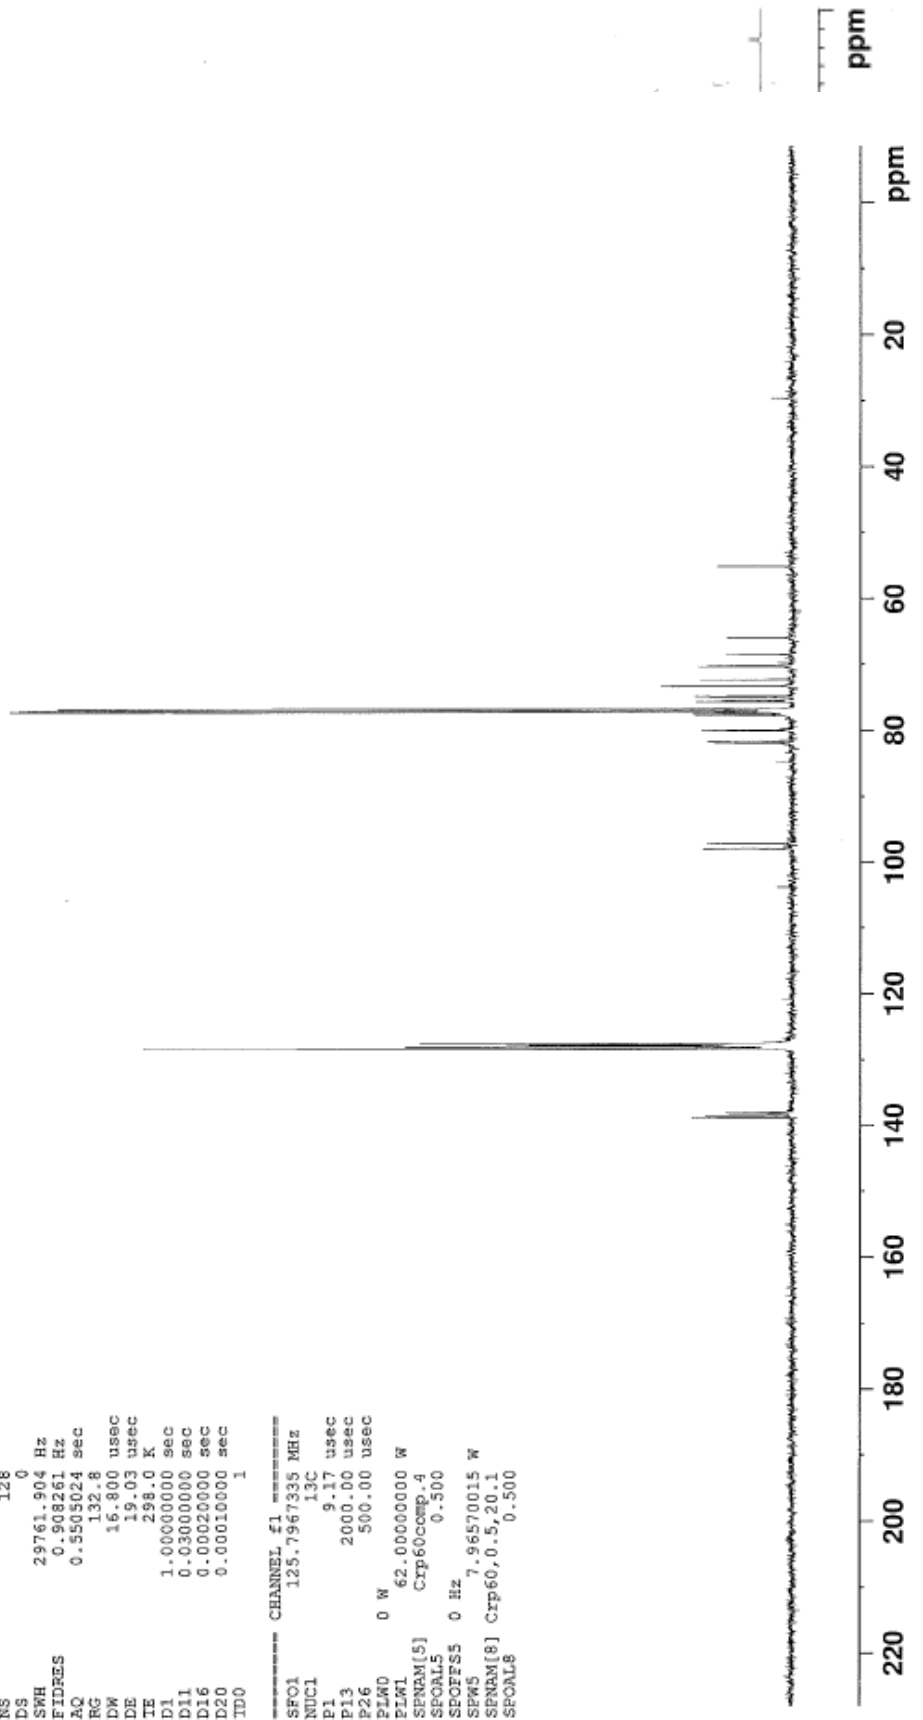

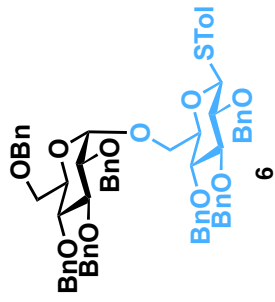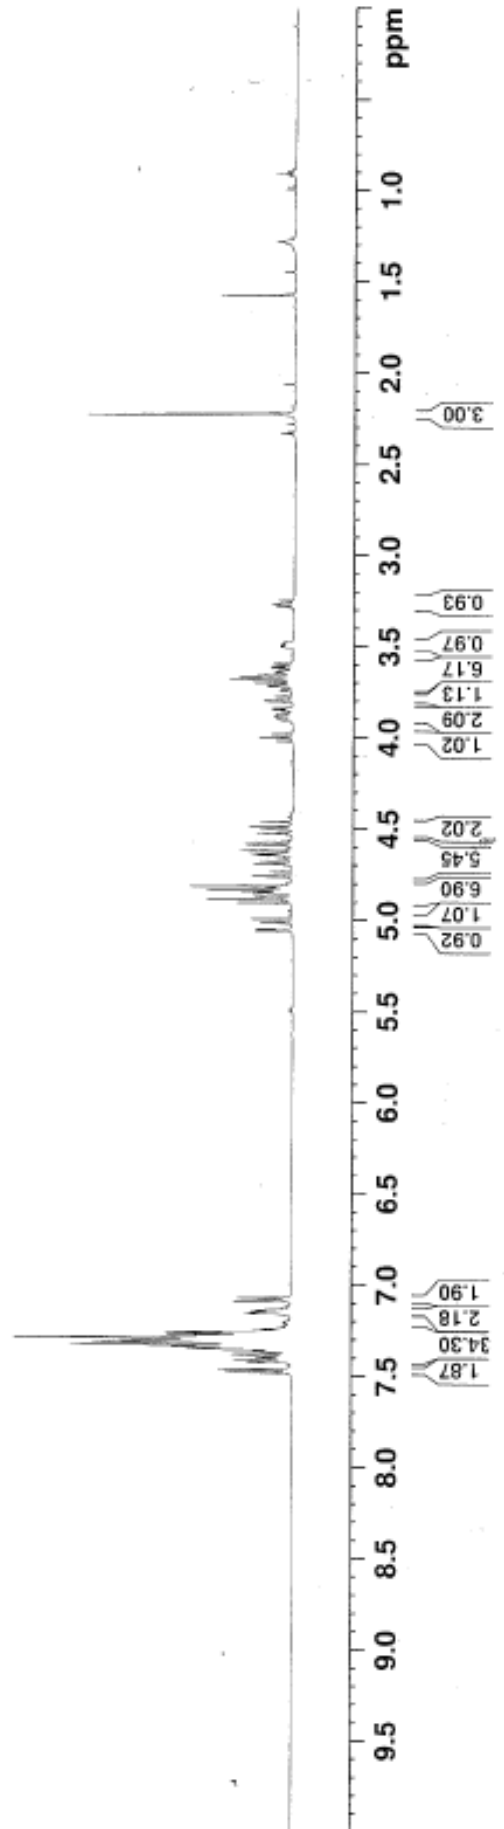

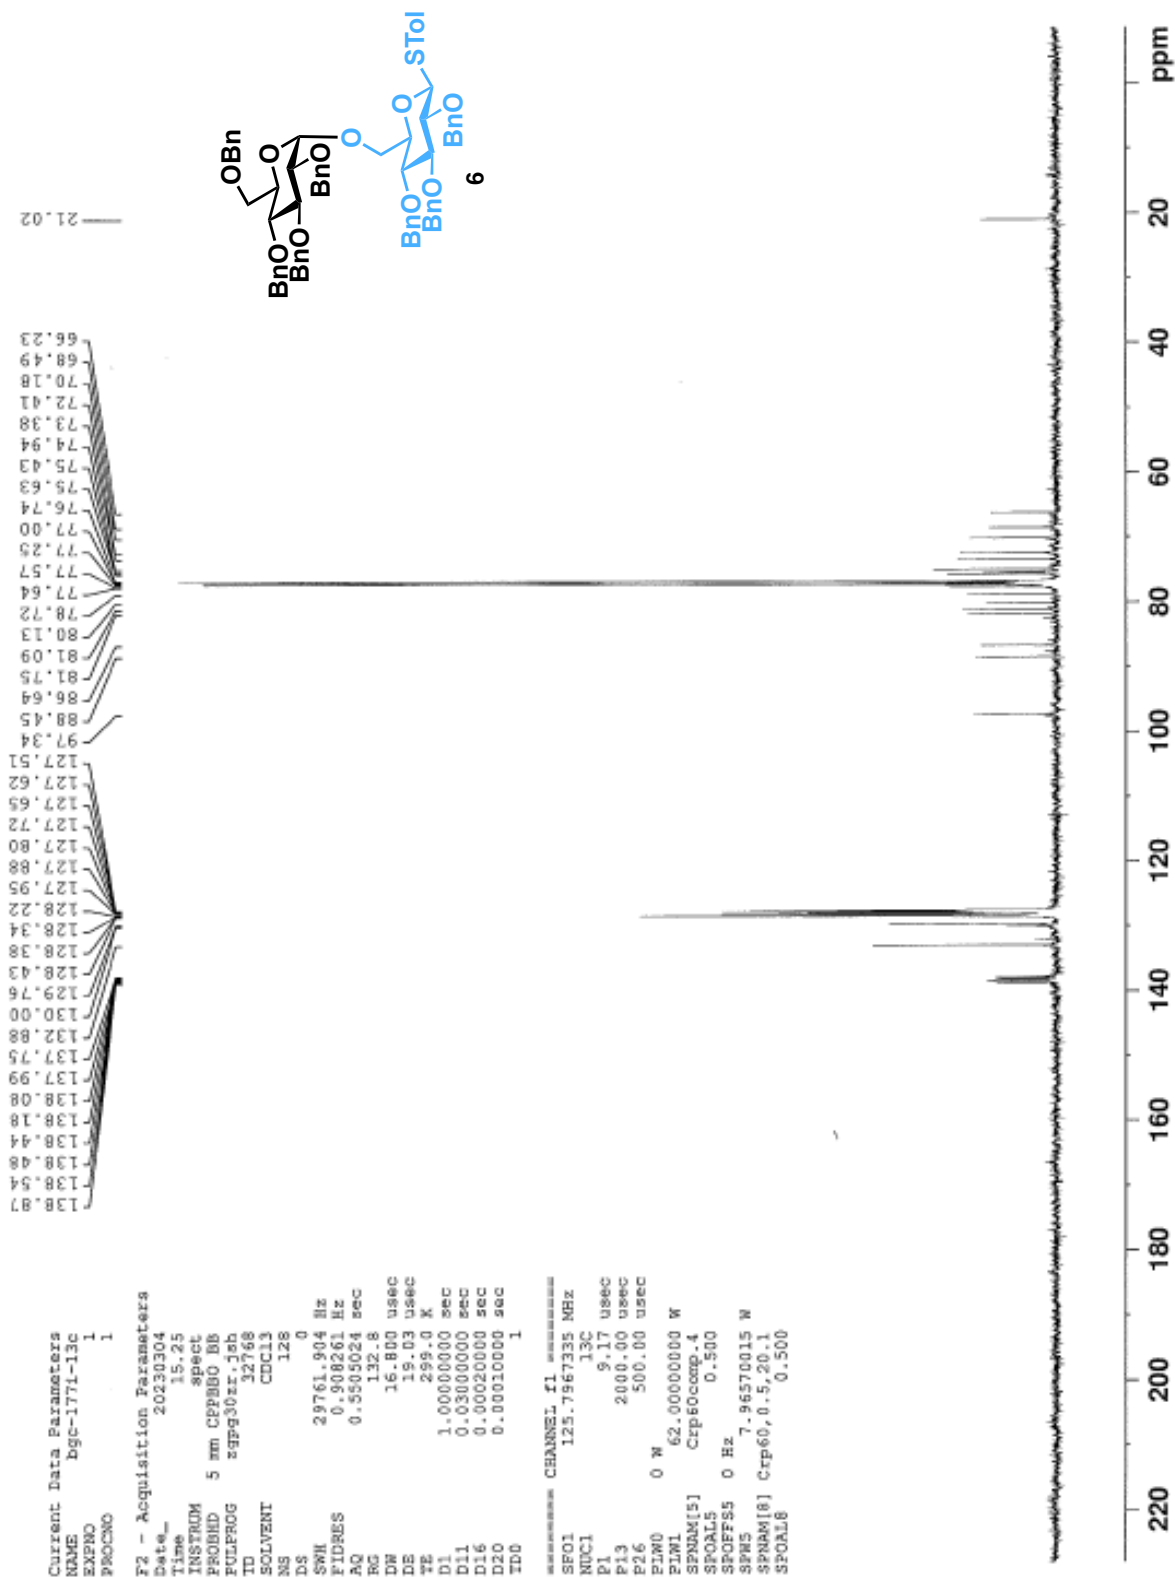



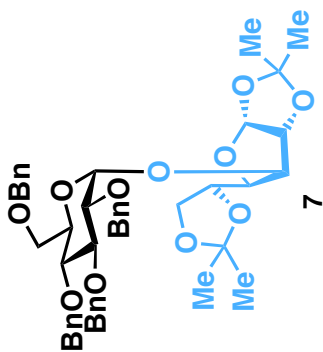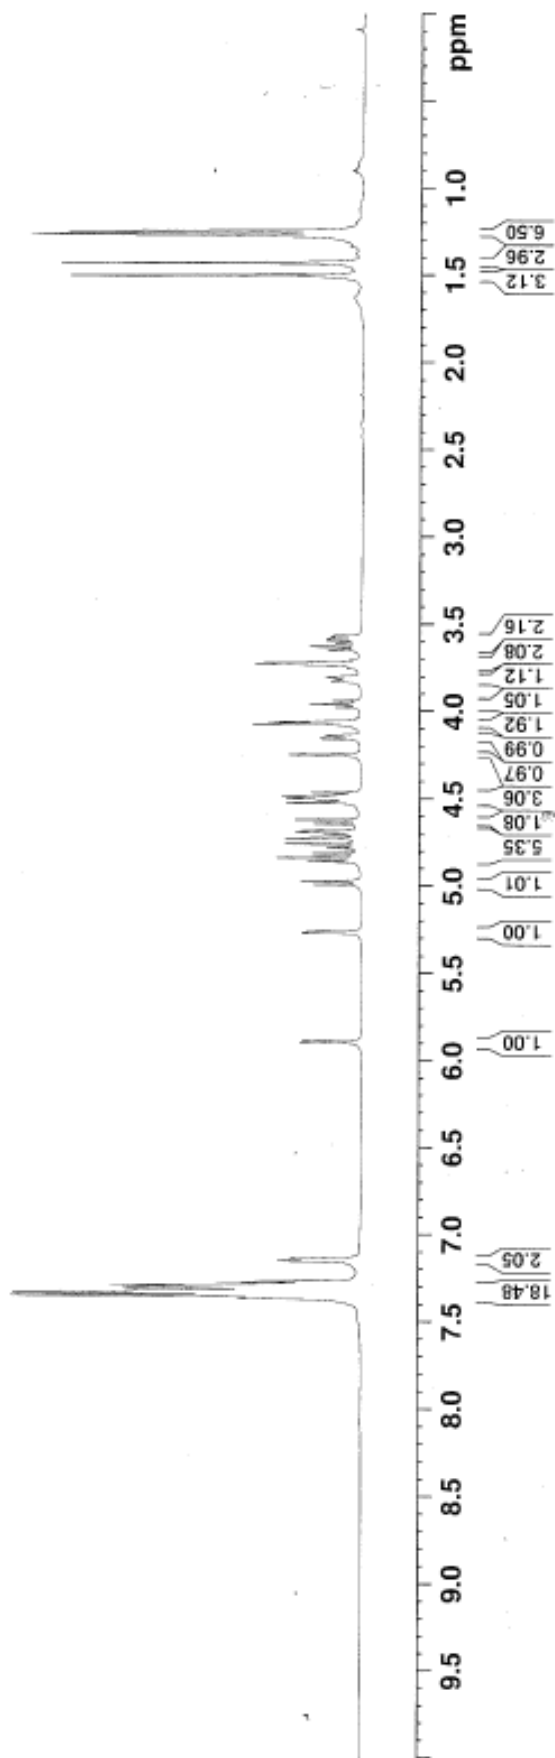

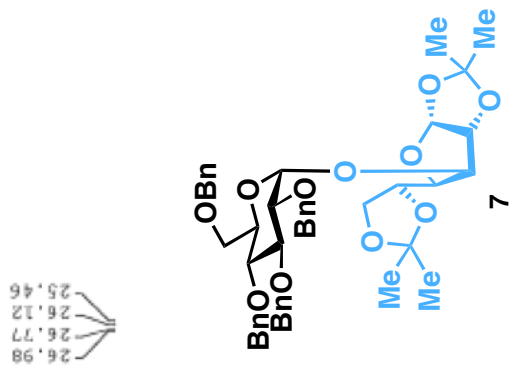

26.98  
26.77  
26.12  
25.46

138.63  
138.14  
137.92  
137.81  
128.43  
128.37  
128.04  
127.92  
127.86  
127.73  
127.68  
127.54  
111.76  
109.04  
109.17  
97.92  
83.68  
81.48  
81.17  
80.60  
79.94  
77.64  
77.25  
77.00  
76.75  
75.62  
75.29  
73.54  
73.03  
72.32  
71.17  
68.56  
67.03

Current Data Parameters  
 NAME aa-bgc-1718-13c  
 EXPNO 1  
 PROCNO 1

F2 - Acquisition Parameters  
 Date\_ 20221129  
 Time 17.05  
 INSTRUM spect  
 PROBD 5 mm CPBBBO BB  
 PULPROG zgpg30zr\_1sh  
 ID 32768  
 SOLVENT CDCl3  
 NS 101  
 DS 0  
 SWH 29761.904 Hz  
 FIDRES 0.908261 Hz  
 AQ 0.550524 sec  
 RG 132.8  
 DW 16.800 usec  
 DE 19.03 usec  
 TE 298.0 K  
 D1 1.00000000 sec  
 D11 0.03000000 sec  
 D16 0.00020000 sec  
 D20 0.00010000 sec  
 TD0 1

CHANNEL f1  
 SP01 125.7967335 MHz  
 NUC1 13C  
 P1 9.17 usec  
 PL1 2000.00 usec  
 P26 500.00 usec  
 PLW0 0 W  
 PLW1 62.00000000 W  
 SFOALS1 Ccp60comp.4  
 SFOALS 0.500  
 STOPTES 0 Hz  
 SPM5 7.96570015 M  
 SFOALS1 Ccp60,0.5,20.1  
 SFOALS 0.500

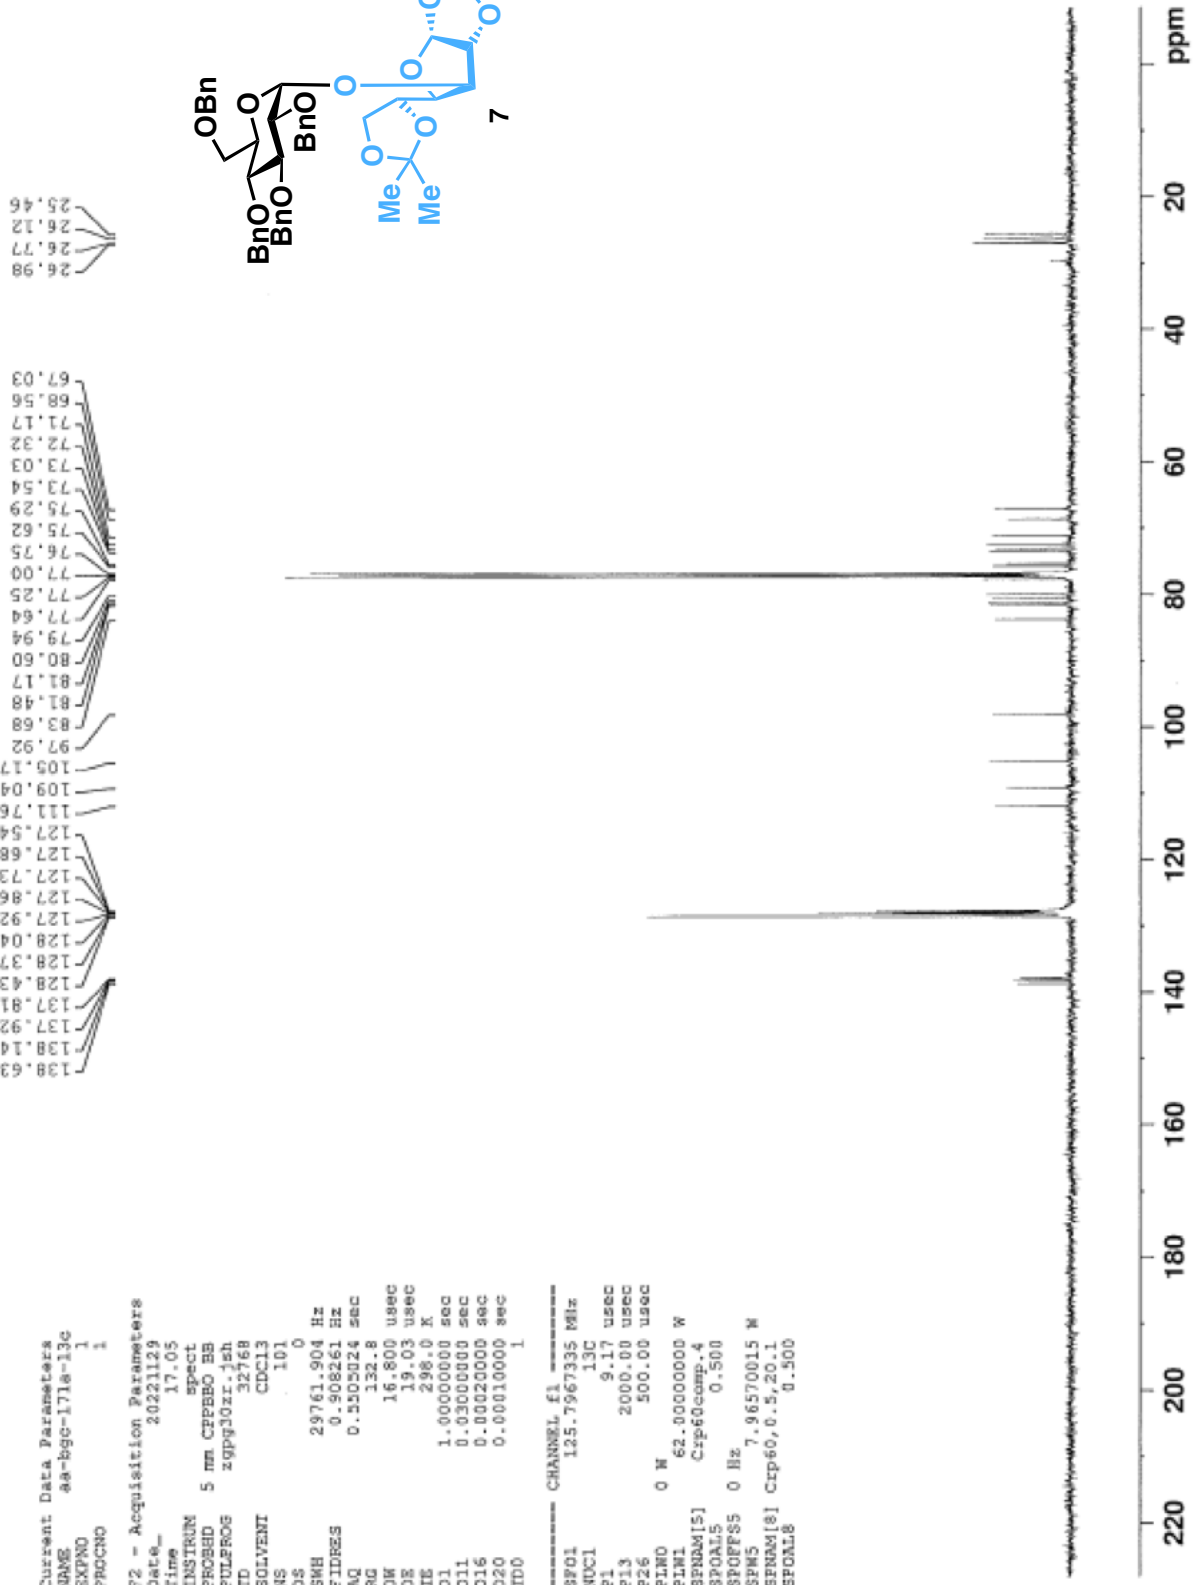

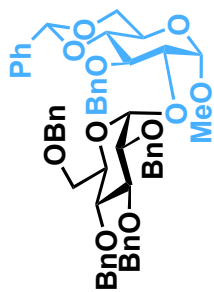

8

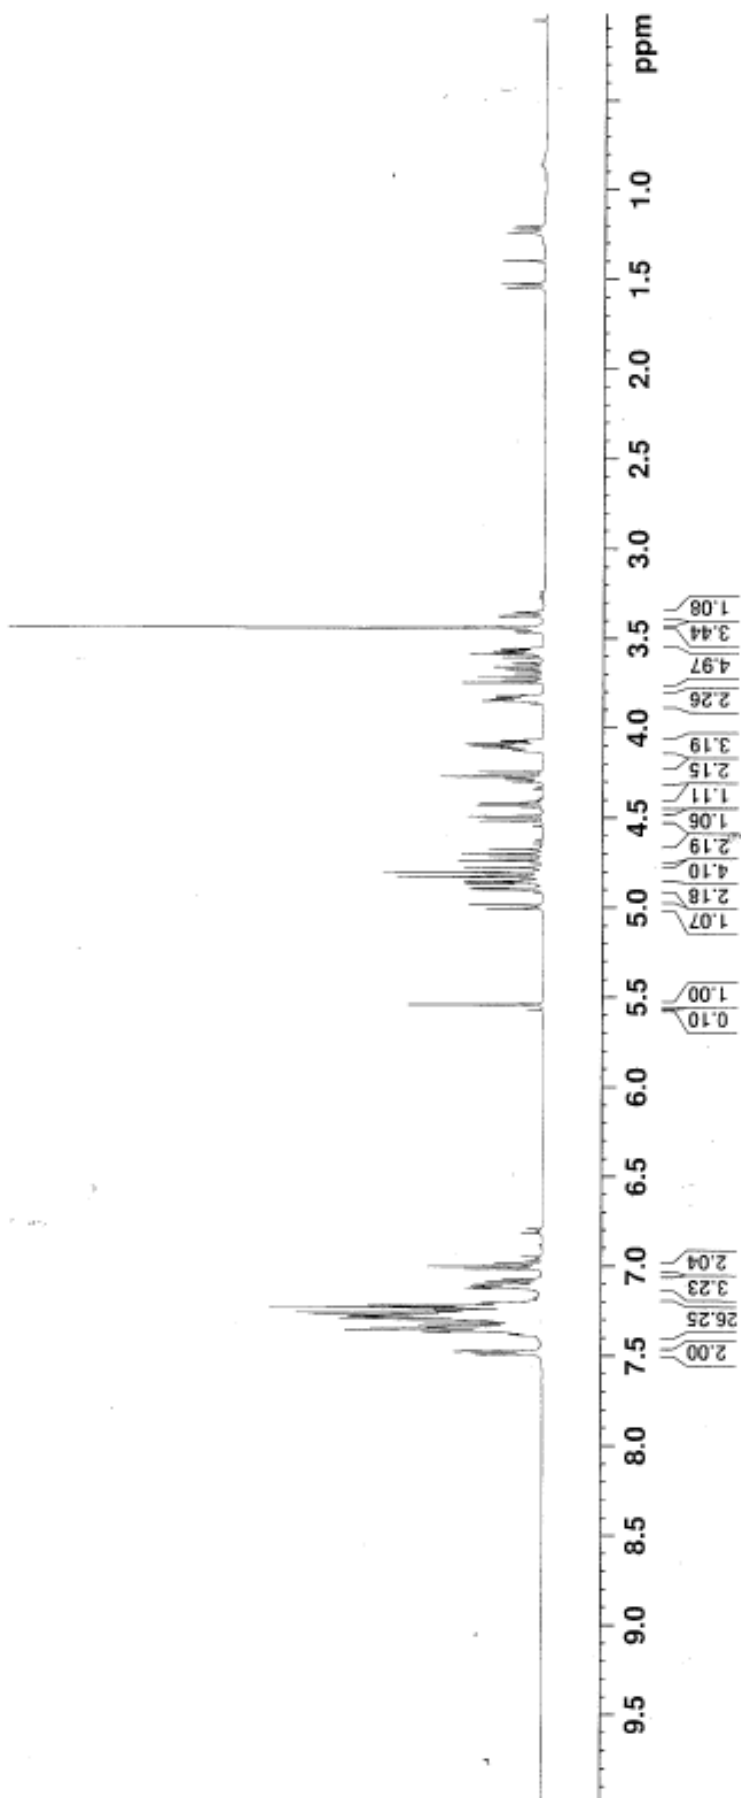

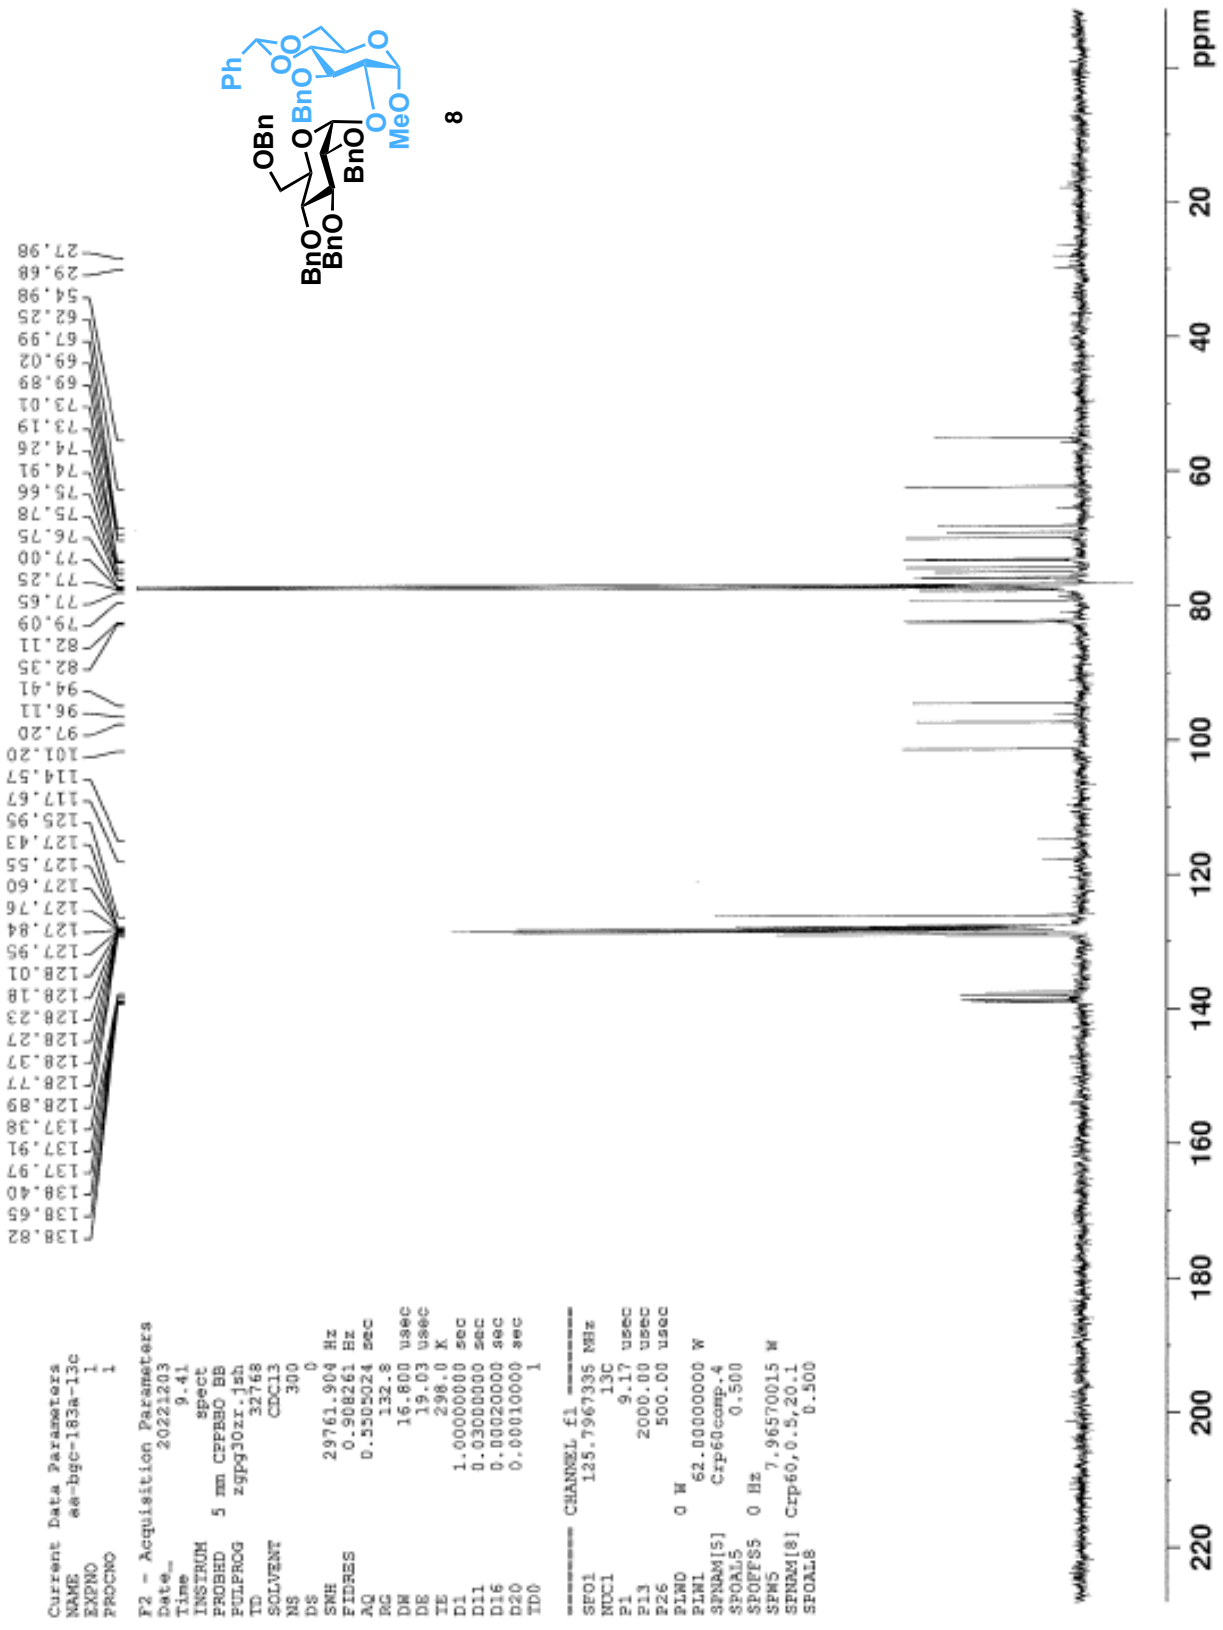

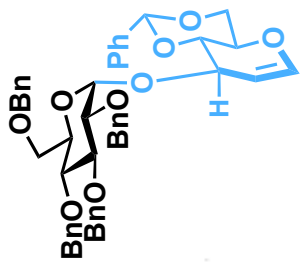

9

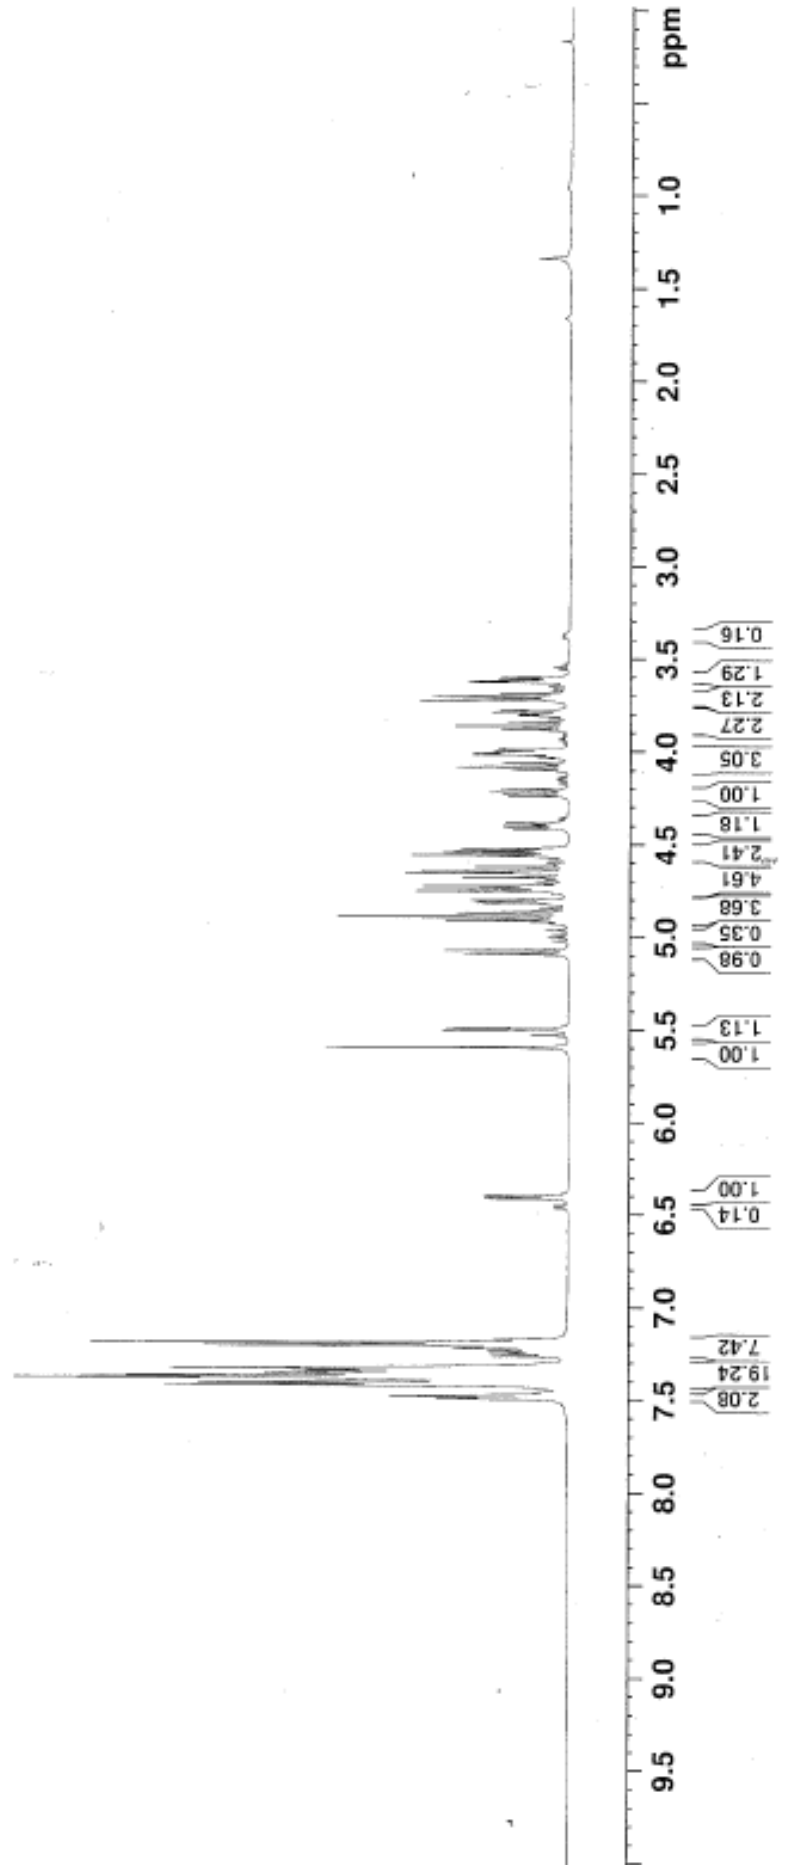

Current Data Parameters  
 NAME aa-bgc-180a-13c  
 EXPRNO 1  
 PROCNO 1

F2 - Acquisition Parameters  
 Date\_ 20221130  
 Time 9.23  
 INSTRUM spect  
 PROBHD 5 mm CFP300 BB  
 PULPROG zgpg30zz.jah  
 TD 32768  
 SOLVENT CDCl3  
 NS 128  
 DS 0  
 SWH 27761.904 Hz  
 FIDRES 0.908261 Hz  
 AQ 0.5505024 sec  
 RG 132.8  
 DN 16.800 usec  
 DE 19.03 usec  
 TE 298.0 K  
 D1 1.00000000 sec  
 D11 0.03000000 sec  
 D16 0.00020000 sec  
 D20 0.00010000 sec  
 TD0 1

===== CHANNEL f1 =====  
 SFO1 125.7967335 MHz  
 NUC1 13C  
 P1 9.17 usec  
 F13 2000.00 usec  
 P26 500.00 usec  
 PLW0 0 W  
 PLW1 62.00000000 W  
 SENAM[5] Crp60comp.4  
 SFOAL5 0.500  
 SPOFF55 0 Hz  
 SPW5 7.96570015 W  
 SPMAM[8] Crp60.0.5.20.1  
 SFOAL8 0.500

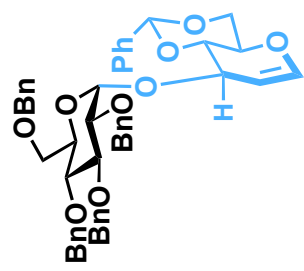

9

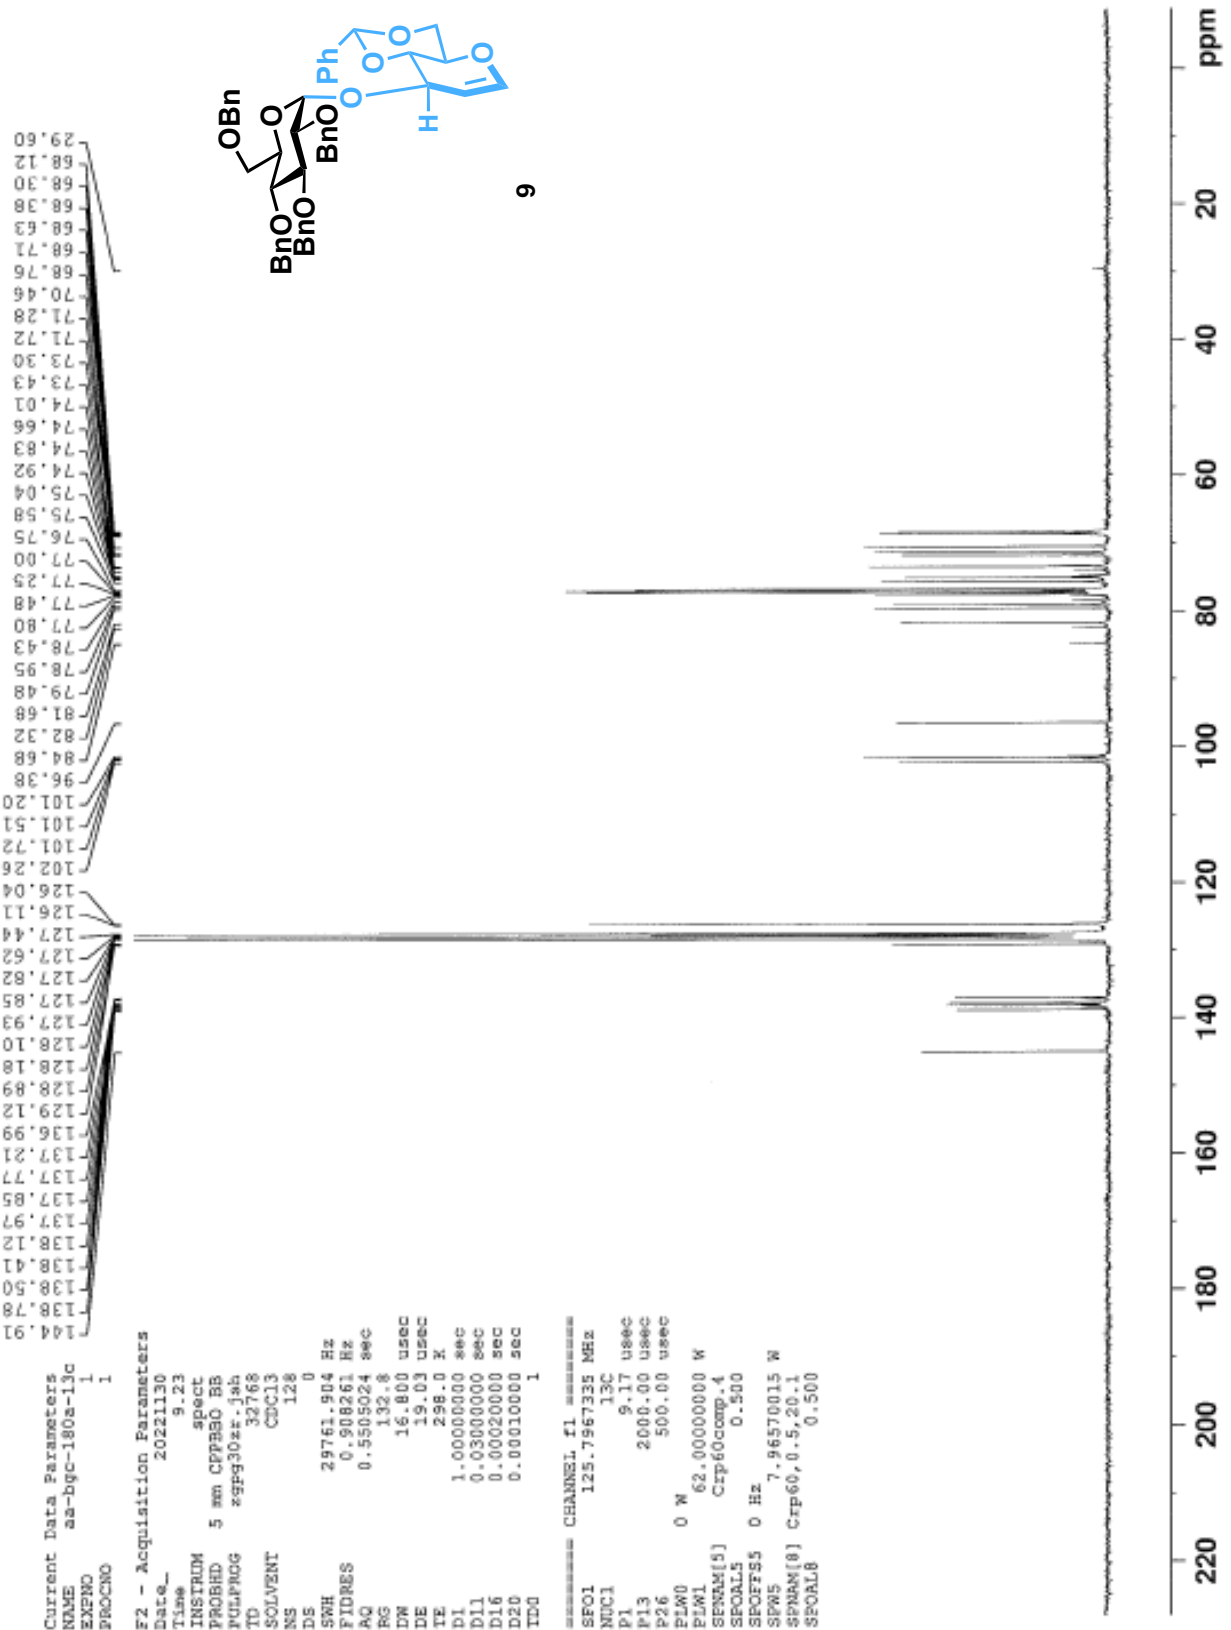

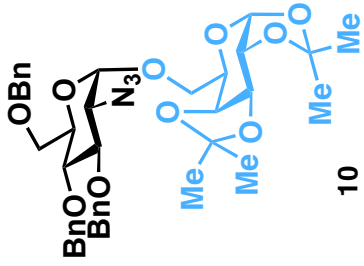

10

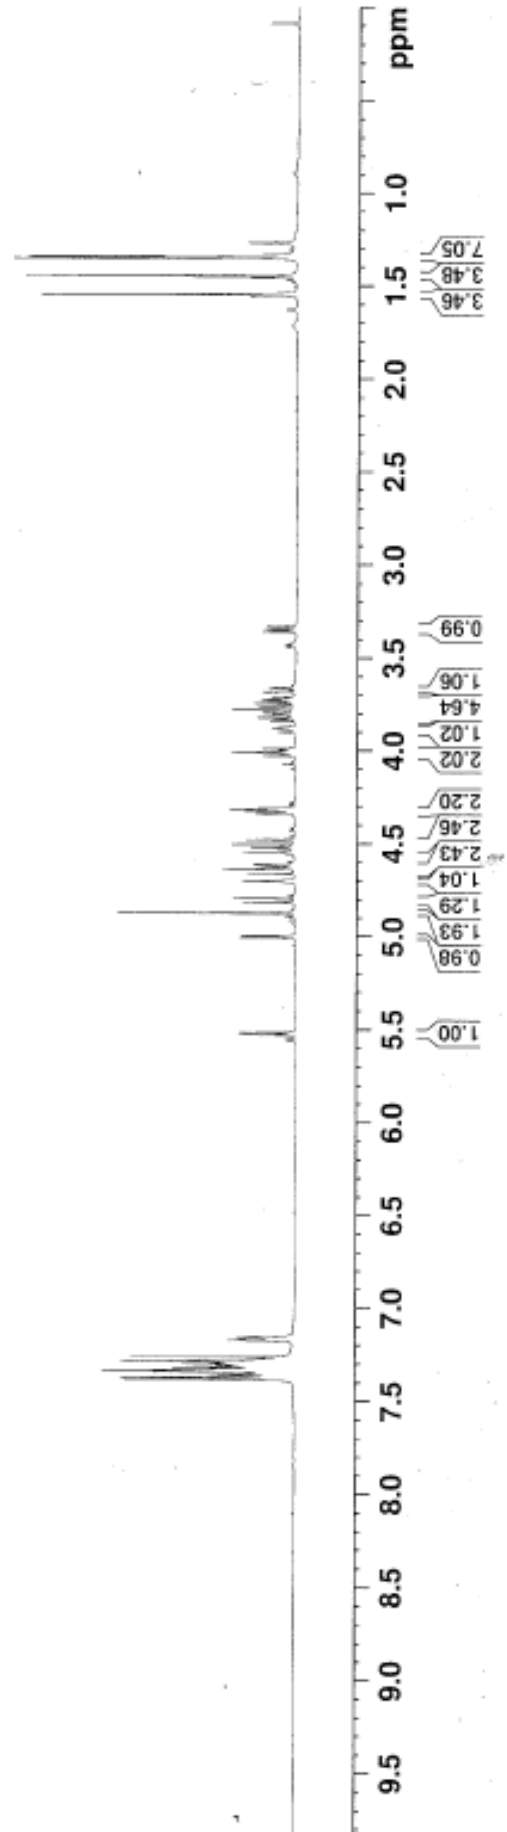

138.01  
137.81  
126.53  
128.41  
127.96  
127.90  
127.78  
127.72  
127.62  
126.94  
109.24  
108.57  
98.24  
96.21  
79.85  
78.19  
77.25  
77.00  
76.74  
75.24  
74.91  
73.47  
71.20  
70.79  
70.63  
70.53  
68.10  
67.56  
66.80  
66.39  
66.19  
65.34  
63.33  
29.67  
26.08  
25.93  
24.91  
24.35

Current Data Parameters  
 NAME aa-bgc-287-13c  
 EXPNO 1  
 PROCNO 1

F2 - Acquisition Parameters  
 Date\_ 20221118  
 Time 8.52  
 INSTRUM spect  
 PROBRD 5 mm CPBPR0 MB  
 PULPROG zgpg30zr.jeh  
 ID 32768  
 SOLVENT CDCl3  
 NS 116  
 DS 0  
 SWH 29761.904 Hz  
 FIDRES 0.808261 Hz  
 AQ 0.5505024 sec  
 RG 132.8  
 DM 16.800 usec  
 DE 19.03 usec  
 TE 298.0 K  
 D1 1.00000000 sec  
 D11 0.03000000 sec  
 D16 0.00020000 sec  
 D20 0.00010000 sec  
 TD0 1

CHANNEL f1  
 FOC1 125.7967335 MHz  
 NUC1 13C  
 P1 9.17 usec  
 F13 2000.00 usec  
 P26 500.00 usec  
 PLW0 0 W  
 PLW1 62.00000000 W  
 SFOALS C1P60C0M0\_4  
 SFOALS 0 Hz  
 SFOALS 0.500  
 SPOFFS 0 Hz  
 SPW5 7.96570015 W  
 SFOALS C1P60.0.5.20.1  
 SFOALS 0.500

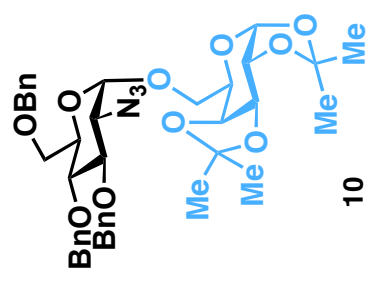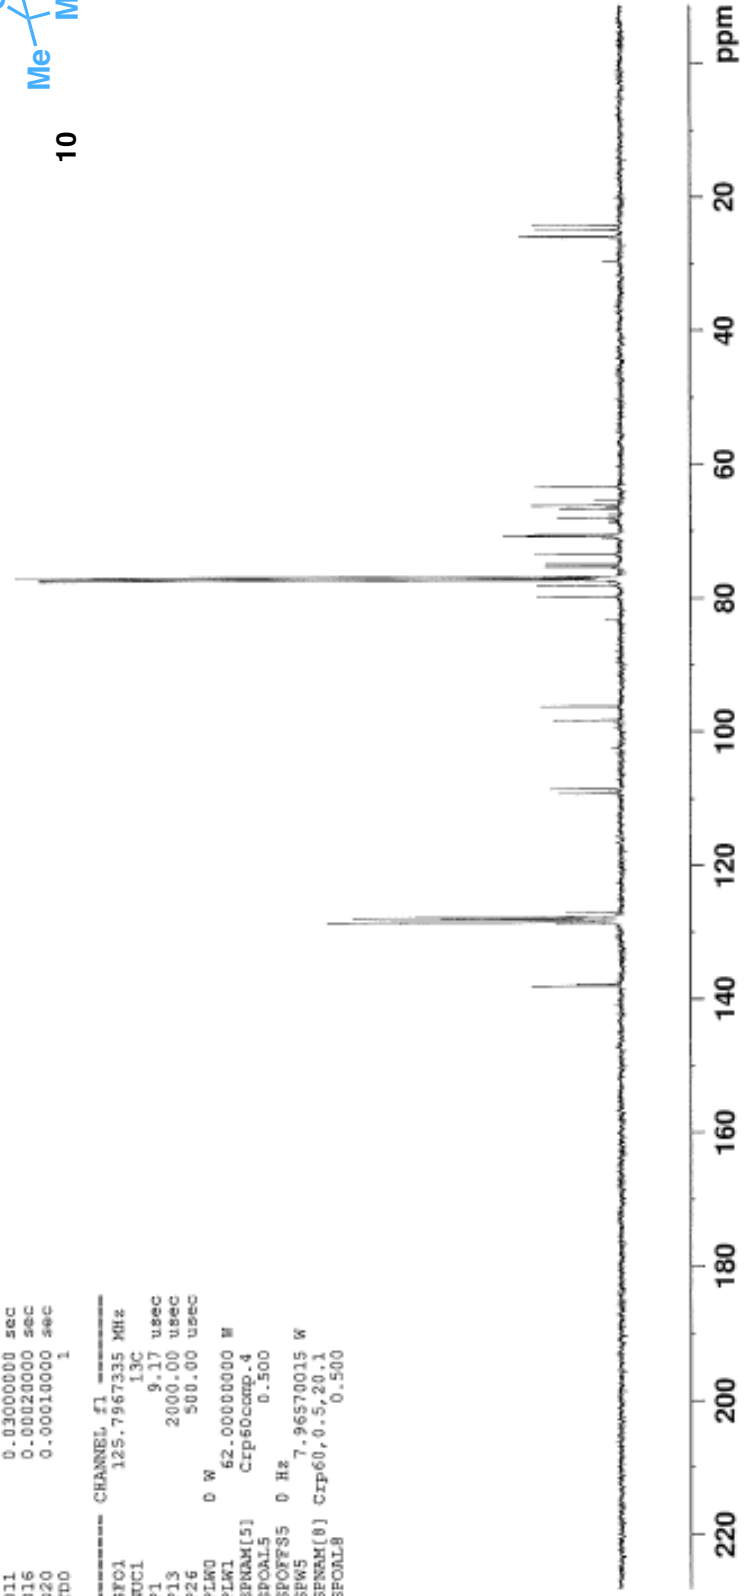



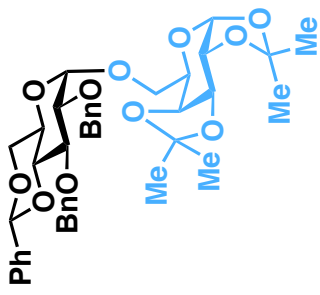

11

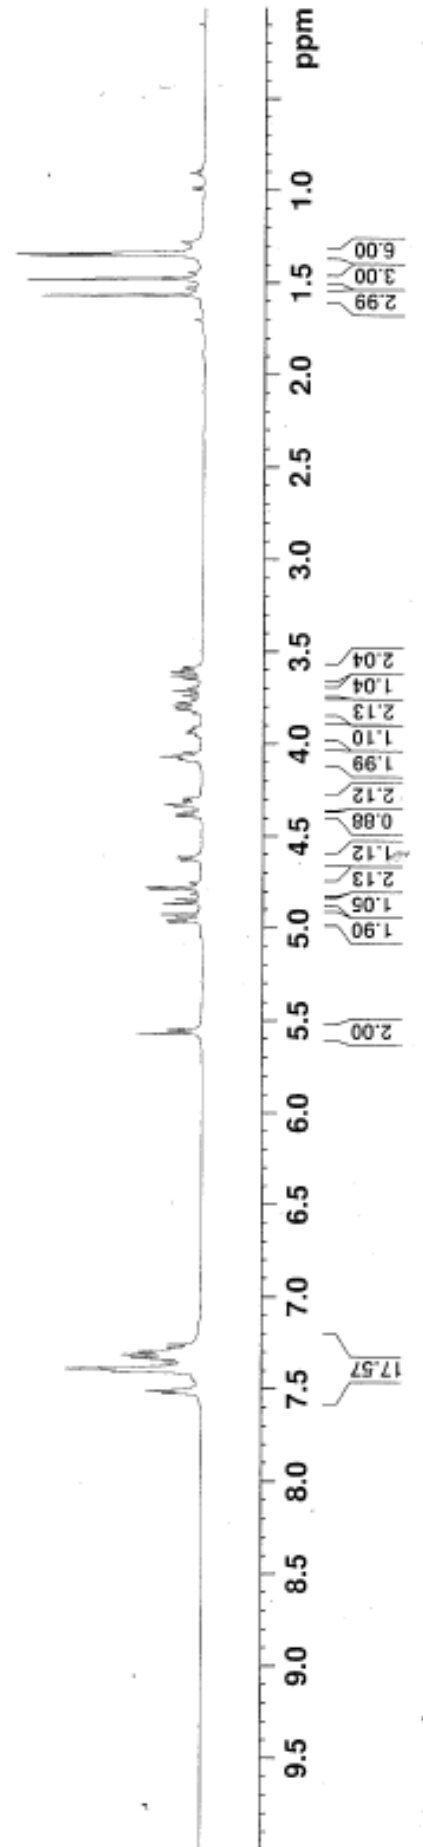

11

26.13  
26.02  
24.89  
24.57

138.82  
138.26  
137.46  
128.82  
128.48  
128.32  
128.22  
128.16  
127.99  
127.89  
127.73  
127.69  
127.47  
126.00  
109.17  
108.61  
101.14  
98.31  
96.28  
82.06  
79.21  
78.51  
77.26  
77.00  
76.75  
75.21  
72.84  
70.77  
70.61  
68.98  
66.84  
65.86  
62.41

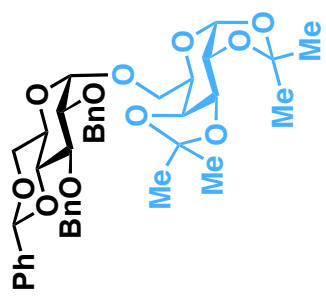

11

Current Data Parameters  
NAME sa-bgc-266b-13c  
EXPNO 1  
PROCNO 1

F2 - Acquisition Parameters  
Date\_ 20221118  
Time 9.09  
INSTRUM spect  
PROBHD 5 mm CFPBBO BB  
PULPROG zgpg30xt.jah  
TD 32768  
SOLVENT CDCl3  
NS 183  
DS 0  
SWH 29761.904 Hz  
FIDRES 0.908261 Hz  
AQ 0.555024 sec  
RG 132.8  
DM 16.800 usec  
DE 19.03 usec  
TE 298.0 K  
D1 1.00000000 sec  
D11 0.03000000 sec  
D16 0.00020000 sec  
D20 0.00010000 sec  
TD0 1

CHANNEL f1  
SFO1 125.7967335 MHz  
NUC1 13C  
P1 9.17 usec  
P2 2000.00 usec  
P26 500.00 usec  
PLW0 0 W  
PLW1 62.00000000 W  
SPNAM[5] Crp60comp.4  
SFOALS 0.500  
SFOFFS 0 Hz  
SEW5 7.96570015 W  
SPNAM[8] Crp60.0.5.20.1  
SFOALS 0.500

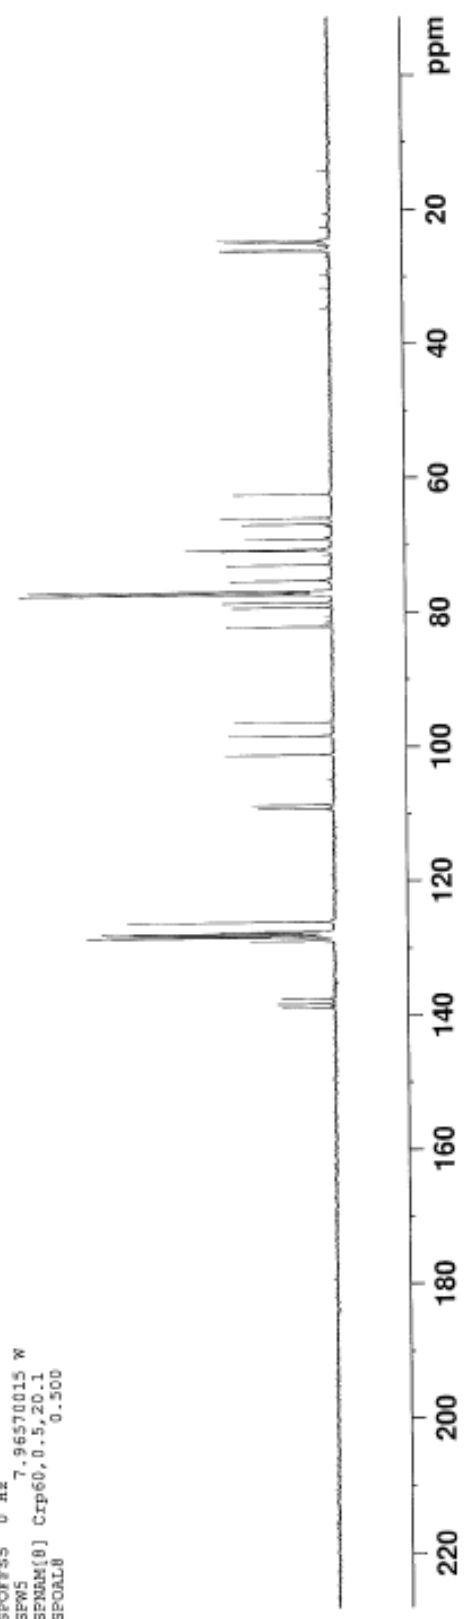

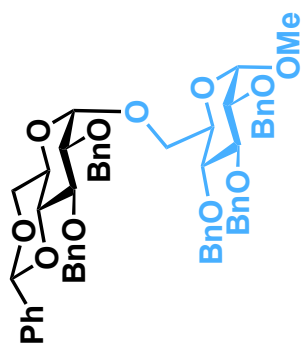

12

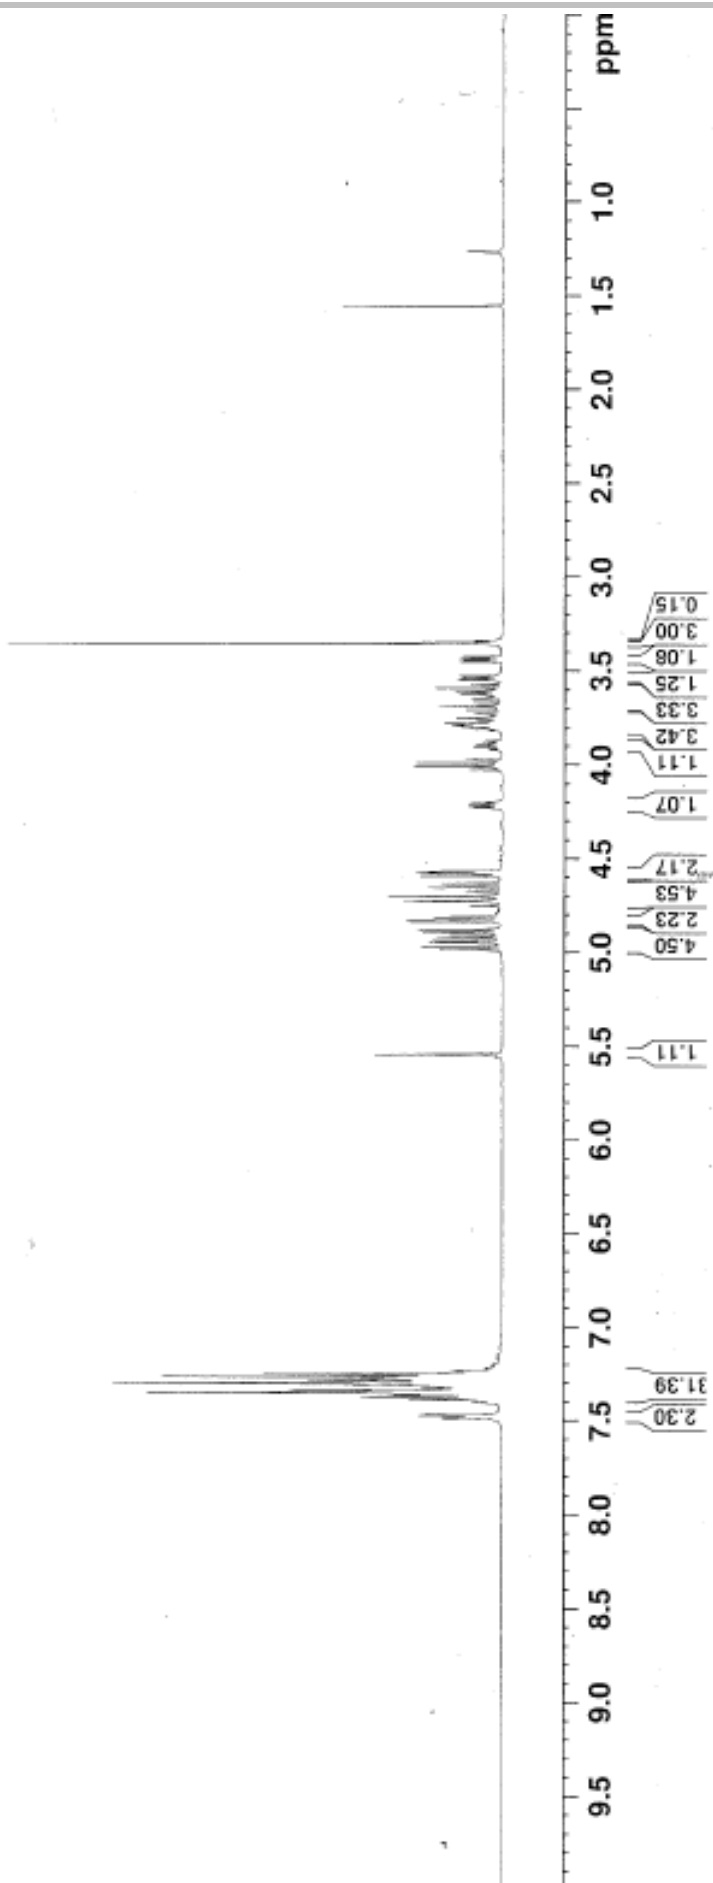

138.61  
 138.36  
 138.14  
 137.49  
 128.86  
 128.41  
 128.36  
 128.20  
 128.01  
 127.97  
 127.88  
 127.73  
 127.61  
 127.50  
 126.05  
 101.29  
 98.20  
 97.97  
 82.17  
 82.09  
 80.06  
 79.31  
 77.91  
 77.72  
 77.25  
 77.00  
 76.74  
 75.70  
 75.03  
 73.35  
 72.84  
 70.34  
 69.08  
 66.34  
 62.52  
 55.19

Current Data Parameters  
 NAME aa-bgc-242a-13c  
 EXFNO 1  
 PROCNO 1

F2 - Acquisition Parameters  
 Date\_ 20221130  
 Time 8.58

INSTRUM spect  
 PROBHD 5 mm CFPBBO BB  
 PULPROG zgpg30zr.jza  
 ID 32768

SOLVENT CDCl3  
 NS 1074  
 DS 0

SMH 29761.904 Hz  
 FIDRES 0.908261 Hz  
 AQ 0.5505024 sec  
 RG 132.8

DM 16.800 usec  
 DE 19.03 usec  
 TE 298.0 K

D1 1.00000000 sec  
 D11 0.03000000 sec  
 D16 0.00020000 sec  
 D20 0.00010000 sec  
 TD0 1

CHANNEL f1  
 SFO1 125.7967335 MHz  
 NUC1 13C

P1 9.17 usec  
 P13 2000.00 usec  
 P26 500.00 usec  
 FIM0 0 W  
 FILM1 62.00000000 W  
 SENAM[5] Cfp60comp.4  
 SFOCAL5 0.500  
 SFOFFS5 0 Hz  
 SPW5 7.96570015 W  
 SPNAM[8] Cfp60.0.5.20.1  
 SFOCAL8 0.500

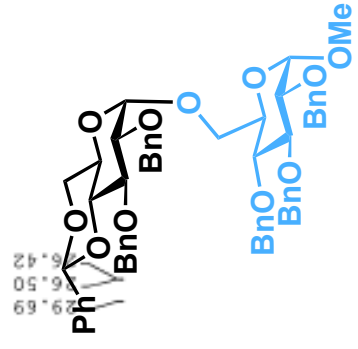

9.5

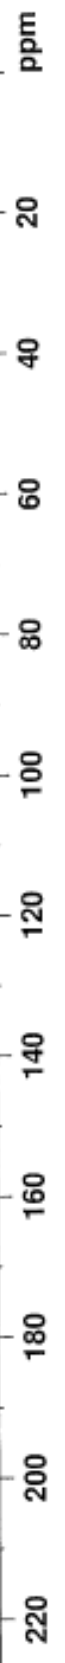

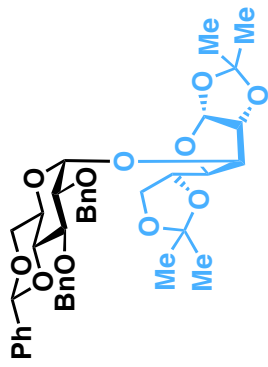

13

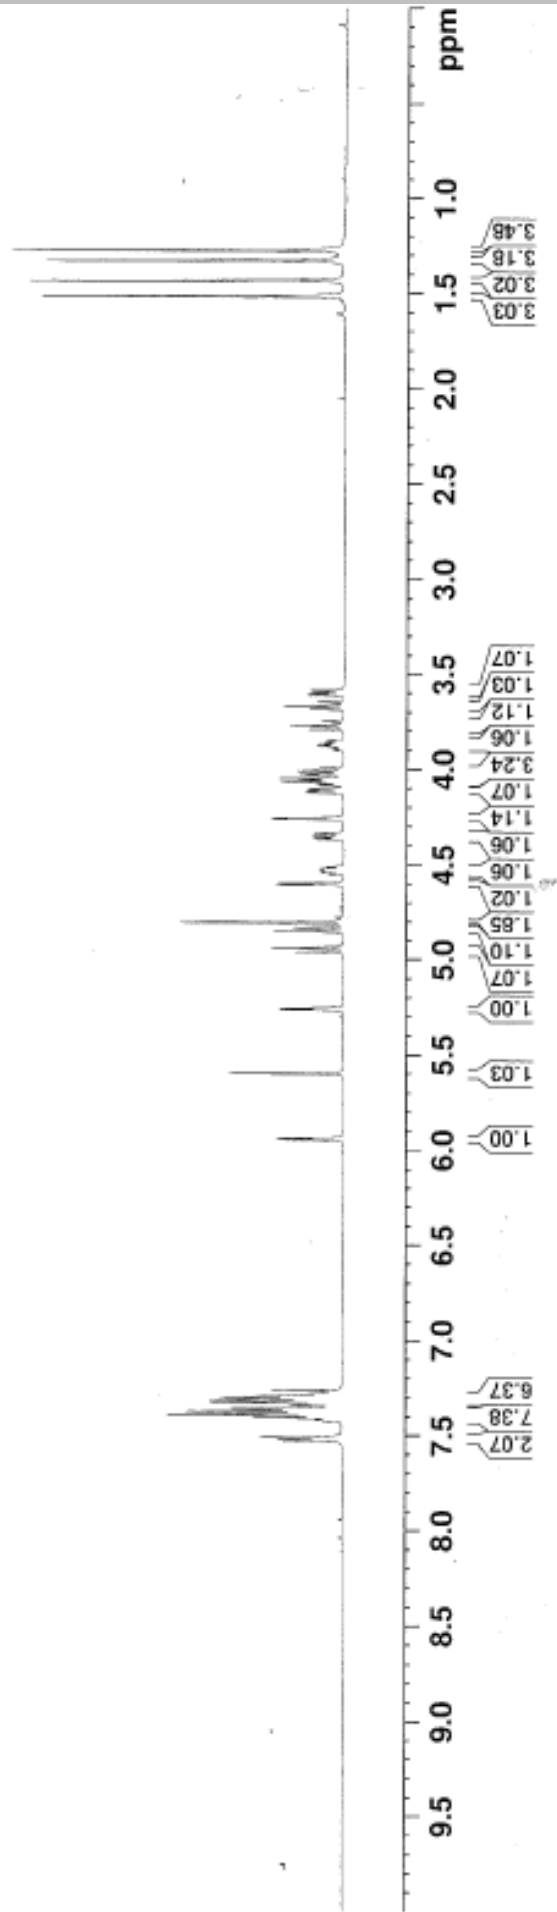

27.08  
26.81  
26.31  
25.46

63.34  
67.12  
68.94  
72.07  
73.68  
75.22  
76.74  
77.00  
77.25  
78.11  
79.20  
80.29  
81.17  
82.20  
84.05  
98.78  
101.12  
105.16  
109.13  
111.93  
125.86  
127.60  
127.71  
127.92  
128.29  
128.34  
128.95  
137.16  
138.05  
138.56

Current Data Parameters  
NAME aa-Bgc-267-13c  
EXPNO 1  
PROCNO 1

F2 - Acquisition Parameters  
Date\_ 20221114  
Time 16.13  
INSTRUM spect  
PROBHD 5 mm CPBBO BB  
PULPROG #pg30rr.ish  
TD 32768  
SOLVENT CDCl3  
NS 57  
DS 0  
SWH 29761.904 Hz  
FIDRES 0.508261 Hz  
AQ 0.5505024 sec  
RG 132.8  
DM 16.800 usec  
DE 19.03 usec  
TE 298.0 K  
D1 1.00000000 sec  
D11 0.03000000 sec  
D16 0.00020000 sec  
D20 0.00010000 sec  
TD0 1

CHANNEL f1  
SF01 125.7967335 MHz  
NUC1 13C  
P1 9.17 usec  
F13 2000.00 usec  
F26 500.00 usec  
PLW0 0 W  
PLW1 62.00000000 W  
SFOAM[5] Cfp60comp.4  
SFOALS 0.500  
SFOFFS5 0 Hz  
SFOVS 7.96570015 W  
SFOVM[8] Cfp60,0.5,20.1  
SFOALS8 0.500

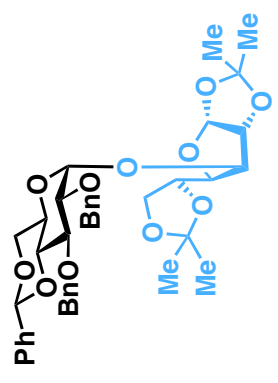

13

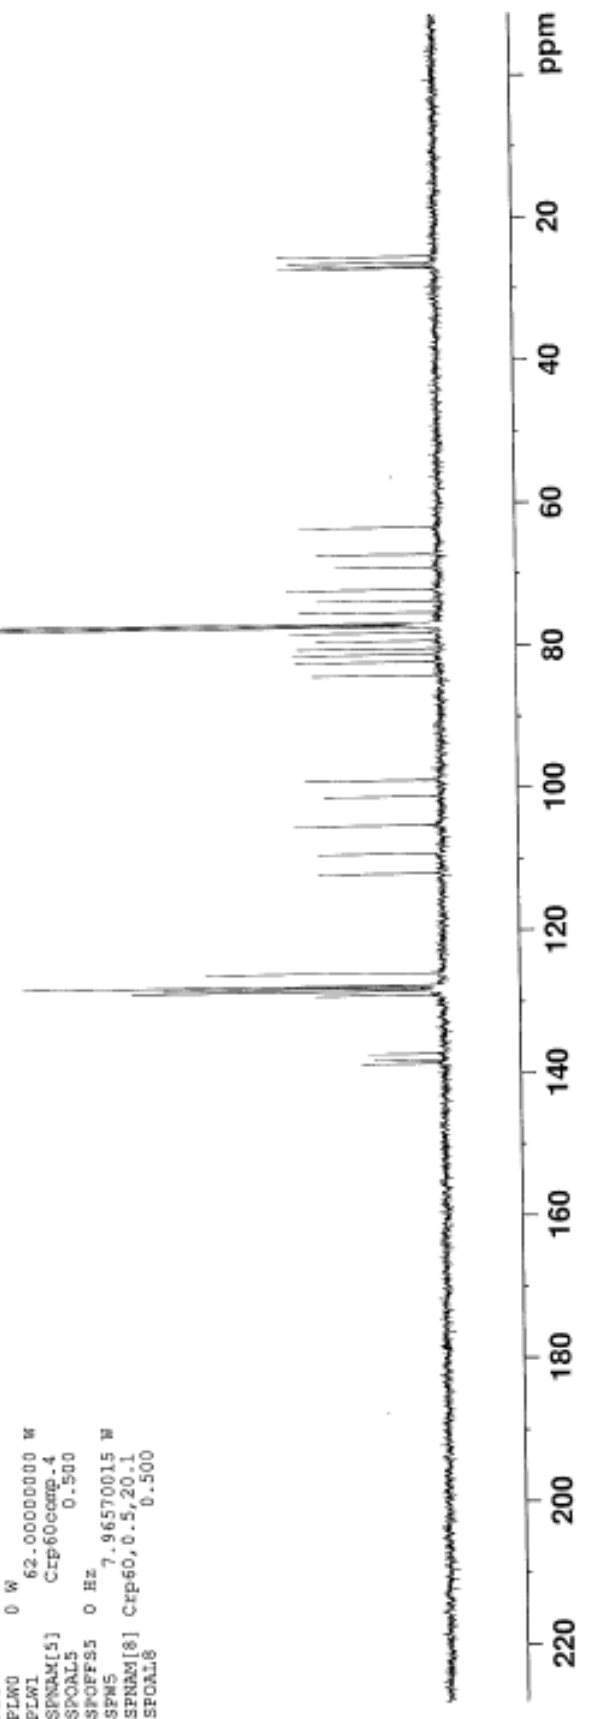

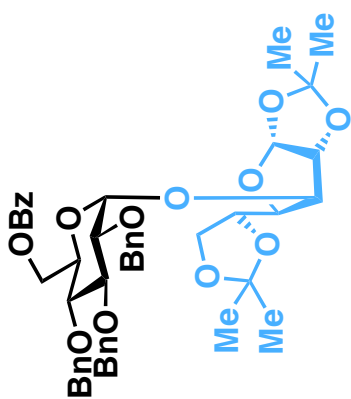

14

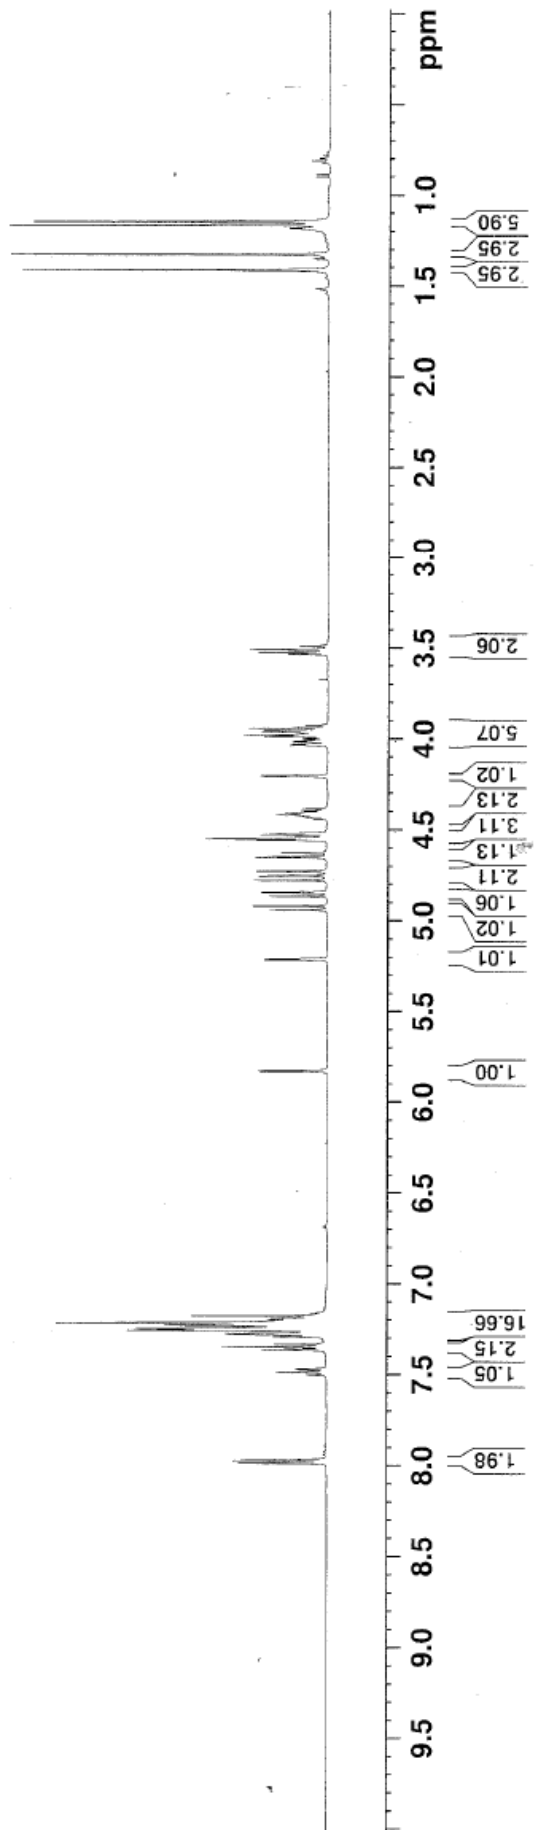

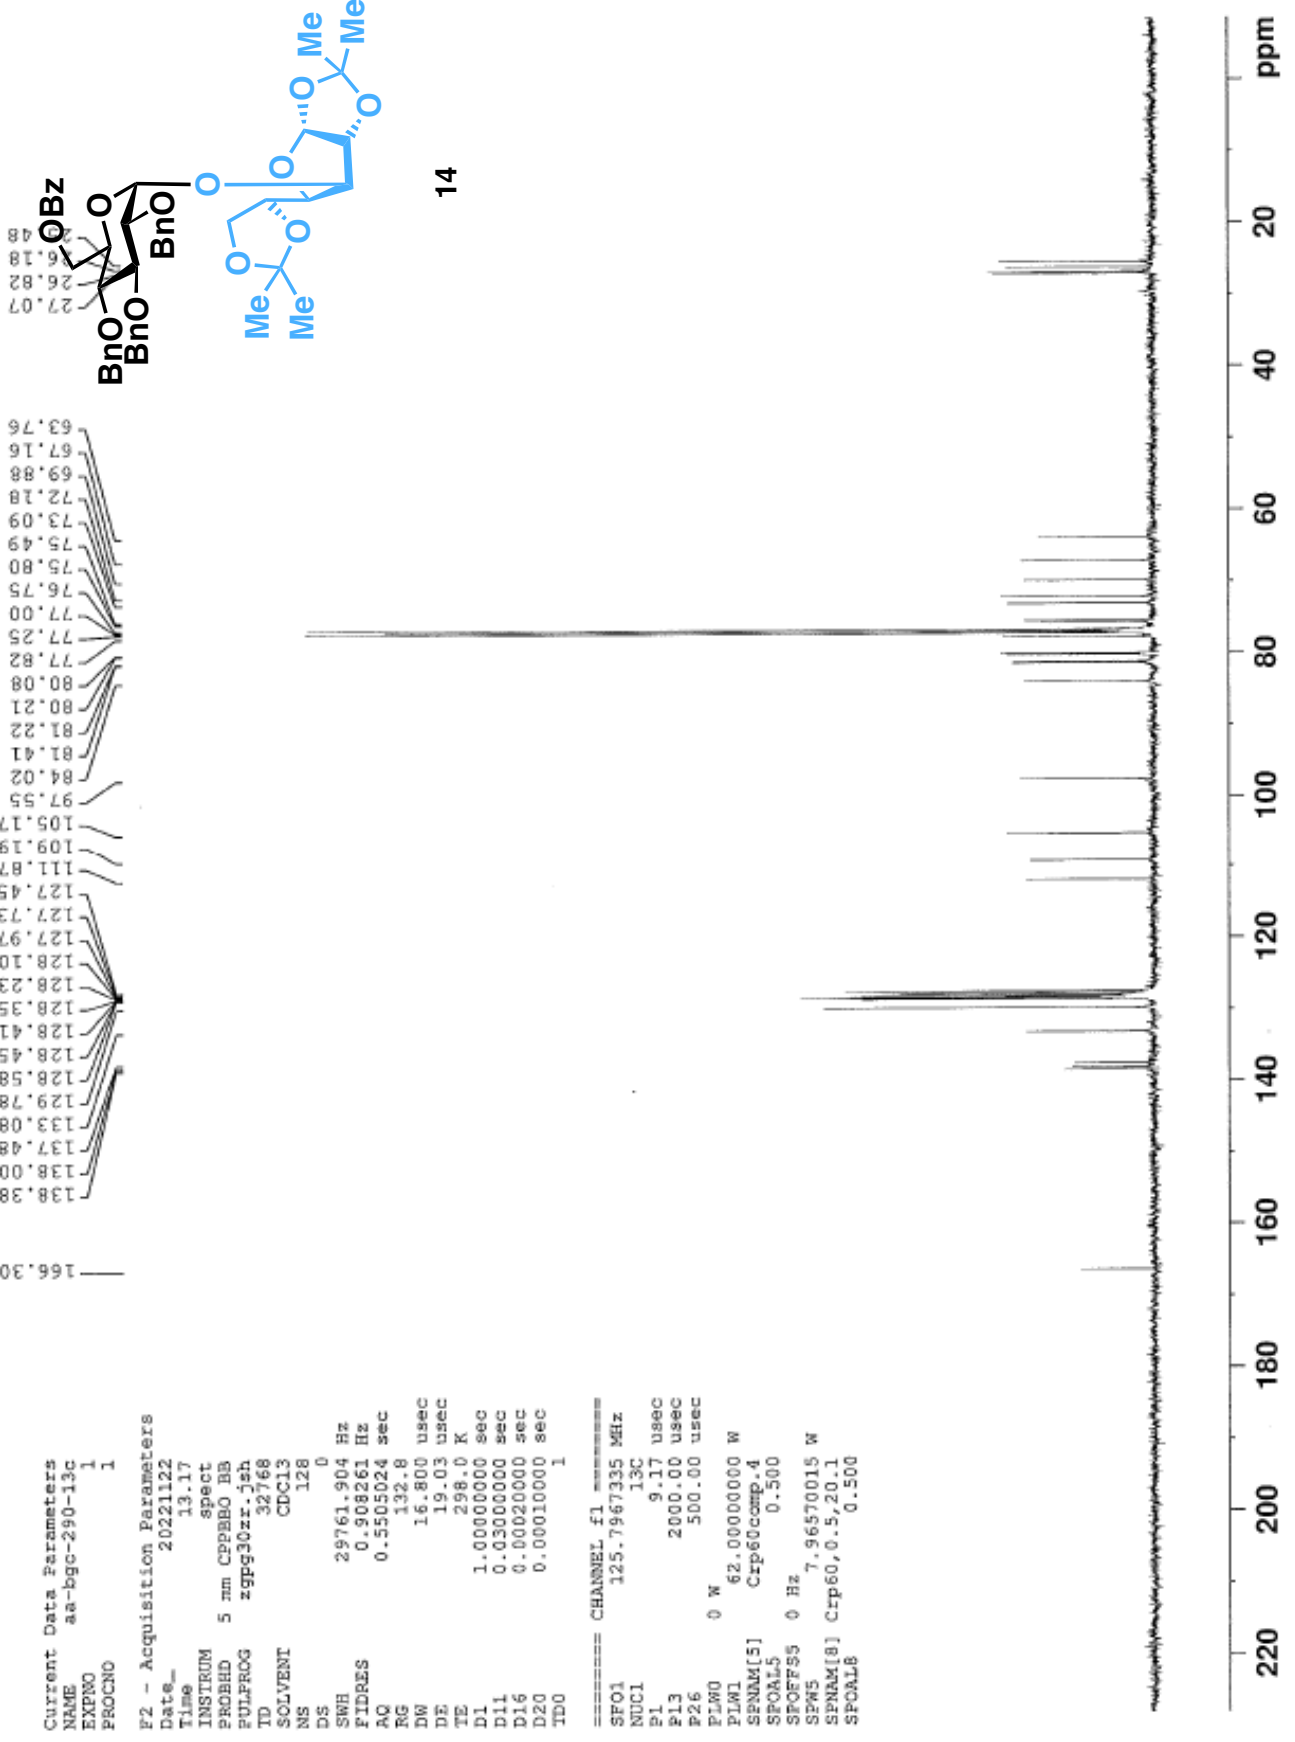

```

Current Data Parameters
NAME aa-bgc-290-13c
EXPNO 1
PROCNO 1

F2 - Acquisition Parameters
Date_ 20221122
Time 13.17
INSTRUM spect
PROBHD 5 mm CFPBBO B3
PULPROG zgpg30zr-jzb
TD 32768
SOLVENT CDC13
NS 128
DS 0
SWH 29761.904 Hz
FIDRES 0.308261 Hz
AQ 0.5505024 sec
RG 132.8
DW 16.800 usec
DE 19.03 usec
TE 298.0 K
D1 1.00000000 sec
D11 0.03000000 sec
D16 0.00020000 sec
D20 0.00010000 sec
TD0 1

===== CHANNEL f1 =====
SFO1 125.7967335 MHz
NUC1 13C
P1 9.17 usec
PL1 2000.00 usec
P26 500.00 usec
PLW0 0 W
PLW1 62.00000000 W
SPNAM[S] Crp60comp.4
SFOALS 0.500
SFOFFS 0 Hz
SPW5 7.96570015 W
SPNAM[8] Crp60,0.5,20.1
SFOALS 0.500

```

14



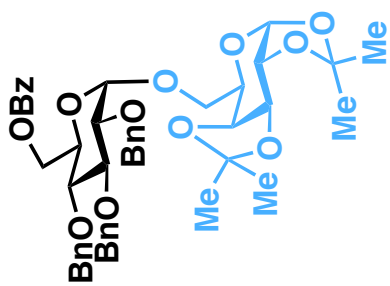

15

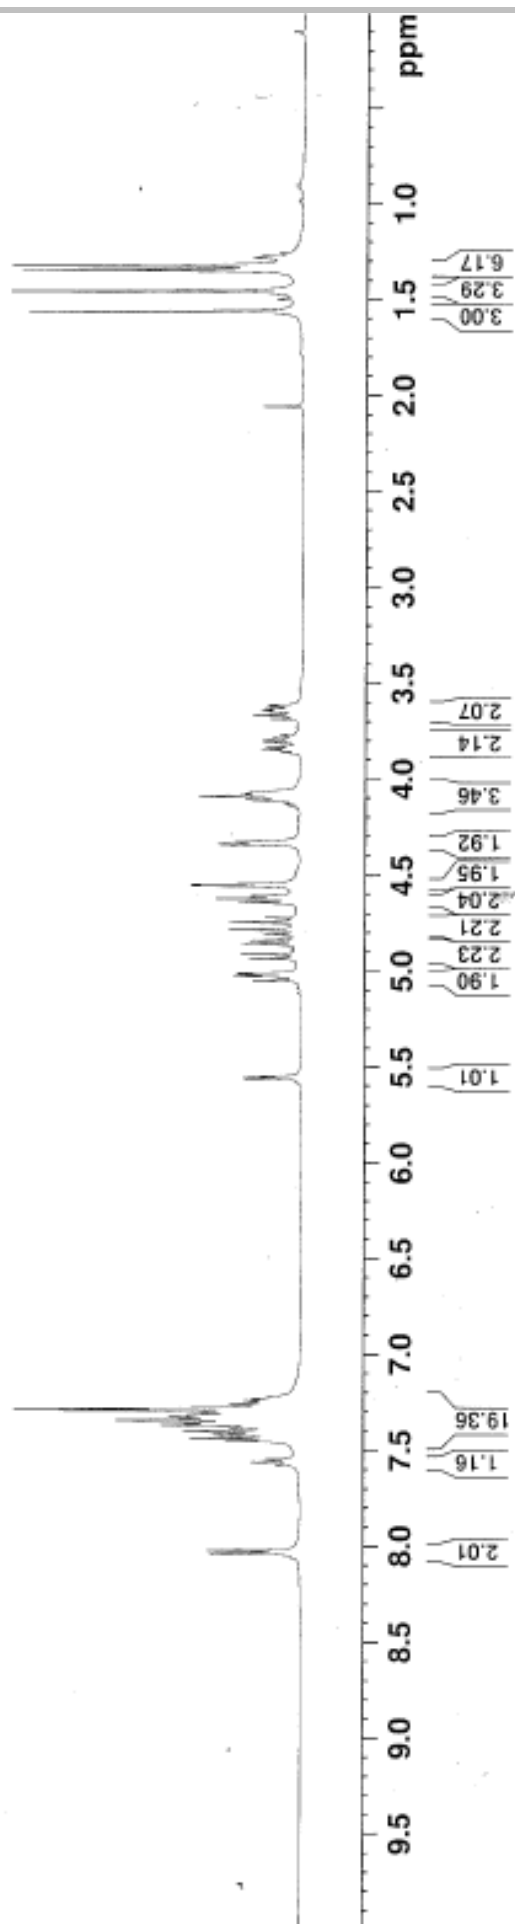

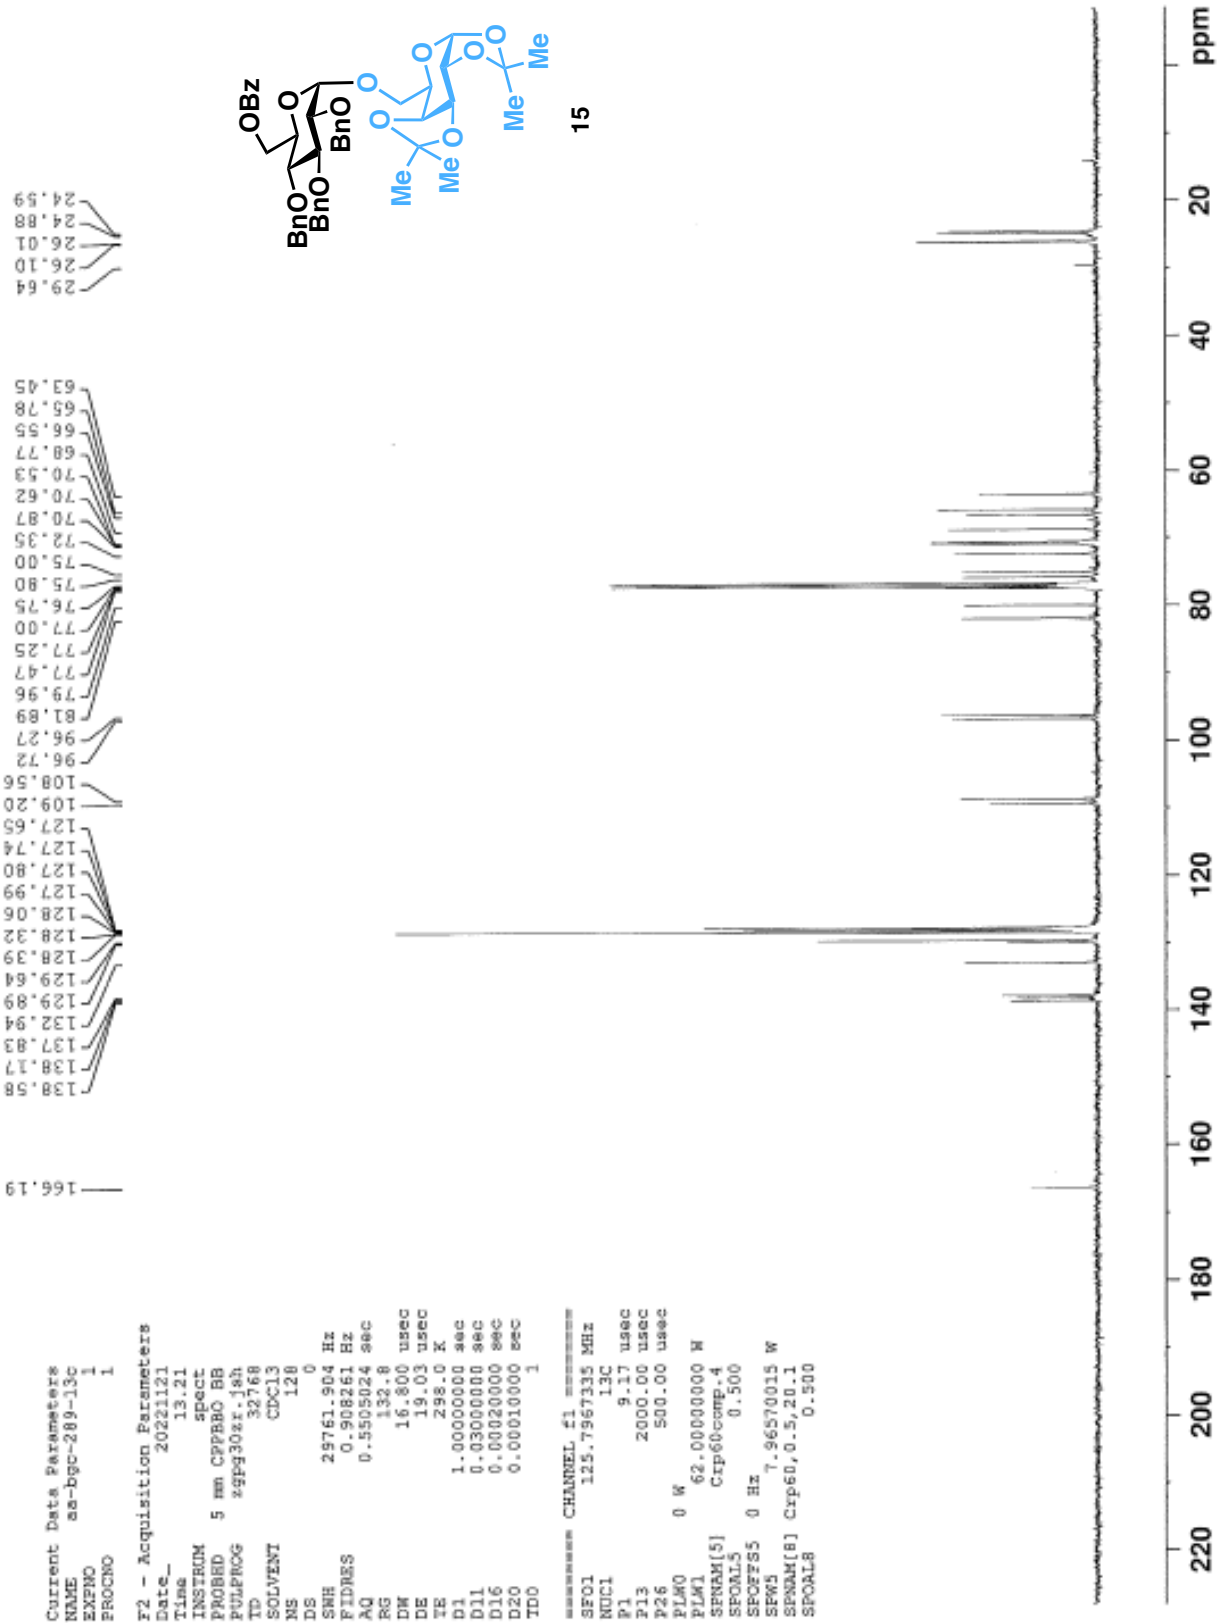

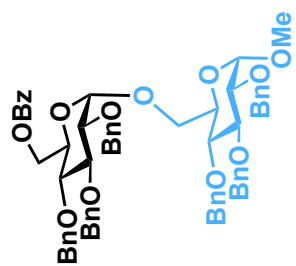

16

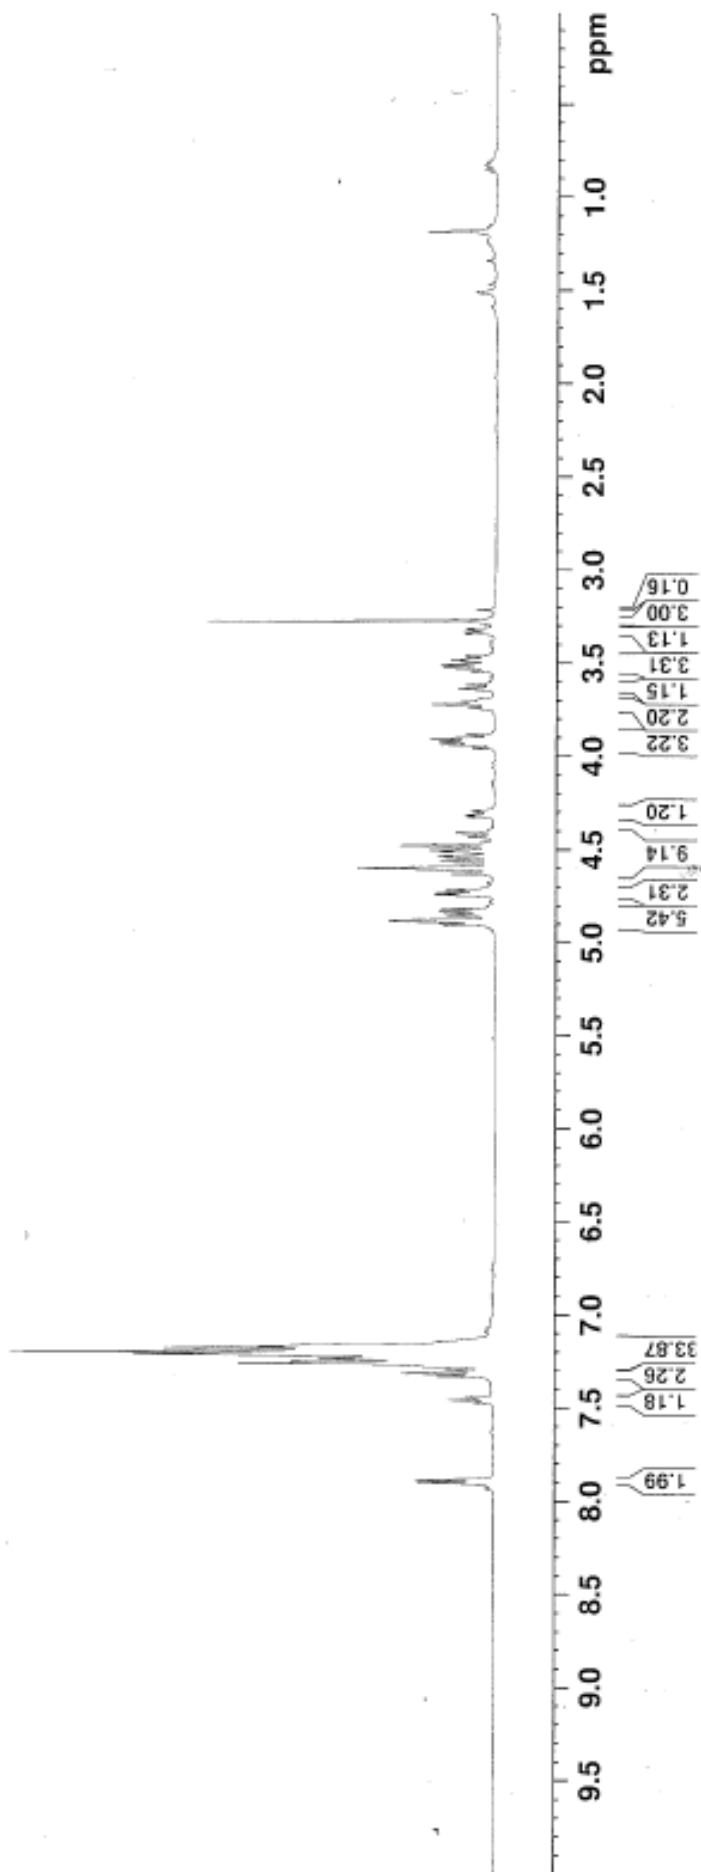

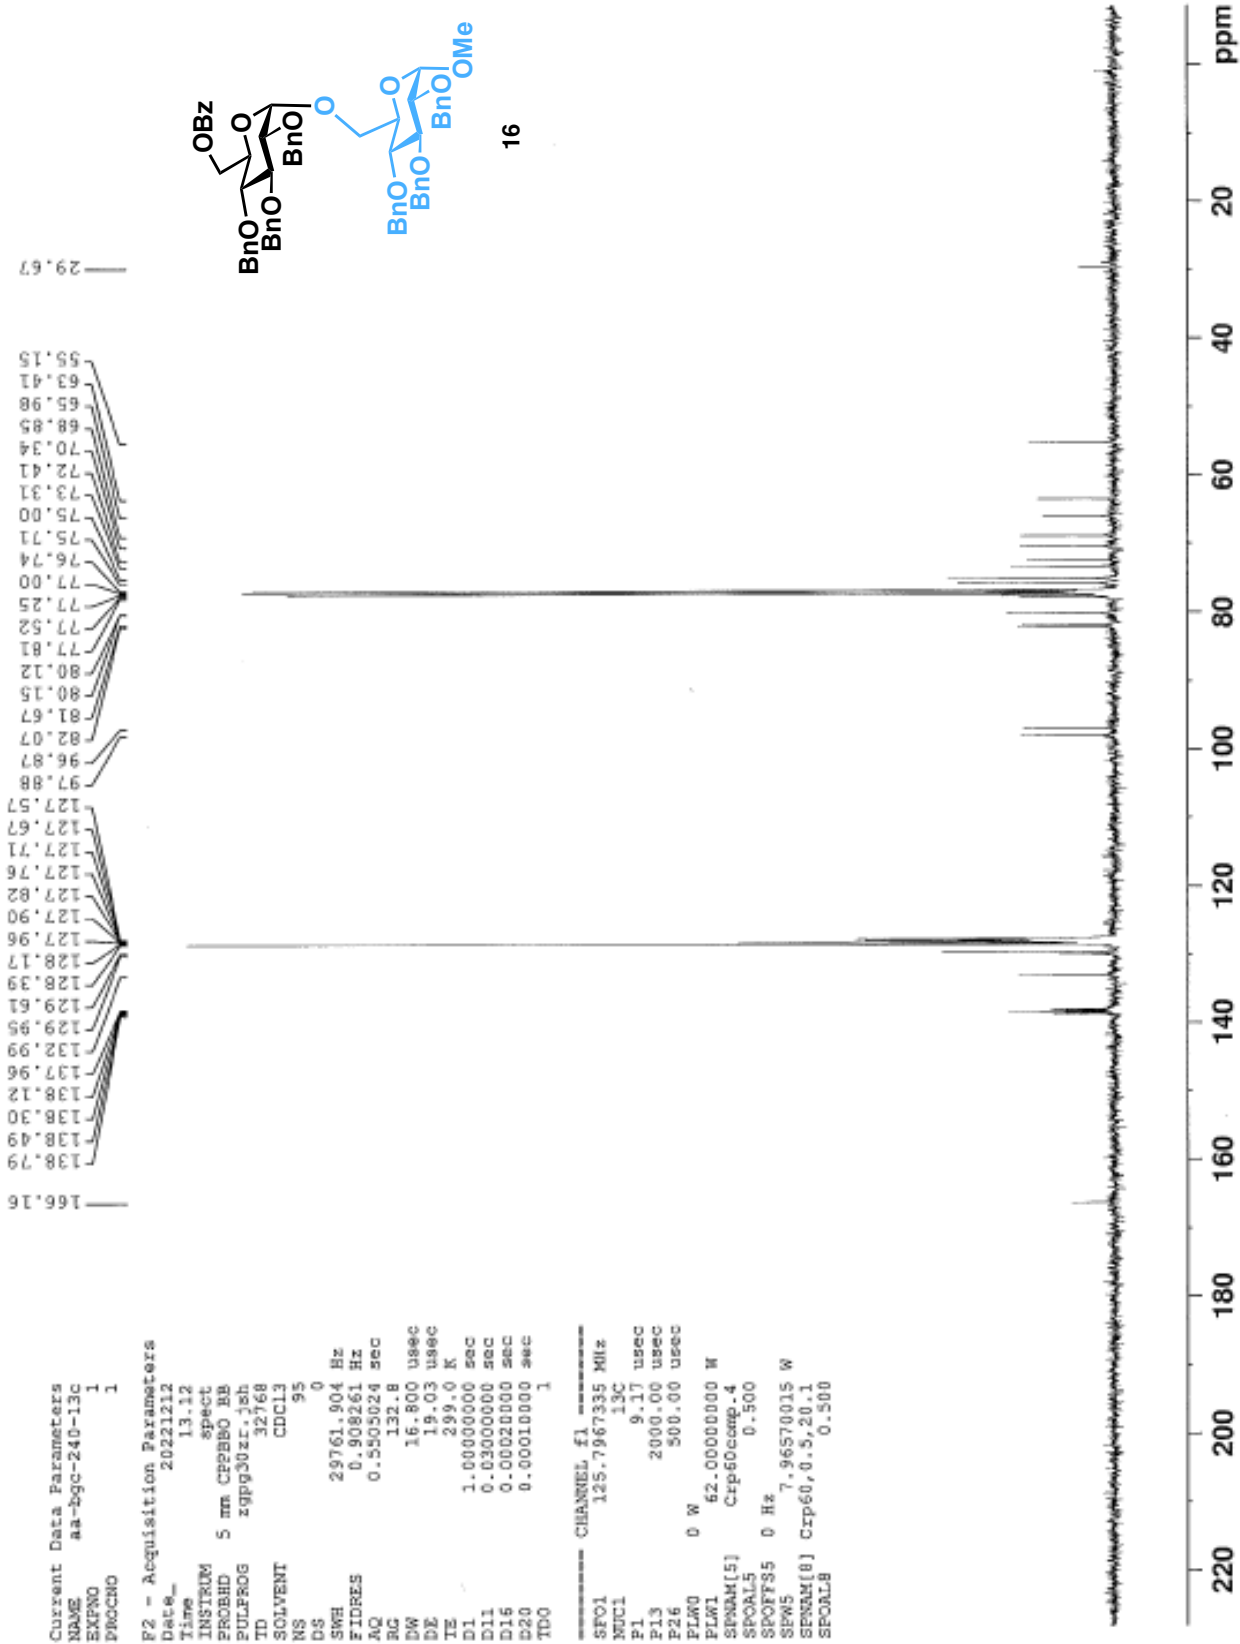

OTBDPS

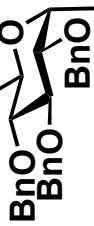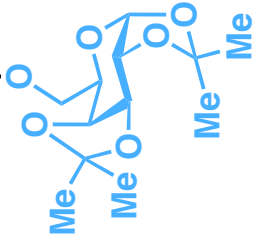

17

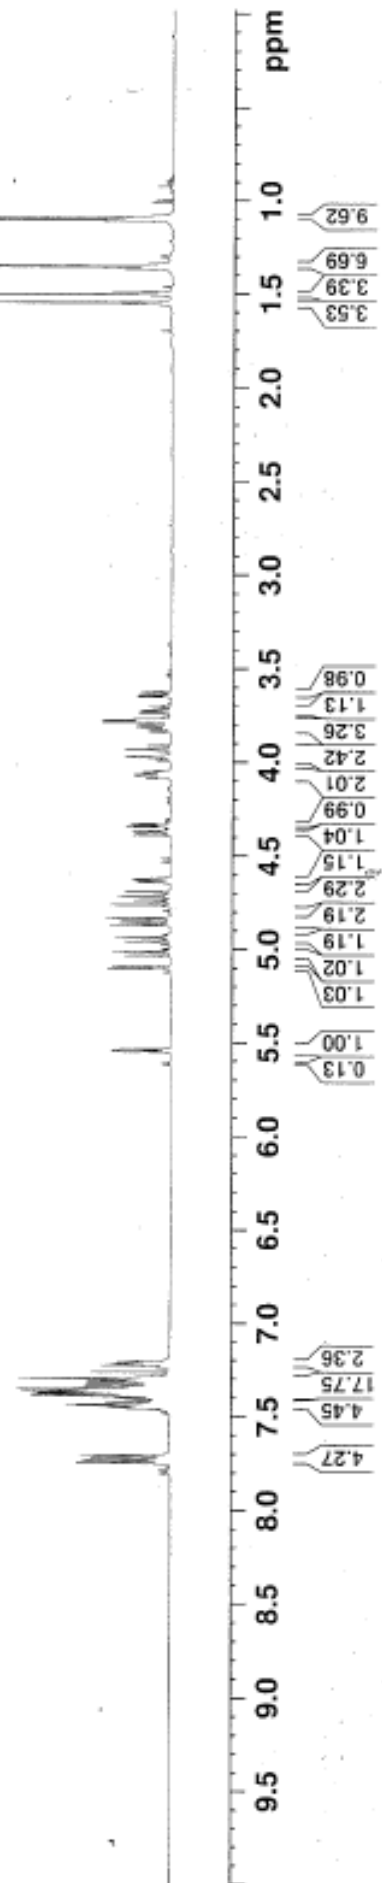

27.07  
26.82  
26.18  
25.48

63.76  
67.16  
69.88  
72.18  
73.09  
75.49  
75.80  
76.75  
77.00  
77.25  
77.82  
80.08  
80.21  
81.22  
81.41  
84.02  
97.55  
105.17  
109.19  
111.87  
127.45  
127.73  
127.97  
128.10  
128.23  
128.35  
128.41  
128.45  
128.58  
129.78  
133.08  
137.48  
138.00  
138.38

166.30

```

Current Data Parameters
NAME az-bgc-290-13c
EXPNO 1
PROCNO 1

F2 - Acquisition Parameters
Date_ 2021122
Time 13.17
INSTRUM spect
PROBHD 5 mm CPTBB0 BB
PULPROG zgpg30xt.j9b
TD 32768
SOLVENT CDC13
NS 128
DS 0
SWH 29761.804 Hz
FIDRES 0.908261 Hz
AQ 0.5505024 sec
RG 132.8
DW 16.800 usec
DE 19.03 usec
TE 296.0 K
D1 1.0000000 sec
D11 0.0300000 sec
D16 0.0002000 sec
D20 0.0001000 sec
TD0 1

===== CHANNEL f1 =====
SFO1 125.7567335 MHz
NUC1 13C
P1 9.17 usec
P13 2000.00 usec
P26 500.00 usec
PLM0 0 W
PLM1 62.00000000 W
SFO1M[5] Crp60comp.4
SFOAL5 0.500
SFOCF55 0 Hz
SFO5 7.96570015 W
SFOAH[8] Crp60,0.5,20.1
SFOAL8 0.500

```

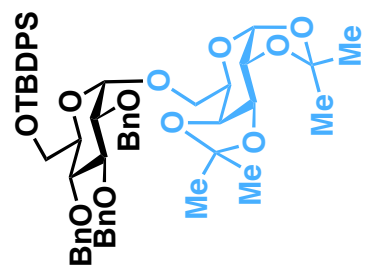

17

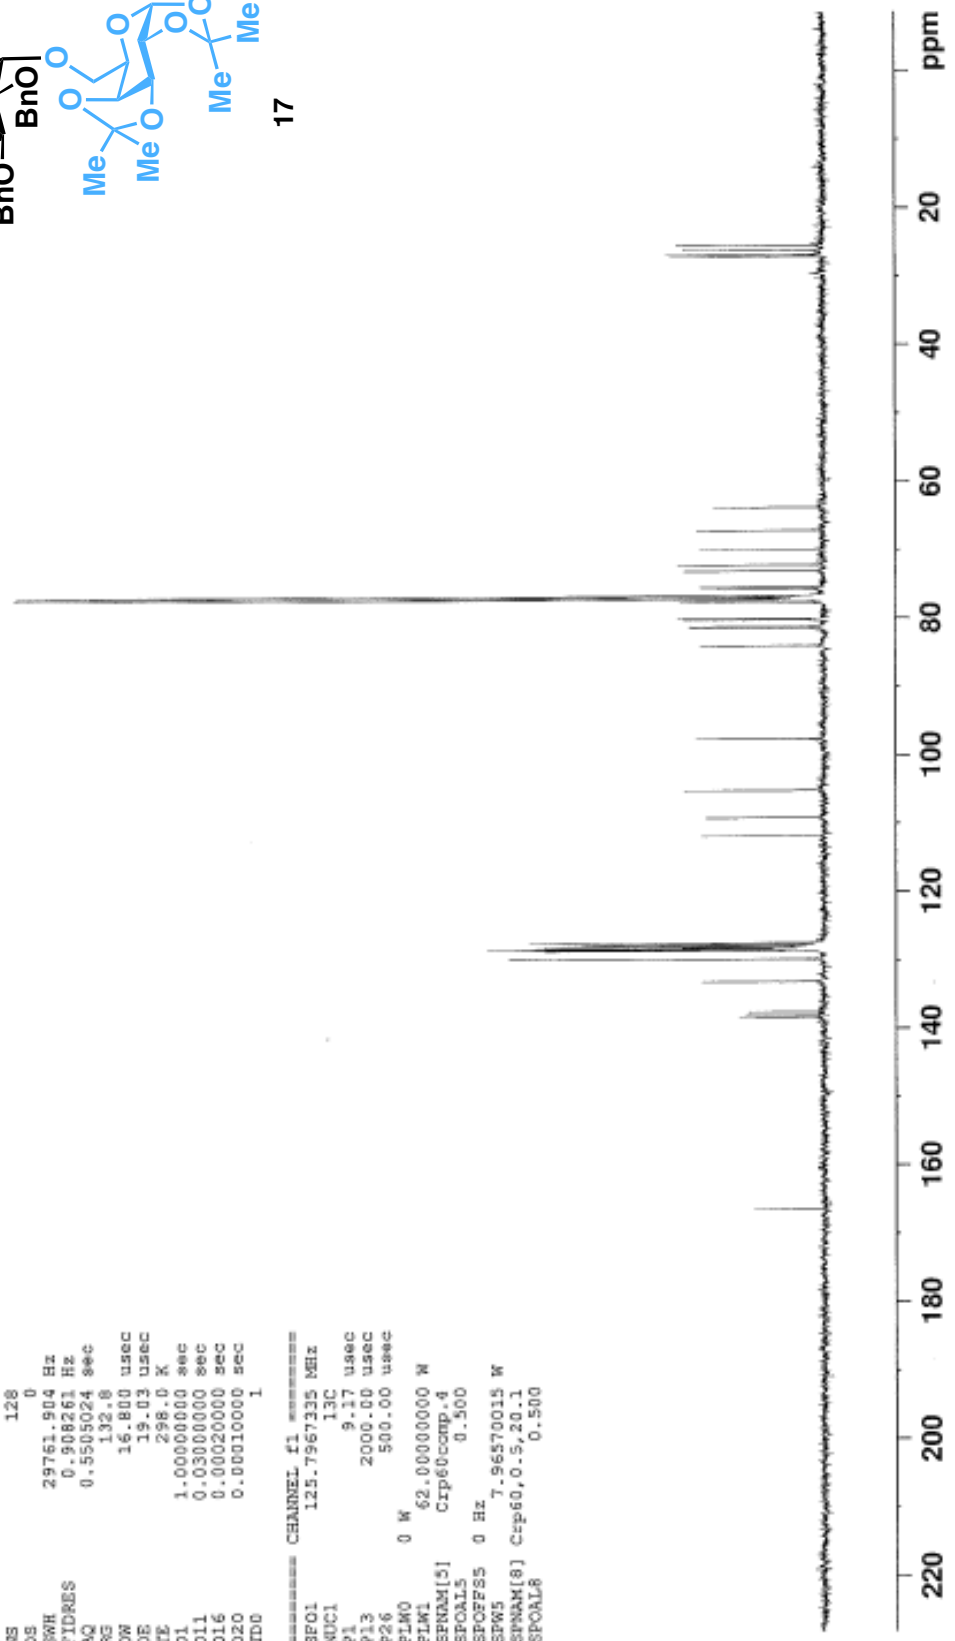

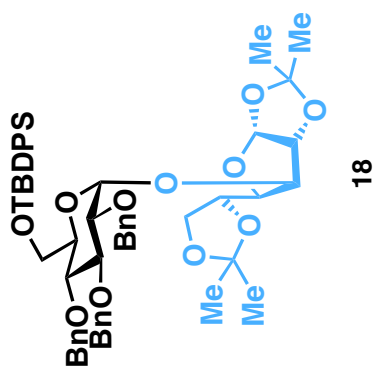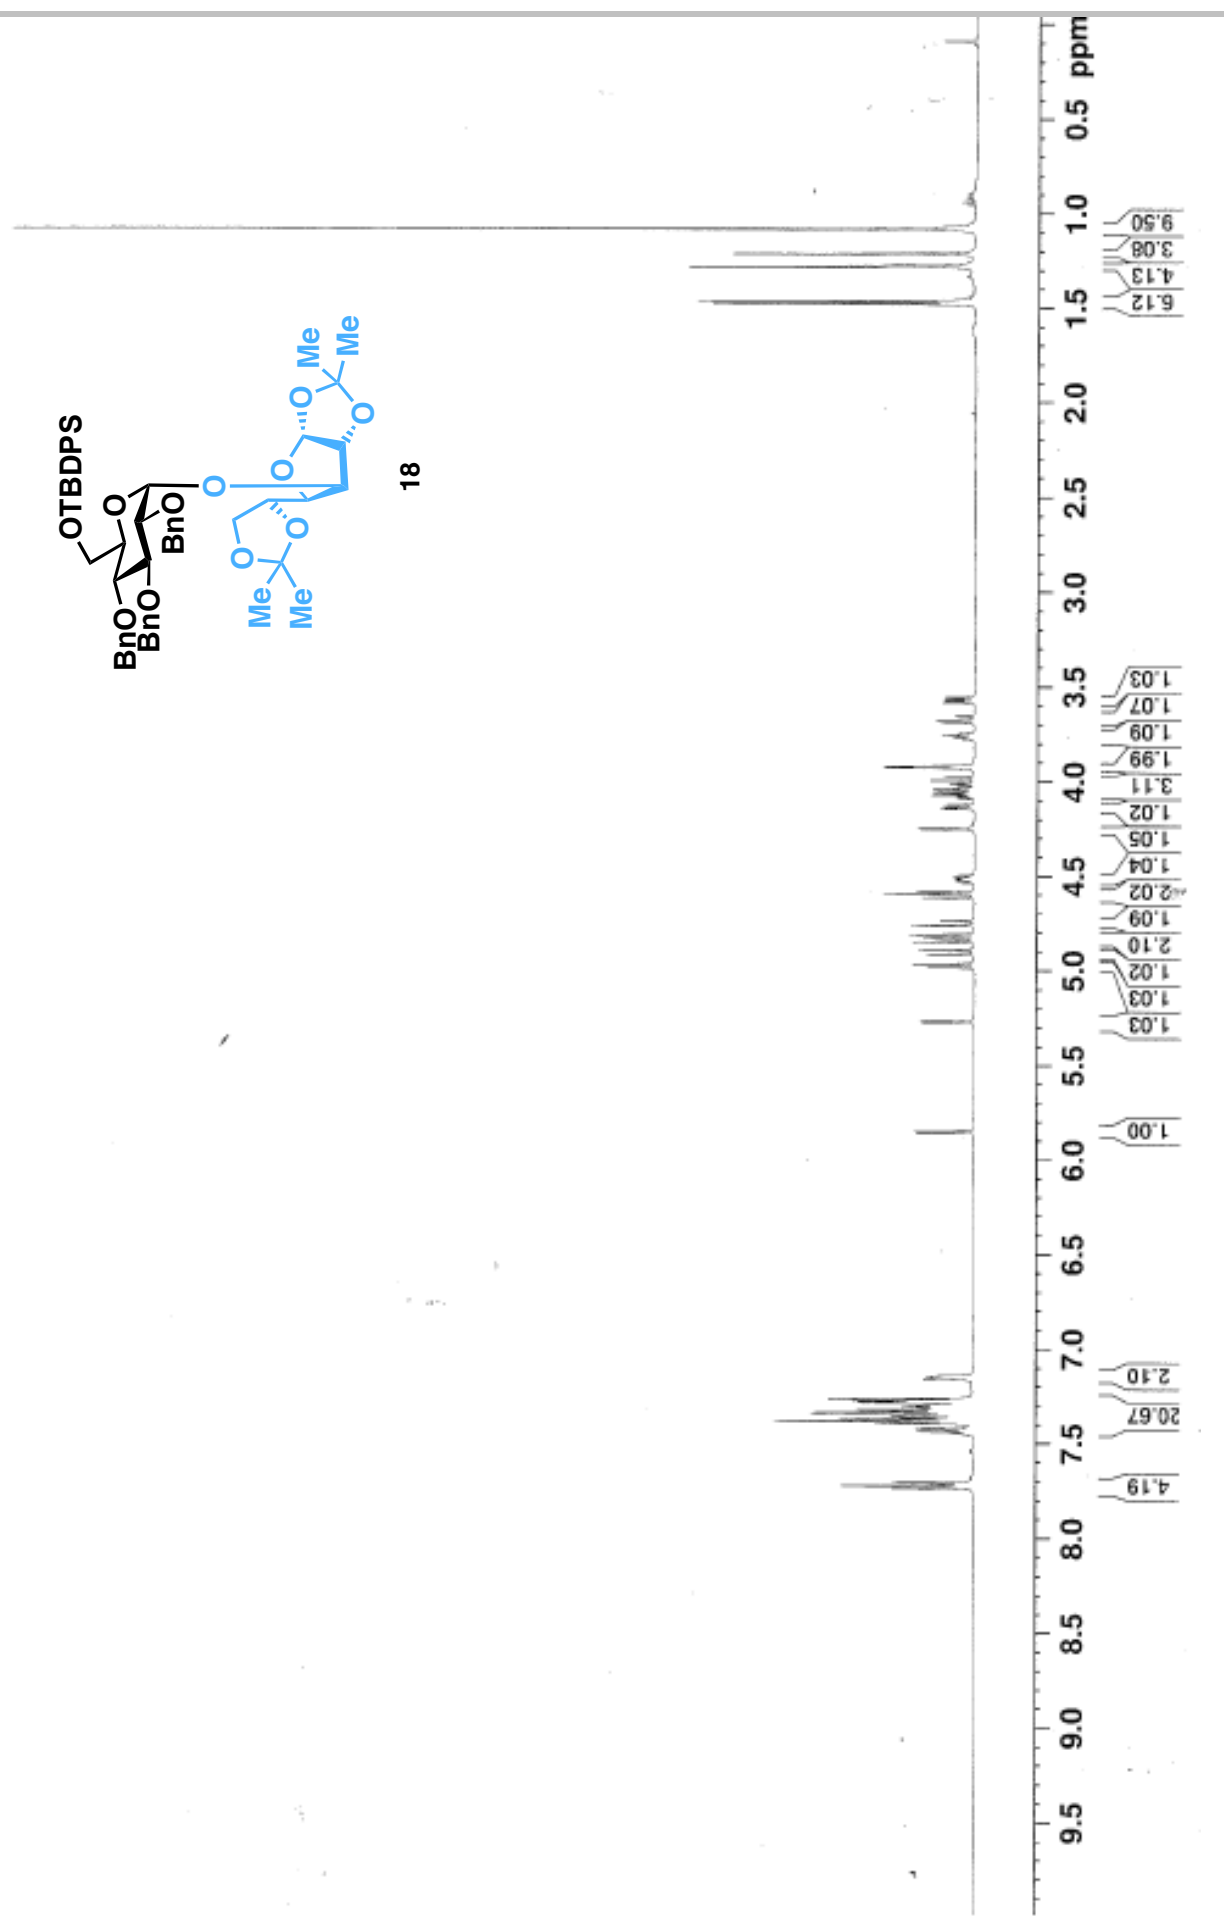

138.59  
 138.27  
 137.97  
 135.80  
 135.66  
 133.43  
 133.17  
 129.65  
 129.60  
 128.45  
 128.41  
 128.38  
 128.04  
 128.02  
 127.82  
 127.69  
 127.64  
 127.59  
 127.41  
 111.82  
 109.07  
 105.13  
 97.78  
 83.83  
 81.49  
 81.22  
 80.43  
 80.27  
 77.69  
 77.25  
 77.00  
 76.75  
 75.77  
 75.40  
 73.16  
 72.66  
 72.31  
 67.07  
 62.91  
 29.68  
 27.06  
 26.84  
 26.26  
 25.47  
 19.27

Current Data Parameters  
 NAME ee-bgc-281-13c  
 EXPNO 1  
 PROCNO 1  
 F2 - Acquisition Parameters  
 Date\_ 20221206  
 Time 10.42  
 INSTRUM spect  
 PROBD 5 mm CFP30 BB  
 PULPROG zgpg30xr.jsh  
 TD 32768  
 SOLVENT CDCl3  
 NS 128  
 DS 0  
 SMH 29761.904 Hz  
 FIDRES 0.908261 Hz  
 AQ 0.5505024 sec  
 RG 132.8  
 DM 16.800 usec  
 DE 19.03 usec  
 TE 298.0 K  
 D1 1.00000000 sec  
 D11 0.03000000 sec  
 D16 0.00020000 sec  
 D20 0.00010000 sec  
 TD0 1  
 CHANNEL f1  
 SFO1 125.7967395 MHz  
 NUC1 13C  
 P1 9.17 usec  
 F1 2000.00 usec  
 P2 500.00 usec  
 PLMO 0 W  
 PLM1 62.00000000 W  
 SPMAM(S) Cfp60comp-4  
 SPOALS 0 Hz  
 SPOFFS 0 Hz  
 SPWS 7.96570015 W  
 SPMAM(S) Cfp60.0.5.20.1  
 SPOALS 0.500

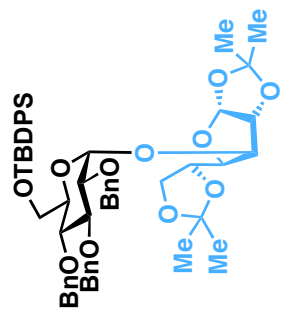

18

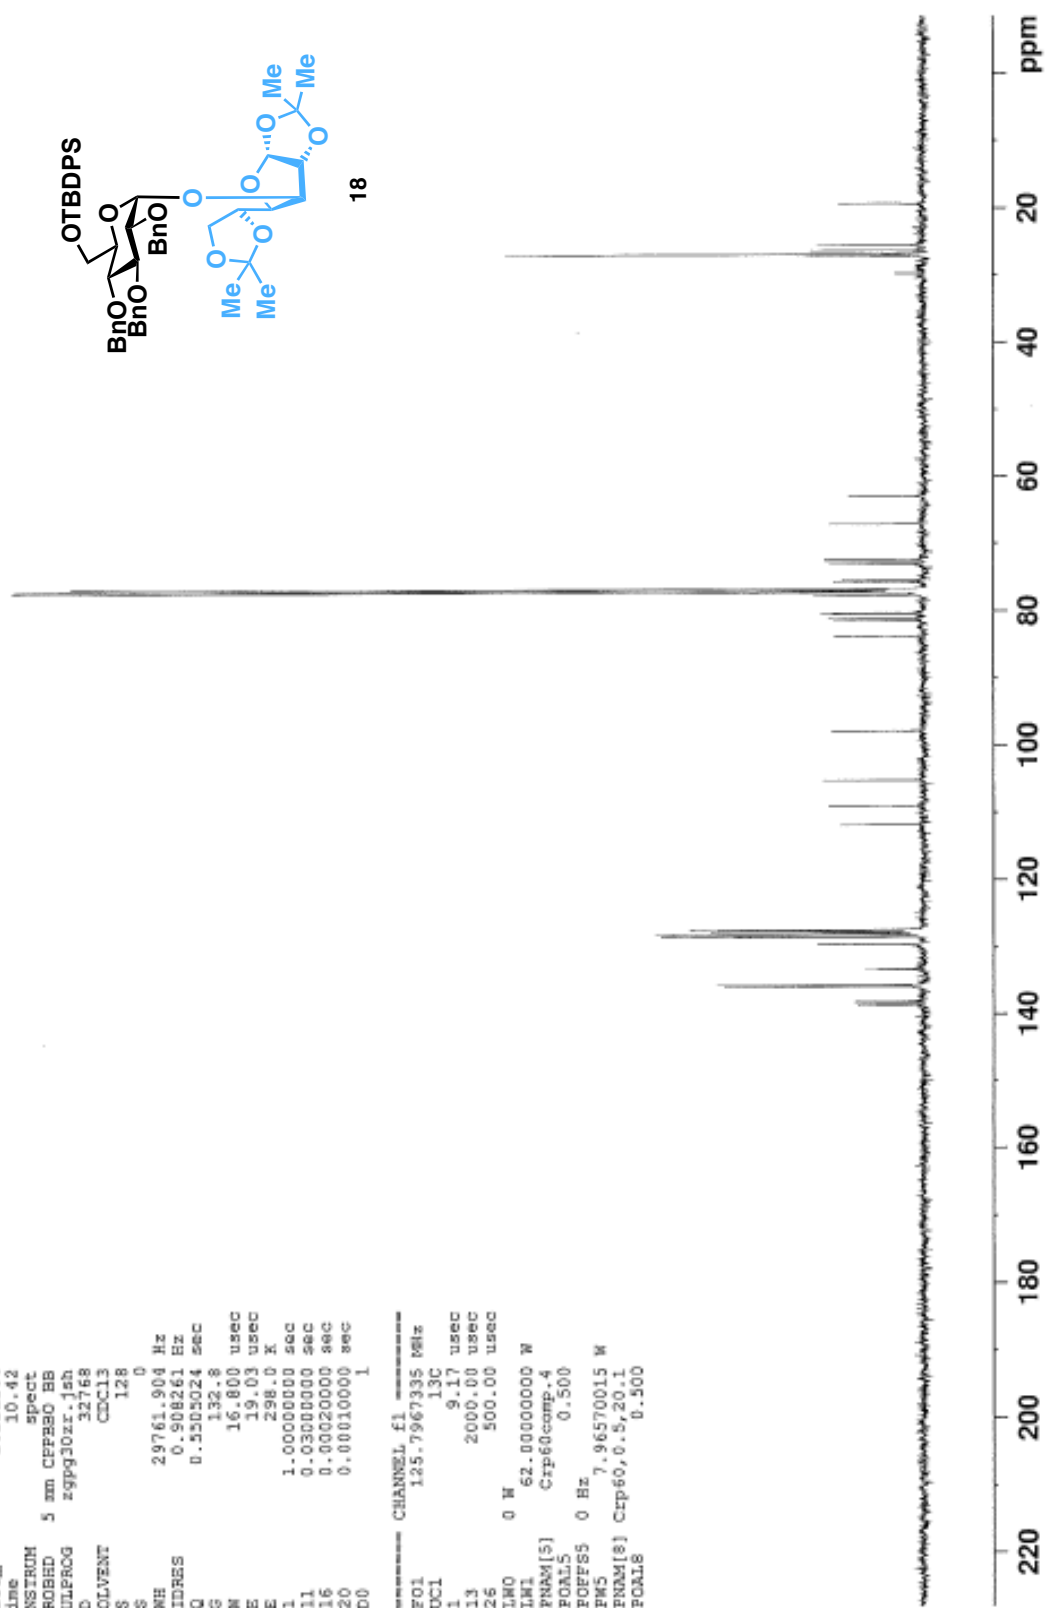



cfe\_vii\_191\_2 1 1 /home/localnmr/cenlow/nmr

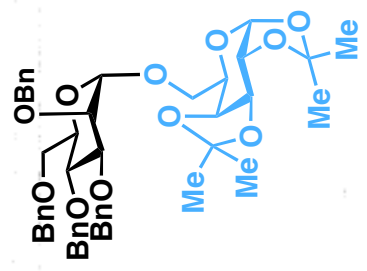

19

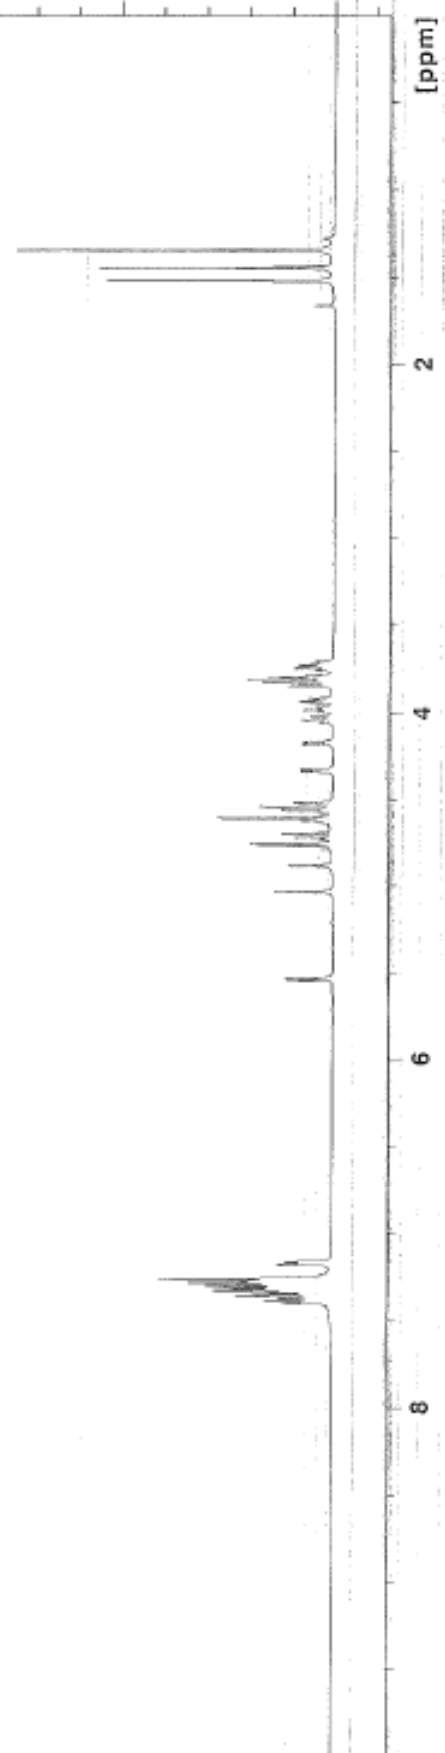

cre\_vii\_191\_3\_1\_1 /home/localnmr/cenlow/nmr

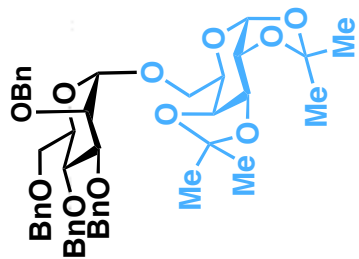

19

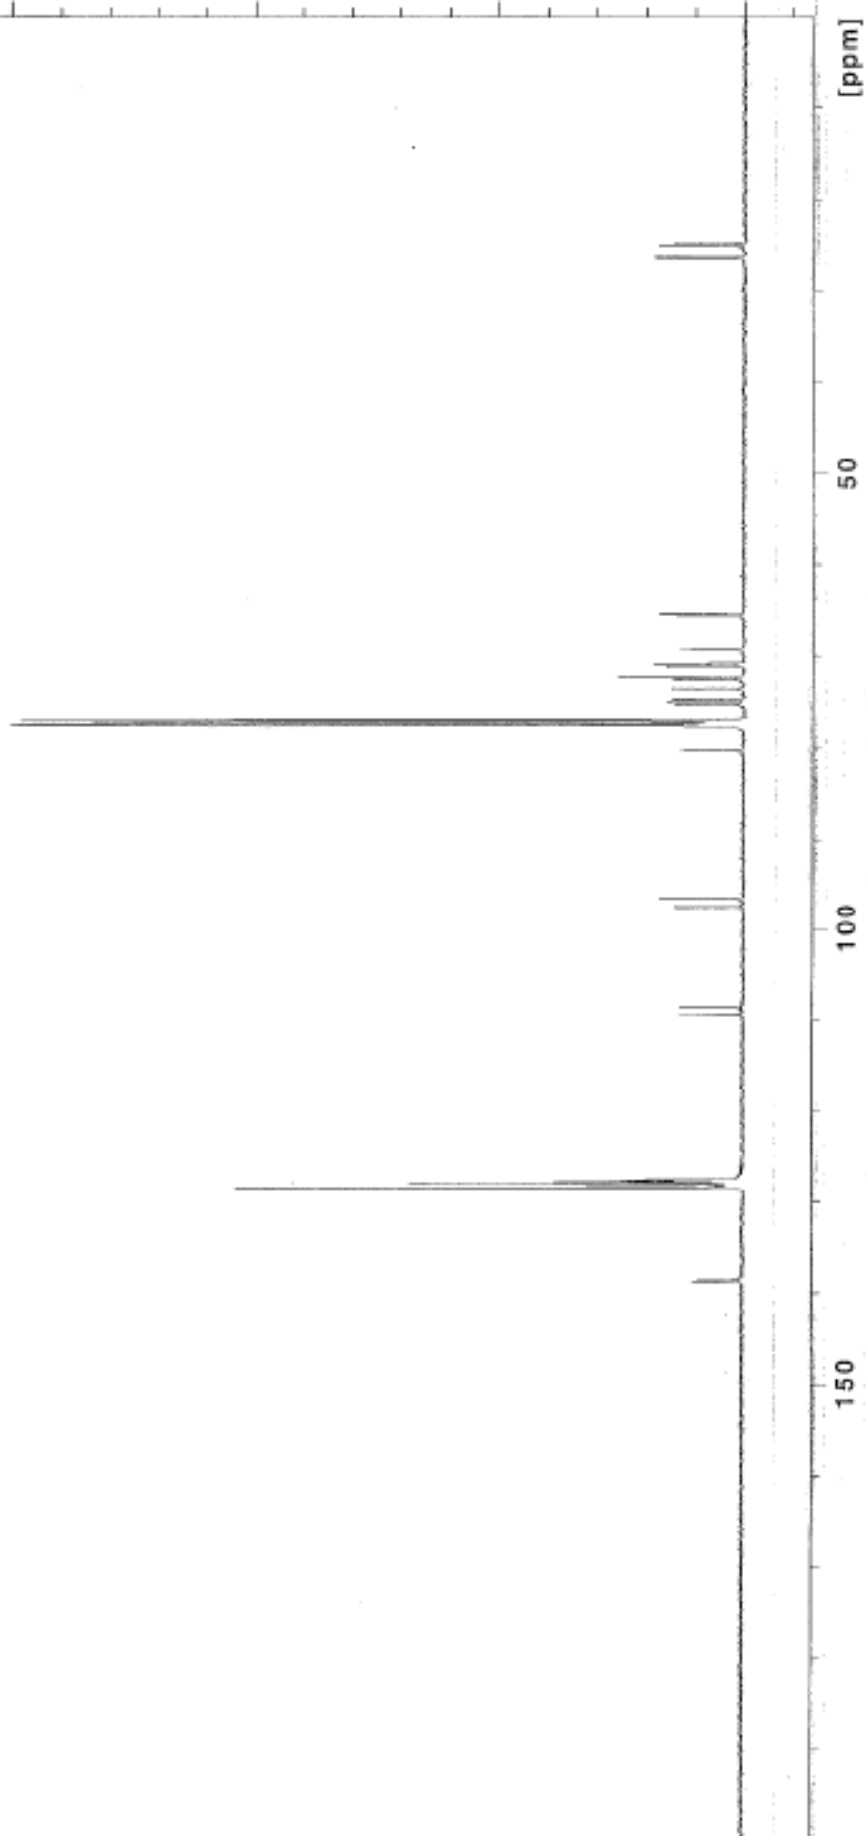



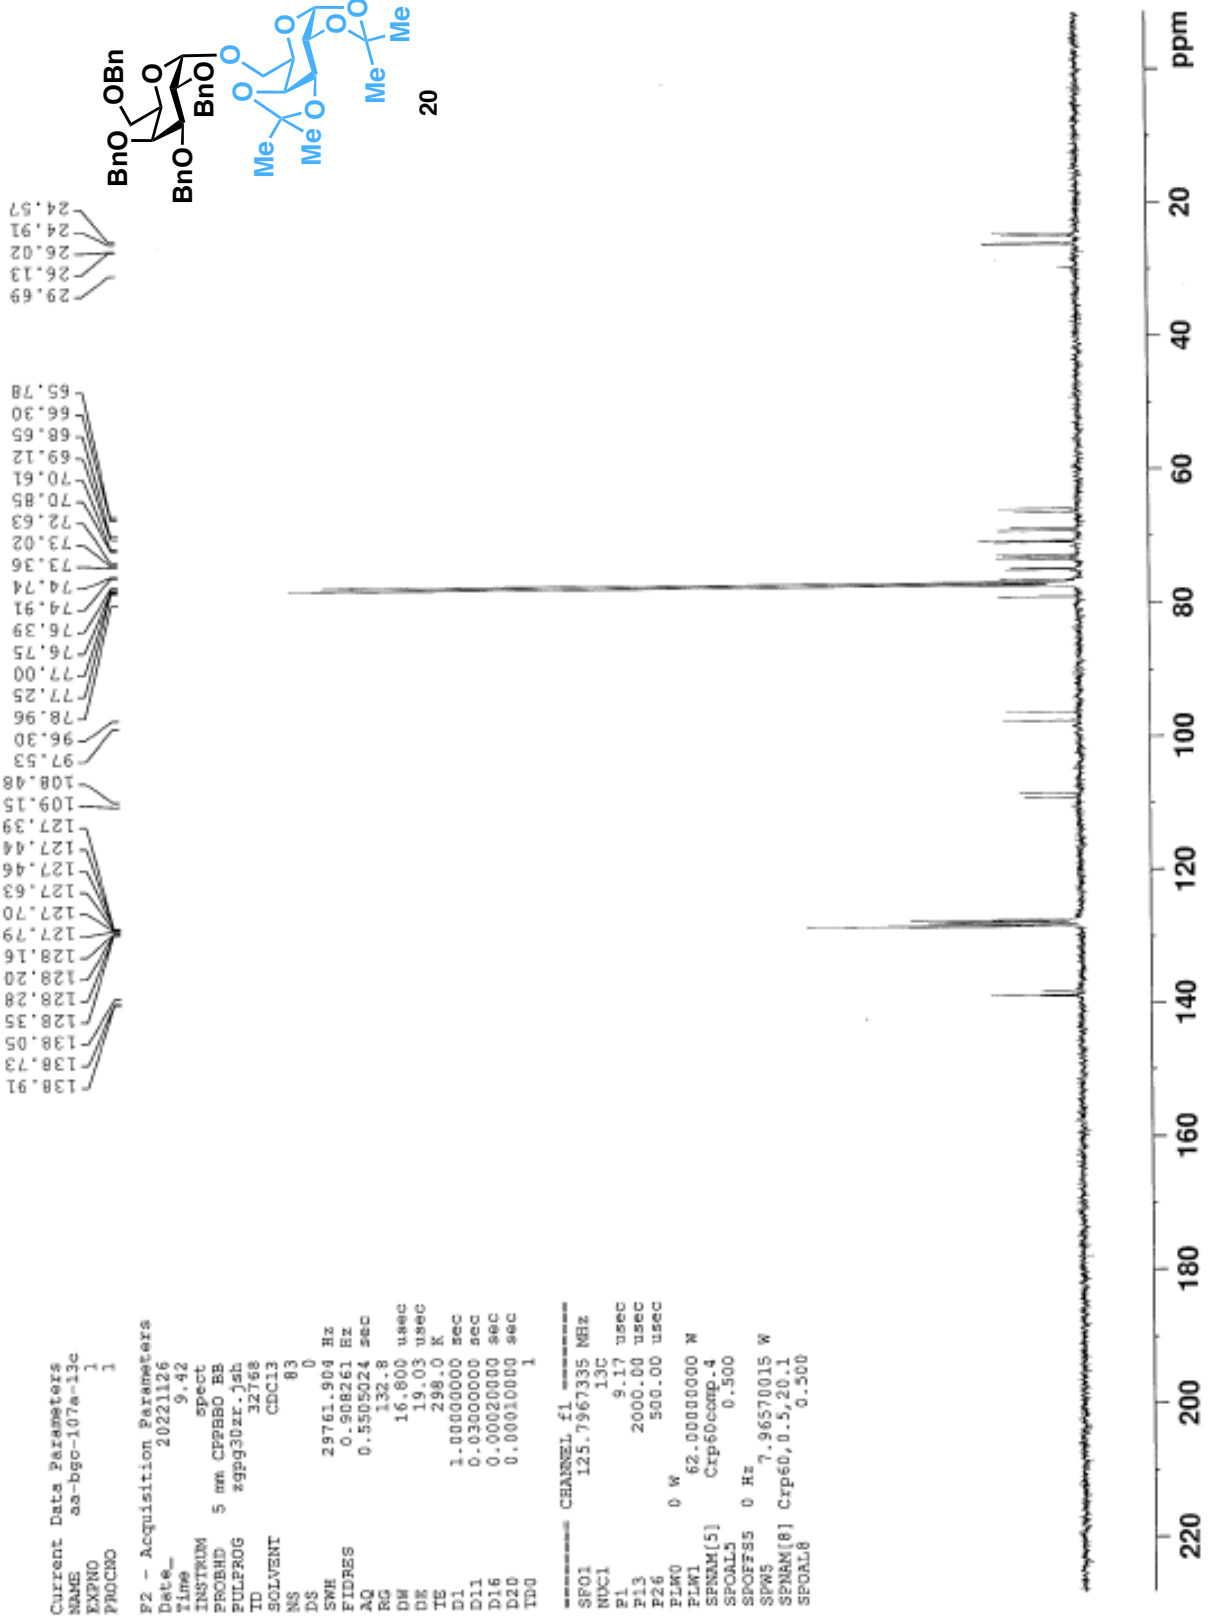

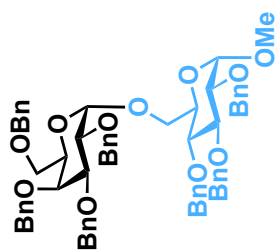

21

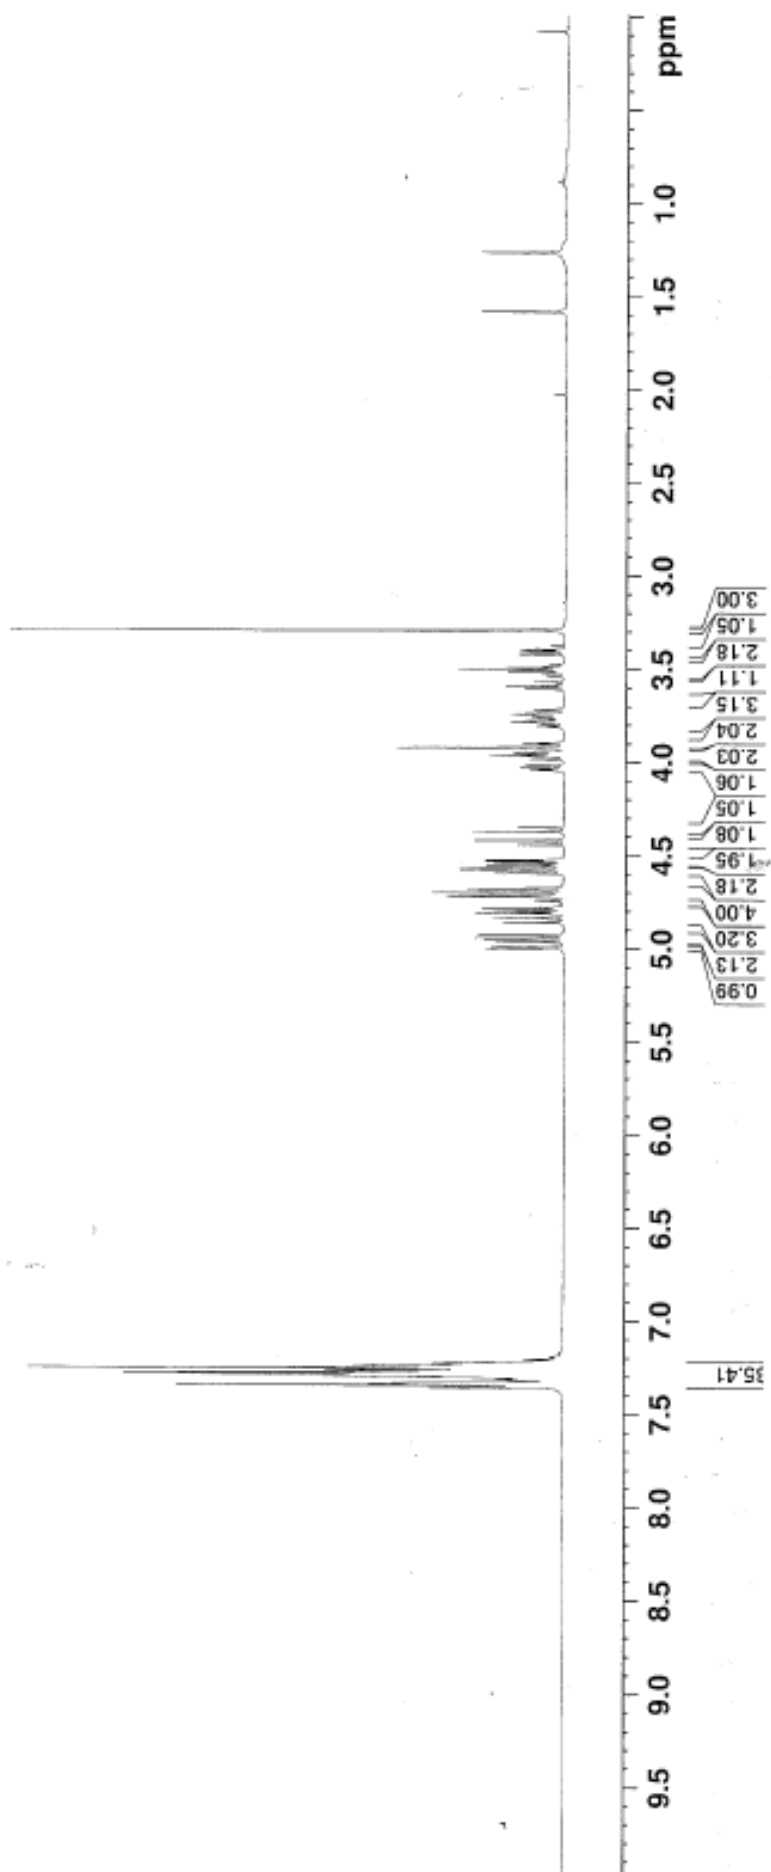

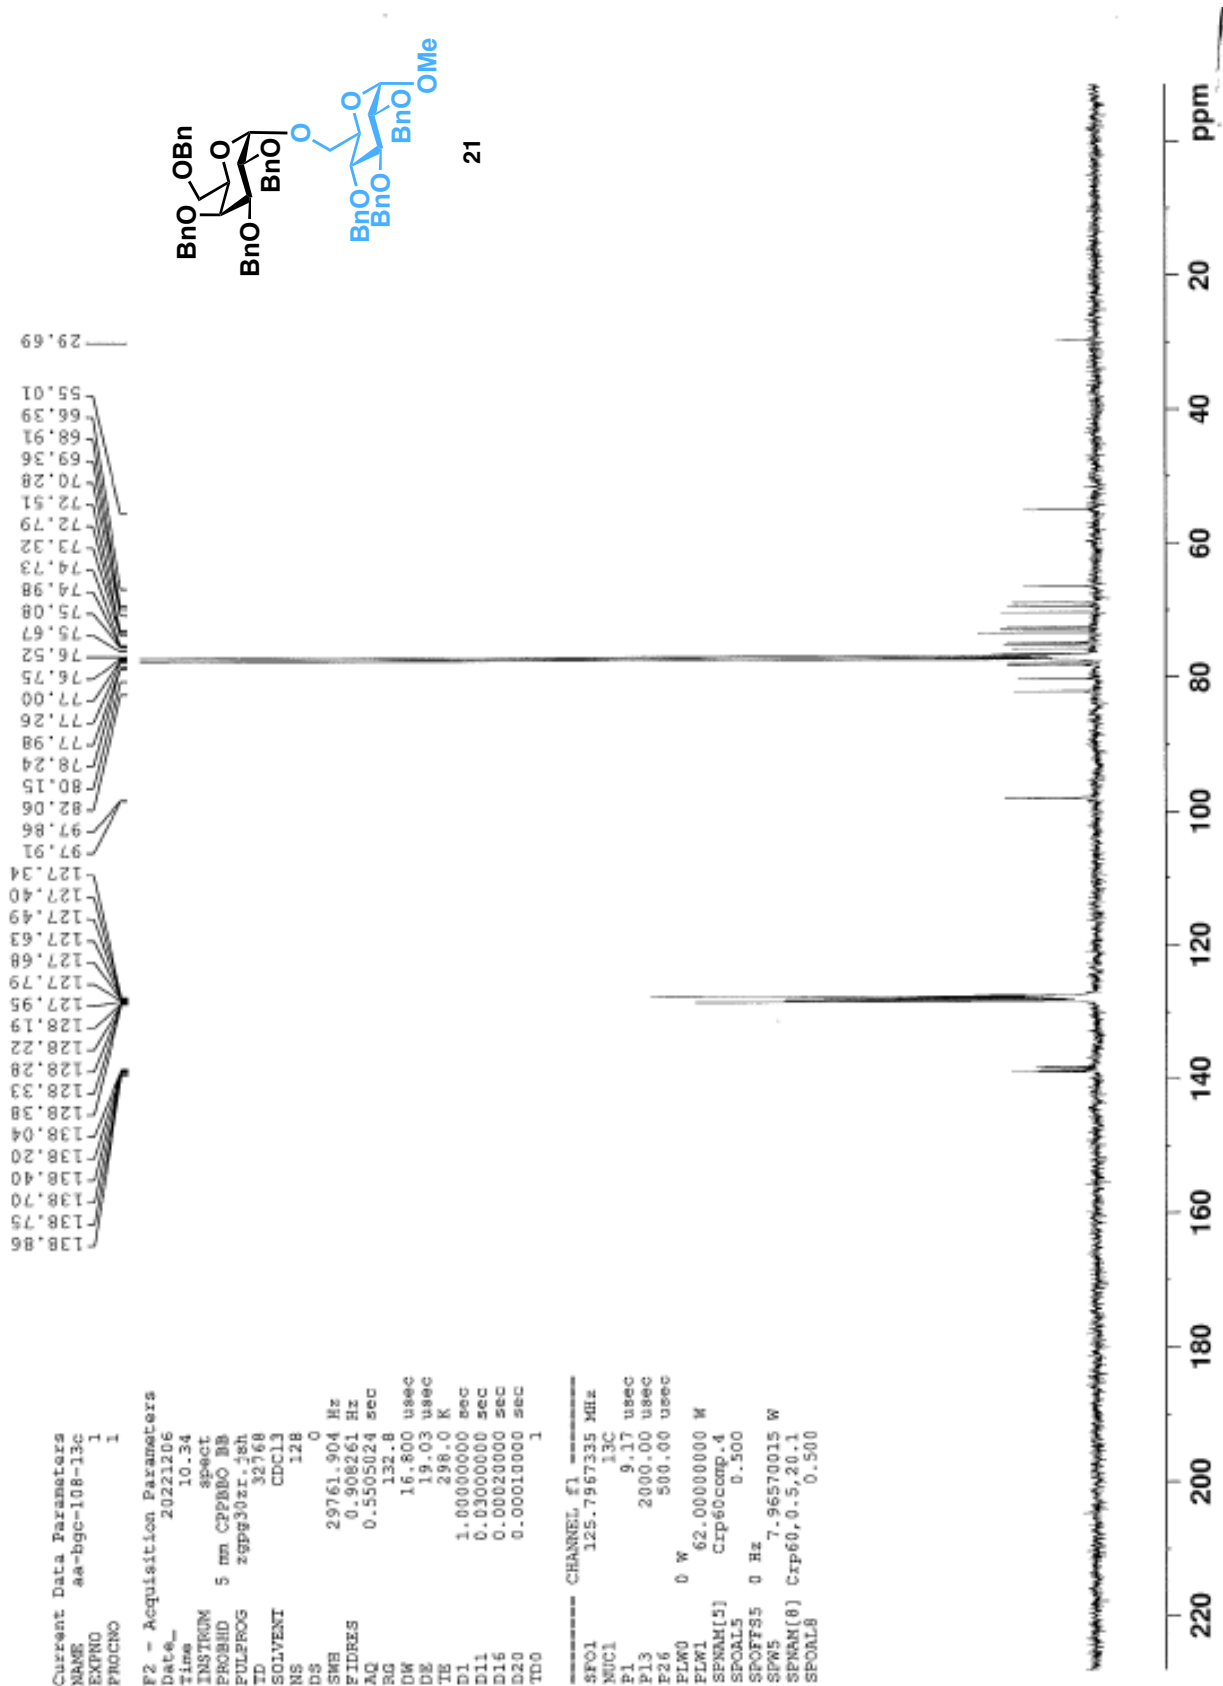

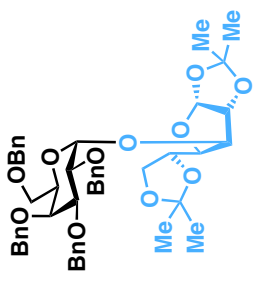

22

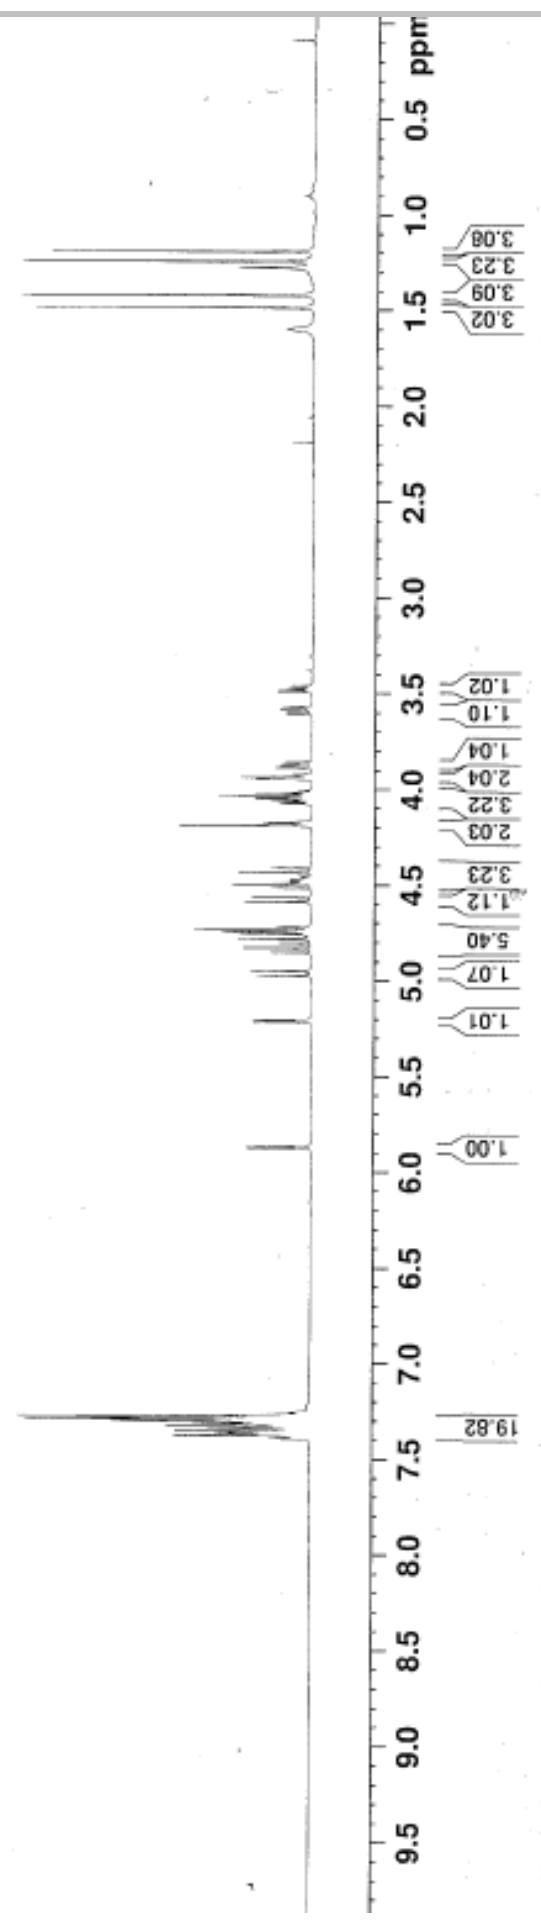





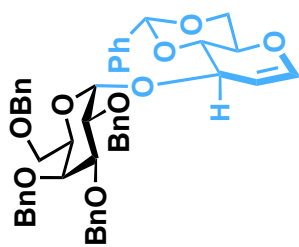

23

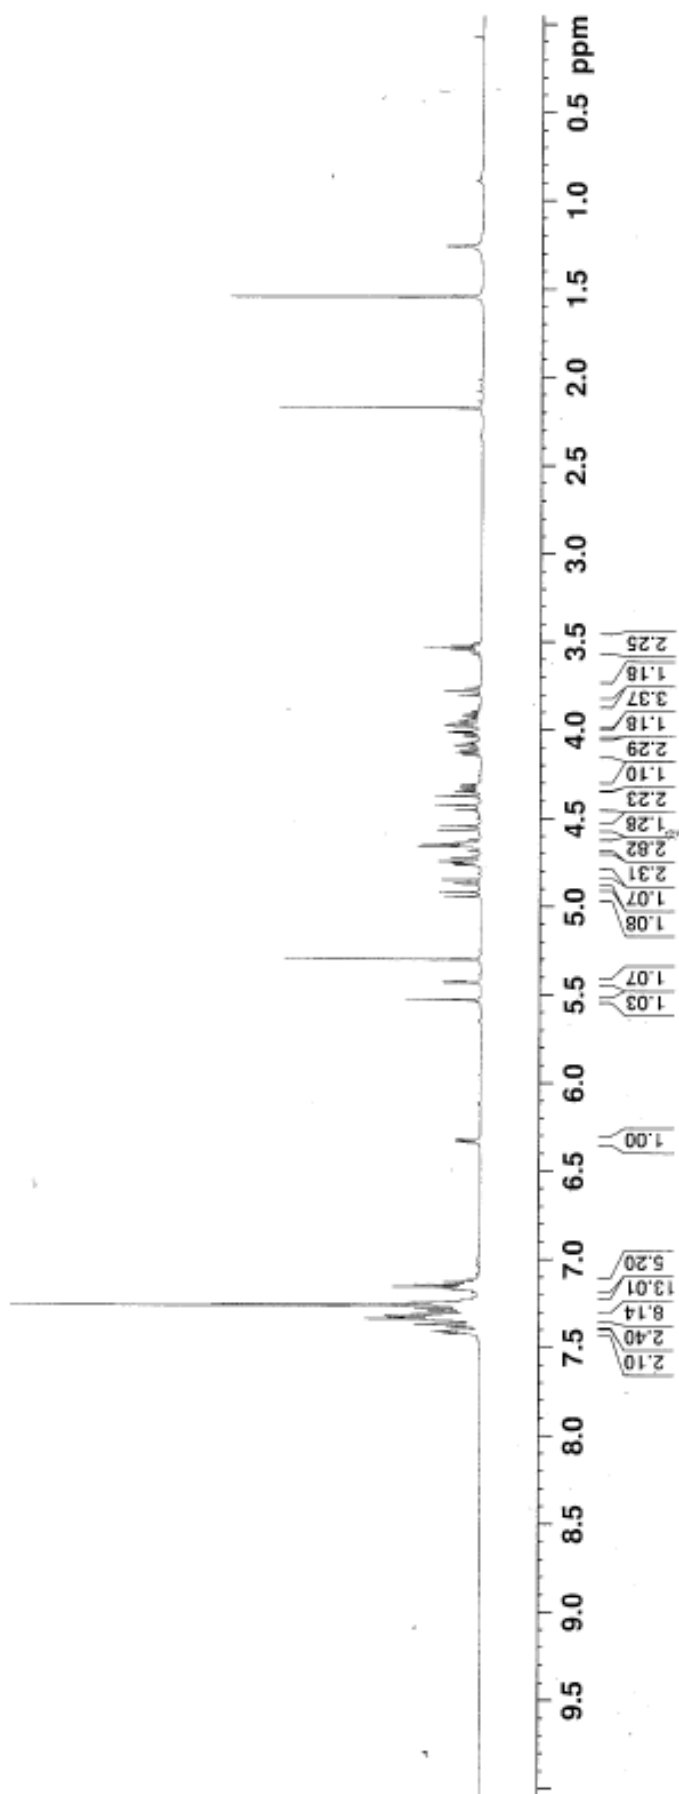

144.99  
138.91  
138.63  
138.45  
137.96  
137.12  
129.09  
128.37  
128.30  
128.18  
127.89  
127.78  
127.71  
127.52  
127.46  
127.38  
127.33  
126.10  
102.52  
101.35  
97.09  
79.68  
79.42  
78.91  
78.68  
77.26  
77.00  
76.75  
75.92  
75.08  
74.76  
74.48  
73.50  
73.23  
72.28  
71.52  
69.67  
69.17  
68.81  
68.36

Current Data Parameters  
 NAME aa-bgc-189b-13c  
 EXPNO 1  
 PROCNO 1

F2 - Acquisition Parameters  
 Date\_ 20221219  
 Time 12.24  
 INSTRUM spect  
 PROBHD 5 mm CFP60 BB  
 PULPROG zgpg30zt\_1sb  
 ID 32168  
 SOLVENT CDC13  
 NS 317  
 DS 0  
 SWH 29761.904 Hz  
 FIDRES 0.908261 Hz  
 AQ 0.5505024 sec  
 RG 132.8  
 DW 16.800 usec  
 DE 19.03 usec  
 TE 299.0 K  
 D1 1.00000000 sec  
 D11 0.03000000 sec  
 D16 0.00020000 sec  
 D20 0.00010000 sec  
 TD0 1

CHANNEL F1  
 SF01 125.7967335 MHz  
 NU01 13C  
 P1 9.17 usec  
 P13 2000.00 usec  
 P26 500.00 usec  
 PLW0 0 W  
 PLW1 62.00000000 W  
 SFNAM[5] Cfp60comp\_A  
 SFOALS 0.500  
 SPOFFS 0 Hz  
 SPM5 7.96570015 W  
 SPM8 Cfp60,0.5,20.1  
 SFOALS 0.500

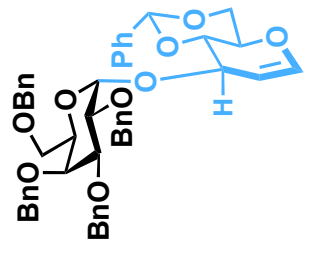

23

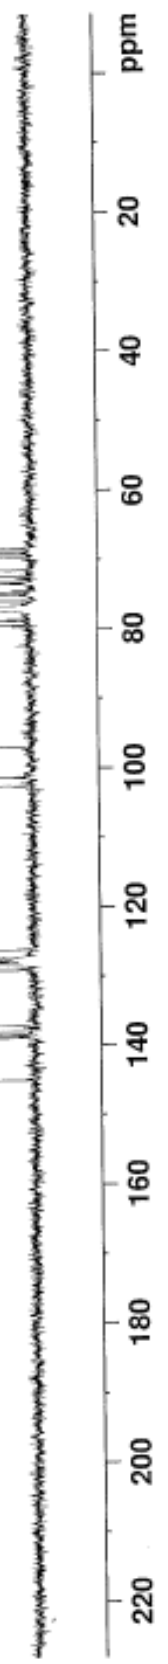

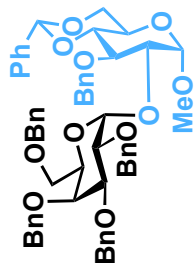

24

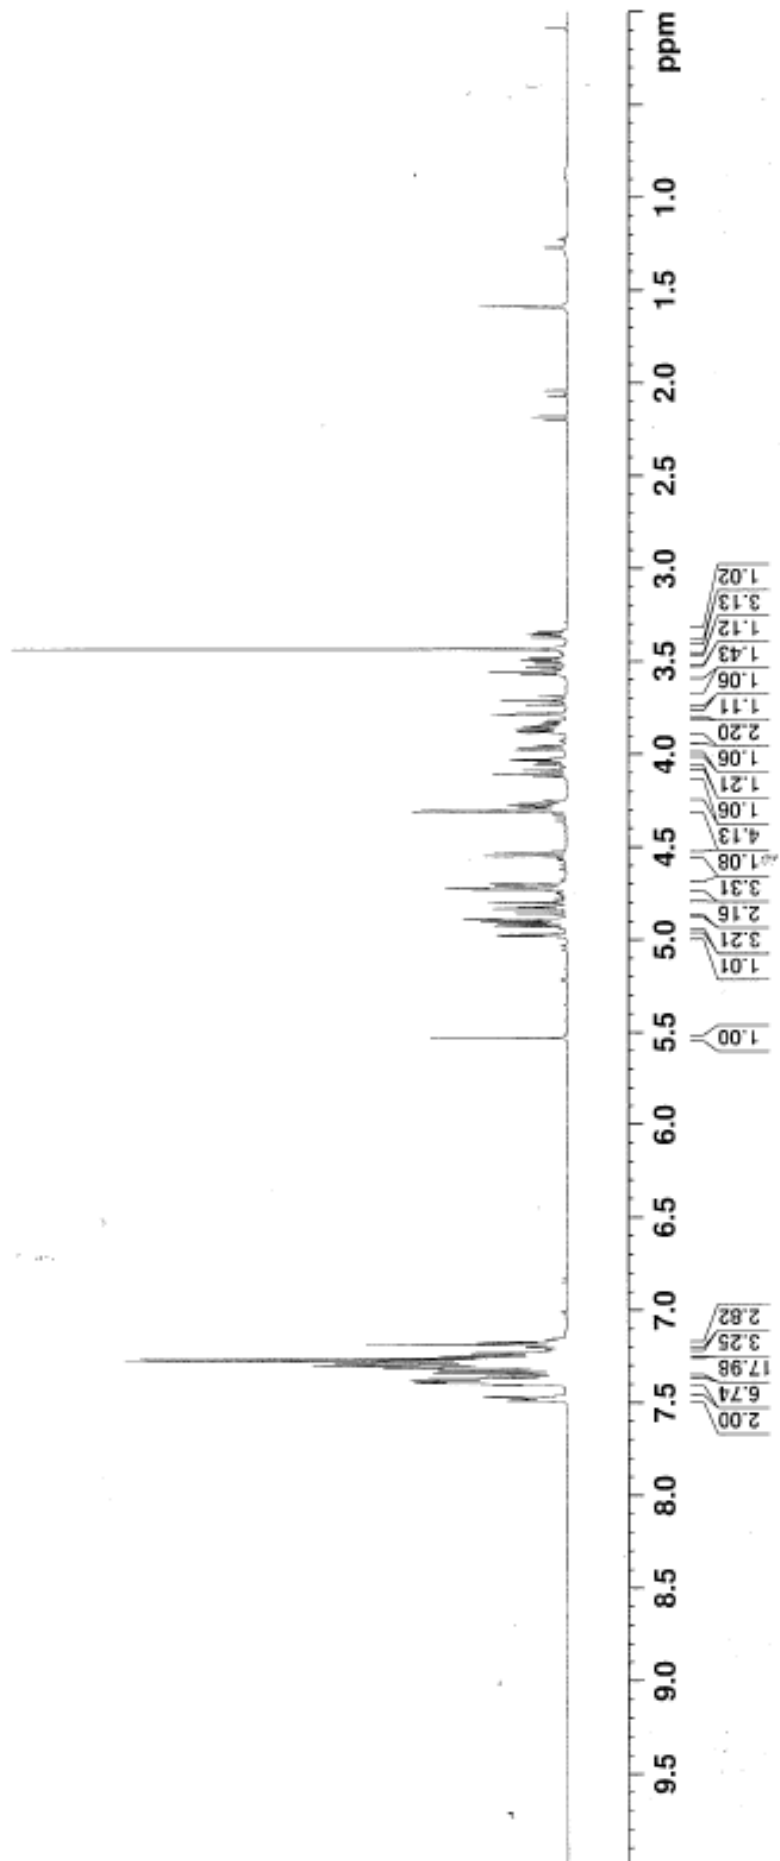

139.86  
139.68  
139.42  
137.40  
128.87  
128.35  
128.25  
128.15  
128.09  
127.88  
127.56  
127.48  
127.44  
127.38  
125.98  
101.17  
97.36  
94.88  
82.39  
78.83  
77.26  
77.00  
76.75  
75.94  
75.34  
74.98  
74.72  
74.34  
72.78  
69.04  
68.95  
68.84  
62.29  
55.06

Current Data Parameters  
NAME aa-bgc-190a-13c  
EXPNO 1  
PROCNO 1

F2 - Acquisition Parameters

Date\_ 20221129  
Time 10.43  
INSTRUM spect  
PROBHD 5 mm CFBBO BB  
PULPROG zgpg30xt\_1sh  
ID 32768  
SOLVENT CDCl3  
NS 110  
DS 0  
SWH 29761.904 Hz  
FIDRES 0.908261 Hz  
AQ 0.5505024 sec  
RG 132.8  
DW 16.800 usec  
DE 19.03 usec  
TE 298.0 K  
D1 1.00000000 sec  
D11 0.03000000 sec  
D16 0.00020000 sec  
D20 0.00010000 sec  
TD0 1

CHANNEL f1  
SFO1 125.7567335 MHz  
NUC1 13C  
P1 9.17 usec  
PL1 2000.00 usec  
P26 500.00 usec  
PLW0 0 W  
PLW1 62.00000000 W  
SFOAL5 Crp60comp.4  
SFOALS 0.500  
SFOFFS5 0 Hz  
SFOFS 7.96570015 W  
SFOFM[0] Crp60,0.5,20.1  
SFOAL8 0.500

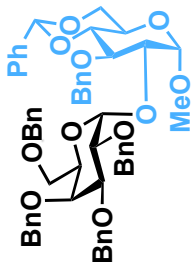

24

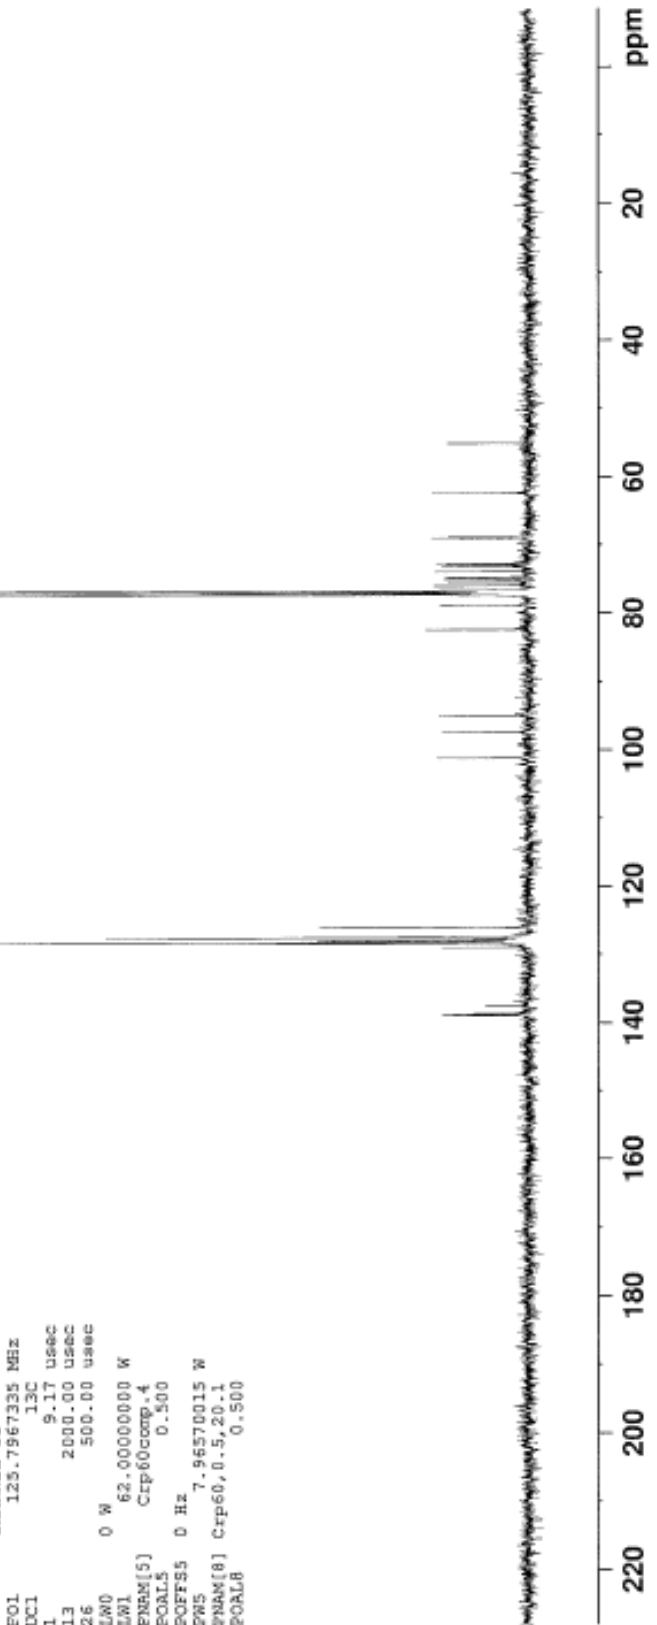

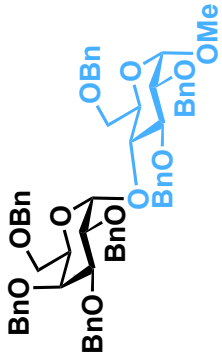

25

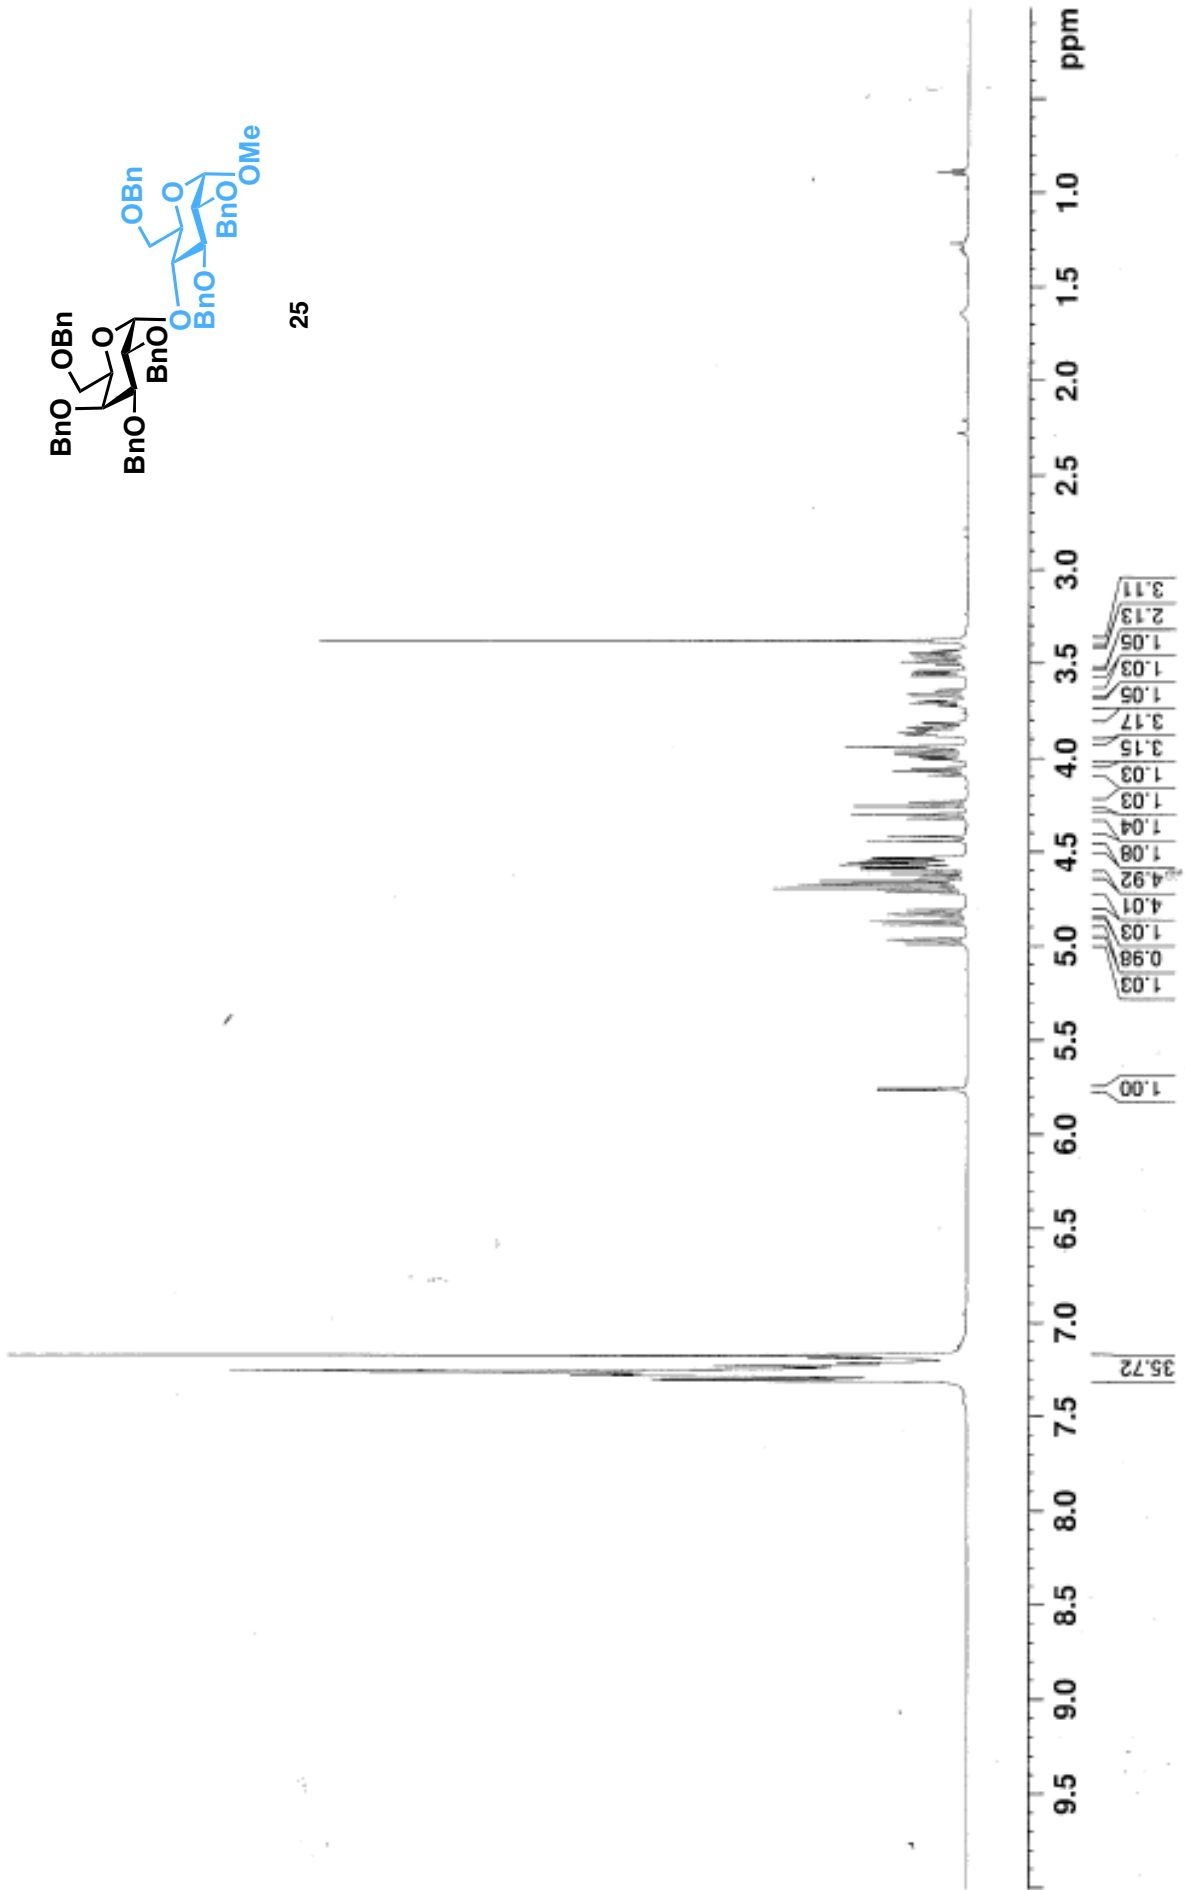

138.94  
138.57  
138.32  
138.23  
137.96  
128.35  
128.28  
128.22  
128.16  
127.83  
127.72  
127.64  
127.53  
127.46  
127.40  
127.32  
126.98  
126.68  
97.68  
97.43  
81.97  
80.12  
79.12  
77.25  
77.00  
76.74  
75.59  
74.72  
74.60  
74.29  
73.74  
73.37  
73.32  
73.02  
72.72  
69.82  
69.43  
69.39  
68.64  
55.04

Current Data Parameters  
 NAME bqc-03-186c-13c  
 EXPNO 1  
 FPROGNO 1  
 F2 - Acquisition Parameters  
 Date\_ 20230420  
 Time\_ 12.09  
 INSTRUM spect  
 PROBD 5 mm CPBBB BB  
 PULPROG zgpg30zt.jah  
 TD 32768  
 SOLVENT CDCl3  
 NS 22  
 DS 0  
 SWH 23761.904 Hz  
 FIDRES 0.908261 Hz  
 AQ 0.5505024 sec  
 RG 132.8  
 DW 16.800 usec  
 DE 19.03 usec  
 TE 299.0 K  
 D1 1.00000000 sec  
 D11 0.03000000 sec  
 D16 0.00020000 sec  
 D20 0.00010000 sec  
 TD0 1  
 CHANNEL f1  
 SF01 125.7967335 MHz  
 NUC1 13C  
 P1 9.17 usec  
 P13 2000.00 usec  
 P26 500.00 usec  
 PLW0 0 W  
 PLW1 62.00000000 W  
 SPNAM[5] Crp60comp.4  
 SFOALS 0.500  
 SPOFFS5 0 Hz  
 SPNS 7.96570015 W  
 SPNAM[8] Crp60.0.5.20.1  
 SFOALS8 0.500

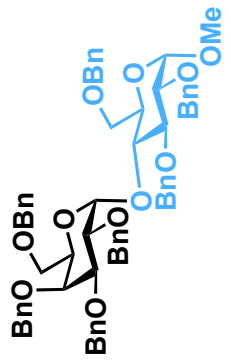

25

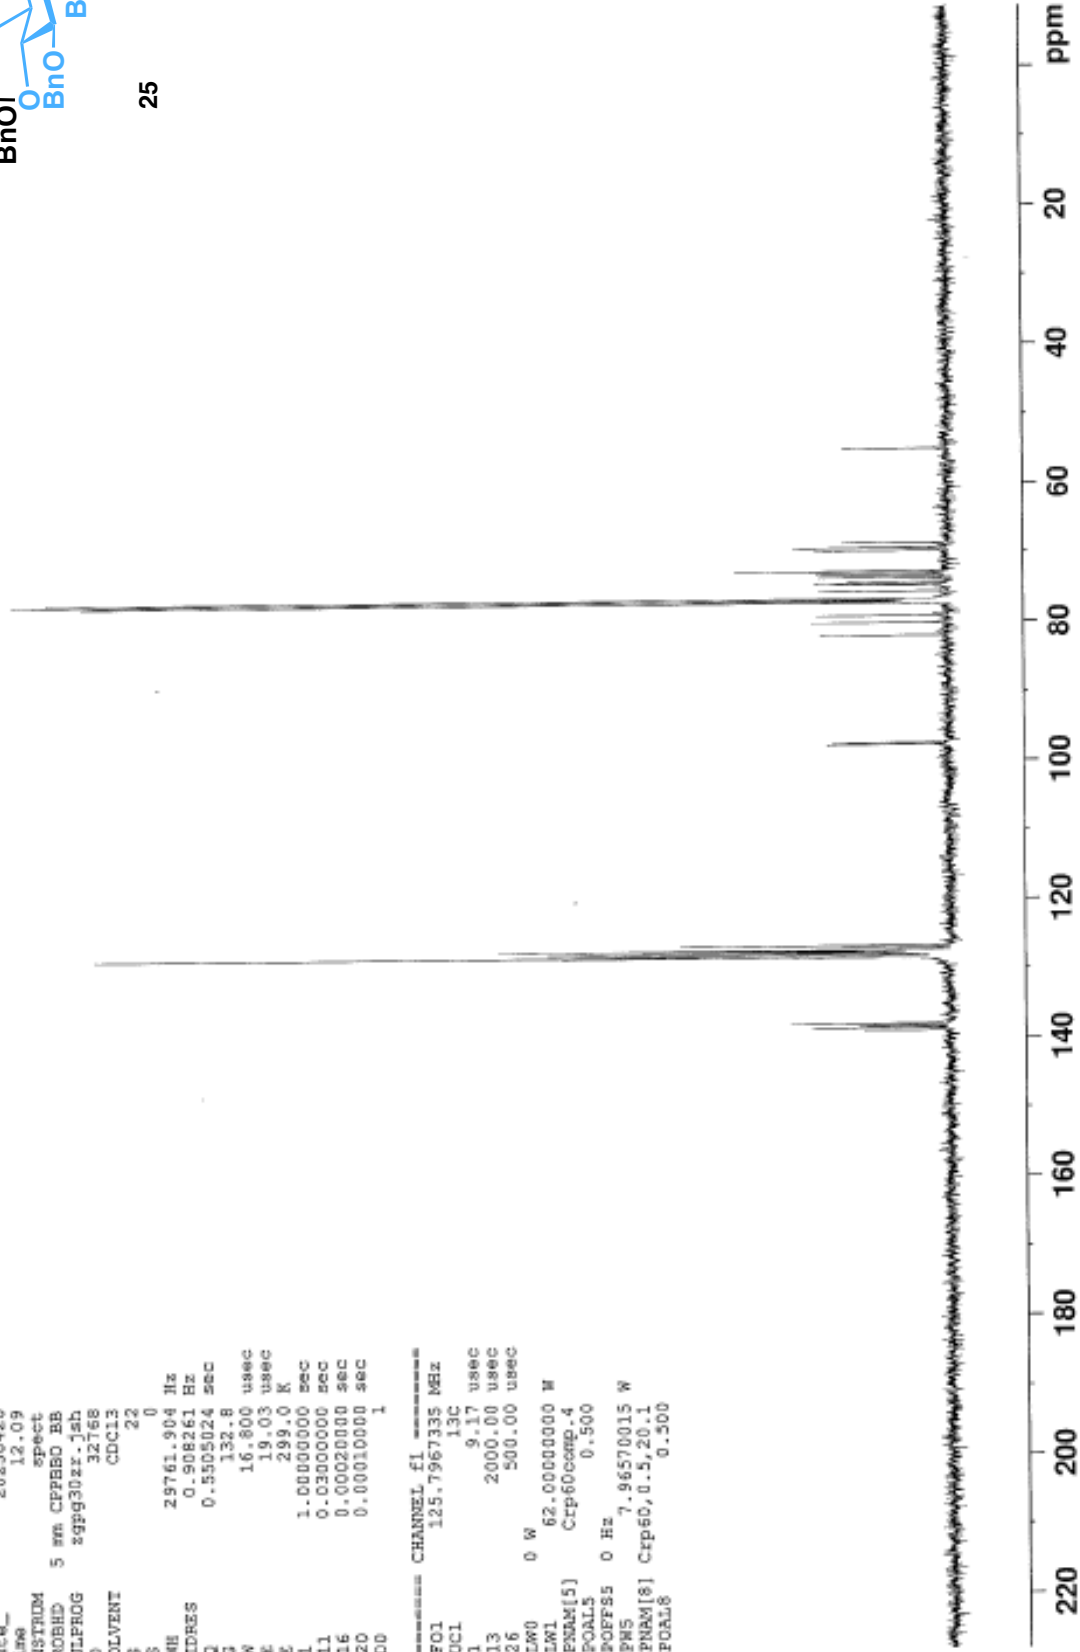

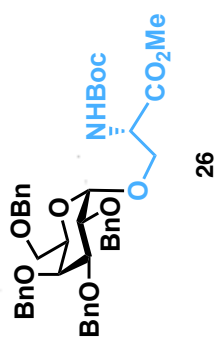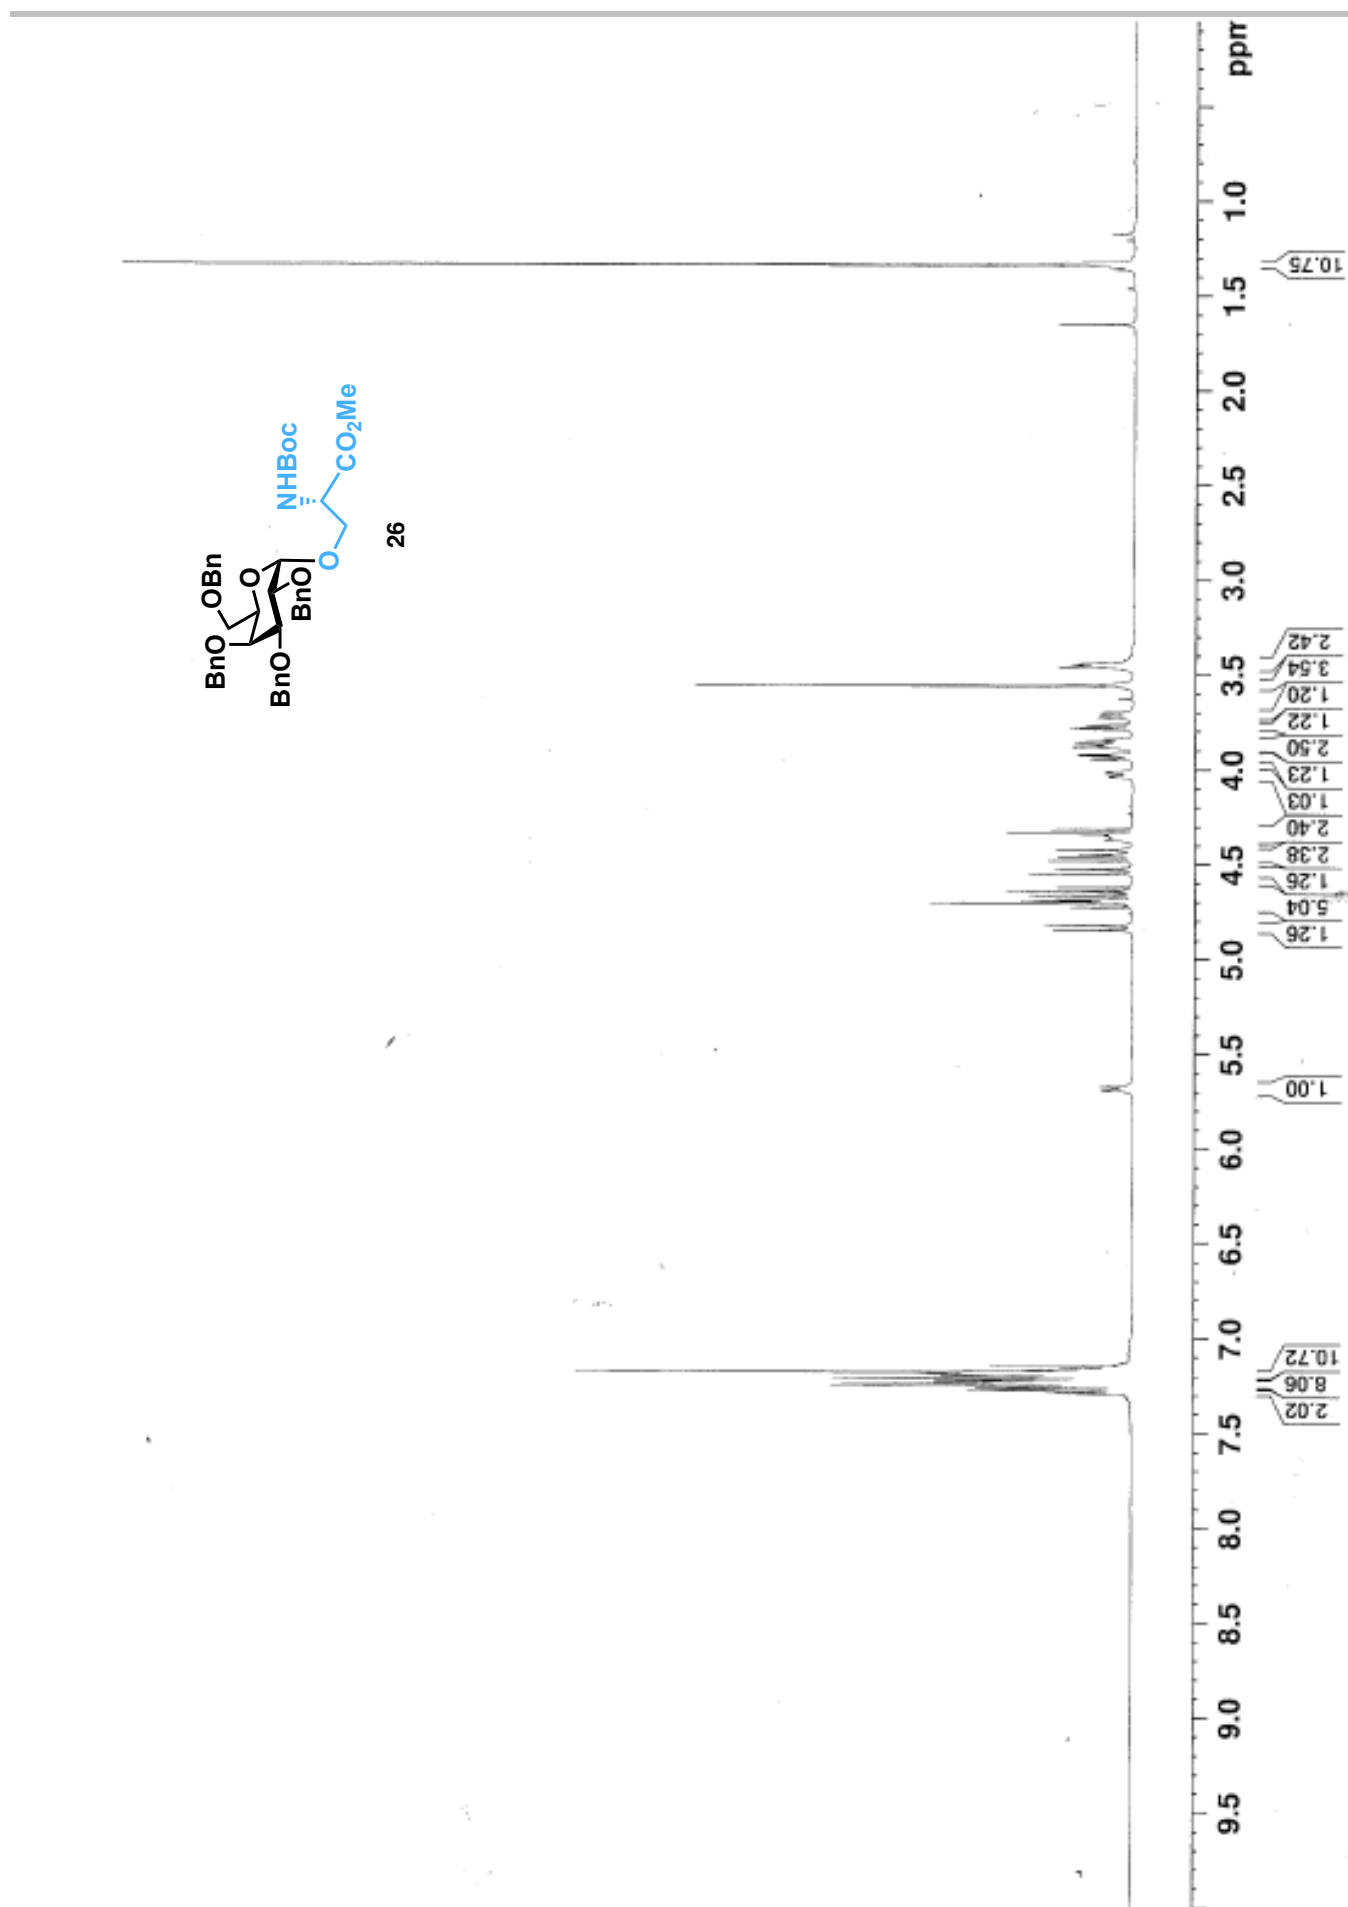

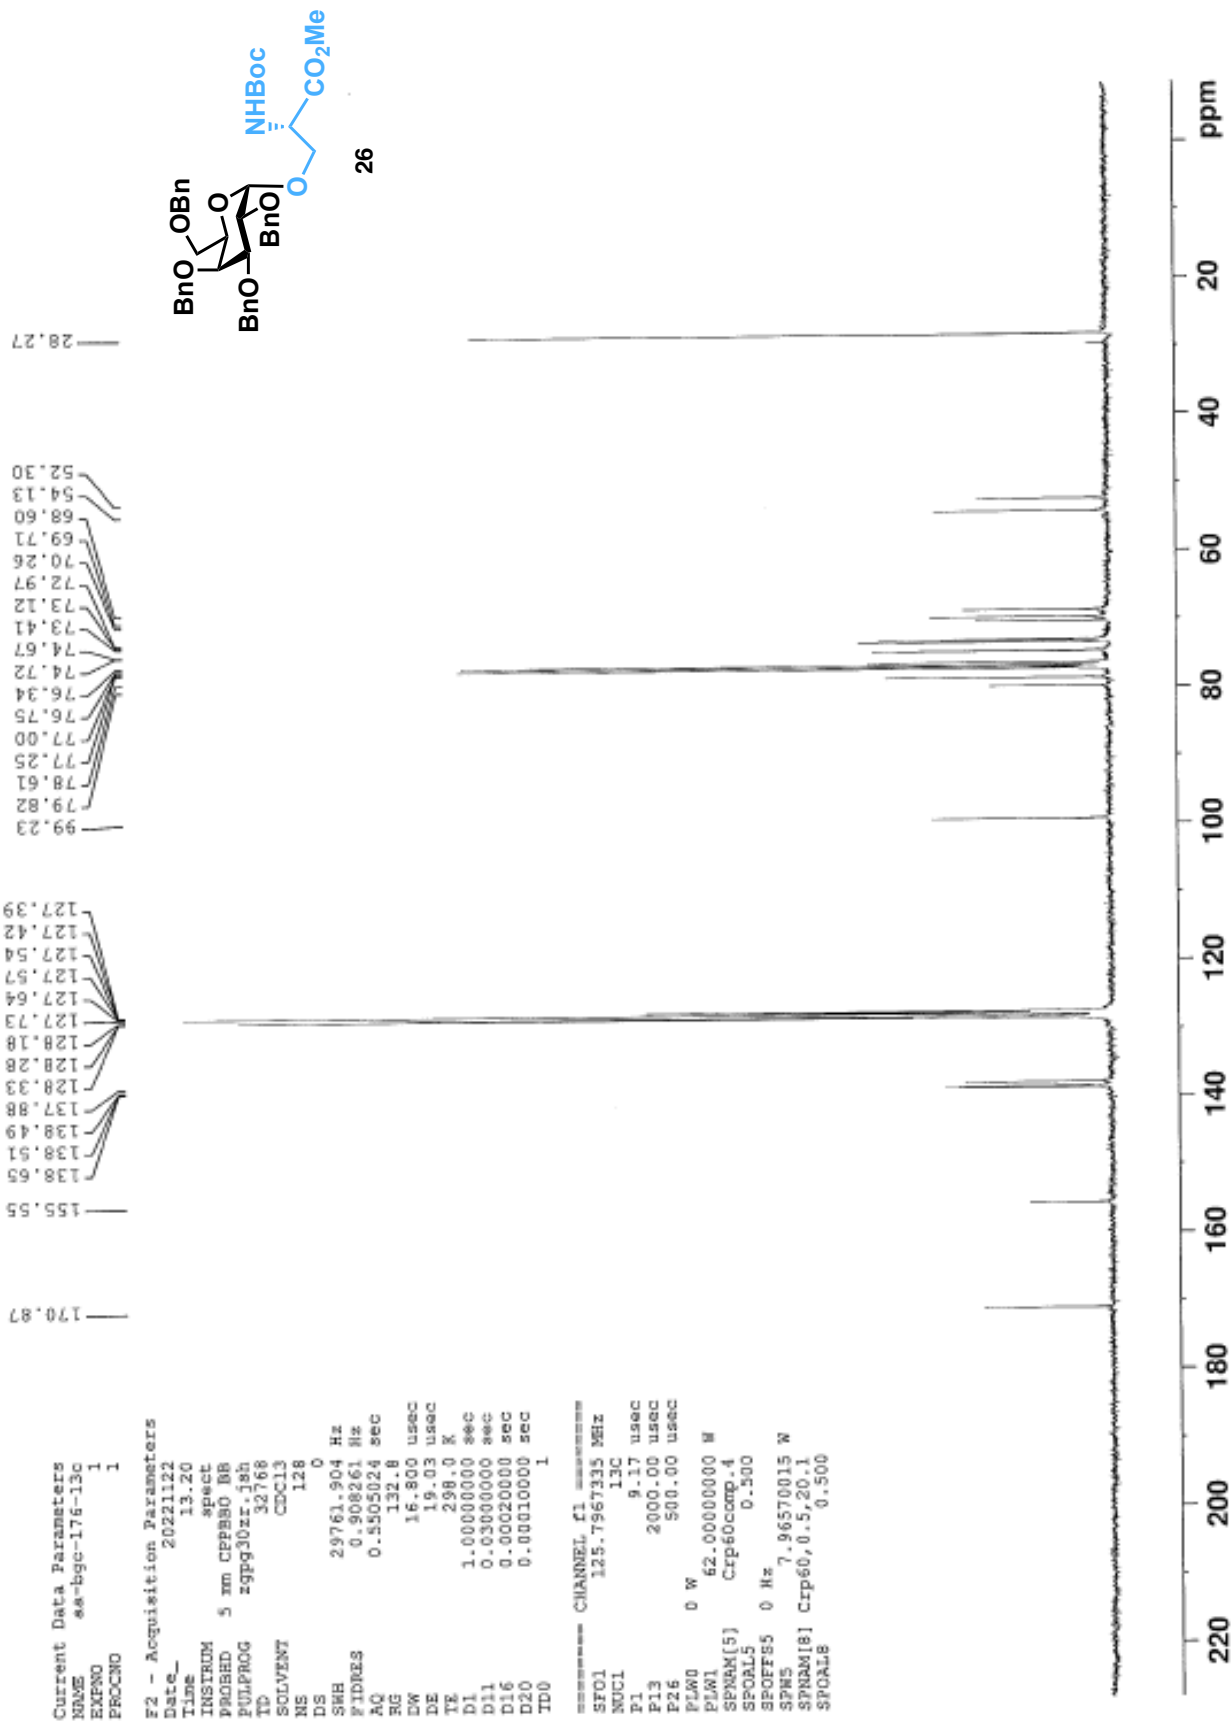

Current Data Parameters  
 NAME sa-bgc-176-13c  
 EXPNO 1  
 PROCNO 1

F2 - Acquisition Parameters  
 Date\_ 20221122  
 Time 13.20  
 INSTRUM spect  
 PROBHD 5 mm CEPPBO BB  
 PULPROG zgpg30zr.jsh  
 TD 32768  
 SOLVENT CDCl3  
 NS 128  
 DS 0  
 SWH 29761.904 Hz  
 FIDRES 0.908261 Hz  
 AQ 0.5505024 sec  
 RG 132.8  
 DW 16.800 usec  
 DE 18.03 usec  
 TE 298.0 K  
 D1 1.00000000 sec  
 D11 0.03000000 sec  
 D16 0.00020000 sec  
 D20 0.00010000 sec  
 ID0 1

CHANNEL f1  
 SF01 125.7967335 MHz  
 NUC1 13C  
 P1 8.17 usec  
 P13 2000.00 usec  
 P26 500.00 usec  
 PLW0 0 W  
 PLW1 62.00000000 W  
 SFOALS5 Crp60comp.4  
 SFOALS 0.500  
 SFOEFS5 0 Hz  
 SFOALS7 7.96570015 W  
 SFOALS8 Crp60.0.5.20.1  
 SFOALS9 0.500



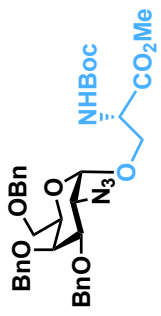

27

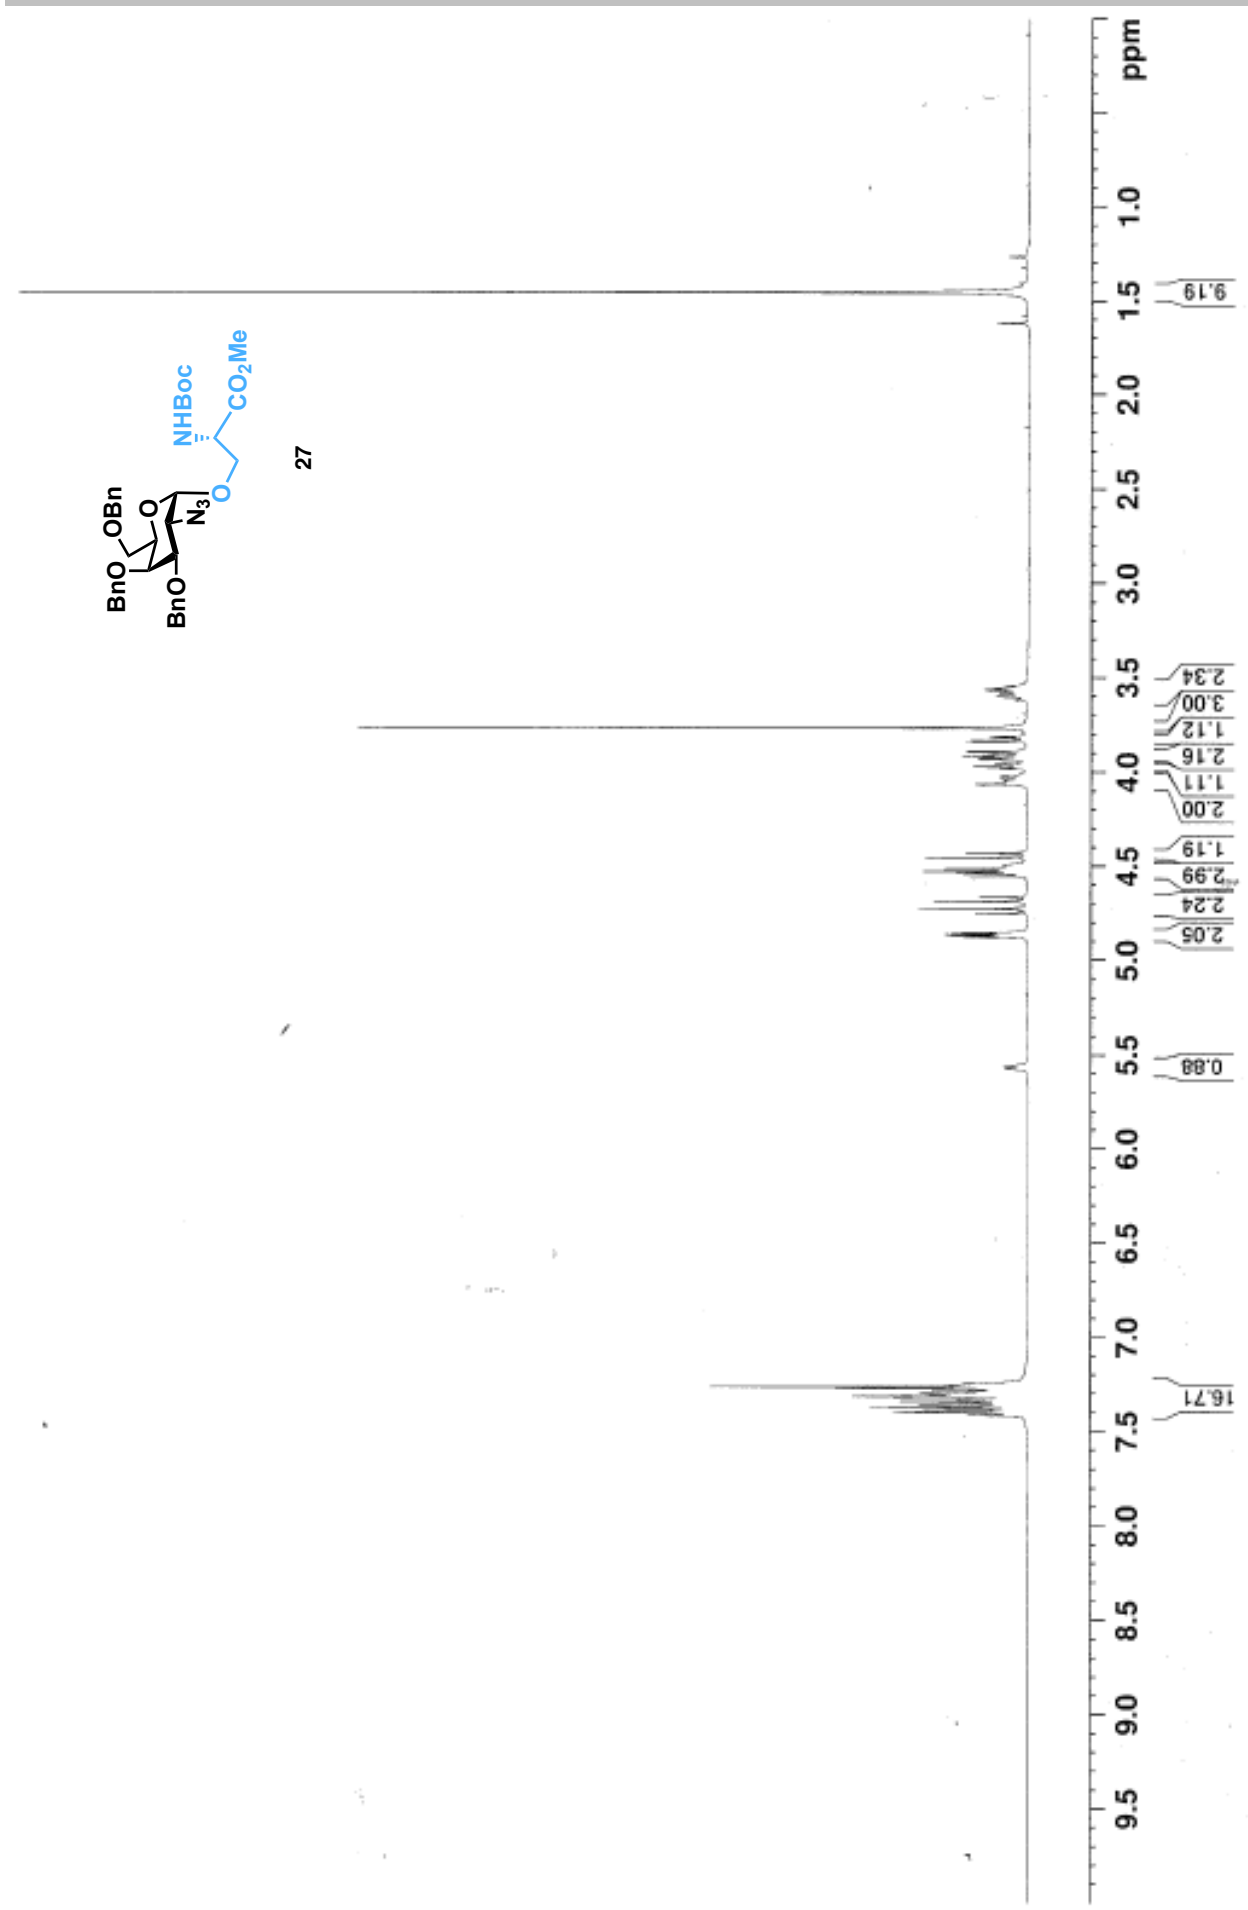

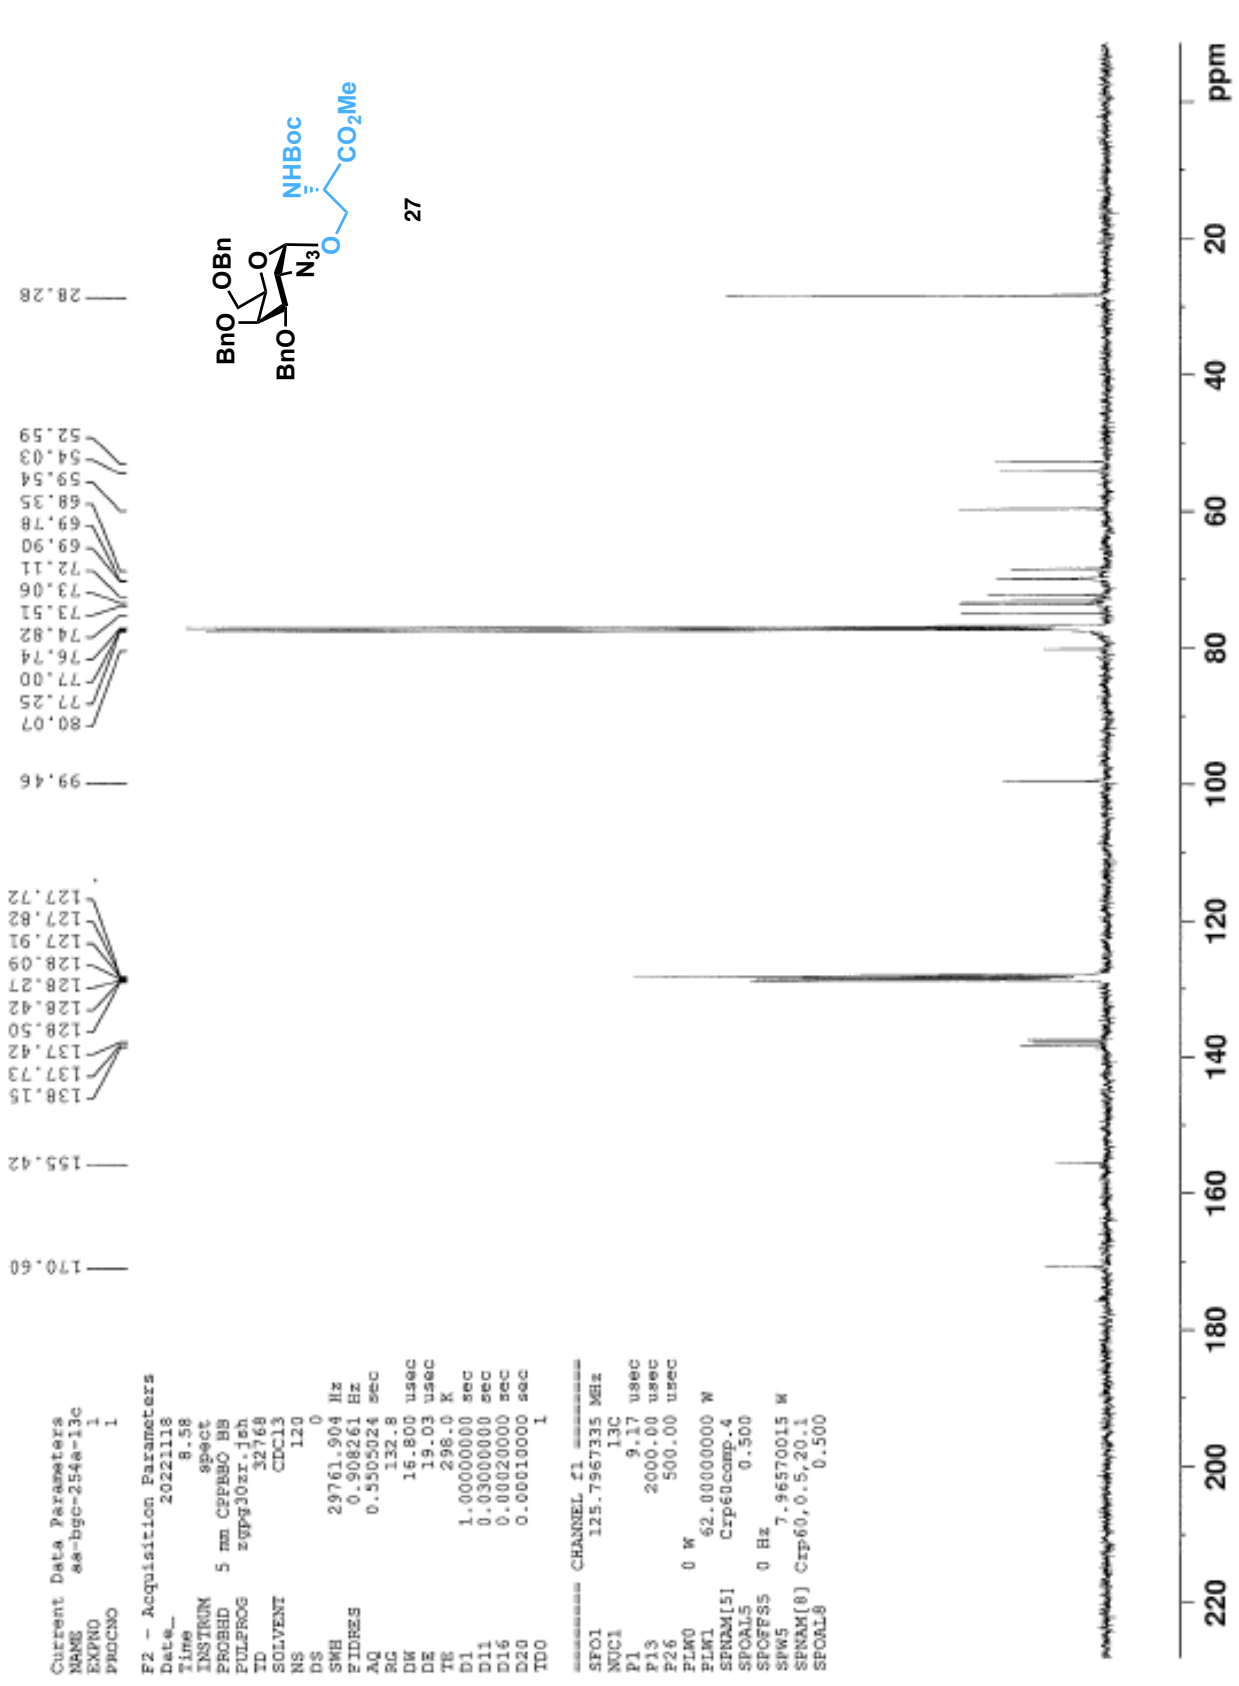

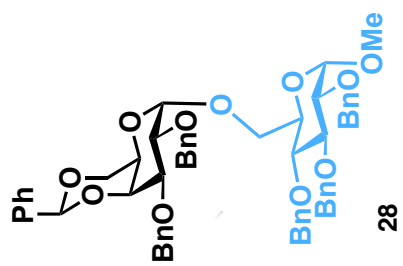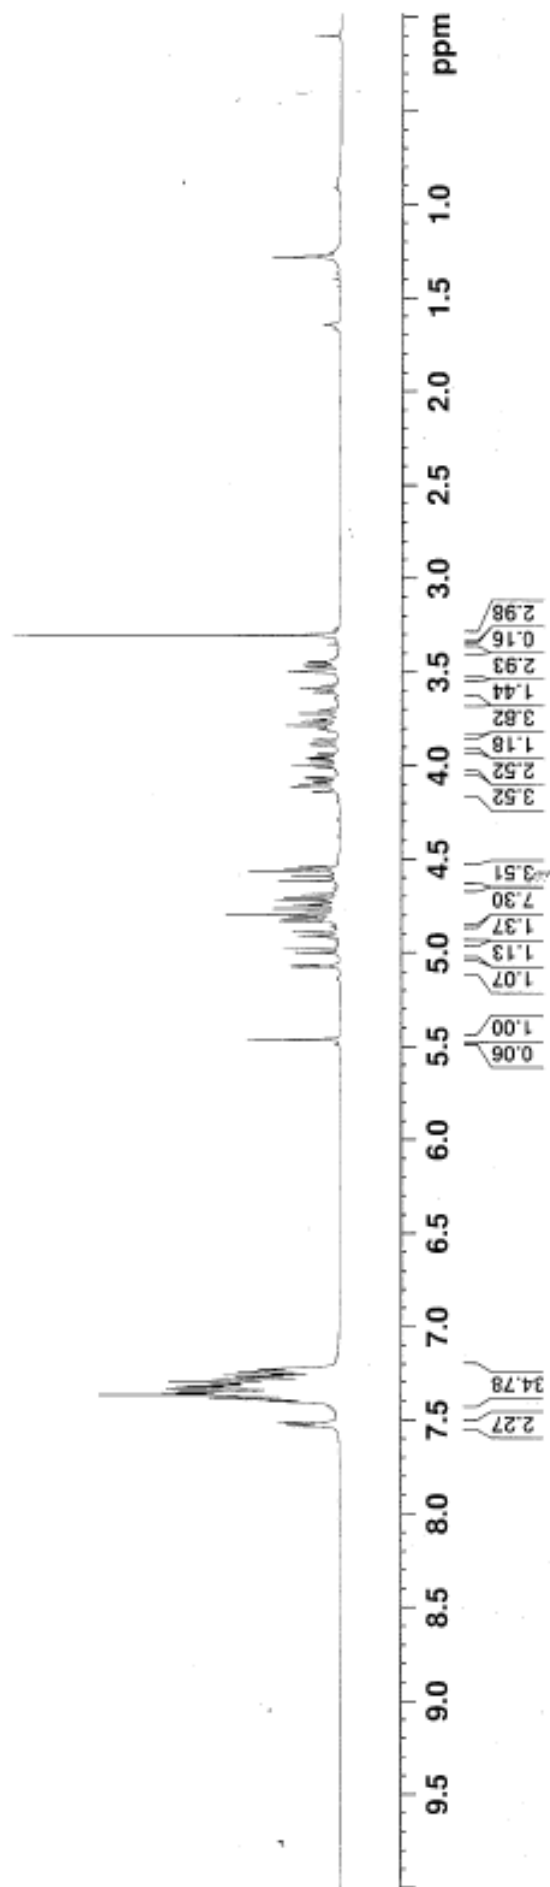

```

Current Data Parameters
NAME      88-bgc-233a-13c
EXPNO    1
PROCNO   1

F2 - Acquisition Parameters
Date_    20221130
Time     9.06
INSTRUM spect
PROBHD   5 mm CPBBD BB
PULPROG zgpg30zr_jsh
TD       32768
SOLVENT  CDCl3
NS       131
DS       0
SWH      29761.904 Hz
FIDRES   0.908251 Hz
AQ       0.3505024 sec
RG        132.8
DW       16.800 usec
DE       19.03 usec
TE       298.0 K
D1       1.00000000 sec
D11      0.03000000 sec
D16      0.00020000 sec
D20      0.00010000 sec
TD0      1

===== CHANNEL f1 =====
SF01    125.7967335 MHz
NUC1     13C
P1       9.17 usec
P13      2000.00 usec
P26      500.00 usec
PLND     0 W
PLM1    62.00000000 W
SFOCAL5 Crp60comp.4
SFOCAL5 0.500
SFOFFS5 0 Hz
SPW5     7.96570015 M
SFOCAL8 Crp60,0.5,20.1
SFOCAL8 0.500

```

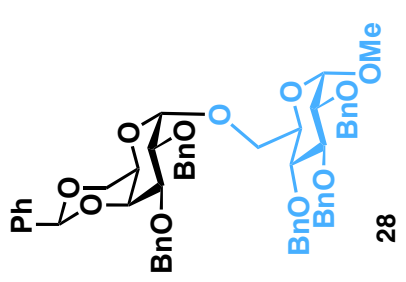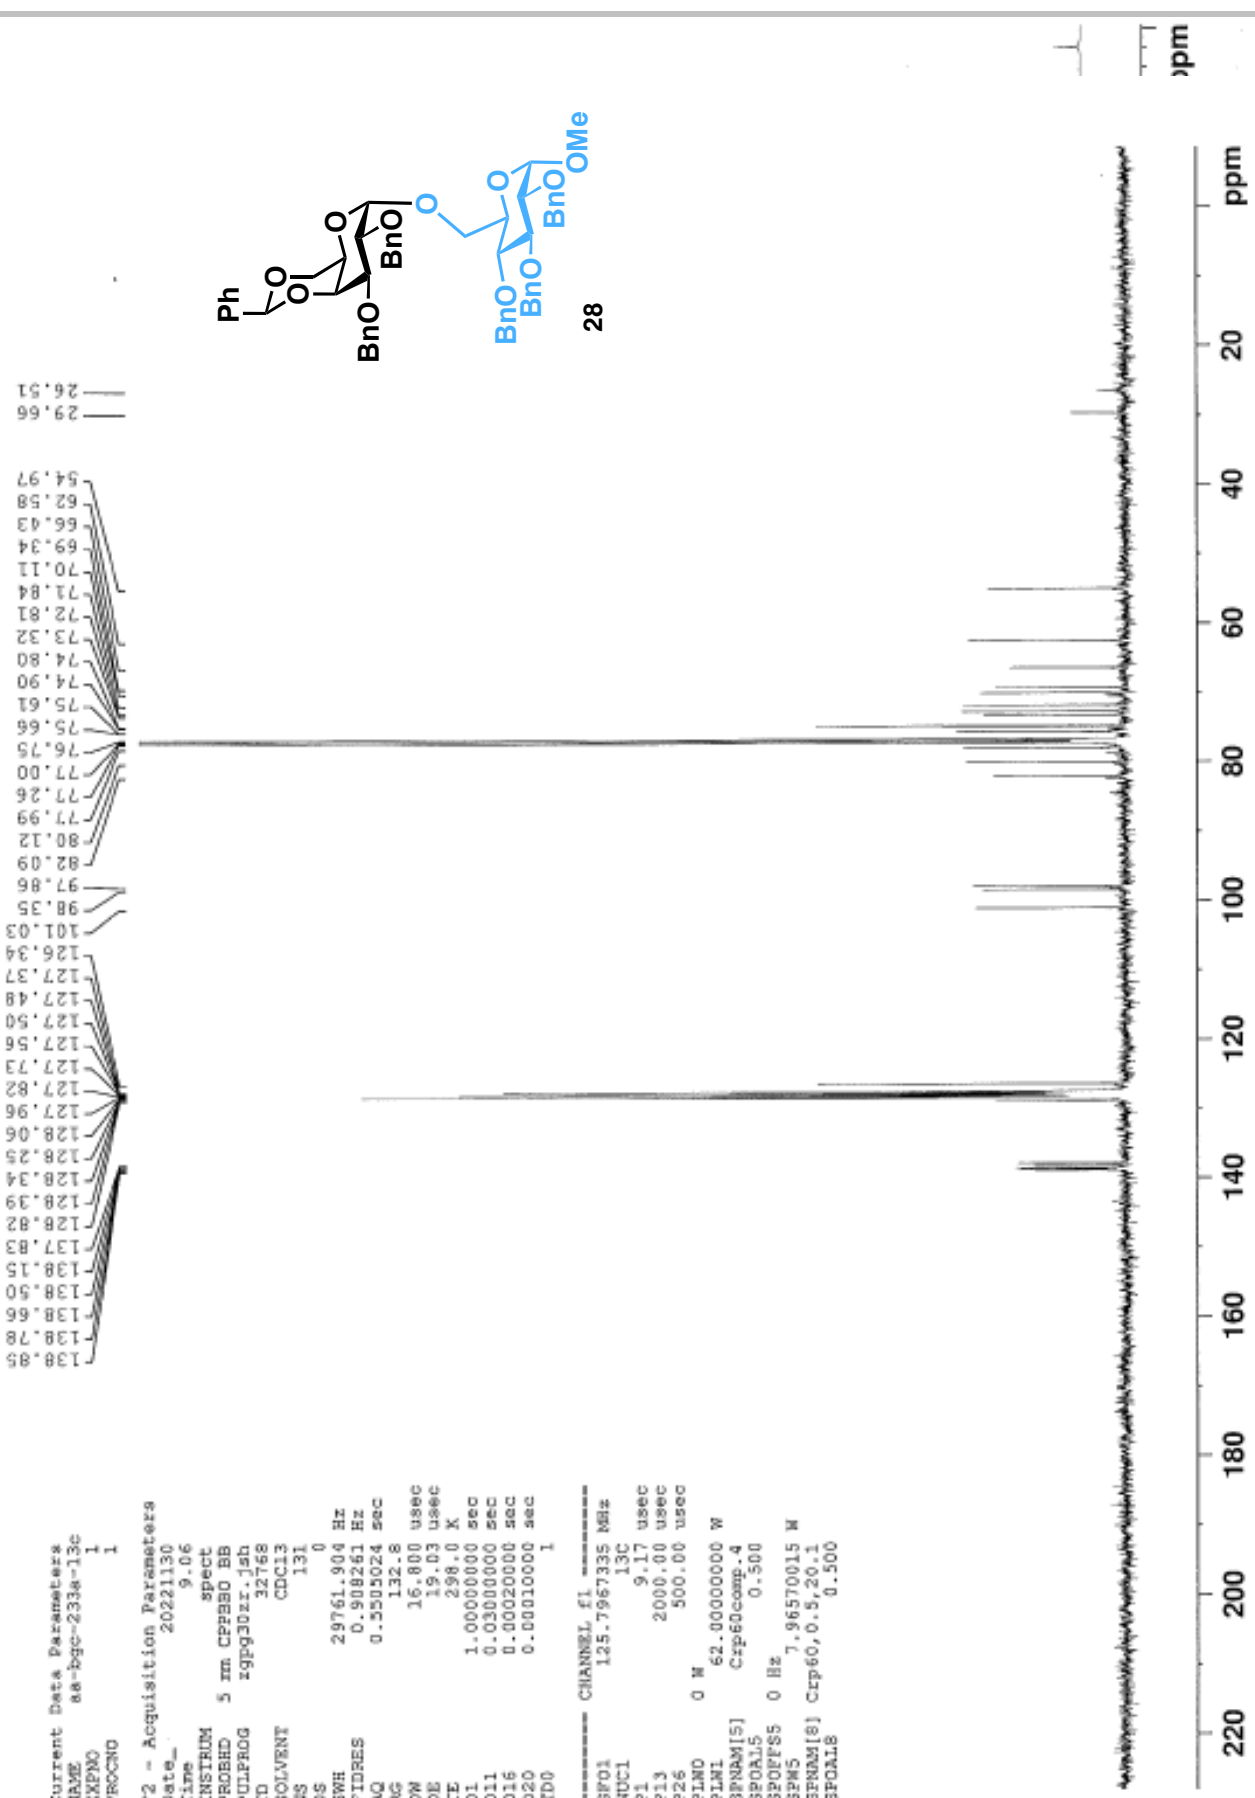

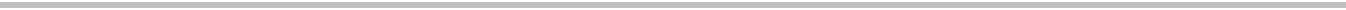

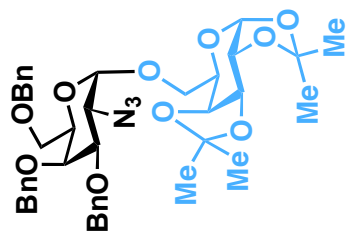

29

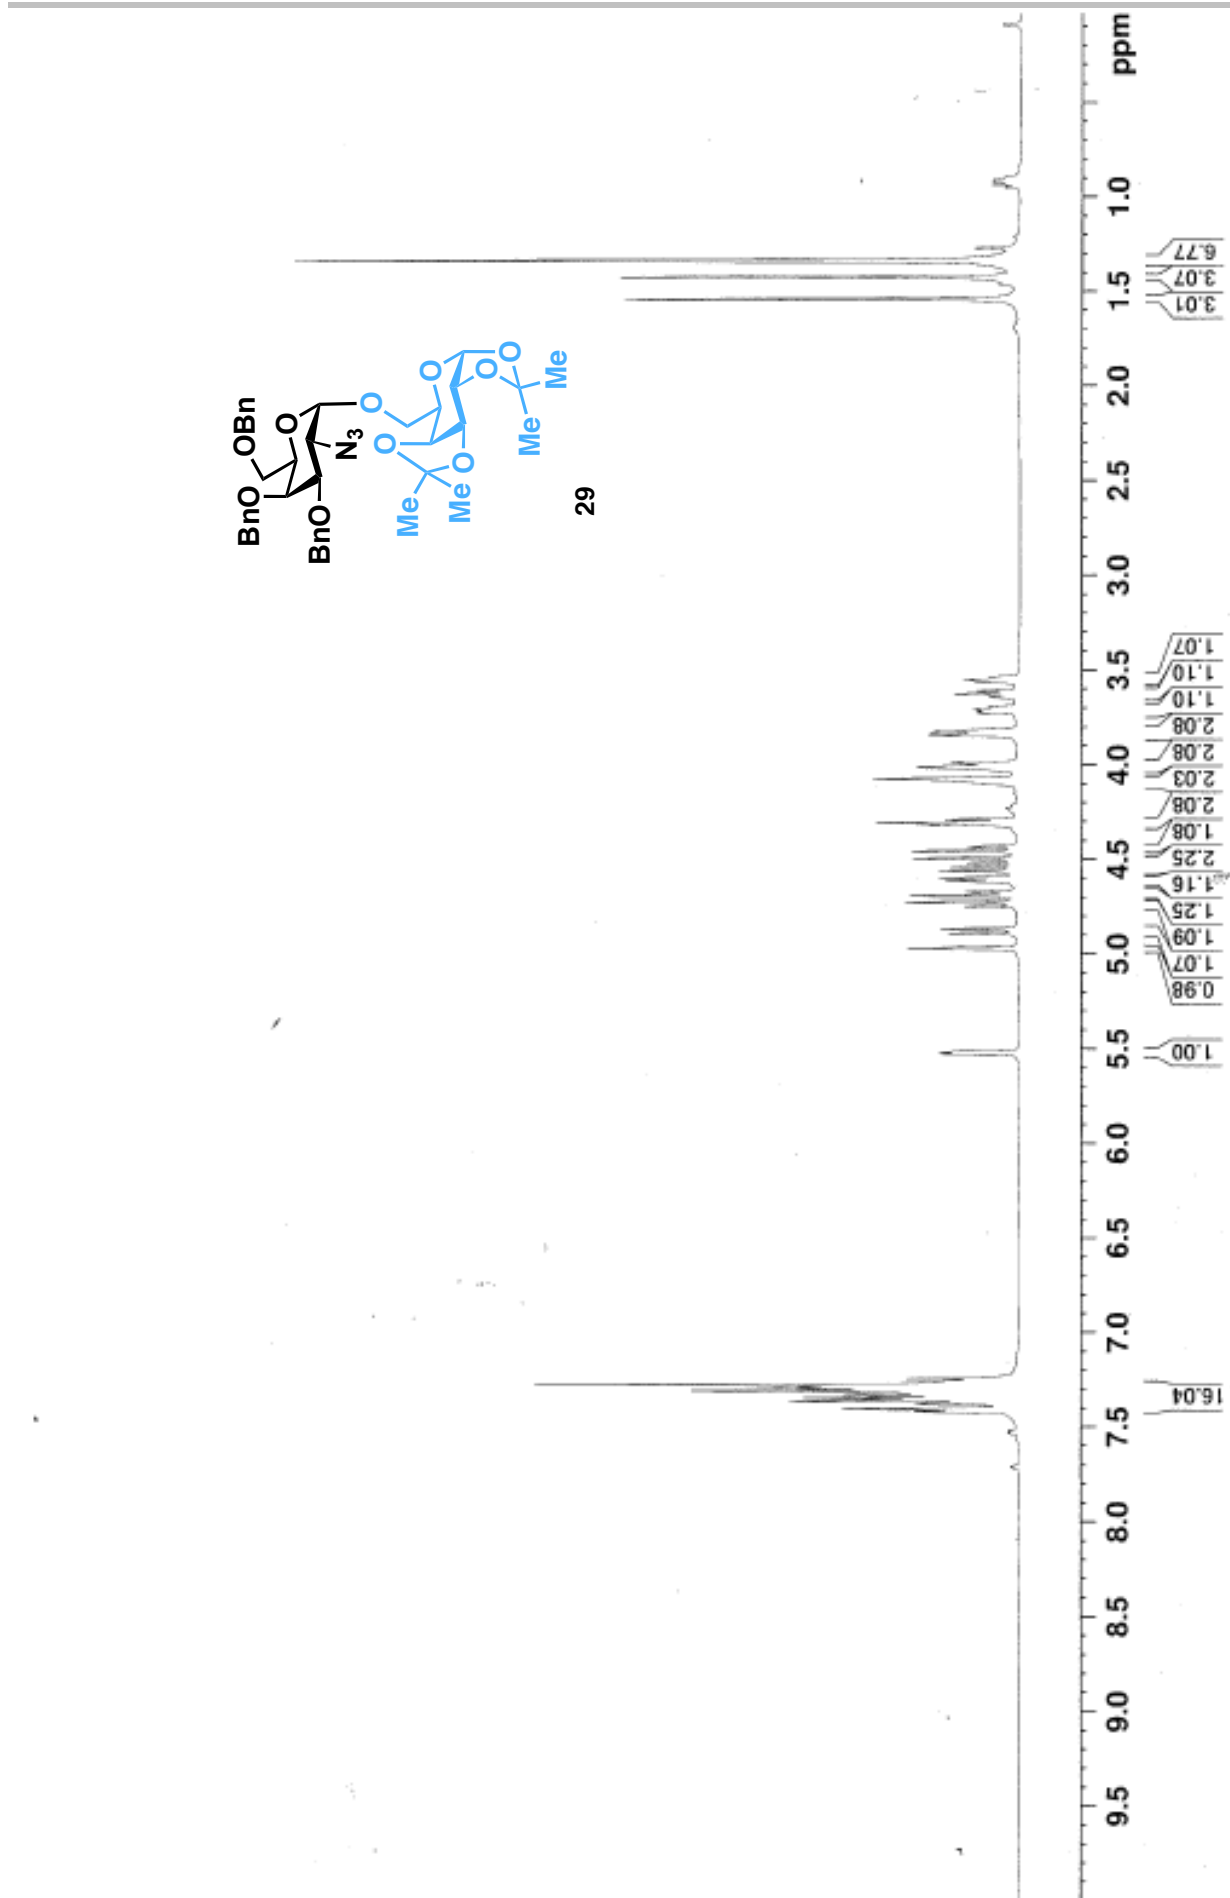

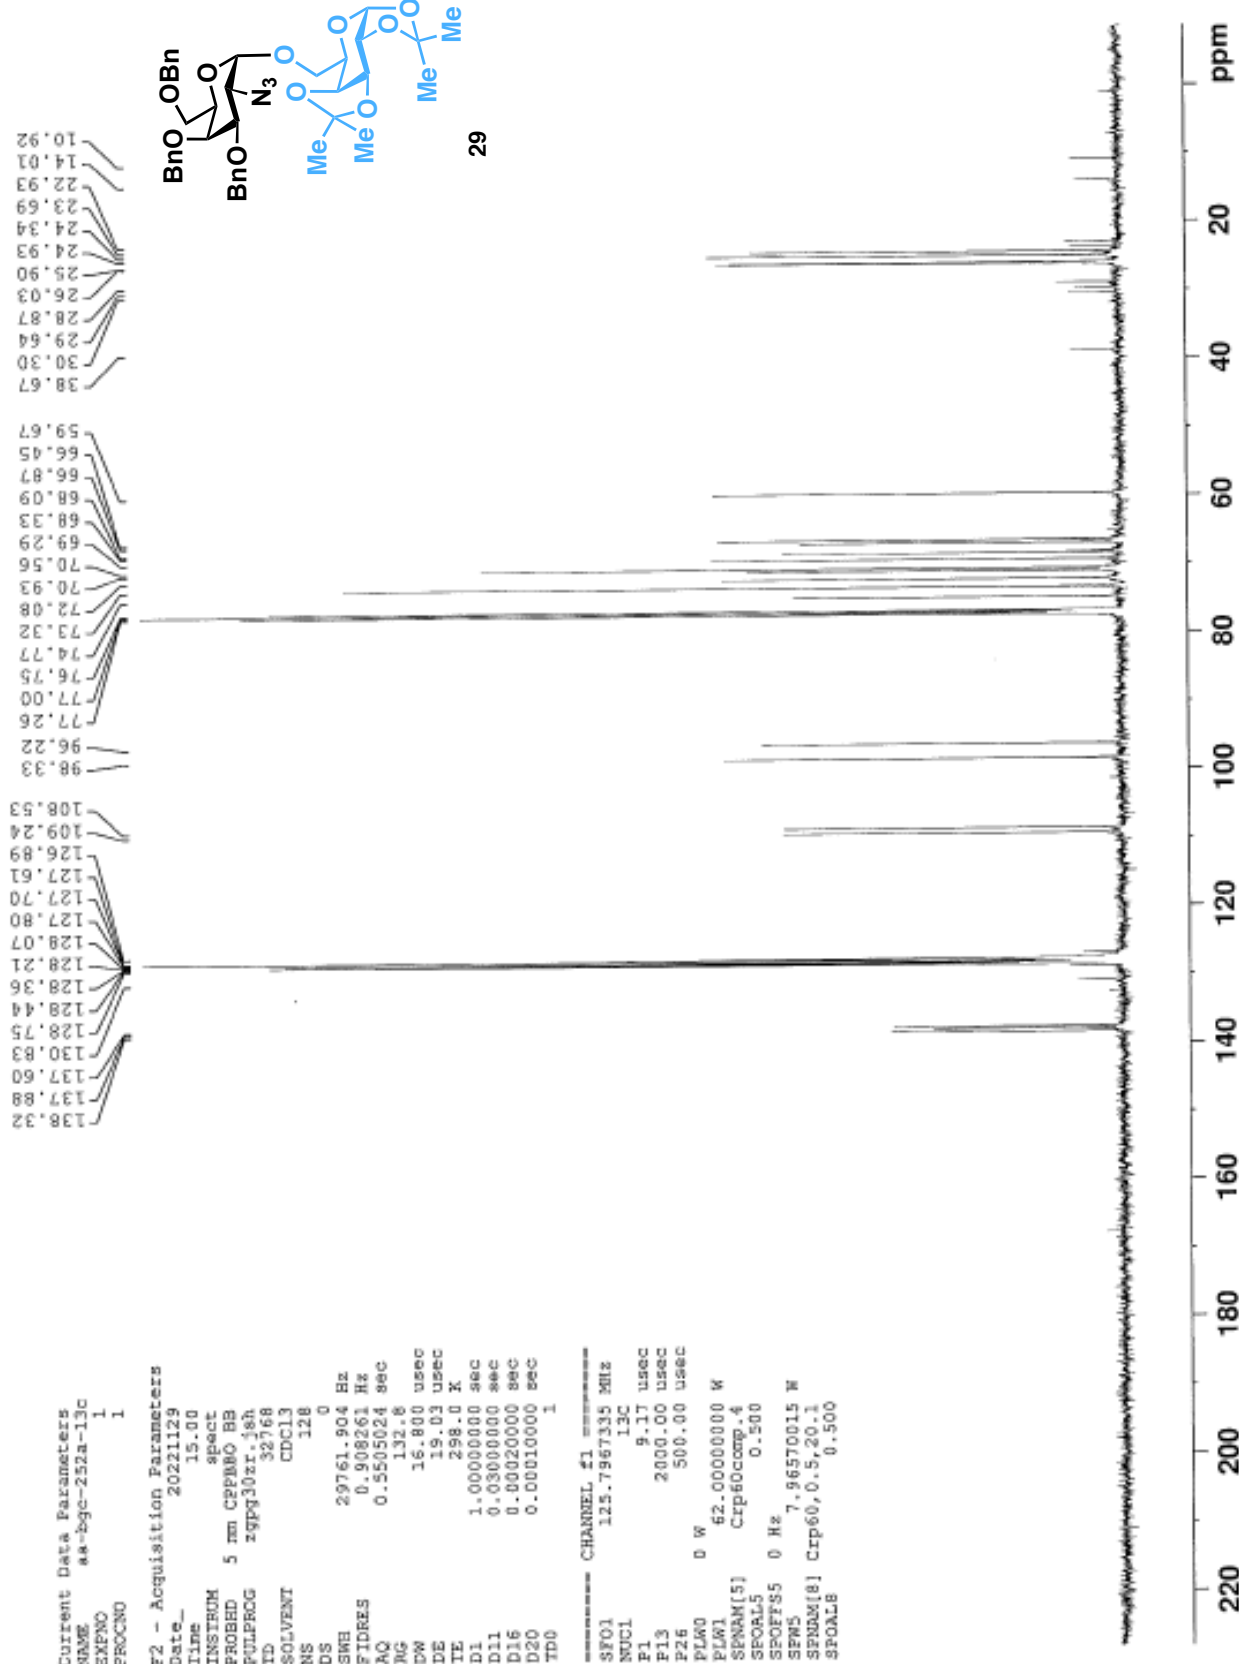





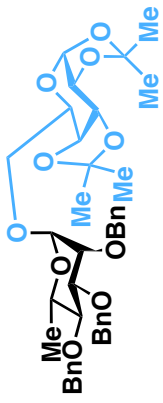

30

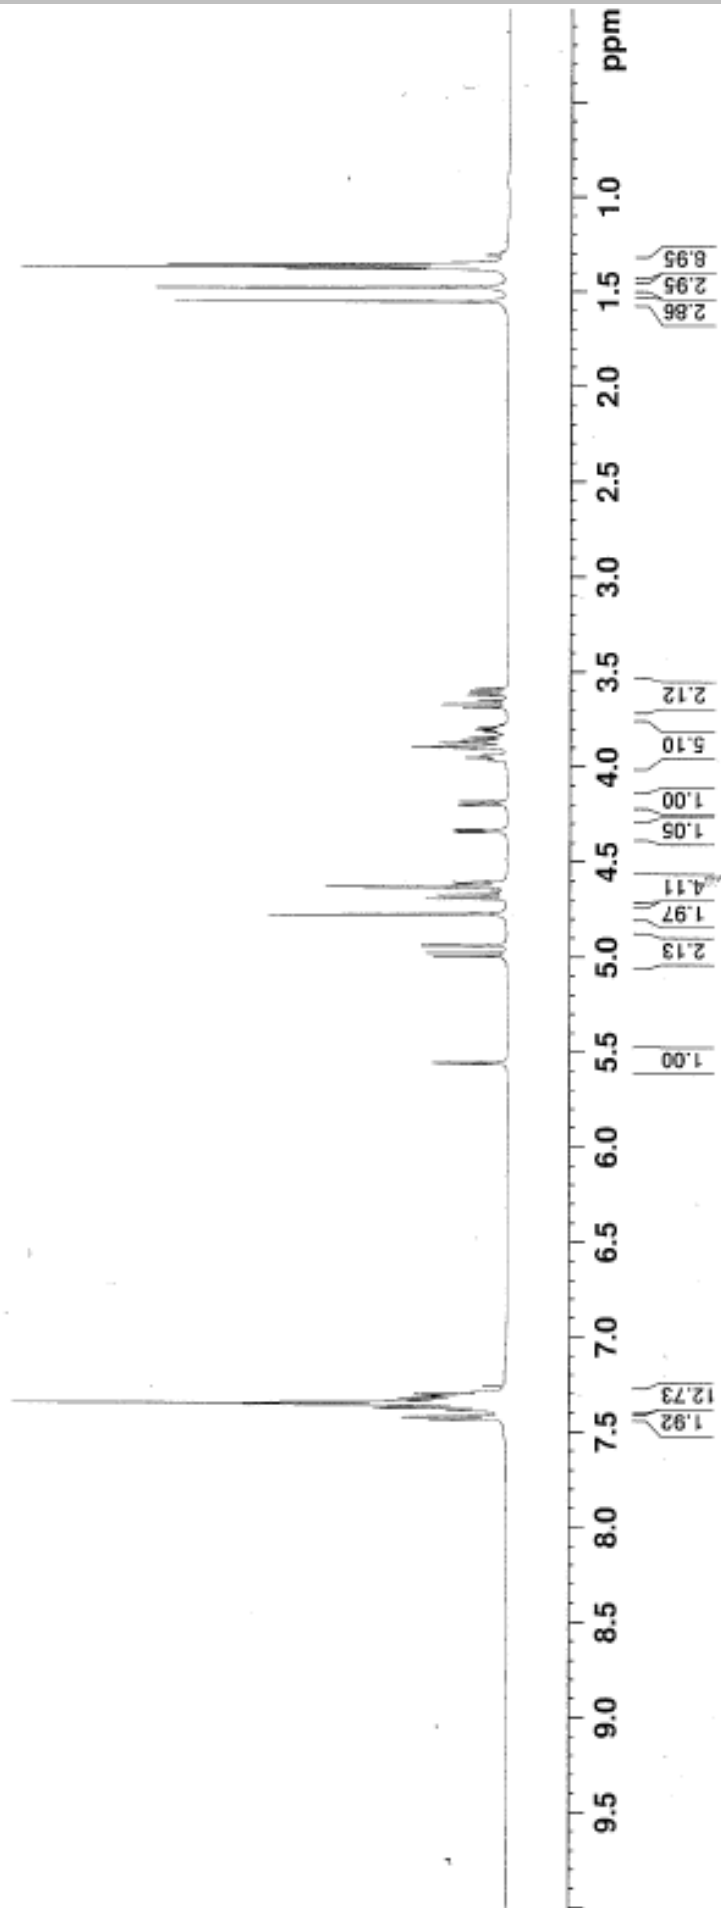

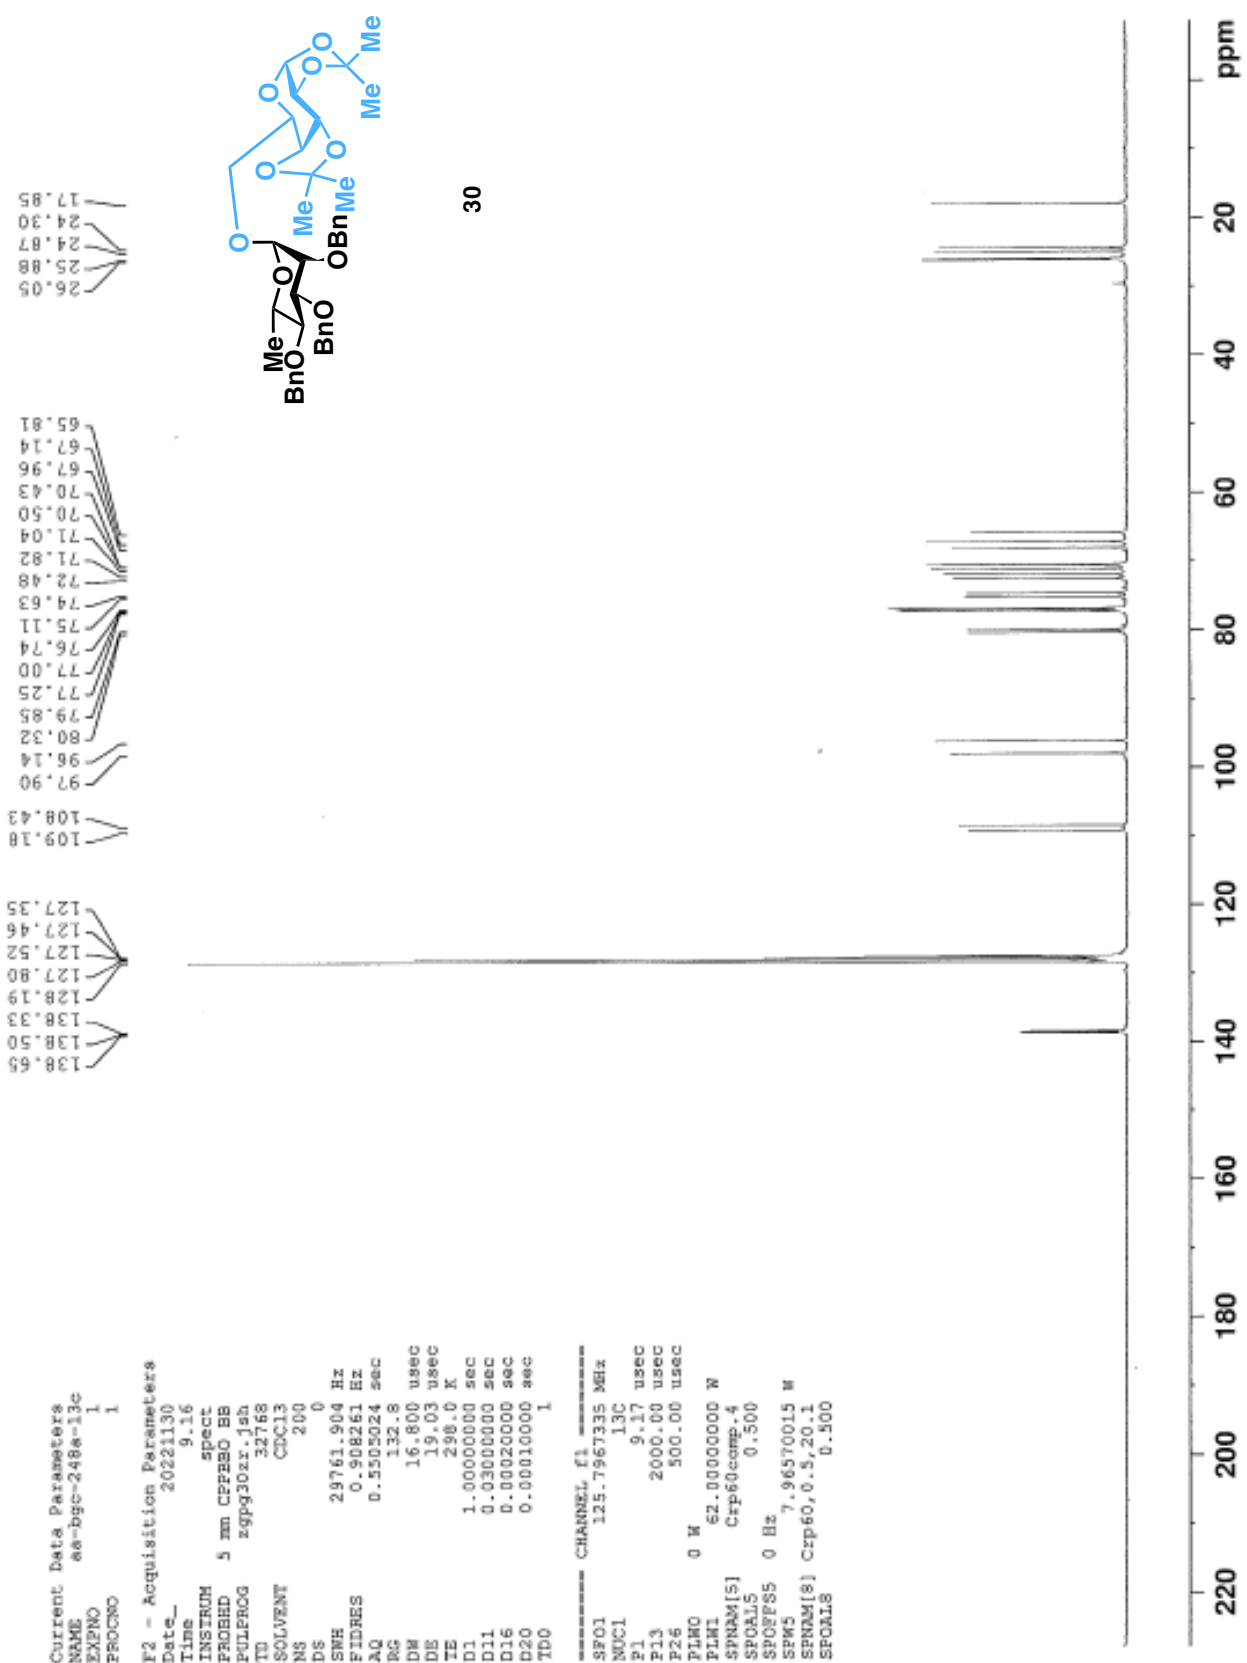

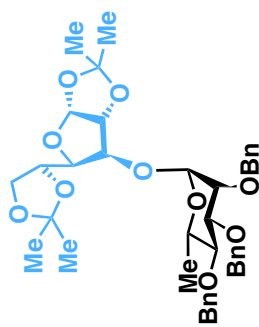

31

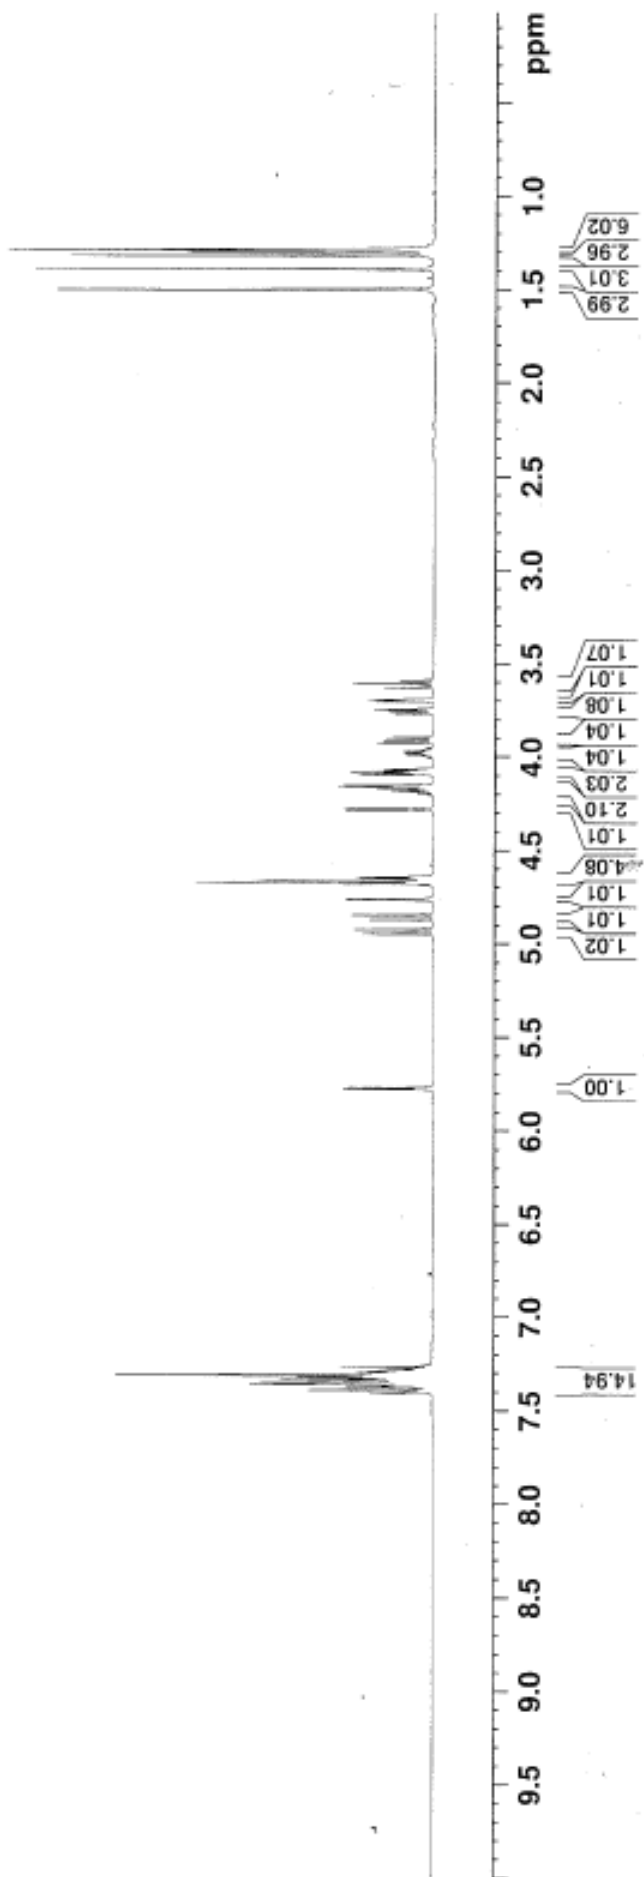

Current Data Parameters  
 NAME aa-bgc-249a-13c  
 EXPNO 1  
 PROCNO 1

F2 - Acquisition Parameters  
 Date\_ 20221130  
 Time\_ 8.41  
 INSTRUM spect  
 FROSHD 5 mm CFPBBO BB  
 PULPROG zgpg30uzr.jsh  
 ID 32768  
 SOLVENT CDC13  
 NS 94  
 DS 0  
 SWH 29761.904 Hz  
 FIDRES 0.908261 Hz  
 AQ 0.5505024 sec  
 RG 132.8  
 DM 16.800 usec  
 DE 19.03 usec  
 TE 298.0 K  
 D1 1.00000000 sec  
 D11 0.03000000 sec  
 D16 0.00020000 sec  
 D20 0.00010000 sec  
 TD0 1

CHANNEL f1  
 SF01 125.7967335 MHz  
 NUC1 13C  
 P1 9.17 usec  
 P13 2000.00 usec  
 P26 500.00 usec  
 PLW0 0 W  
 PLW1 62.00000000 W  
 SFOALS Cfp60csmg-4  
 SFOALS 0.500  
 SFOYFS 0 Hz  
 SFW5 7.96570015 W  
 SPMAM[0] Cfp60,0.5,20.1  
 SFOALS 0.500

138.84  
138.97  
138.18  
128.37  
128.32  
128.18  
128.16  
127.78  
127.71  
127.58  
127.49  
127.35  
111.87  
109.16  
105.14  
95.86  
81.68  
80.90  
80.22  
79.78  
77.25  
77.00  
76.74  
76.61  
75.20  
74.82  
73.30  
72.48  
71.89  
68.50  
67.76

26.70  
26.15  
25.19  
17.62

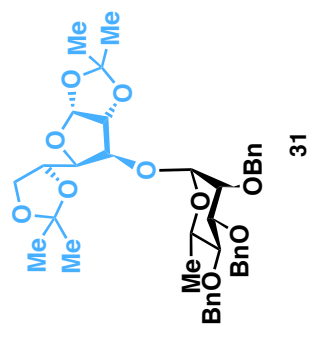

31

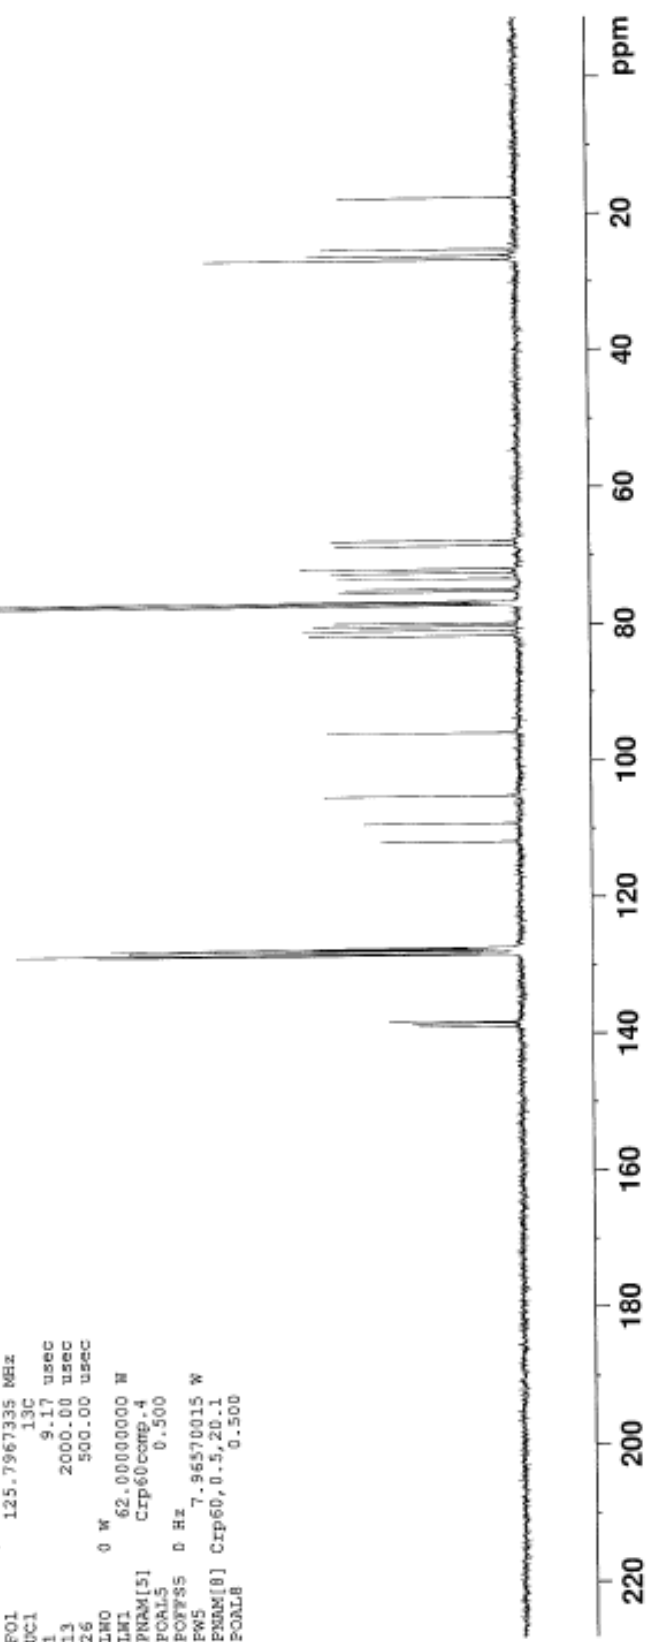

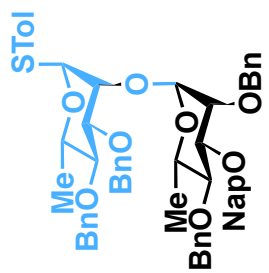

32

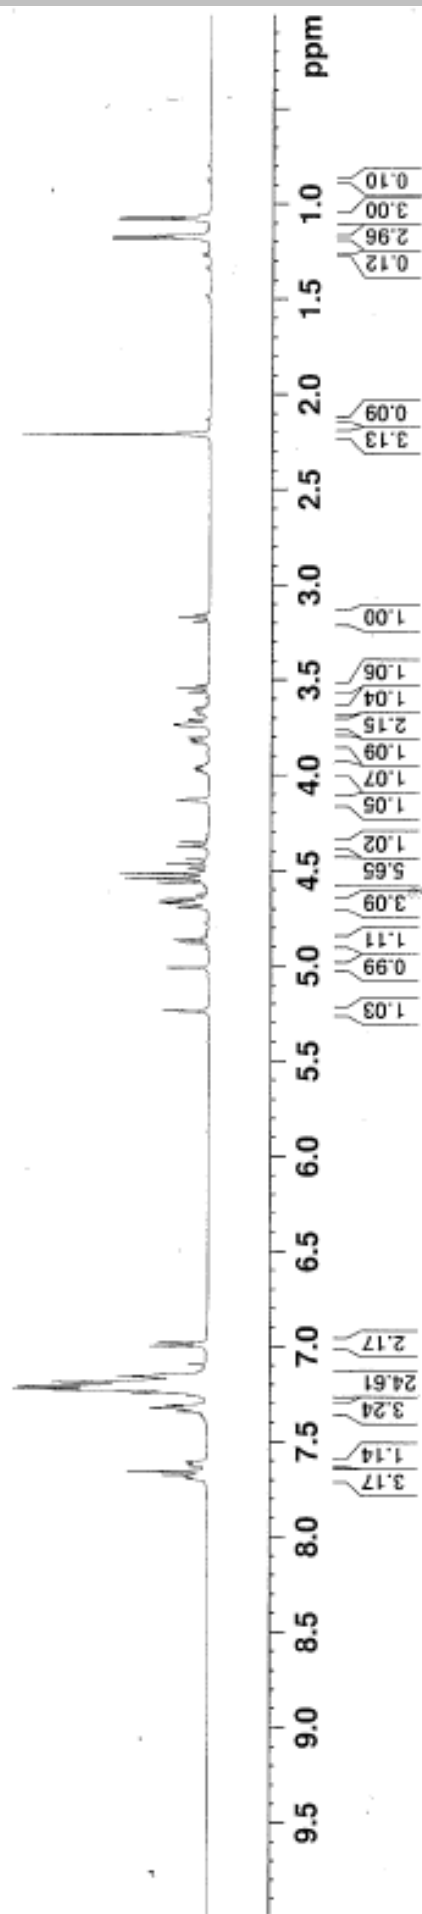

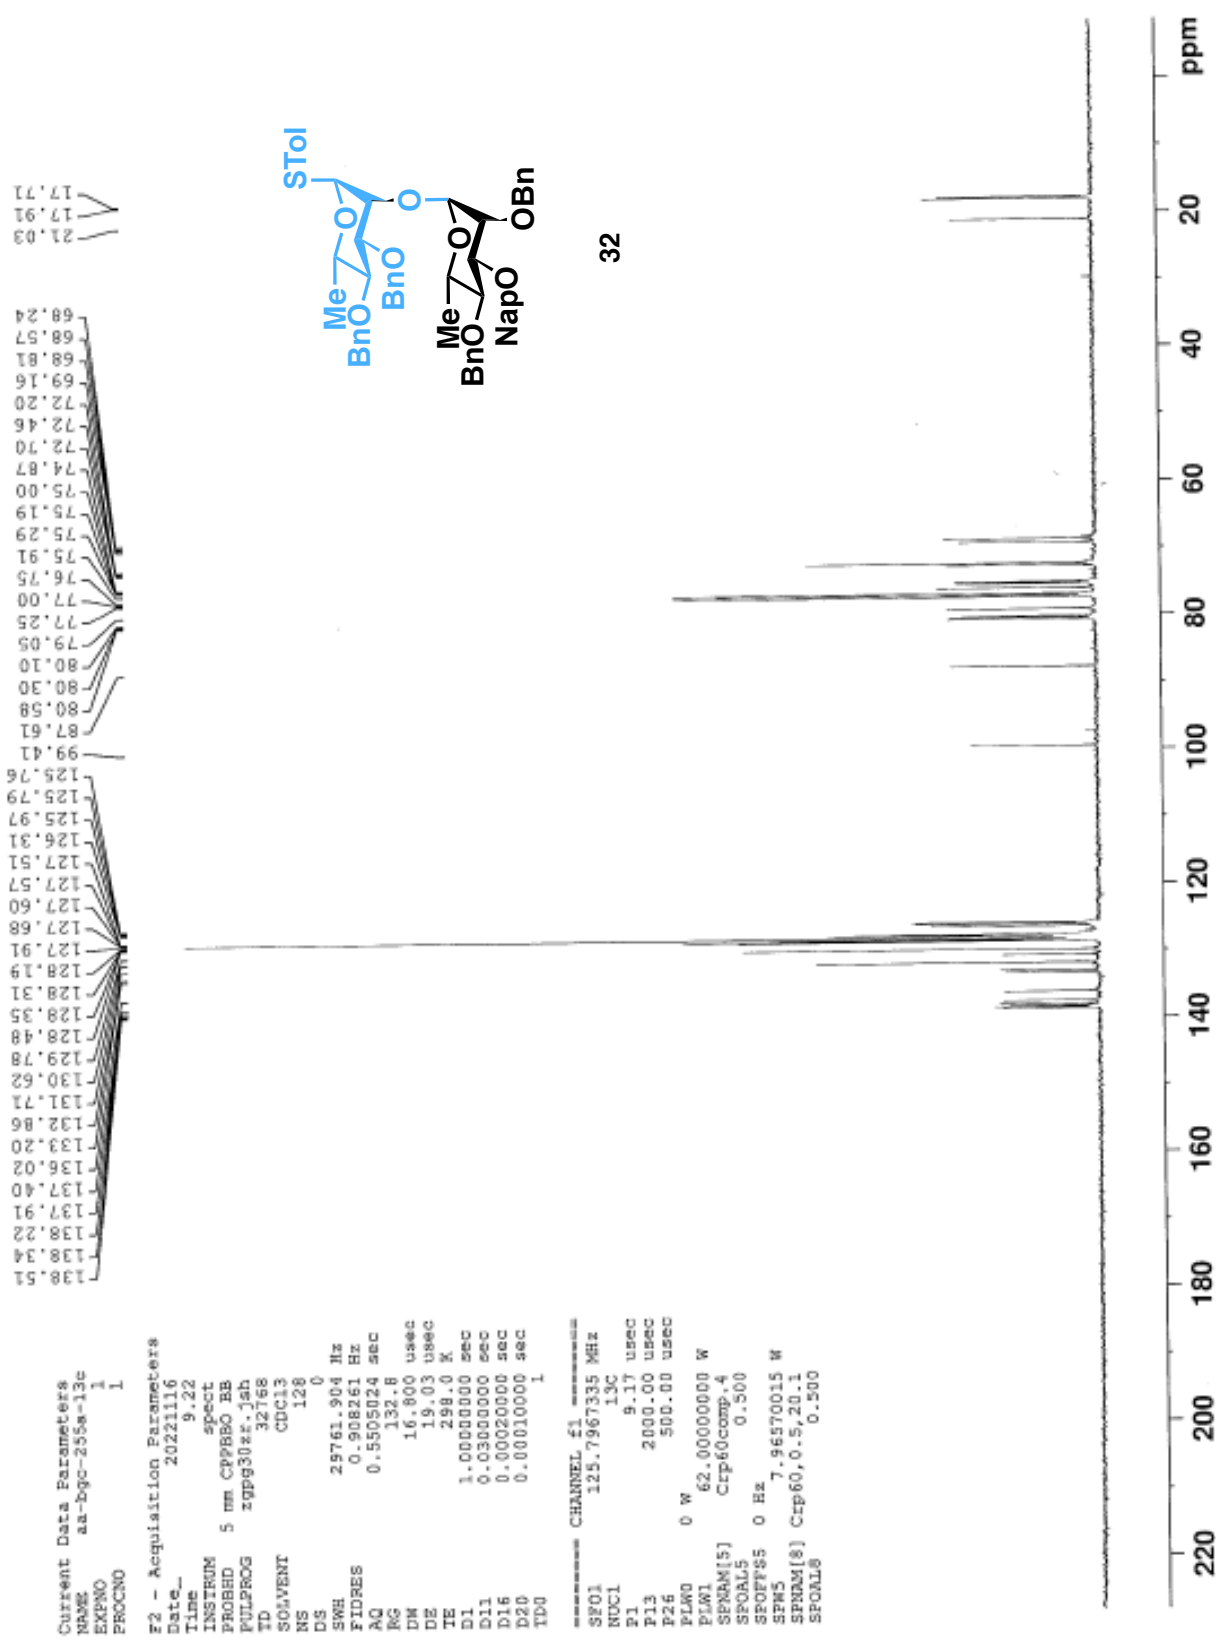

Current Data Parameters  
 Name aa-dgc-2558-13c  
 EXPNO 1  
 PROCNO 1

F2 - Acquisition Parameters  
 Date\_ 20221116  
 Time 9:22  
 INSTRUM spect  
 PROBED 5 mm CFPBBO BB  
 PULPROG zgpg30sr.jsh  
 TD 32768  
 SOLVENT CDC13  
 NS 128  
 DS 0  
 SWH 25761.904 Hz  
 FIDRES 0.908261 Hz  
 AQ 0.5505024 sec  
 RG 132.8  
 DM 16.800 usec  
 DE 19.03 usec  
 TE 299.0 K  
 D1 1.00000000 sec  
 D11 0.03000000 sec  
 D16 0.00020000 sec  
 D20 0.00010000 sec  
 TD0 1

CHANNEL f1  
 SFO1 125.7967335 MHz  
 NUC1 13C  
 P1 9.17 usec  
 PL3 2000.00 usec  
 P25 500.00 usec  
 PLW0 0 W  
 PLW1 62.00000000 W  
 SFOAL5 Cfp60comp.4  
 SFOALS 0.500  
 SFOFV5 0 Hz  
 SFMS 7.96570015 W  
 SFNAM[8] Cfp60.0.5.20.1  
 SFOALS 0.500

32

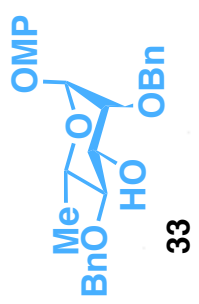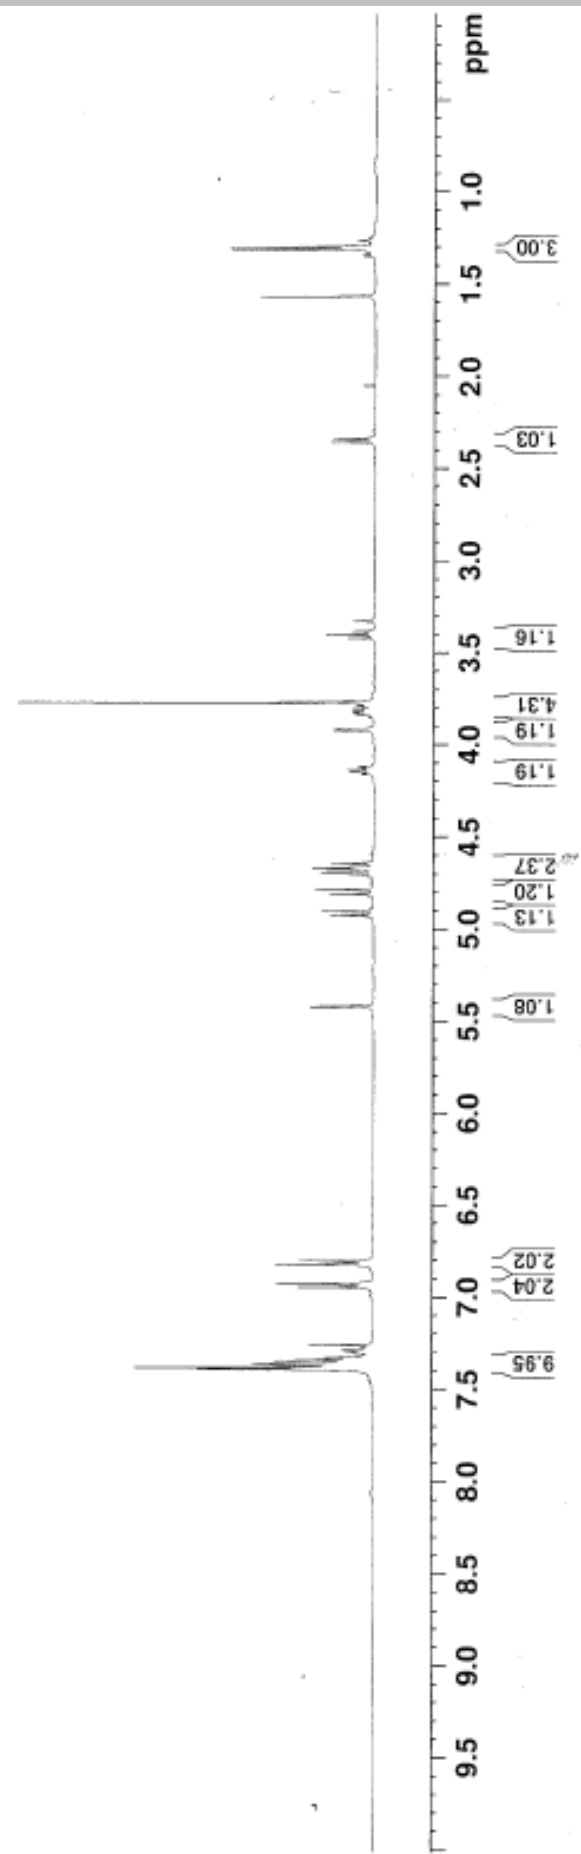

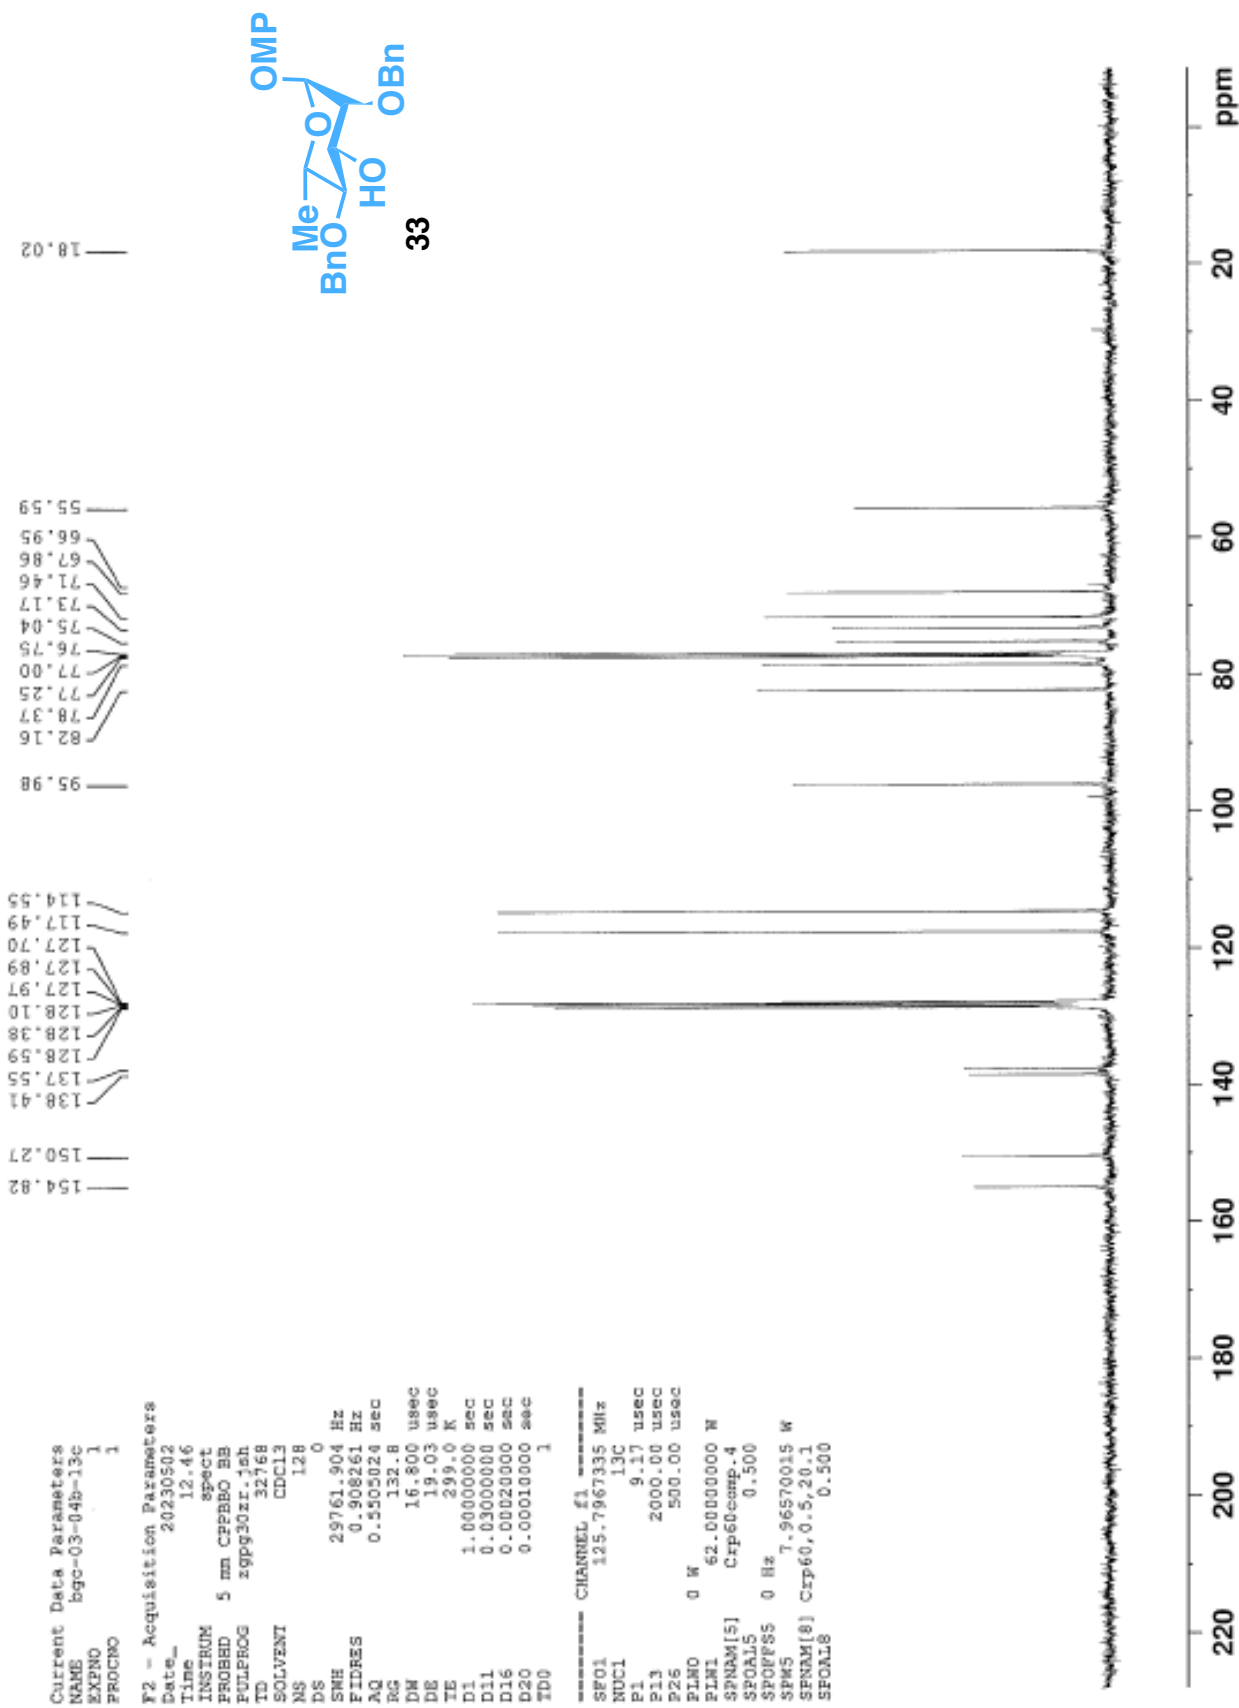



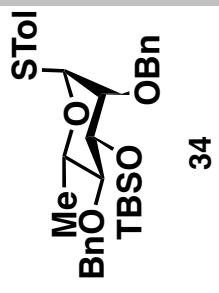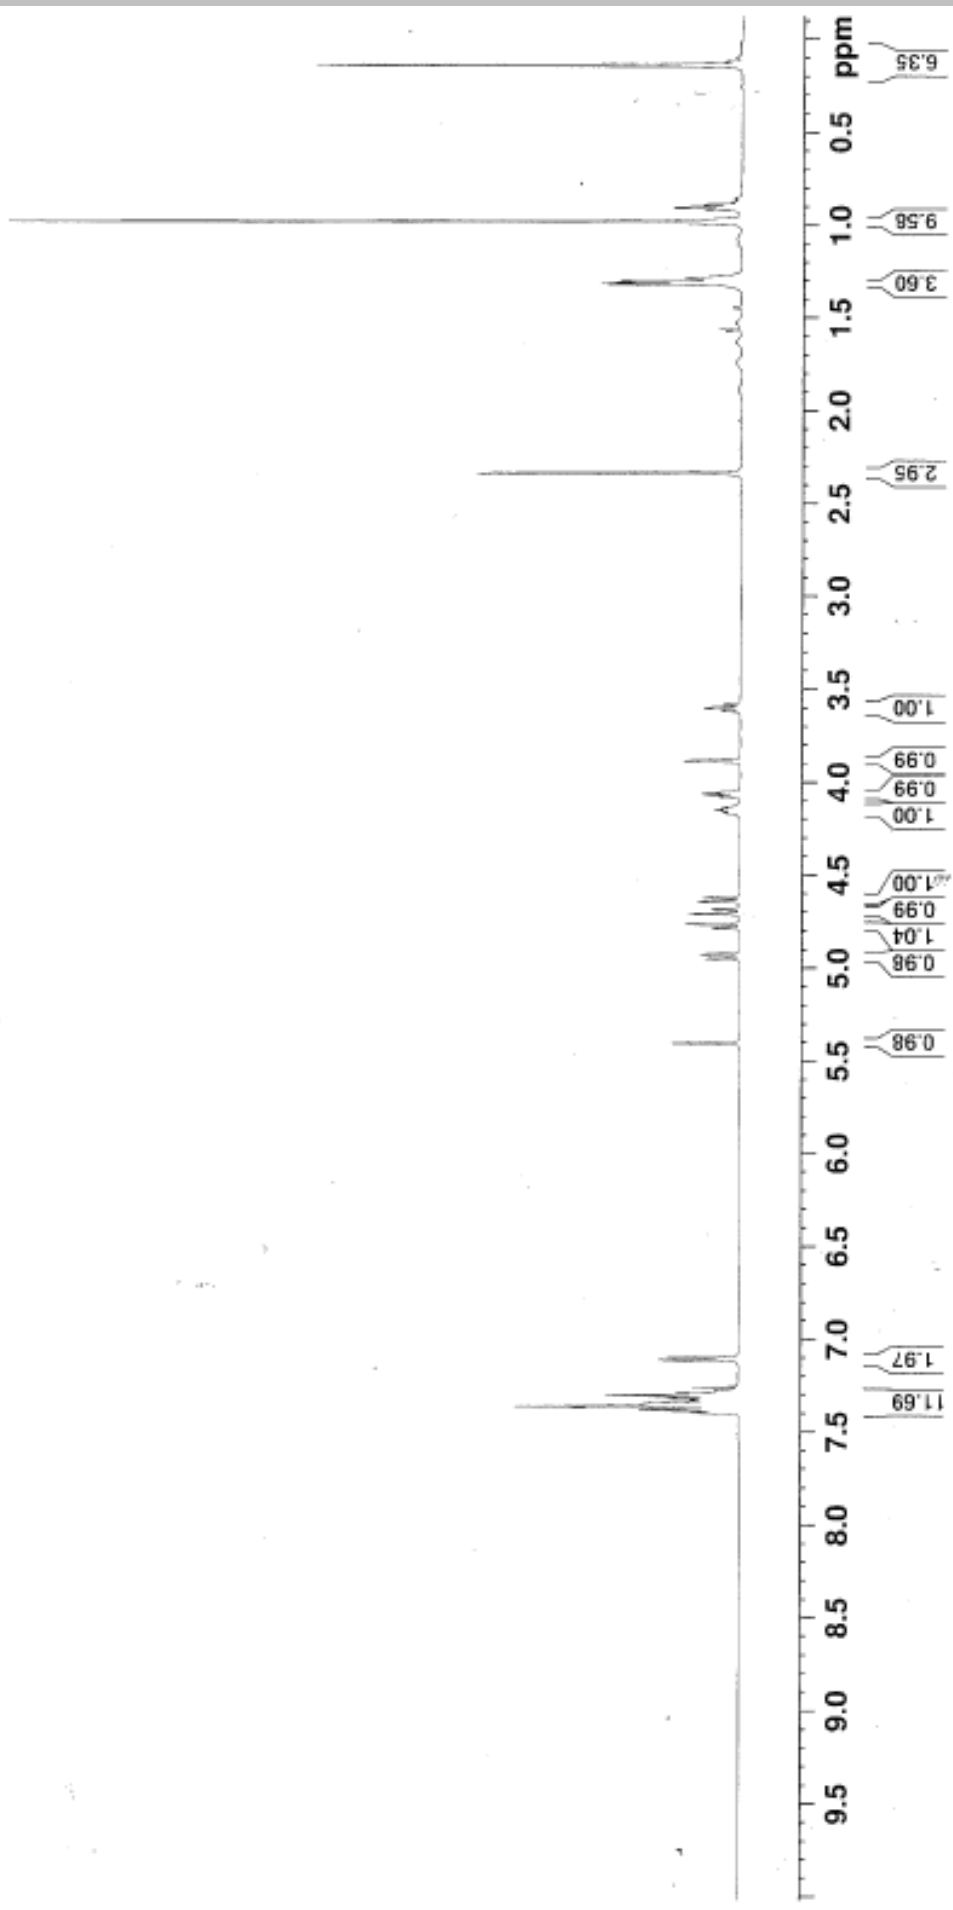

26.03  
21.11  
18.10  
17.88  
4.35  
4.62

86.67  
81.46  
81.00  
77.29  
77.04  
76.78  
75.39  
73.57  
72.91  
69.51

138.62  
138.30  
137.43  
131.89  
131.05  
129.60  
128.34  
128.31  
127.79  
127.71  
127.63  
127.51

Current Data Parameters  
 NAME bgc-03-12-13c  
 EXPNO 1  
 PROCNO 1

F2 - Acquisition Parameters  
 Date\_ 20230322  
 Time 17.45  
 INSTRUM spect  
 PROBHD 5 mm CPPBBO BB  
 PULPROG zgpg30zr.jsh  
 TD 32768  
 SOLVENT CDCl3  
 NS 128  
 DS 0  
 SWH 29761.904 Hz  
 FIDRES 0.908261 Hz  
 AQ 0.5505024 sec  
 RG 132.8  
 DW 16.800 usec  
 DE 19.03 usec  
 TE 299.0 K  
 D1 1.00000000 sec  
 D11 0.03000000 sec  
 D16 0.00020000 sec  
 D20 0.00010000 sec  
 TD0 1

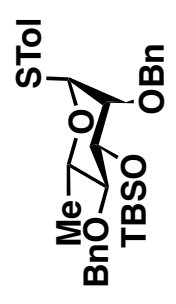

34

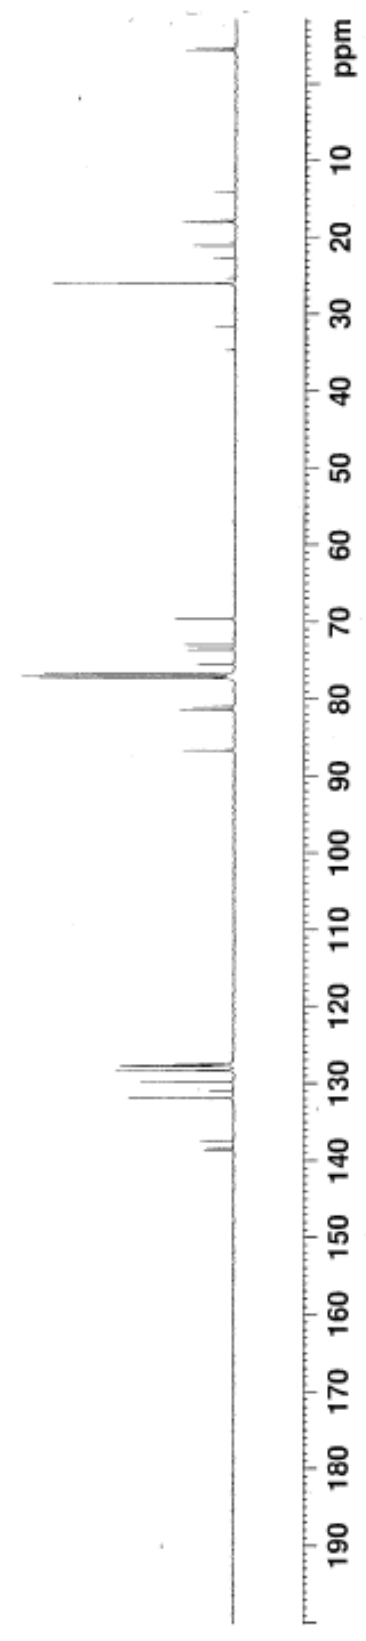

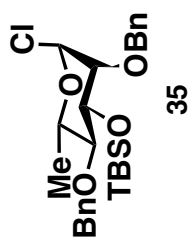

35

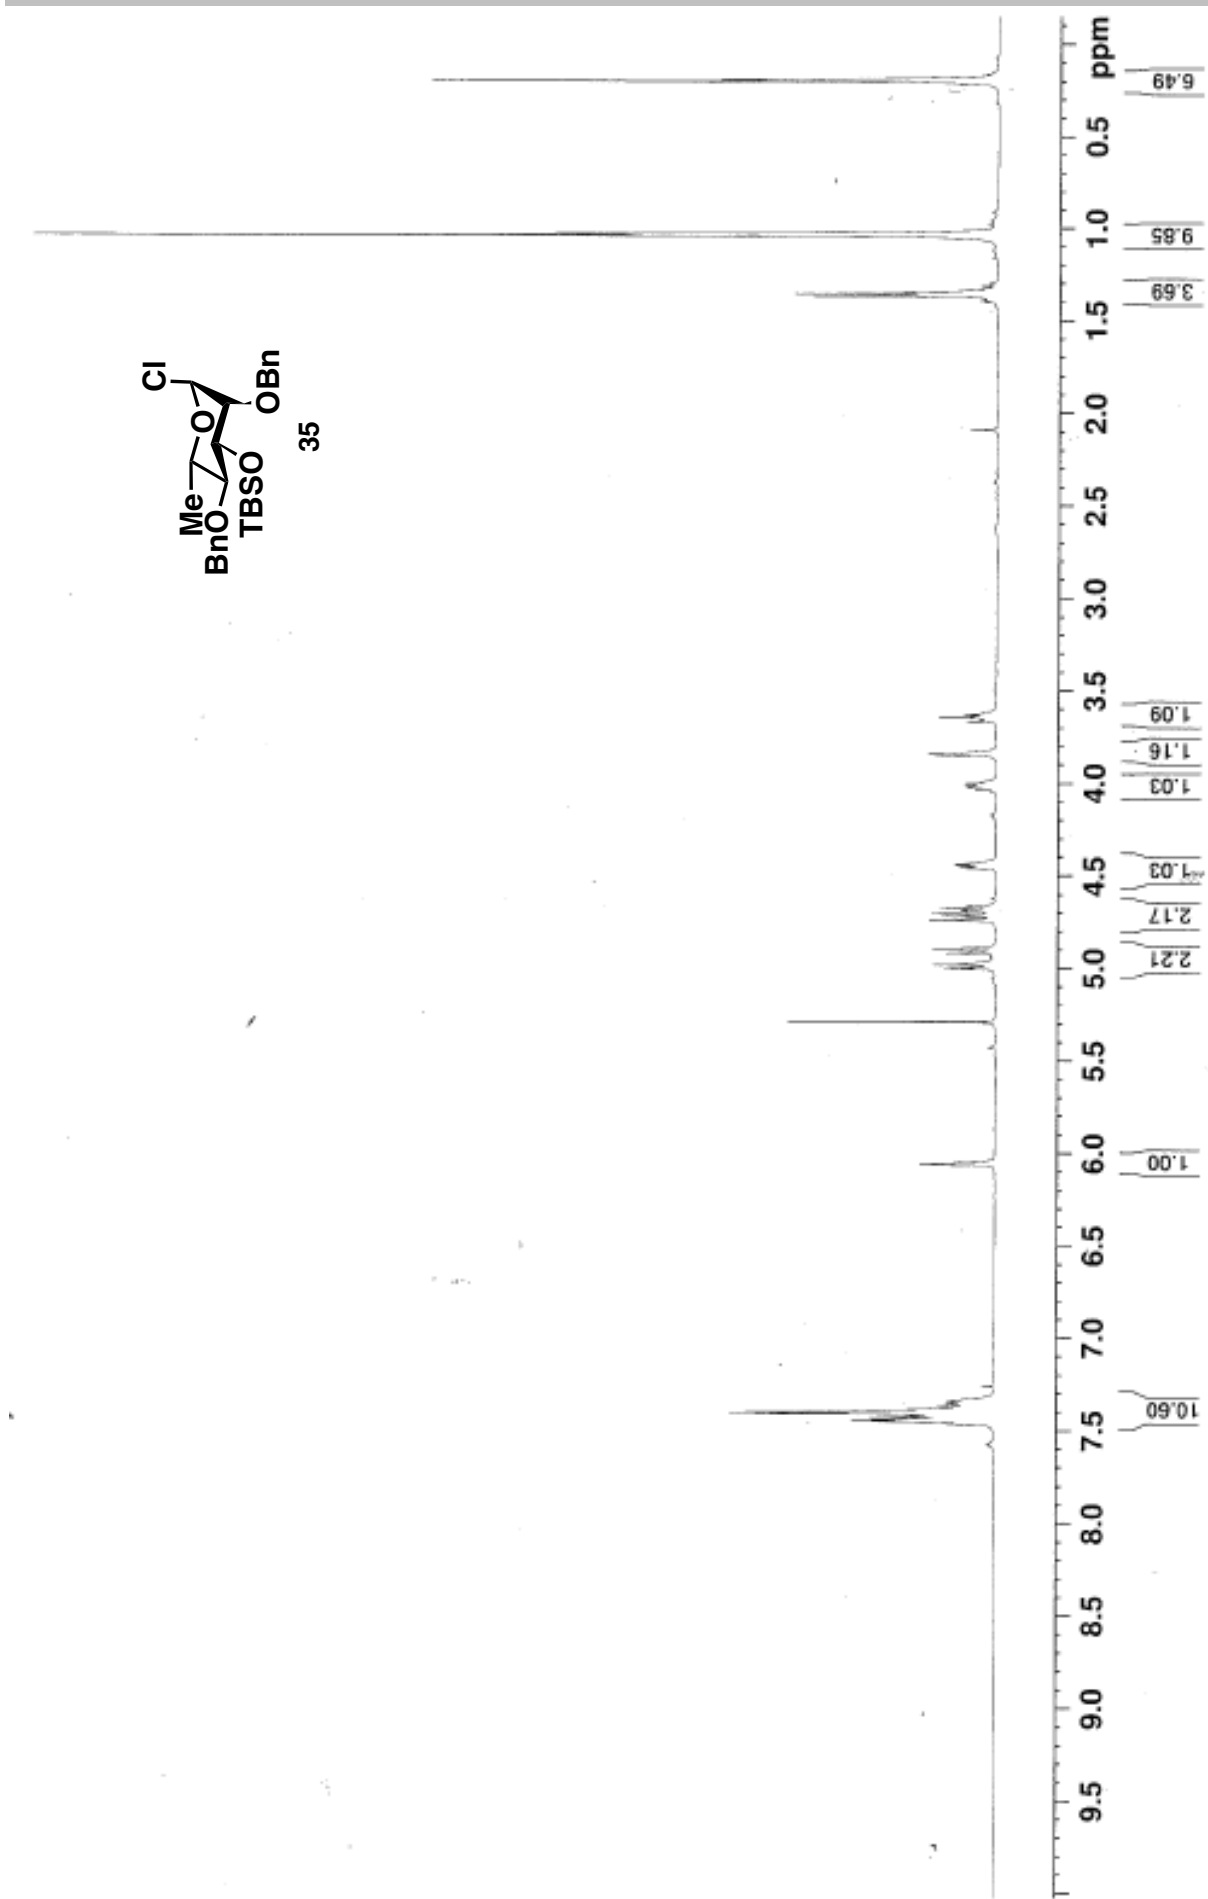

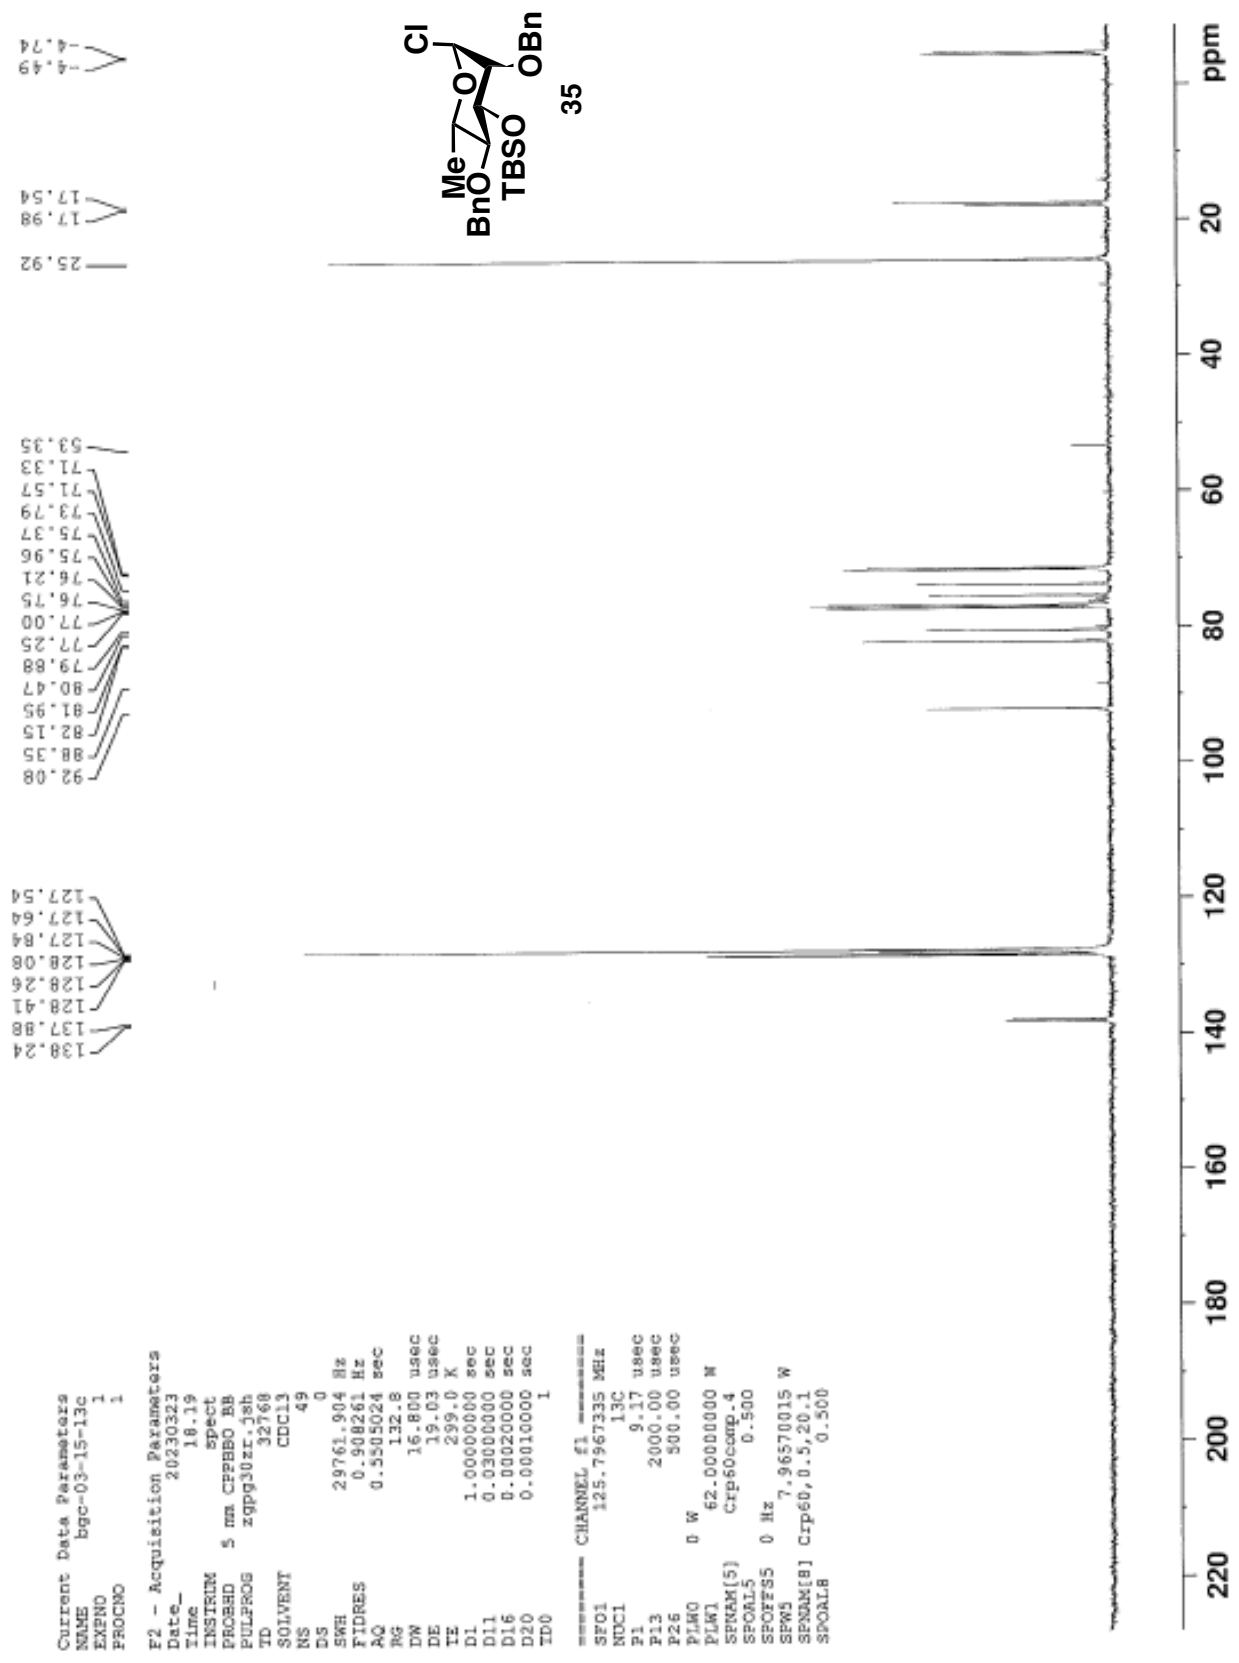

Current Data Parameters  
 NAME Bgc-03-15-13c  
 EXPNO 1  
 PROCNO 1

F2 - Acquisition Parameters  
 Date\_ 20230323  
 Time\_ 18.19  
 INSTRUM spect  
 PROBRD 5 mm CFBBO BB  
 PULPROG zgpg30zr.jsh  
 TD 32768  
 SOLVENT CDCl3  
 NS 49  
 DS 0  
 SWH 23761.904 Hz  
 FIDRES 0.908261 Hz  
 AQ 0.5505024 sec  
 RG 132.8  
 DW 16.800 usec  
 DE 19.03 usec  
 TE 299.0 K  
 D1 1.00000000 sec  
 D11 0.03000000 sec  
 D16 0.00020000 sec  
 D20 0.00010000 sec  
 ID0 1

CHANNEL f1  
 SFO1 125.7967335 MHz  
 NUC1 13C  
 P1 9.17 usec  
 P13 2000.00 usec  
 P25 500.00 usec  
 PLAW 0 W  
 PLW1 62.00000000 M  
 SPNAM(5) Crp60comp.4  
 SPOALS 0.500  
 SPOFFS 0 Hz  
 SPW1 7.36570015 W  
 SPNAM(8) Crp60,0.5,20.1  
 SPOALS 0.500

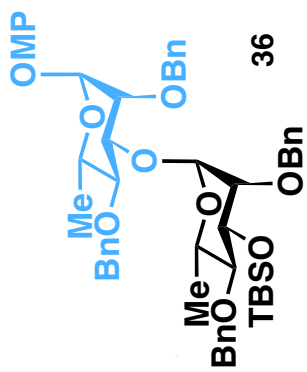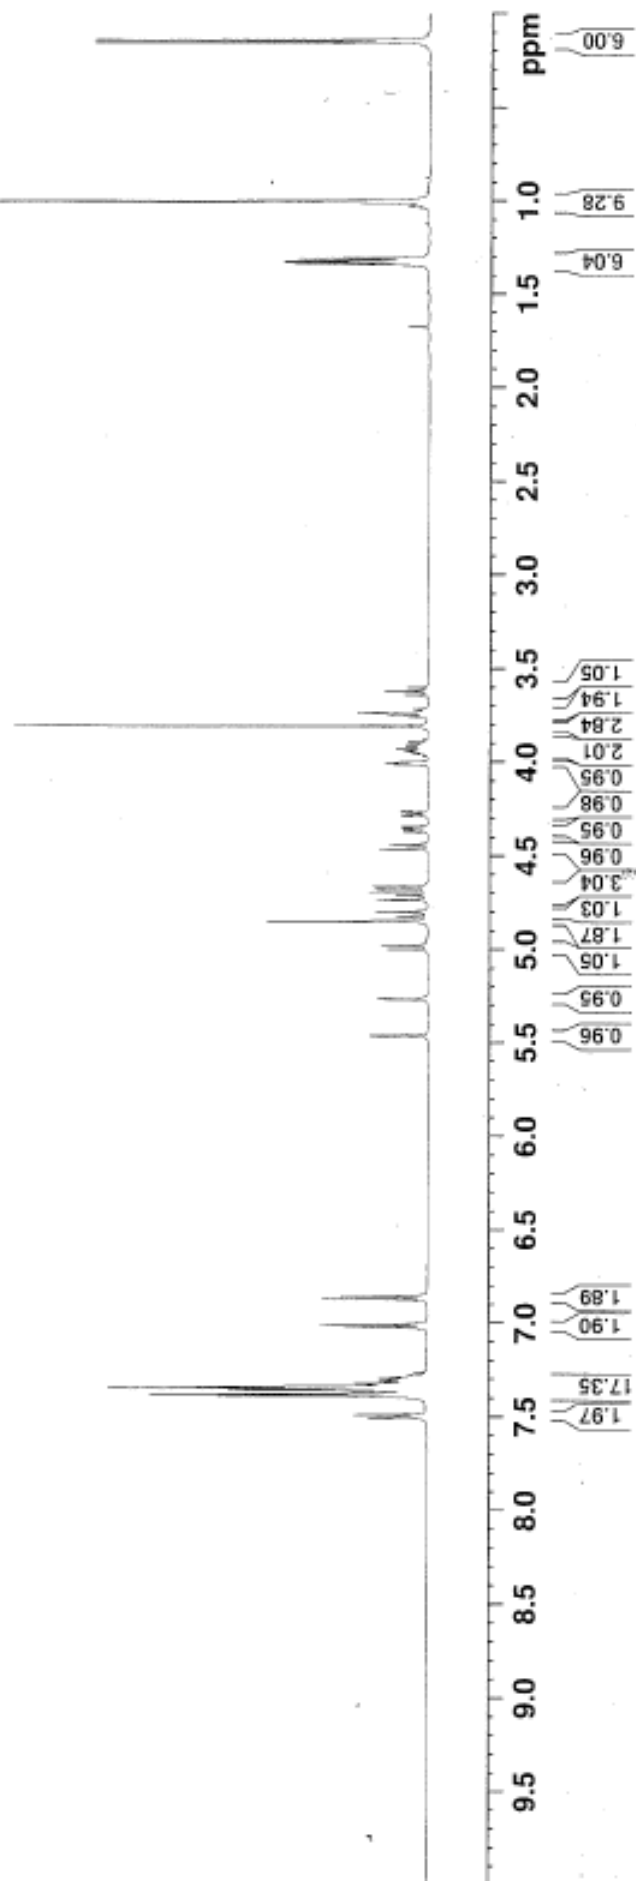

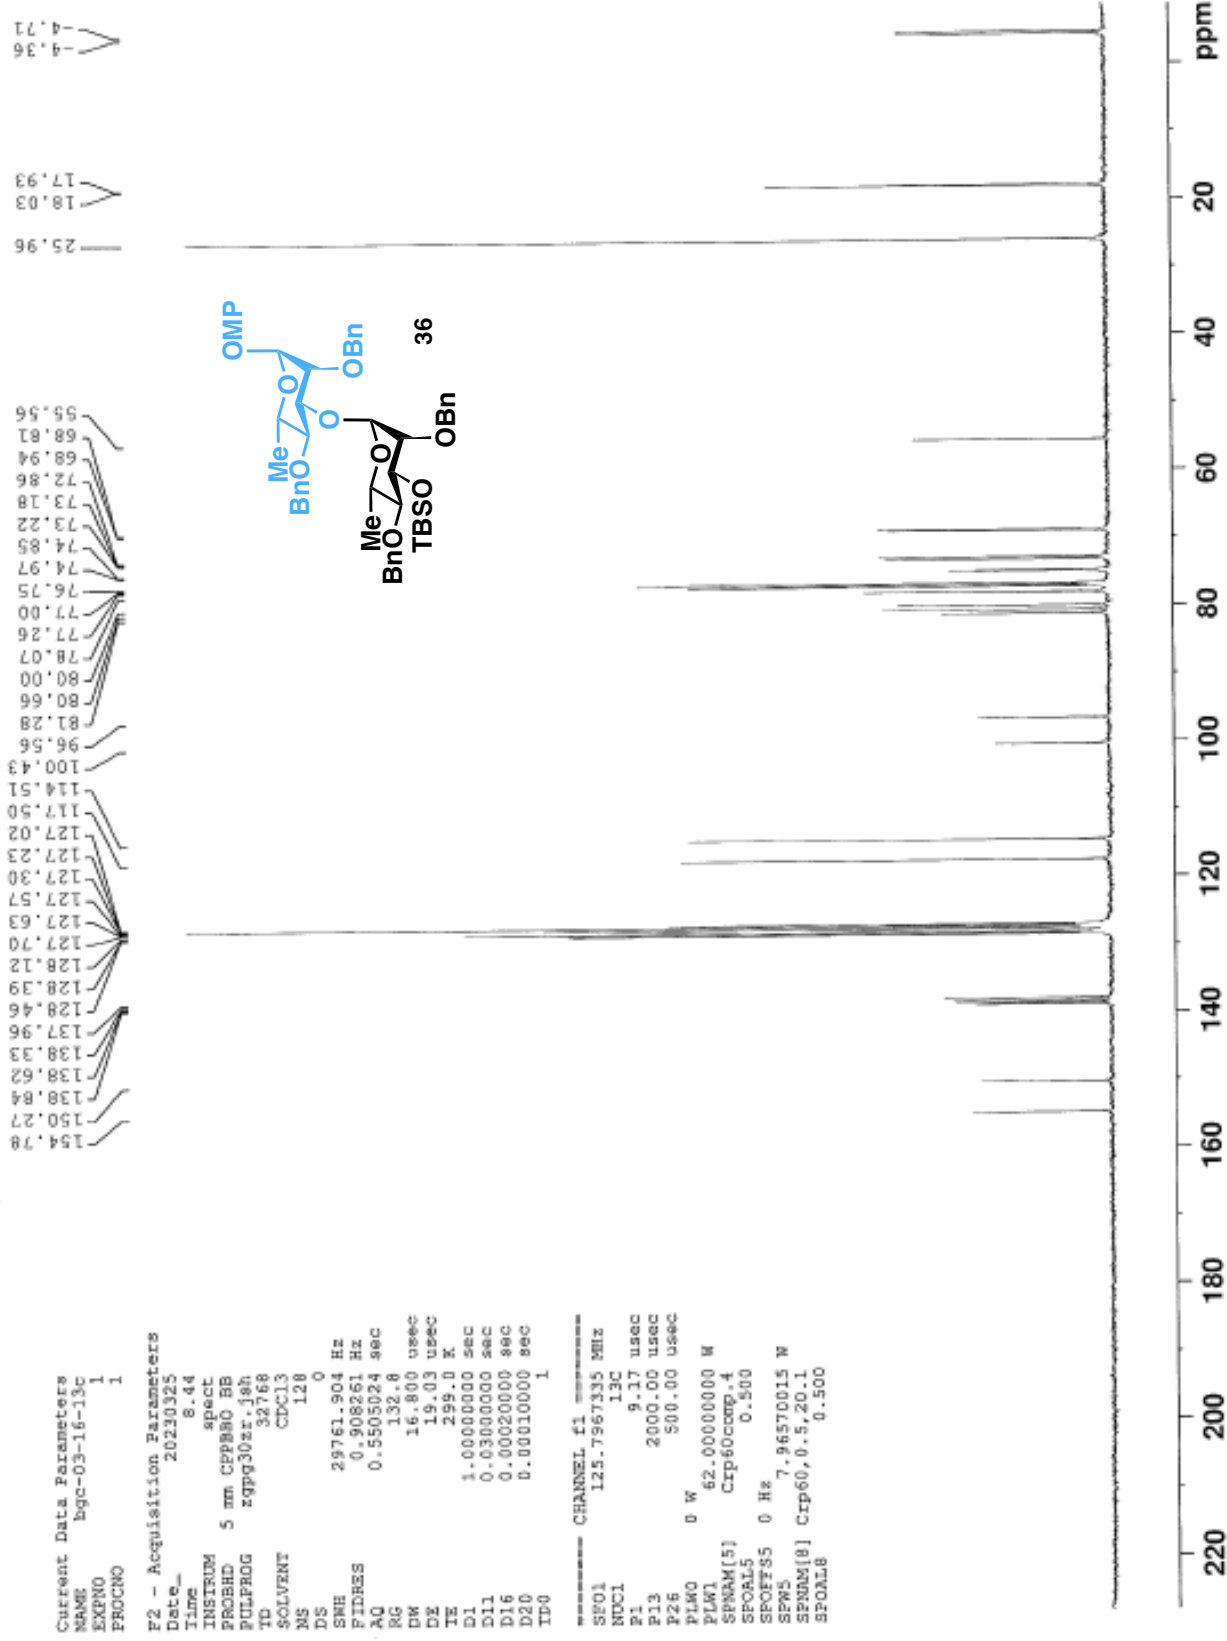

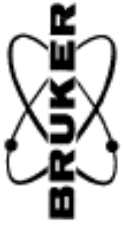

Current Data Parameters  
NAME bqc-03-16-dept  
EXPNO 1  
PROCNO 1

F2 - Acquisition Parameters  
Date\_ 20230325  
Time 8.48  
INSTRUM spect  
PROBHD 5 mm CPBBO BB  
PULPROG dept  
TD 32768  
SOLVENT CDCl3  
NS 50  
DS 0  
SWH 23761.904 Hz  
FIDRES 0.908261 Hz  
AQ 0.5545024 sec  
RG 132.8  
DN 16.800 usec  
DE 18.00 usec  
TE 299.0 K  
CNS12 145.0000000  
CNS11 1.5000000  
D1 1.00000000 sec  
D2 0.00344828 sec  
D12 0.00002000 sec  
TD0 1

128.58  
128.51  
128.24  
127.83  
127.76  
127.70  
127.42  
127.36  
127.14  
117.62  
114.63  
100.56  
96.68  
81.40  
80.78  
80.13  
79.19  
77.36  
76.85  
73.50  
69.07  
68.93  
55.68  
28.09  
18.16  
18.05  
14.24  
4.50

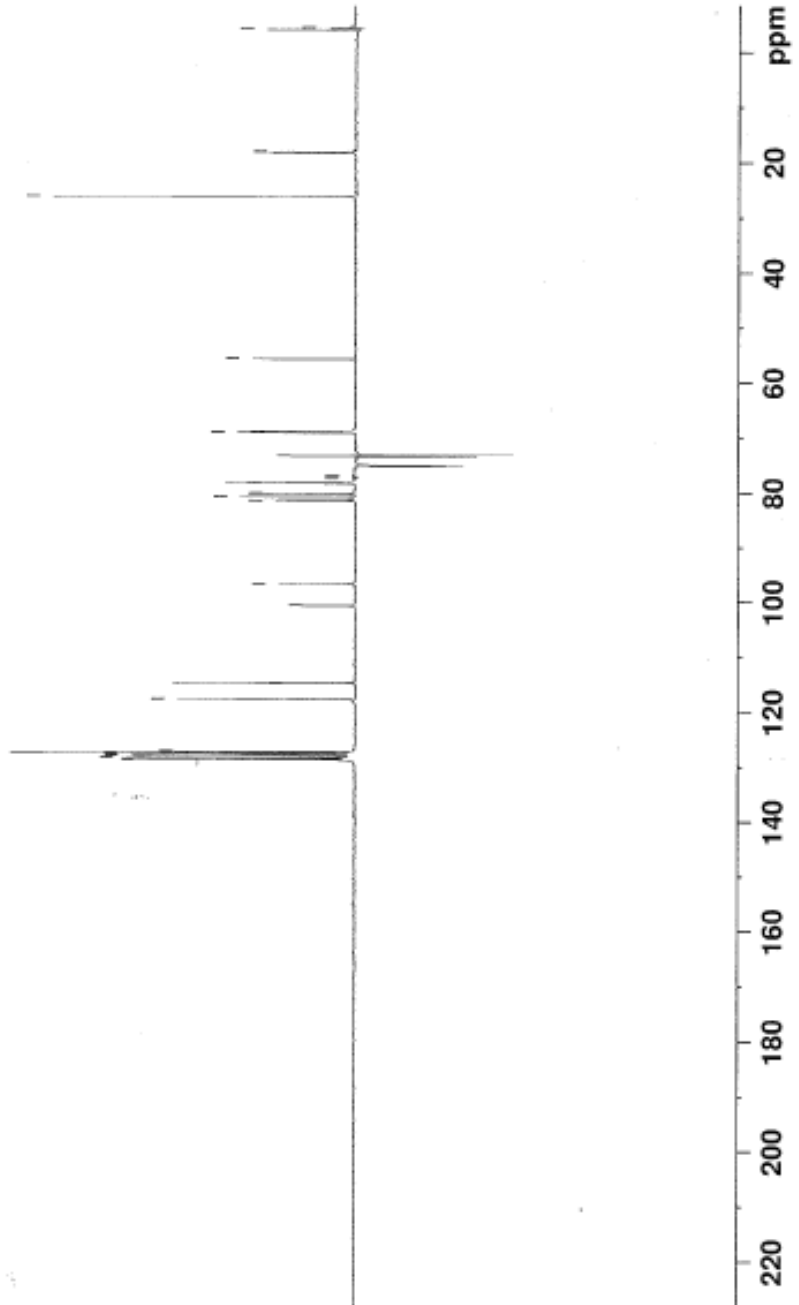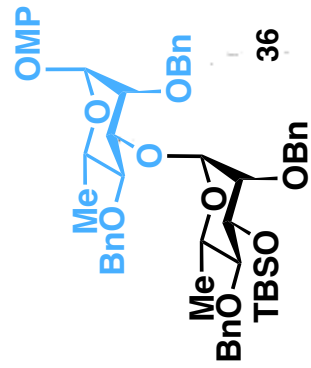

|  |  |  |  |
|--|--|--|--|
|  |  |  |  |
|  |  |  |  |
|  |  |  |  |

Exe-03-16-hsqc 1 1 /home/localnmr/cenlow/nmr

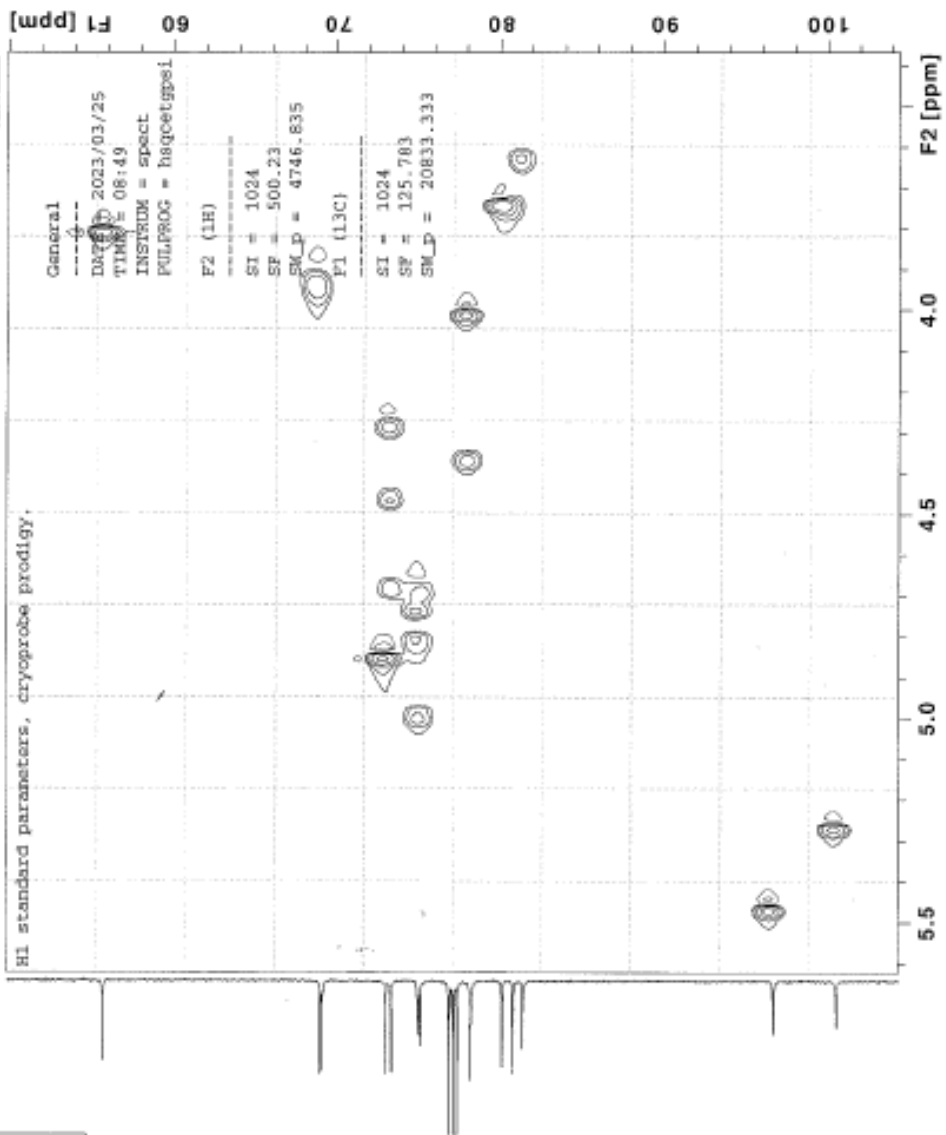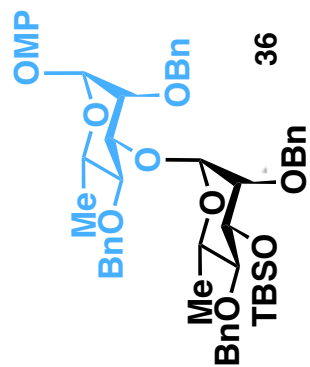



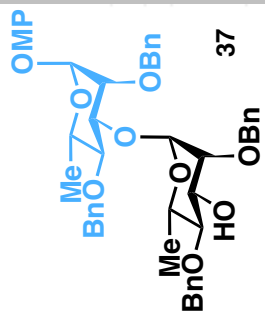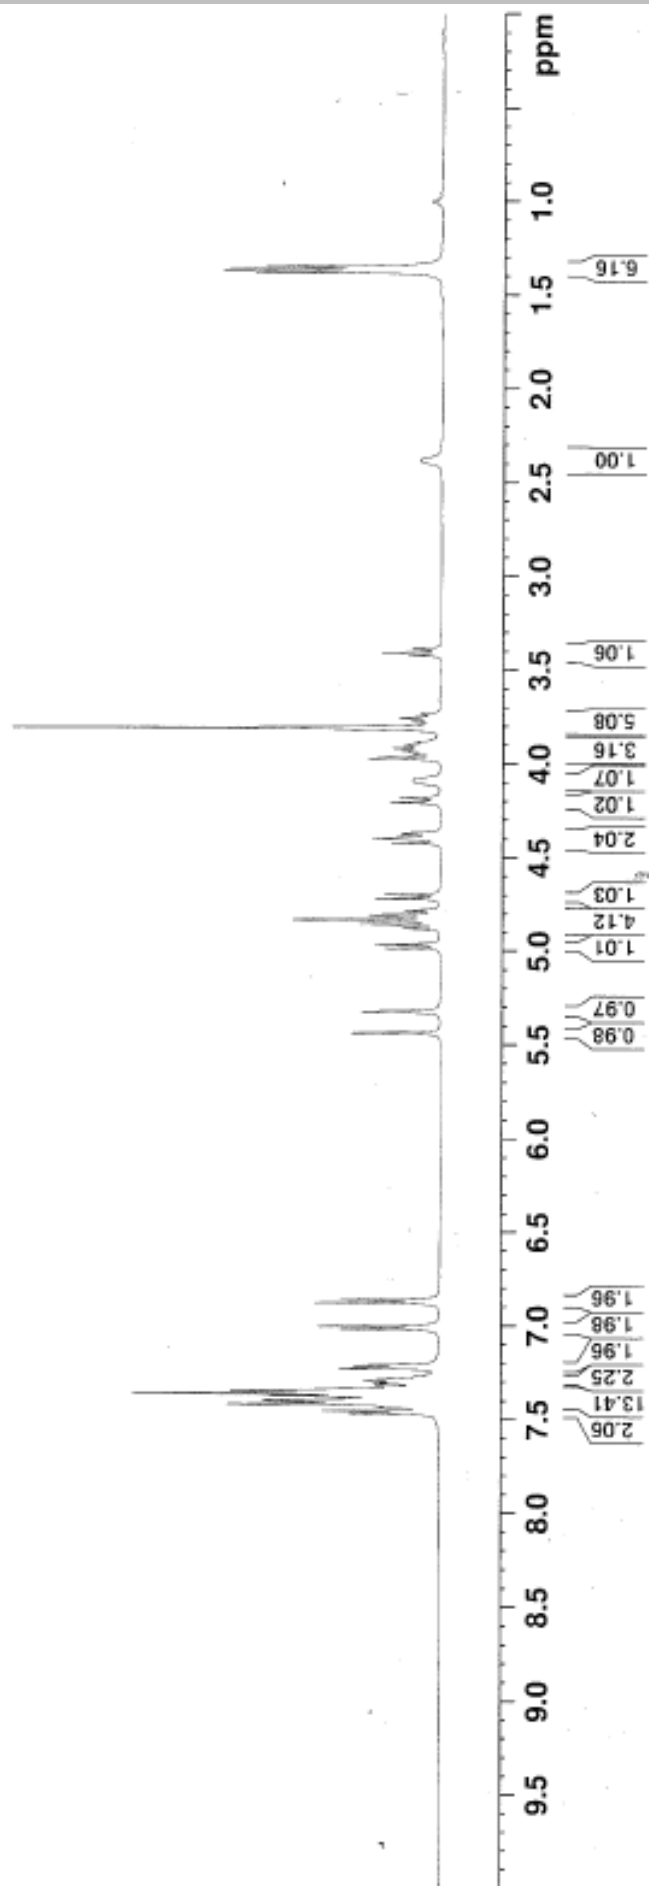

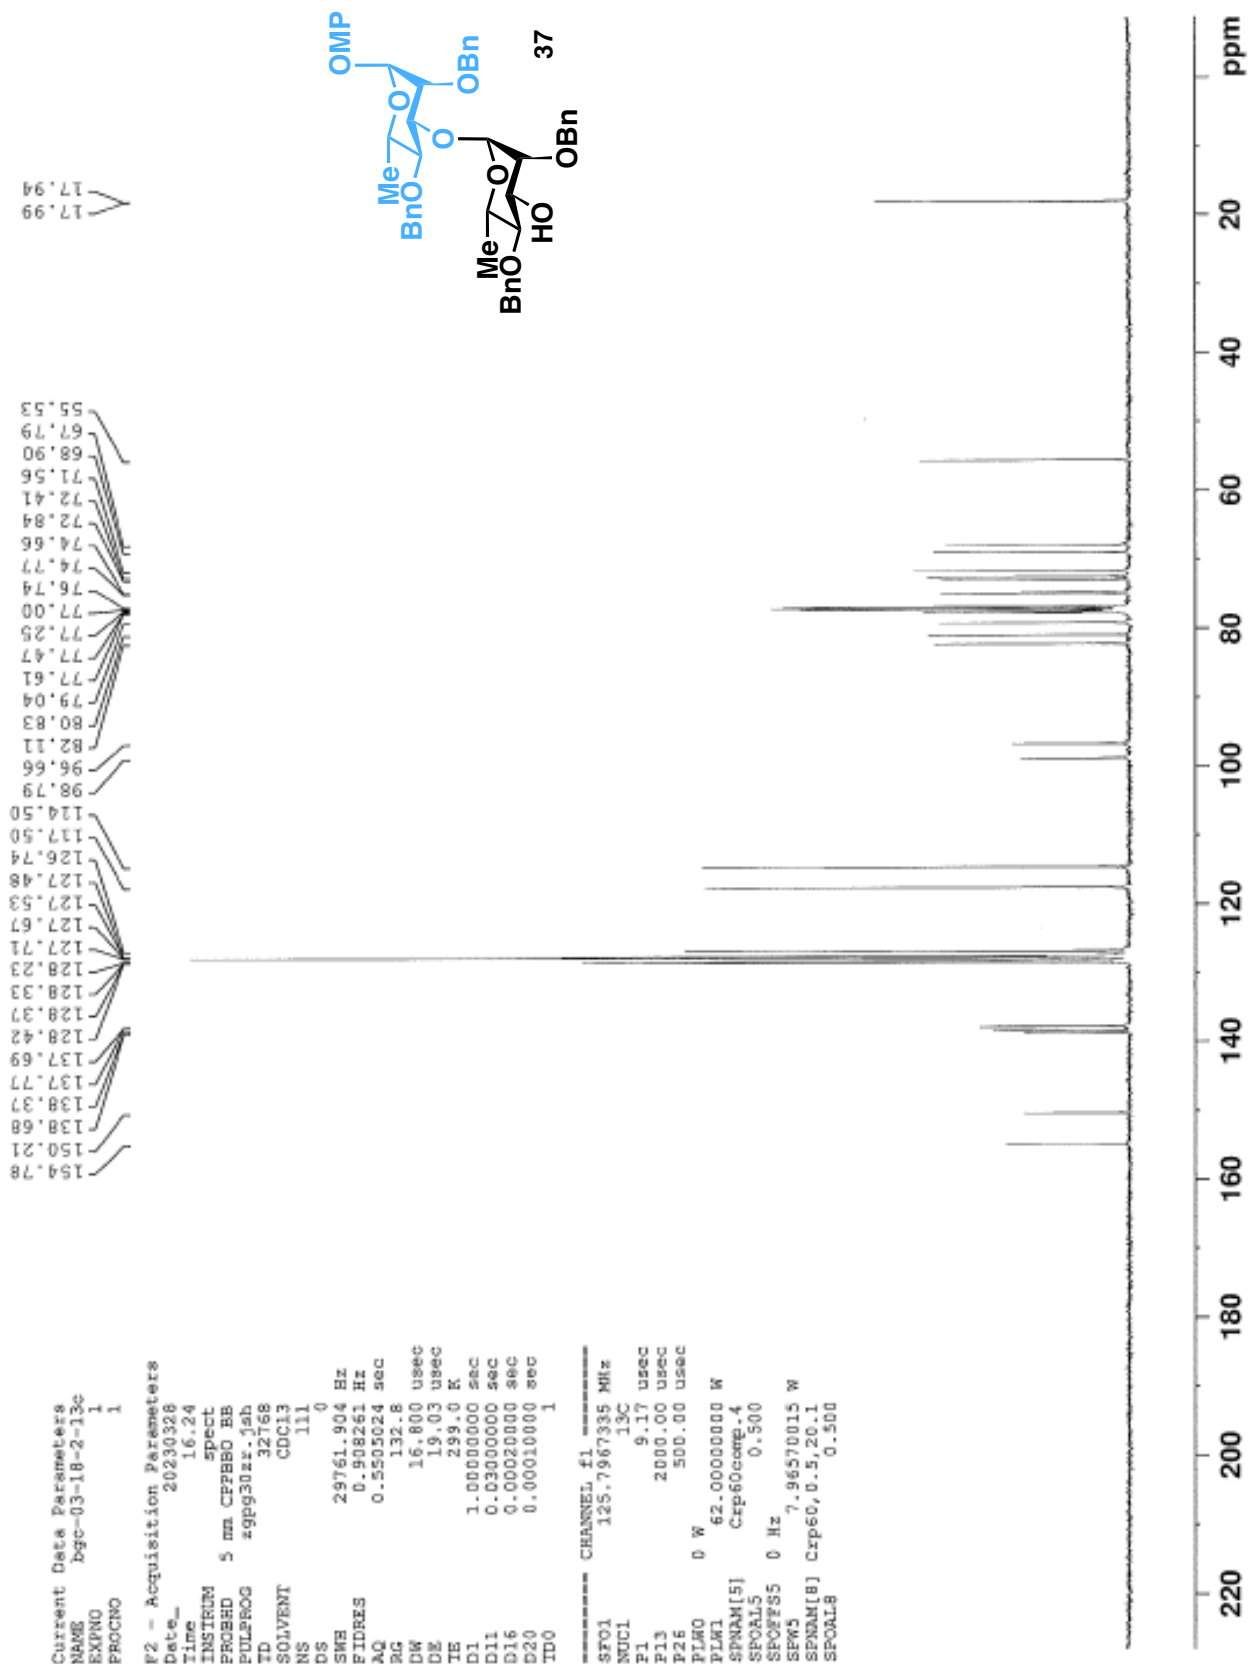

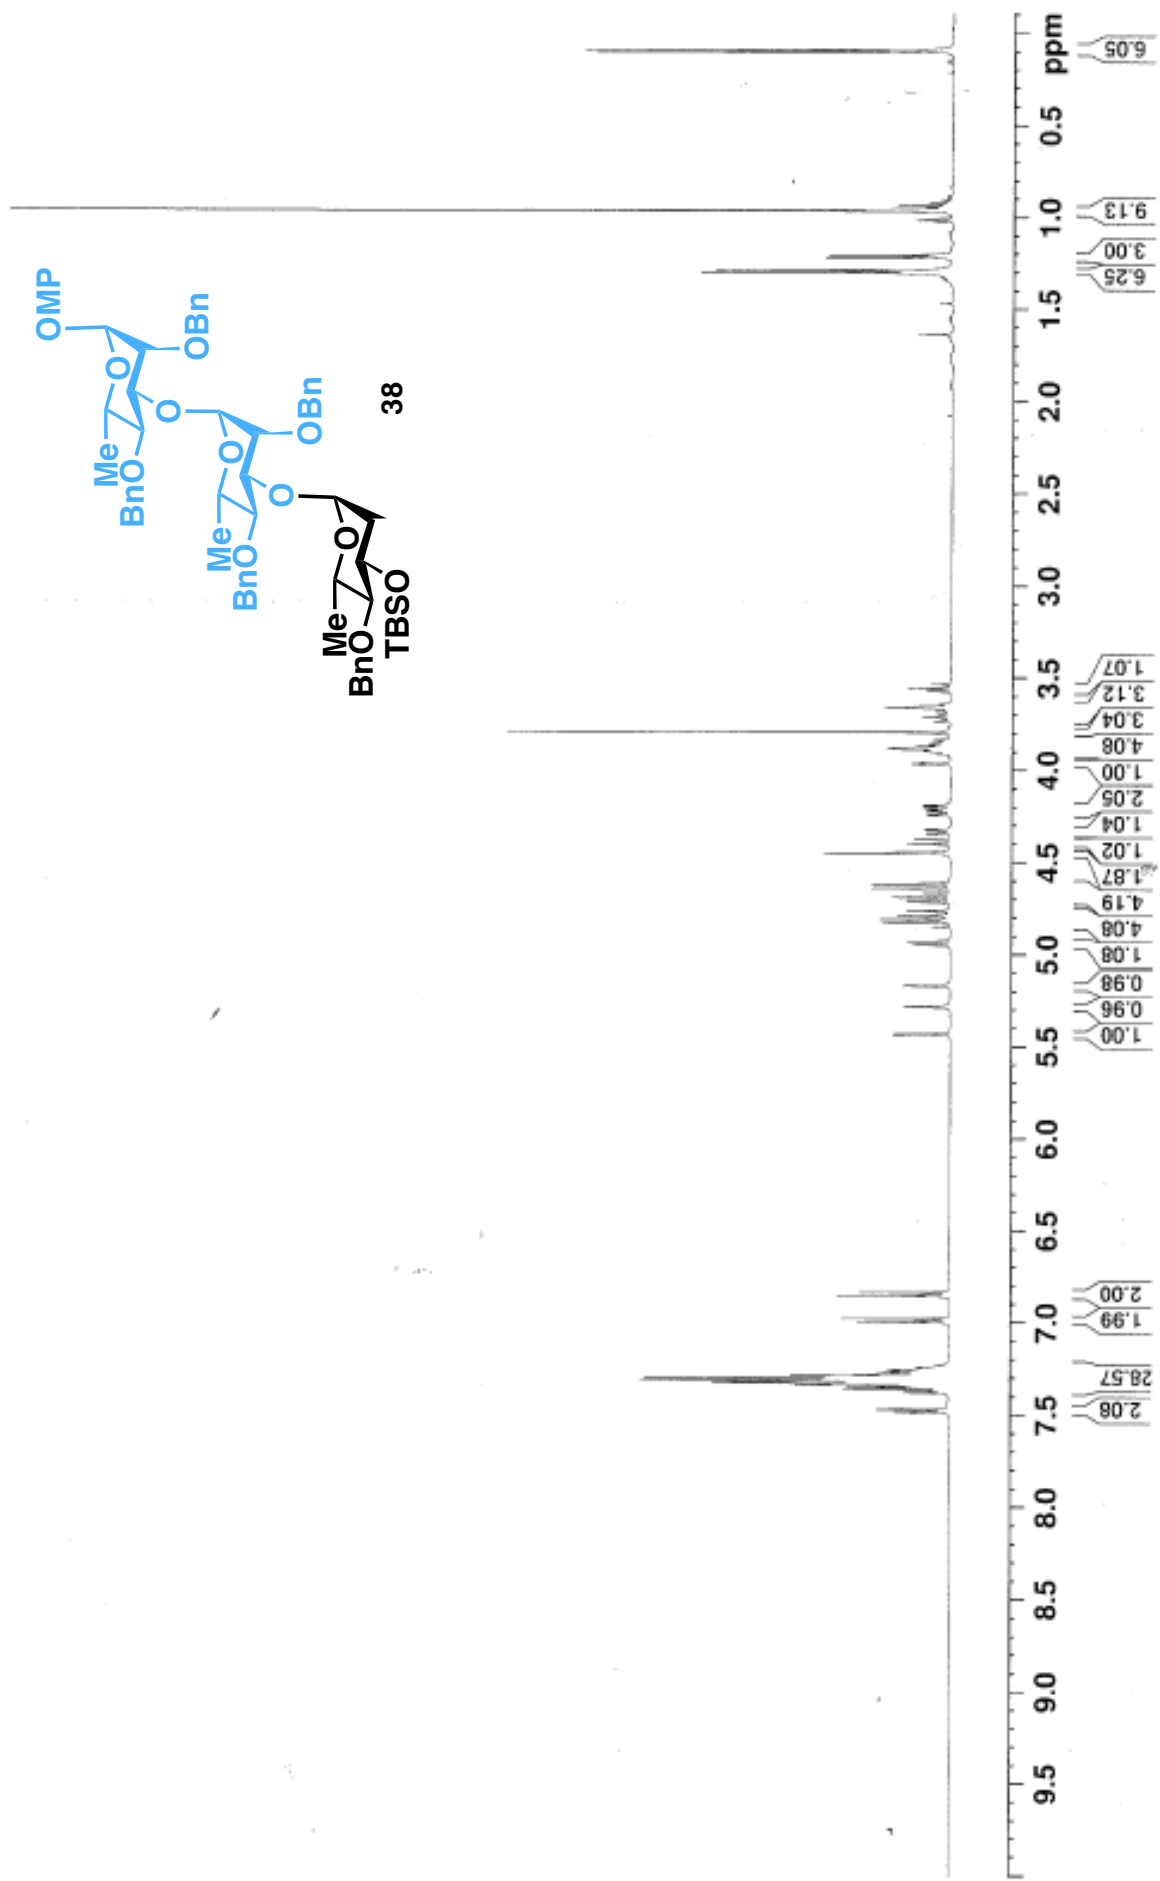

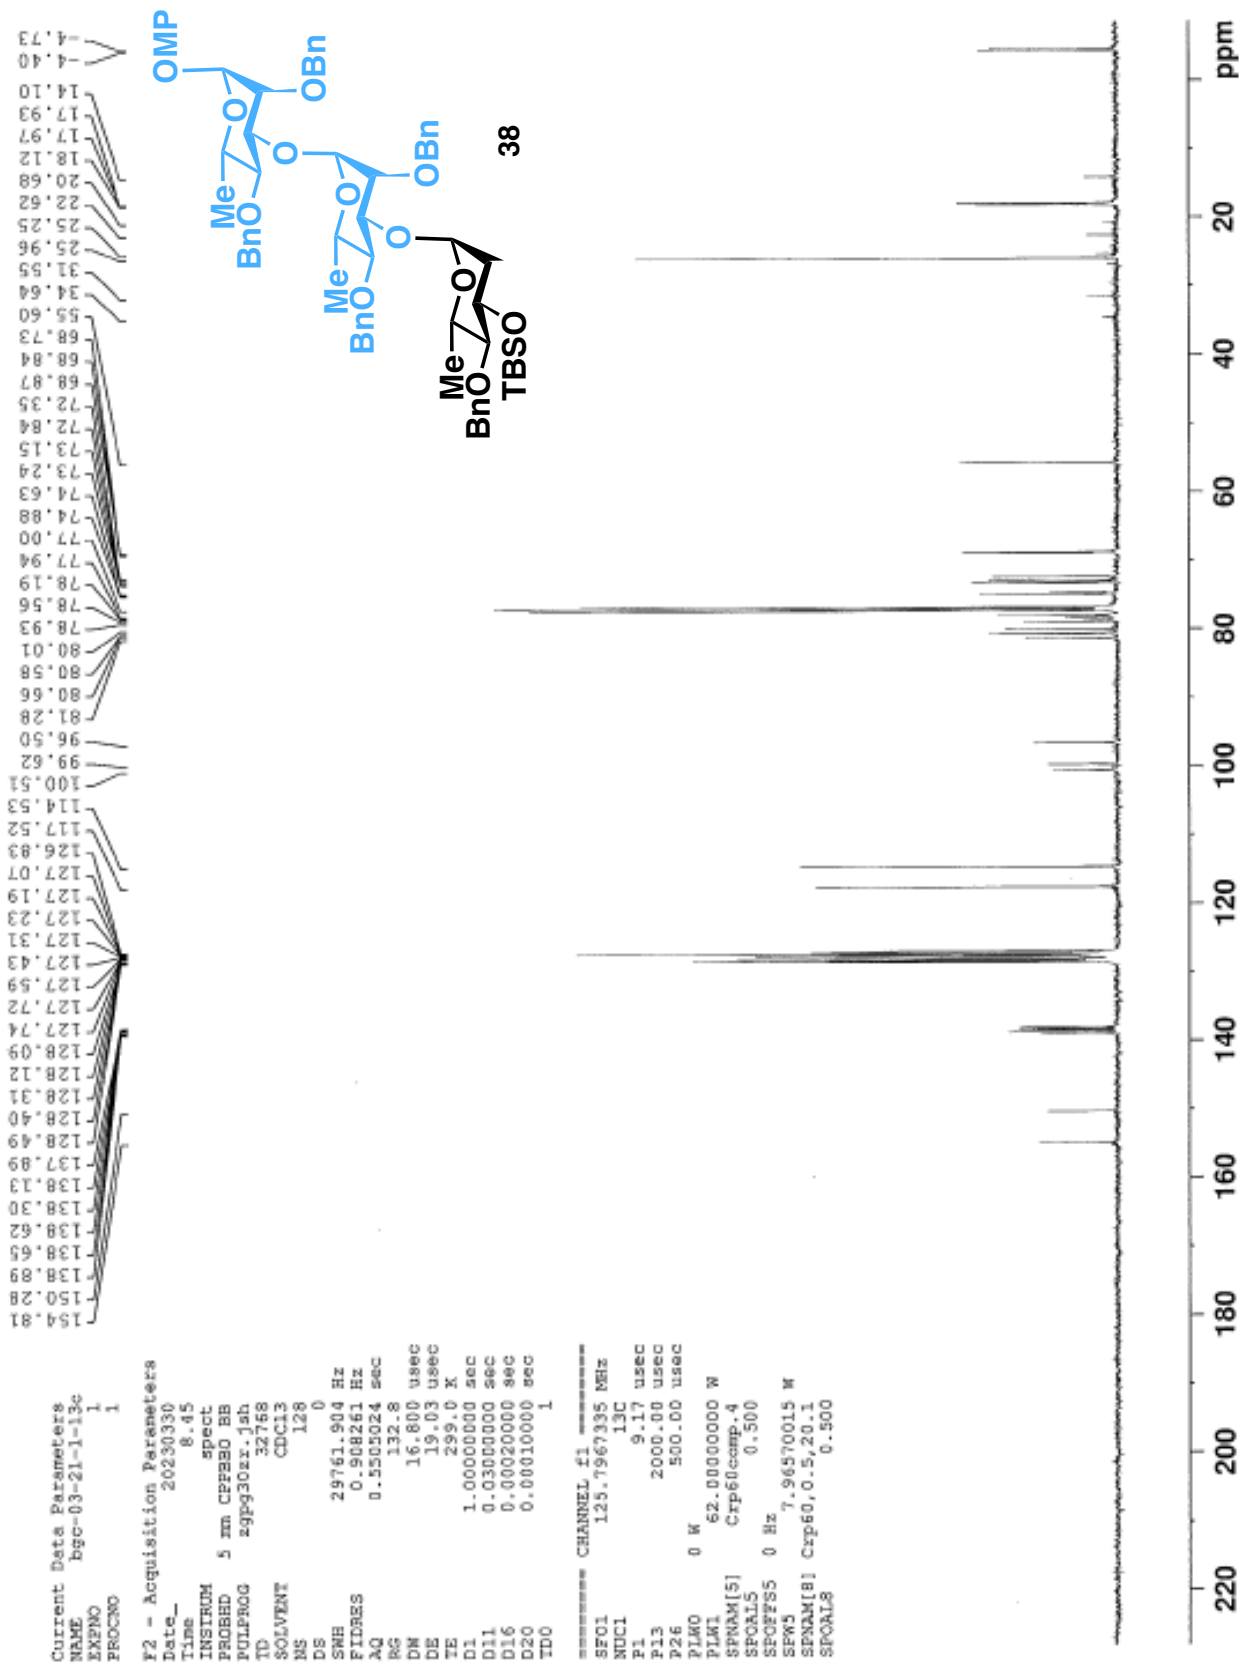

154.491  
150.228  
138.899  
138.655  
138.622  
138.330  
138.133  
137.899  
128.499  
128.400  
128.311  
128.122  
128.099  
127.744  
127.722  
127.599  
127.433  
127.311  
127.233  
127.199  
127.077  
126.899  
117.522  
114.533  
100.511  
99.622  
96.500  
81.288  
80.666  
80.588  
80.011  
78.933  
78.566  
78.199  
77.944  
77.000  
74.888  
74.633  
73.244  
73.155  
72.844  
72.355  
68.877  
68.844  
68.733  
55.600  
34.644  
31.555  
25.966  
25.255  
22.622  
20.688  
18.122  
17.977  
17.933  
14.100  
4.400  
-4.733

Current Data Parameters  
 NAME bcc-03-21-1-13c  
 EXNO 1  
 PROCNO 1

F2 - Acquisition Parameters  
 Date\_ 20230330  
 Time 8.45  
 INSTRUM spect  
 PROBHD 5 mm CFPABO BB  
 PULPROG zgpg30sz.7sh  
 TD 32768  
 SOLVENT CDCl3  
 NS 128  
 DS 0  
 SWH 29761.904 Hz  
 FIDRES 0.508261 Hz  
 AQ 0.5505024 sec  
 RG 132.8  
 DW 16.800 usec  
 DE 19.03 usec  
 TE 299.0 K  
 D1 1.00000000 sec  
 D11 0.03000000 sec  
 D16 0.00020000 sec  
 D20 0.00010000 sec  
 TDO 1

===== CHANNEL f1 =====  
 SFO1 125.7967335 MHz  
 NUC1 13C  
 P1 9.17 usec  
 PL1 2000.00 usec  
 F2 500.00 usec  
 PL20 0 W  
 PL21 62.00000000 W  
 SFOA1[5] Cfp60comp.4  
 SFOA1S 0.500  
 SFOFFS 0 Hz  
 SF05 7.96570015 W  
 SFNAM[8] Cfp60.0.5.20.1  
 SFOA1S 0.500

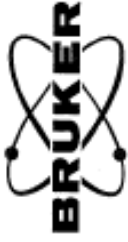

Current Data Parameters  
NAME bgc-03-21-1-dept  
EXPNO 1  
PROCNO 1

F2 - Acquisition Parameters  
Date\_ 20230330  
Time 8.46  
INSTRUM spect  
PROBHD 5 mm CFPBBO B3  
PULPROG dept  
TD 32768  
SOLVENT CDCl3  
NS 128  
DS 0  
SWH 29761.904 Hz  
FIDRES 0.908261 Hz  
AQ 0.5505024 sec  
RG 132.8  
DM 16.800 usec  
DE 18.00 usec  
TE 299.0 K  
CNST1 145.0000000  
CNST12 1.5000000  
D1 1.00000000 sec  
D2 0.0034828 sec  
D12 0.00002000 sec  
TD0 1

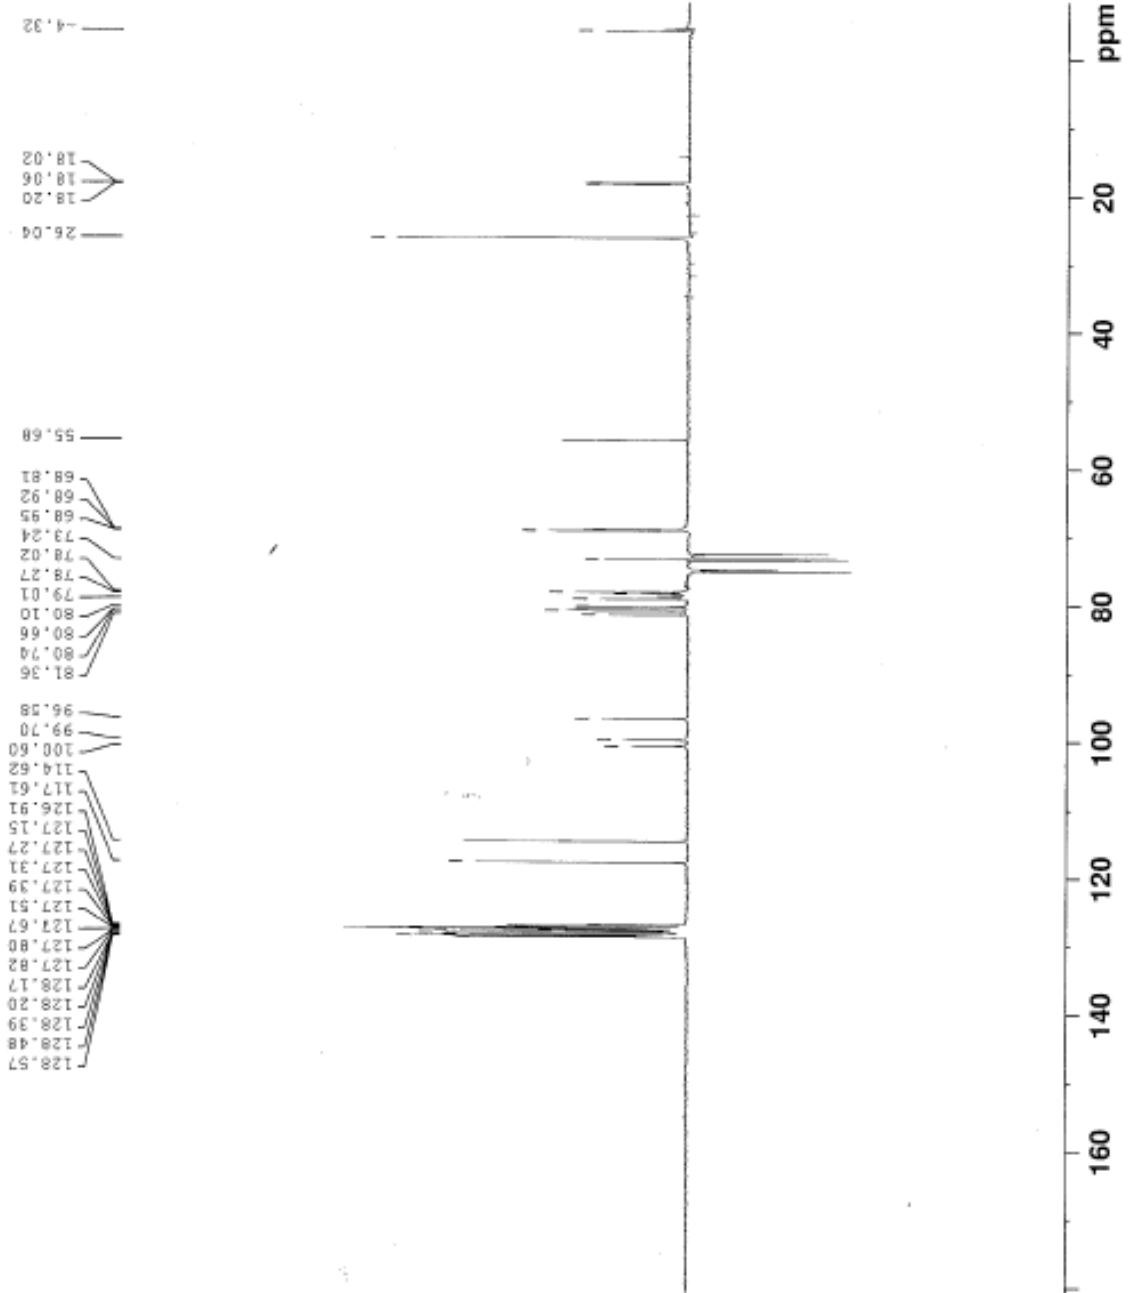

logr-03-21-1-haegc 1 1 /home/Localnmr/cenlow/nmr

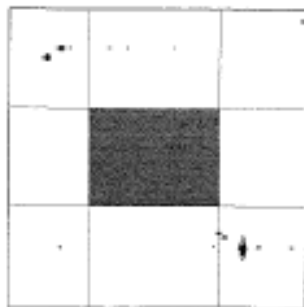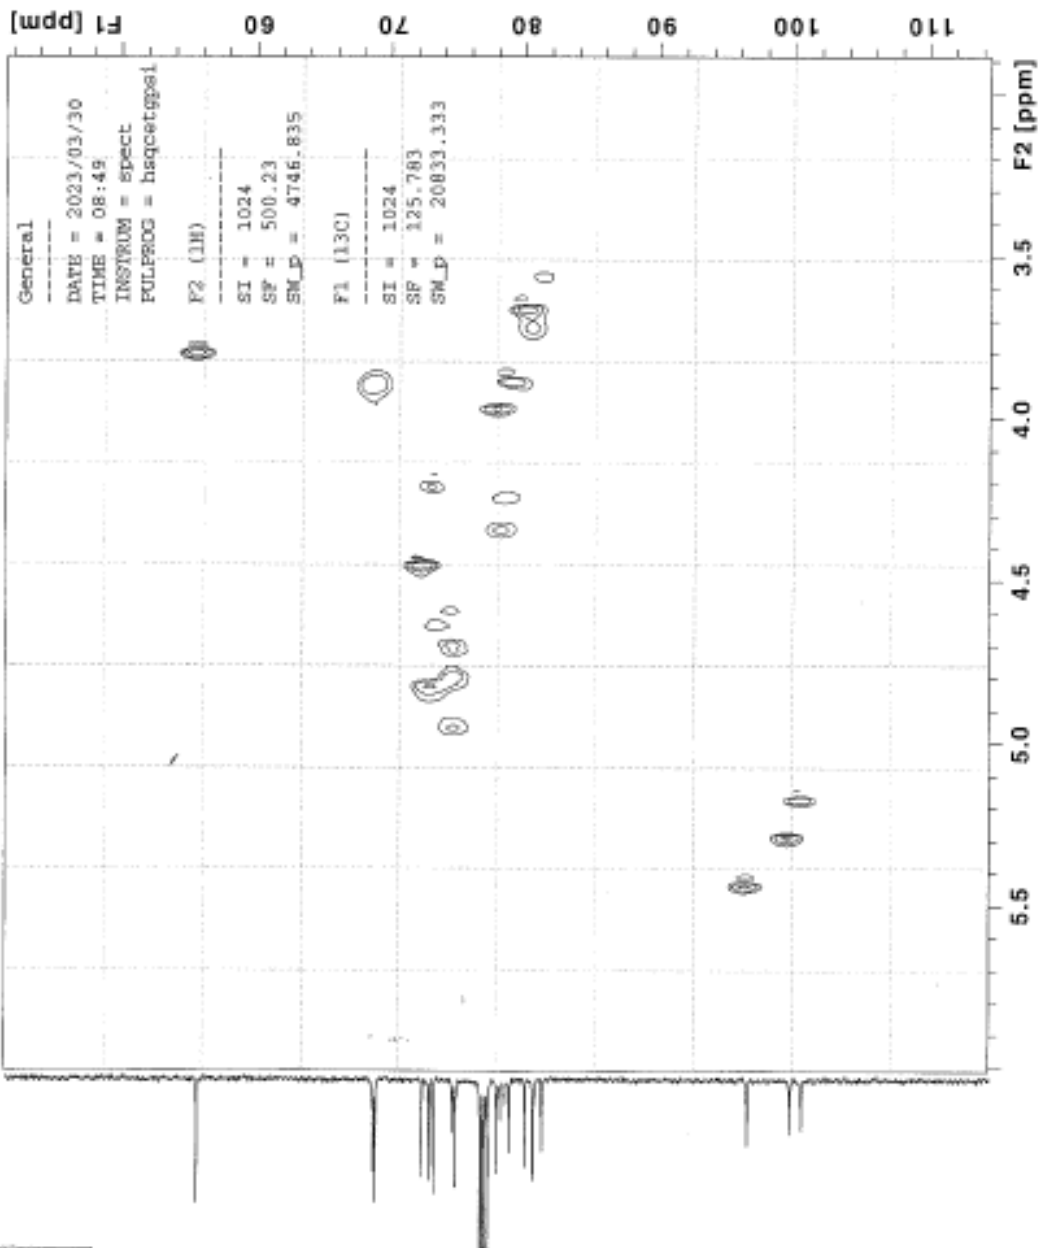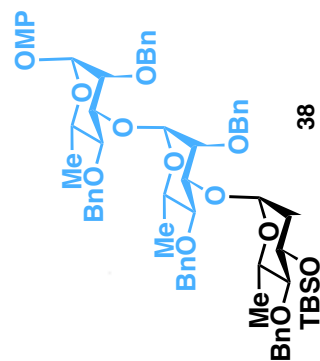

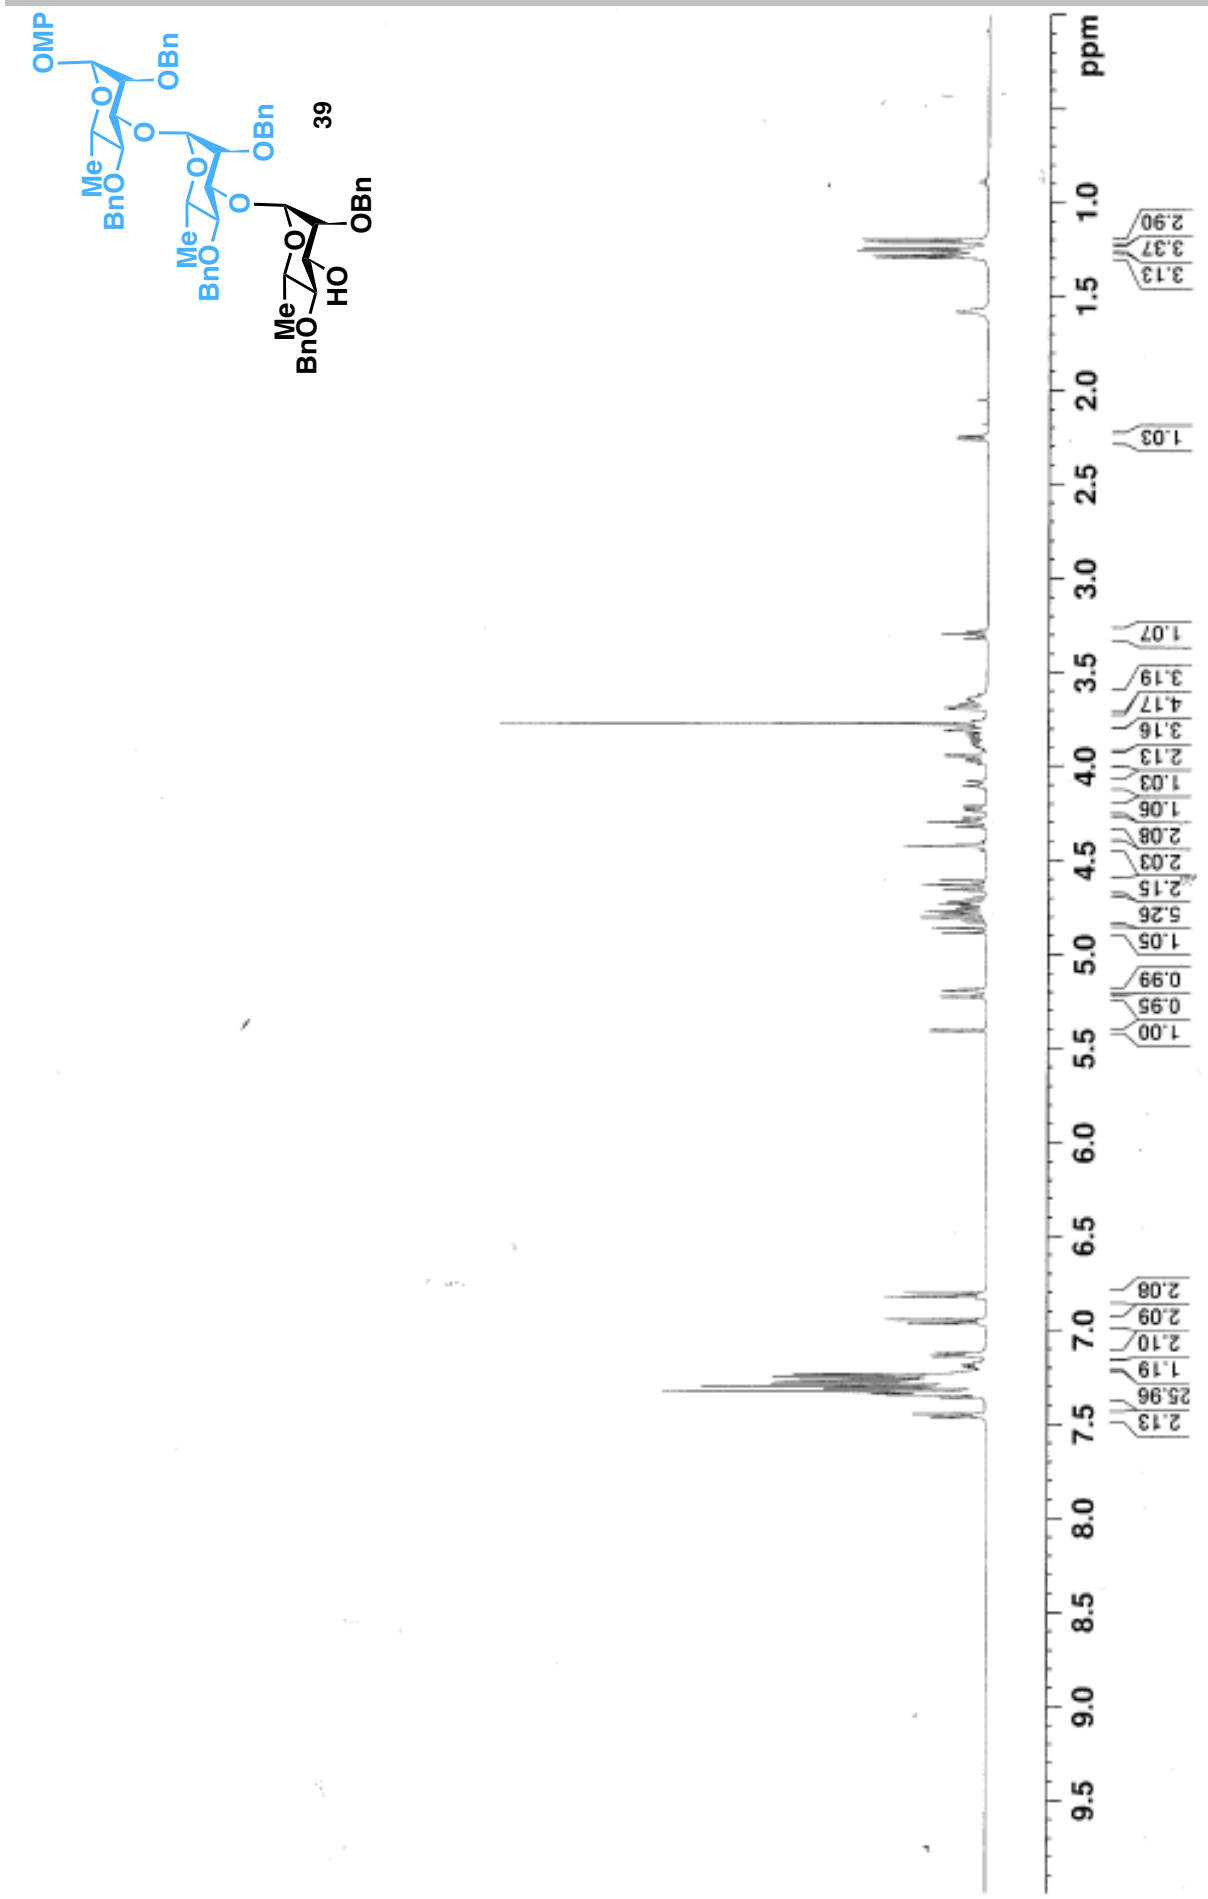

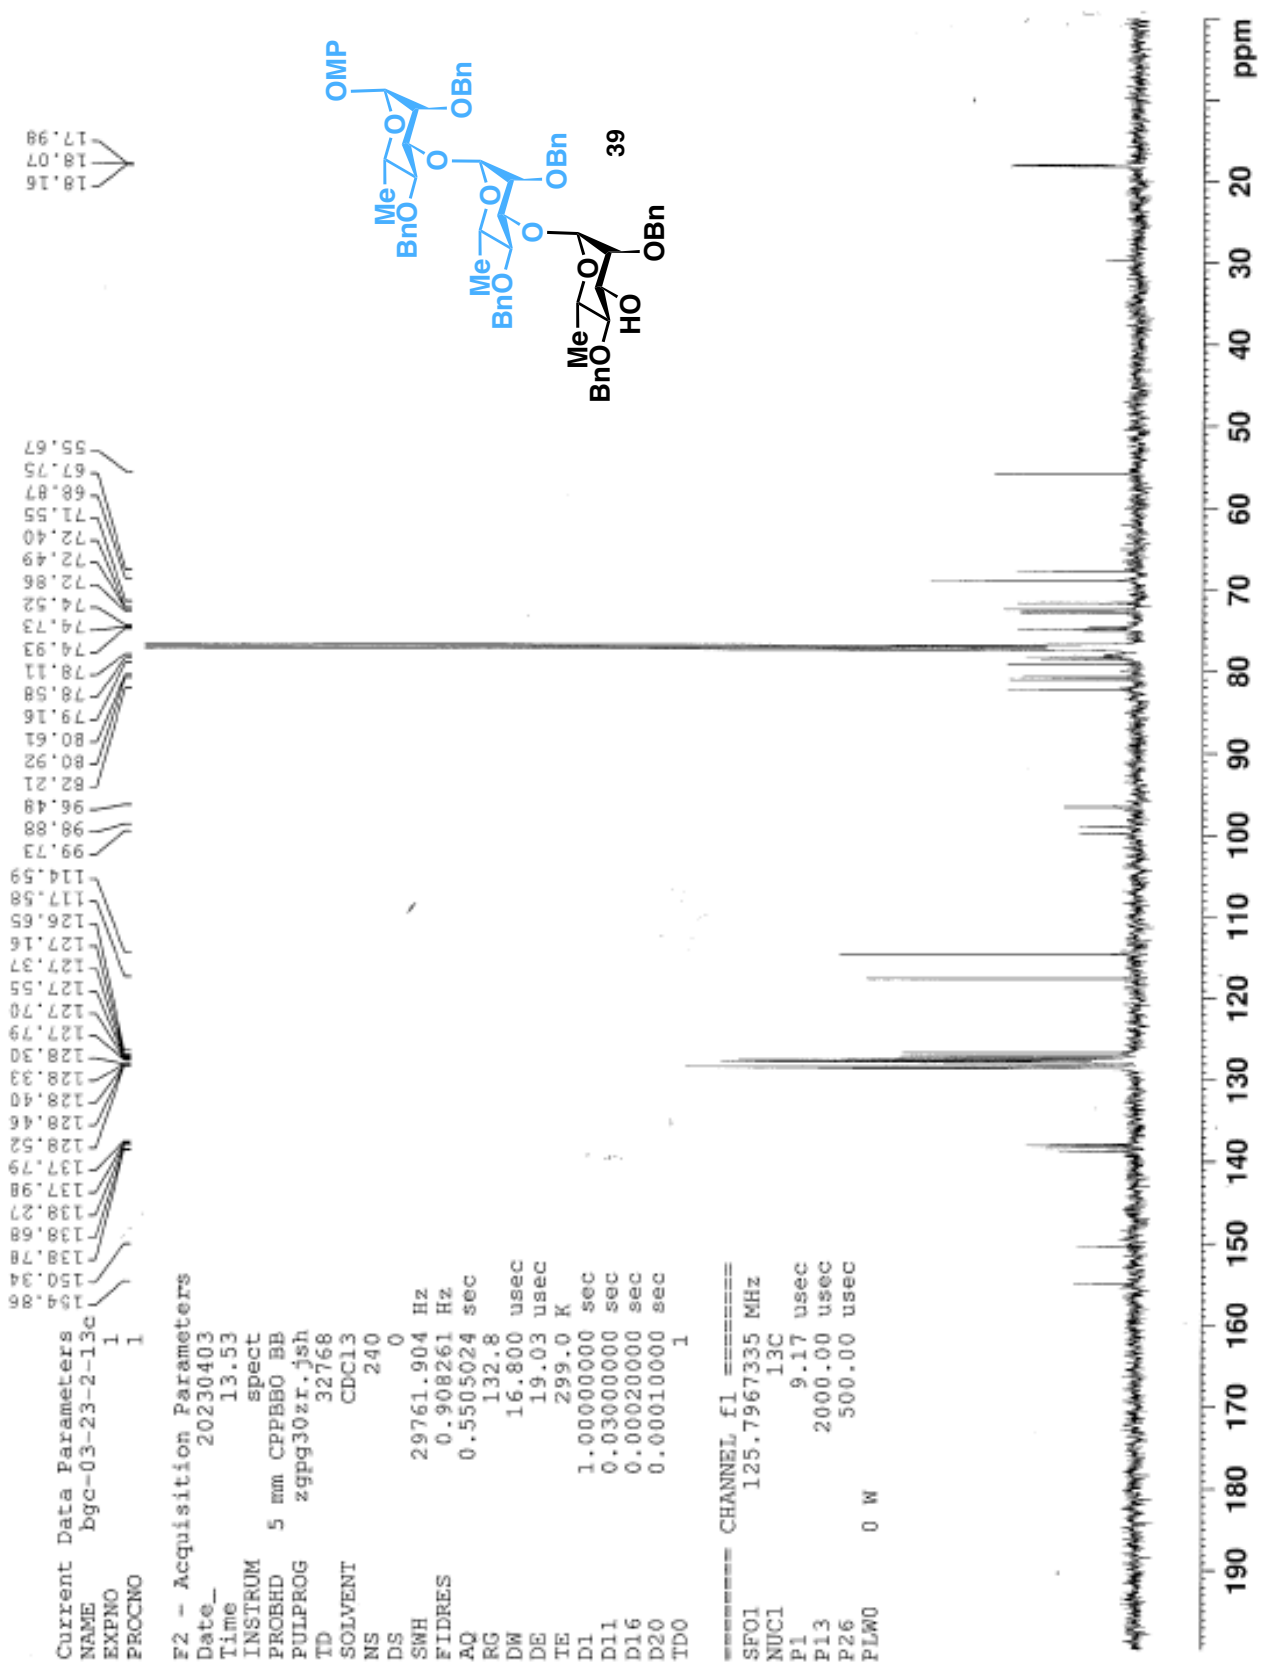

Current Data Parameters  
 NAME bgc-03-23-2-13c  
 EXPNO 1  
 PROCNO 1  
 F2 - Acquisition Parameters  
 Date\_ 20230403  
 Time 13.53  
 INSTRUM spect  
 PROBD 5 mm CFPBBO BB  
 PULPROG zgpg30zr.jsh  
 TD 32768  
 SOLVENT CDC13  
 NS 240  
 DS 0  
 SWH 29761.904 Hz  
 FIDRES 0.908261 Hz  
 AQ 0.5505024 sec  
 RG 132.8  
 DW 16.800 usec  
 DE 19.03 usec  
 TE 299.0 K  
 D1 1.00000000 sec  
 D11 0.03000000 sec  
 D16 0.00020000 sec  
 D20 0.00010000 sec  
 TD0 1  
 ===== CHANNEL f1 =====  
 SF01 125.7967335 MHz  
 NUC1 13C  
 P1 9.17 usec  
 P13 2000.00 usec  
 P26 500.00 usec  
 PLW0 0 W

18.16  
 18.07  
 17.98  
 55.67  
 67.75  
 68.87  
 71.55  
 72.40  
 72.49  
 72.86  
 74.52  
 74.73  
 74.93  
 78.11  
 78.58  
 79.16  
 80.61  
 80.92  
 82.21  
 96.48  
 98.88  
 99.73  
 114.59  
 117.58  
 126.65  
 127.16  
 127.37  
 127.55  
 127.70  
 127.79  
 128.30  
 128.33  
 128.40  
 128.46  
 128.52  
 137.79  
 137.98  
 138.27  
 138.68  
 138.78  
 140.94  
 141.56  
 141.98



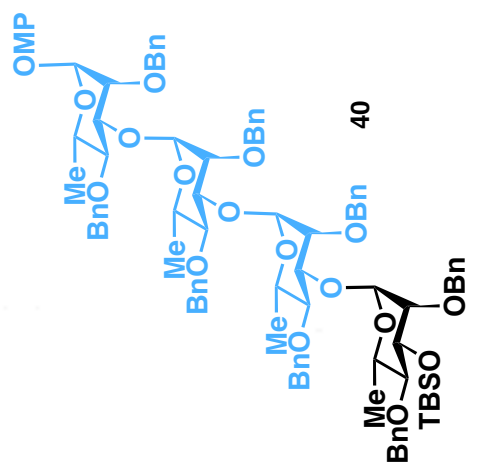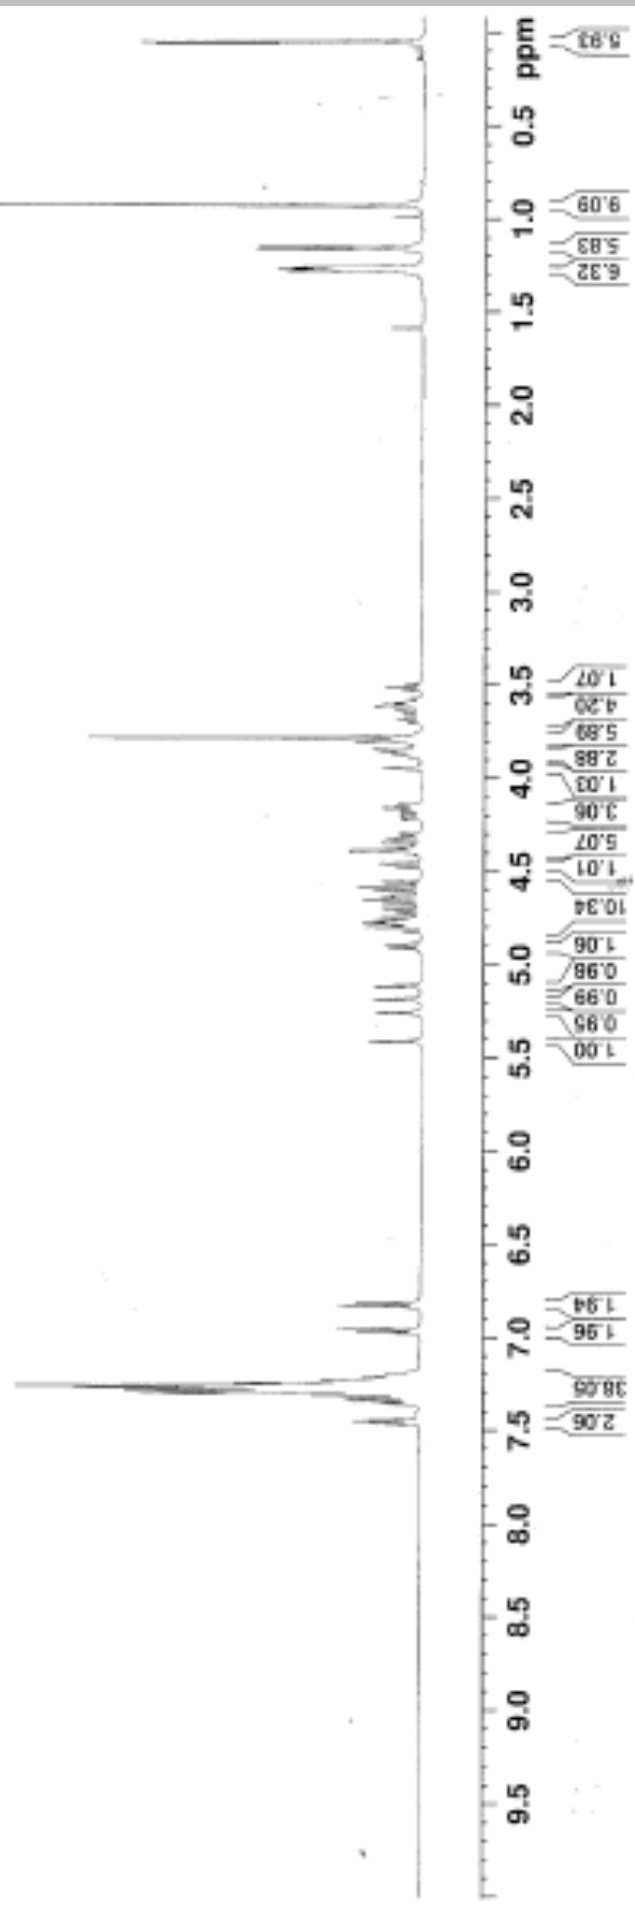

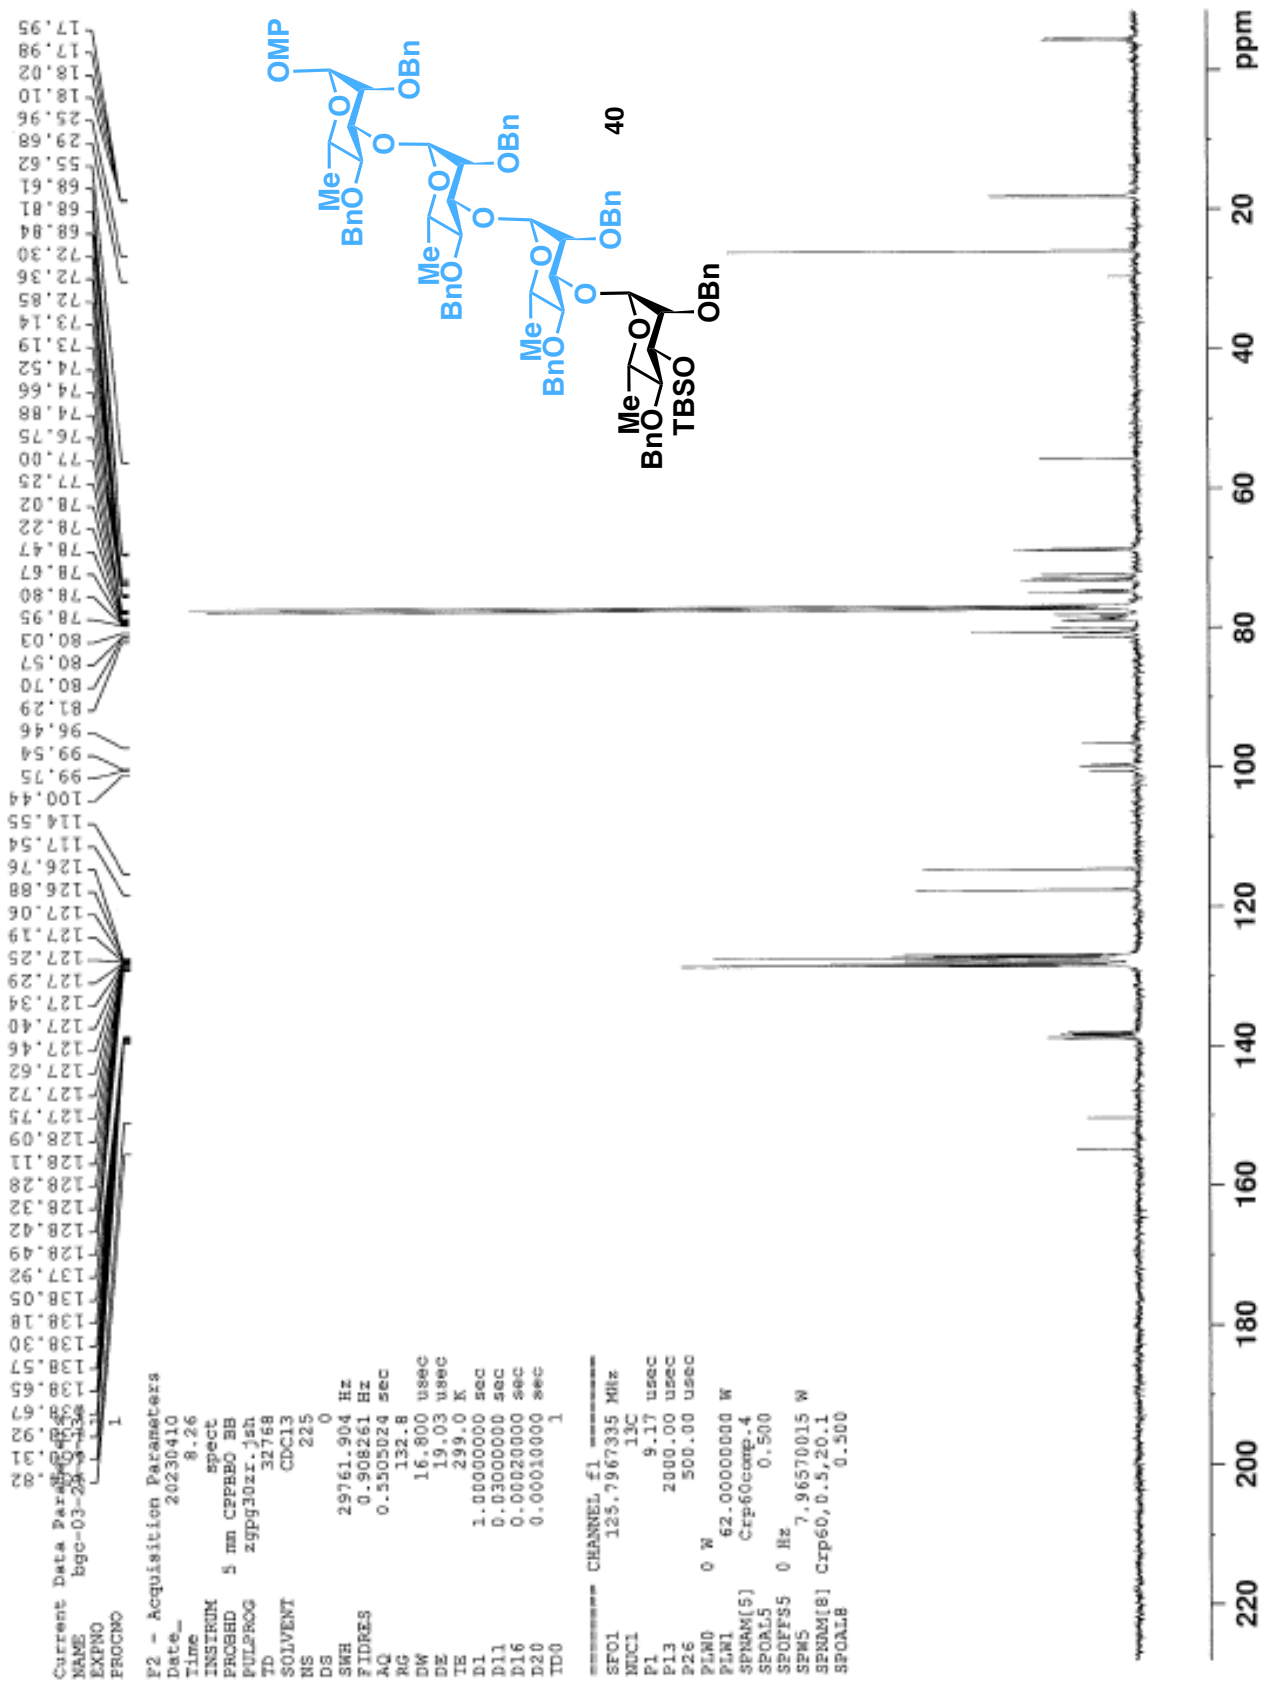

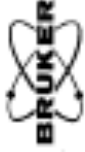

4.99  
4.32

17.99  
18.03  
18.09  
18.15  
28.00

55.67  
58.66  
58.86  
58.89  
58.89  
73.18  
78.01  
78.26  
78.51  
78.72  
78.85  
79.00  
80.01  
80.62  
80.75  
81.34  
96.51  
99.59  
99.79  
100.49  
114.59  
117.59  
126.81  
126.93  
127.11  
127.23  
127.30  
127.34  
127.38  
127.44  
127.50  
127.67  
127.76  
127.80  
128.18  
128.33  
128.37  
128.46  
128.54

Current Data Parameters  
NAME: Jy0-03-29-3-dept  
EXPNO: 1  
PROCNO: 1  
F2 - Acquisition Parameters  
Date\_: 20030416  
Time: 8.32  
INSTRUM: spect  
PROBHD: 5 mm CFFBBO BB  
PULPROG: dept  
ID: 32768  
SOLVENT: CDCl3  
NS: 98  
DS: 0  
SWH: 29761.904 Hz  
FIDRES: 0.988261 Hz  
AQ: 0.5585024 sec  
RG: 332.8  
RW: 16.800 usec  
DSB: 18.00 usec  
TE: 299.0 K  
CMT2: 145.0000000  
CMT12: 1.5000000  
D3: 1.8000000 sec  
D2: 0.00344828 sec  
D12: 0.00002000 sec  
TD: 1

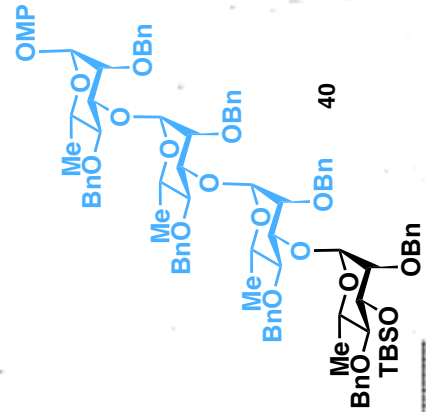

150 140 130 120 110 100 90 80 70 60 50 40 30 20 10 ppm

hs0-03-29-3-hs0g 1 1 /home/local/linm/cen/linm/nmr

|  |  |  |  |
|--|--|--|--|
|  |  |  |  |
|  |  |  |  |
|  |  |  |  |

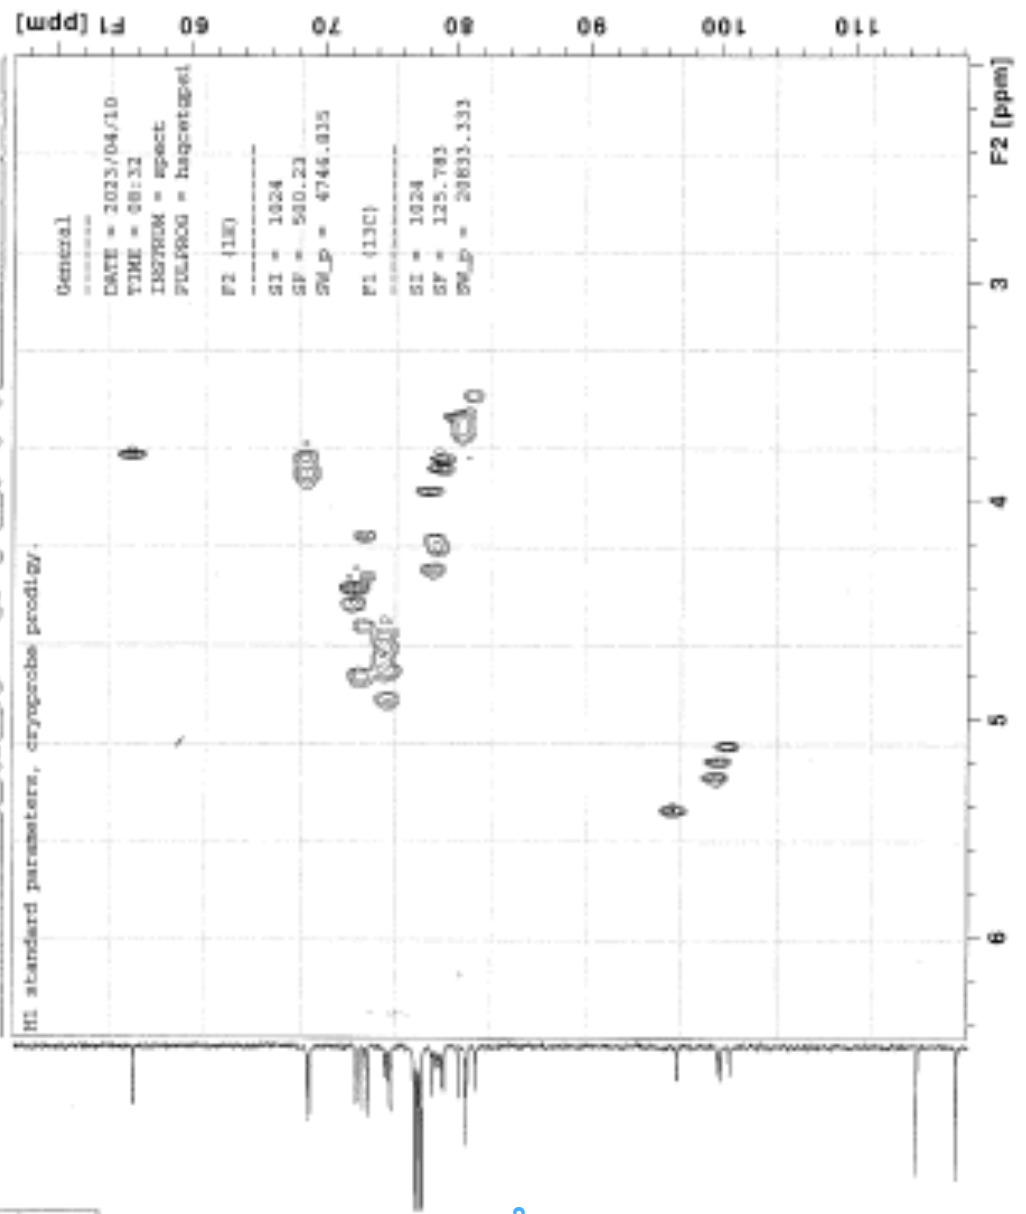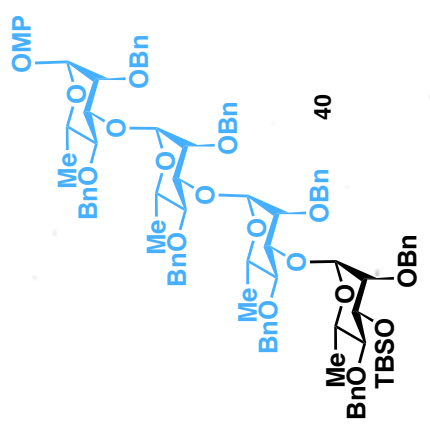

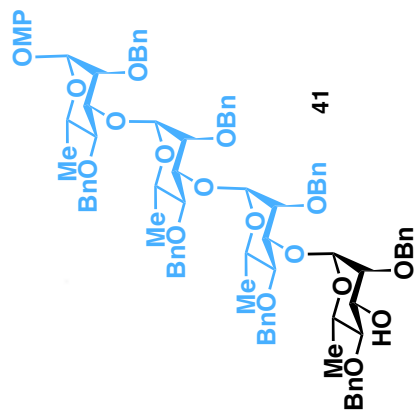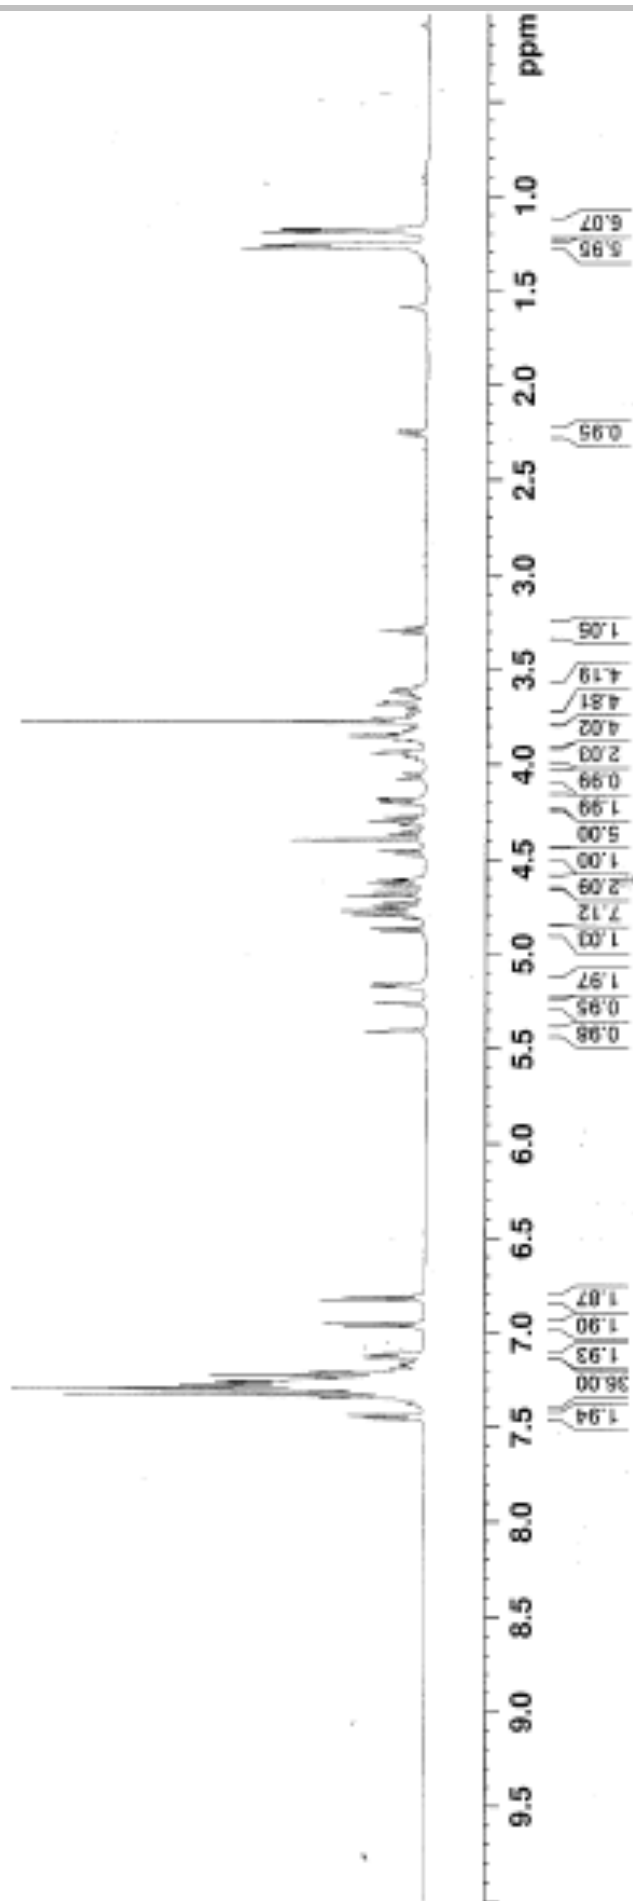

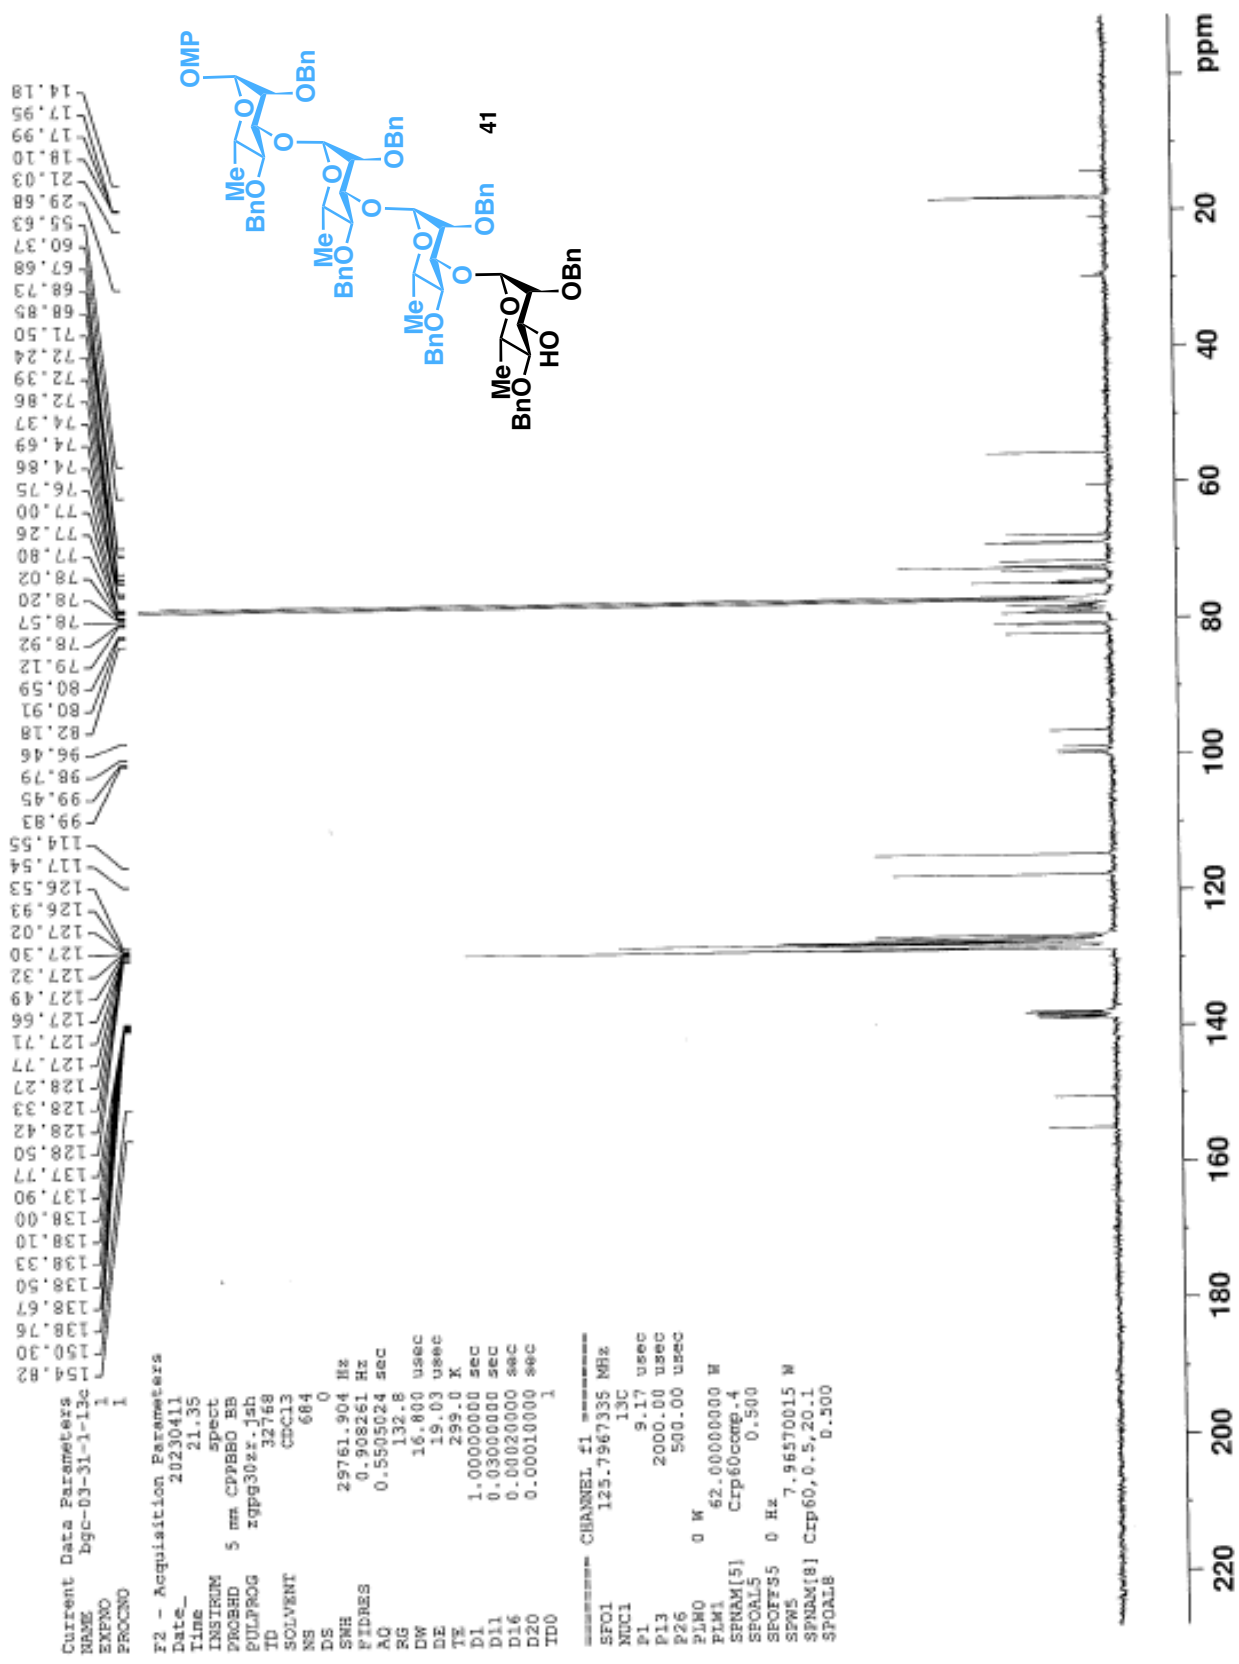

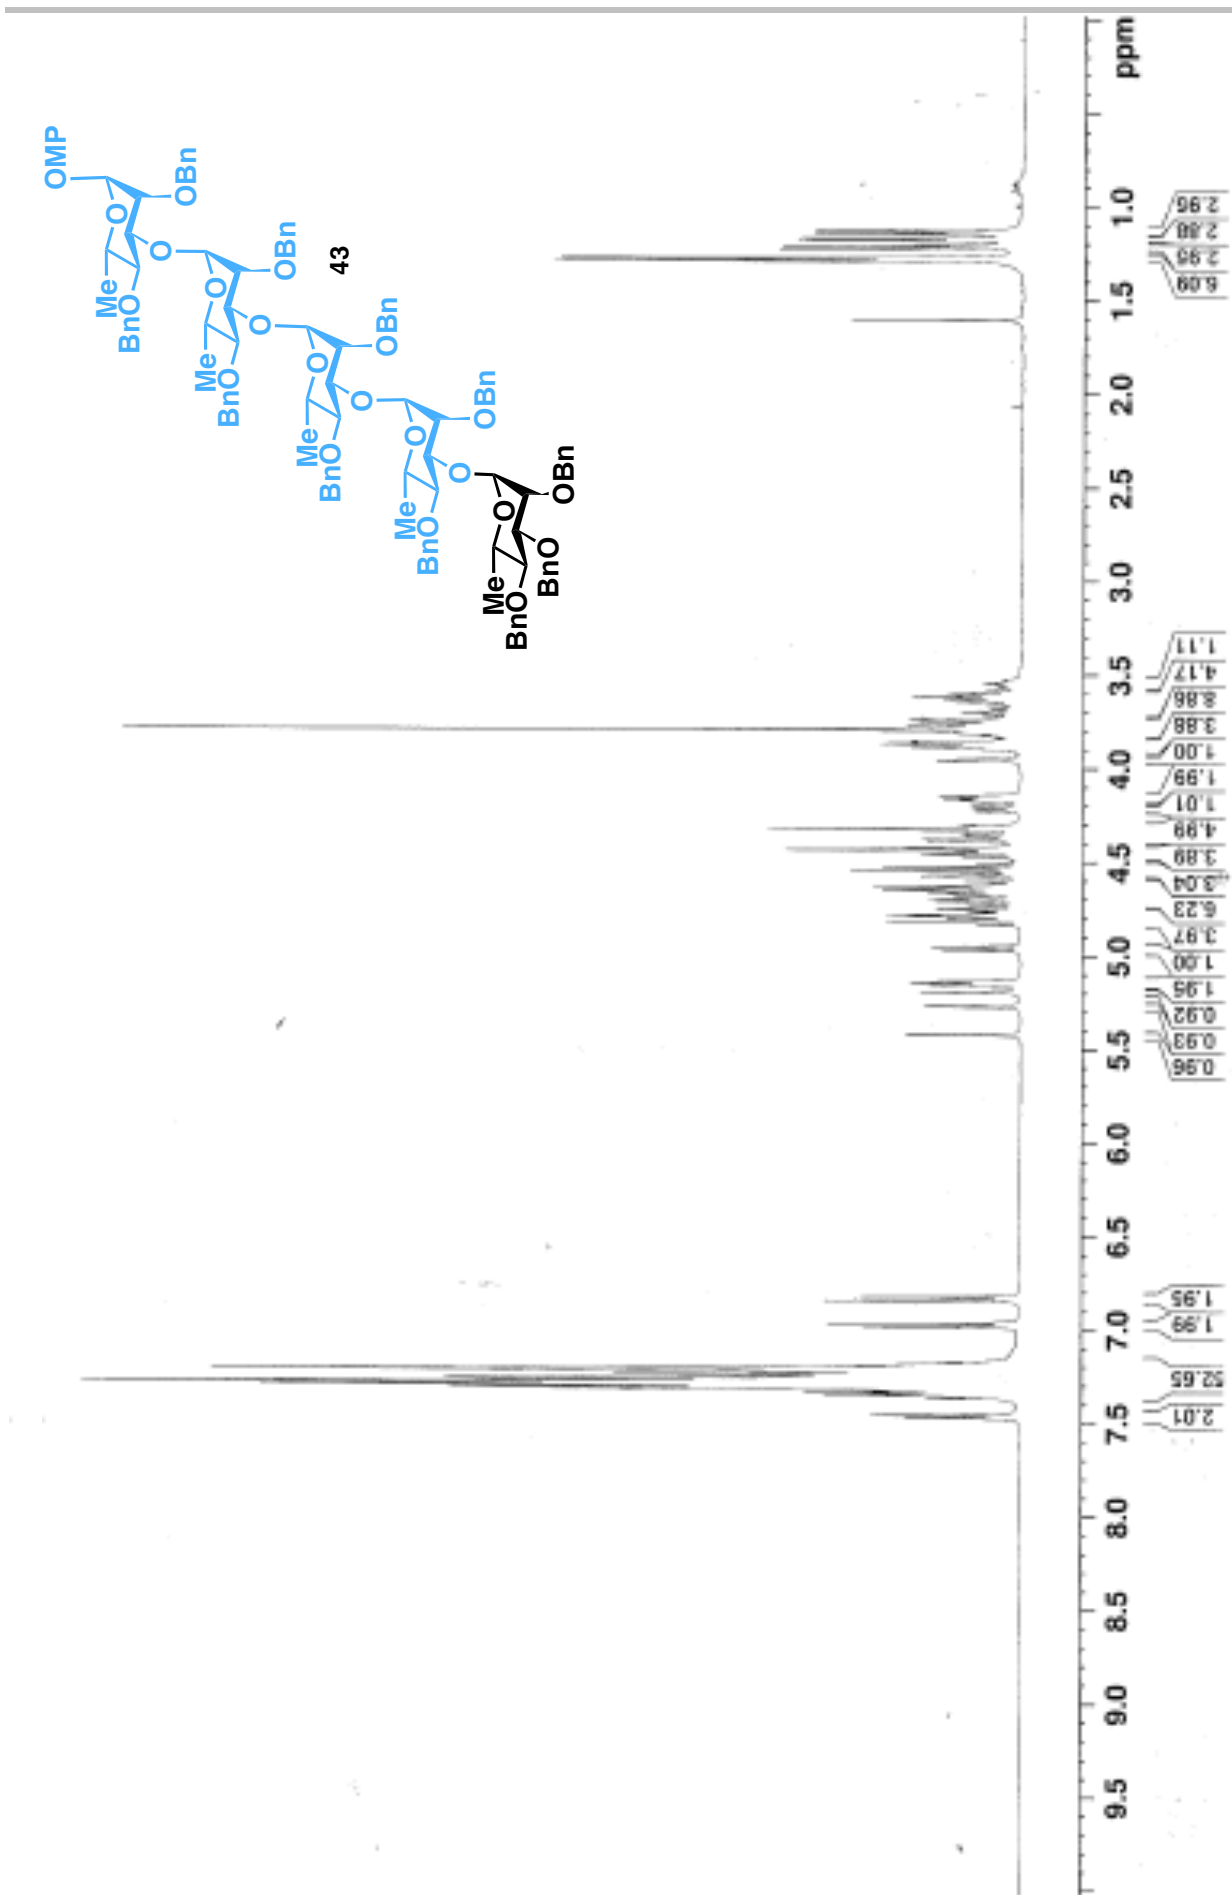

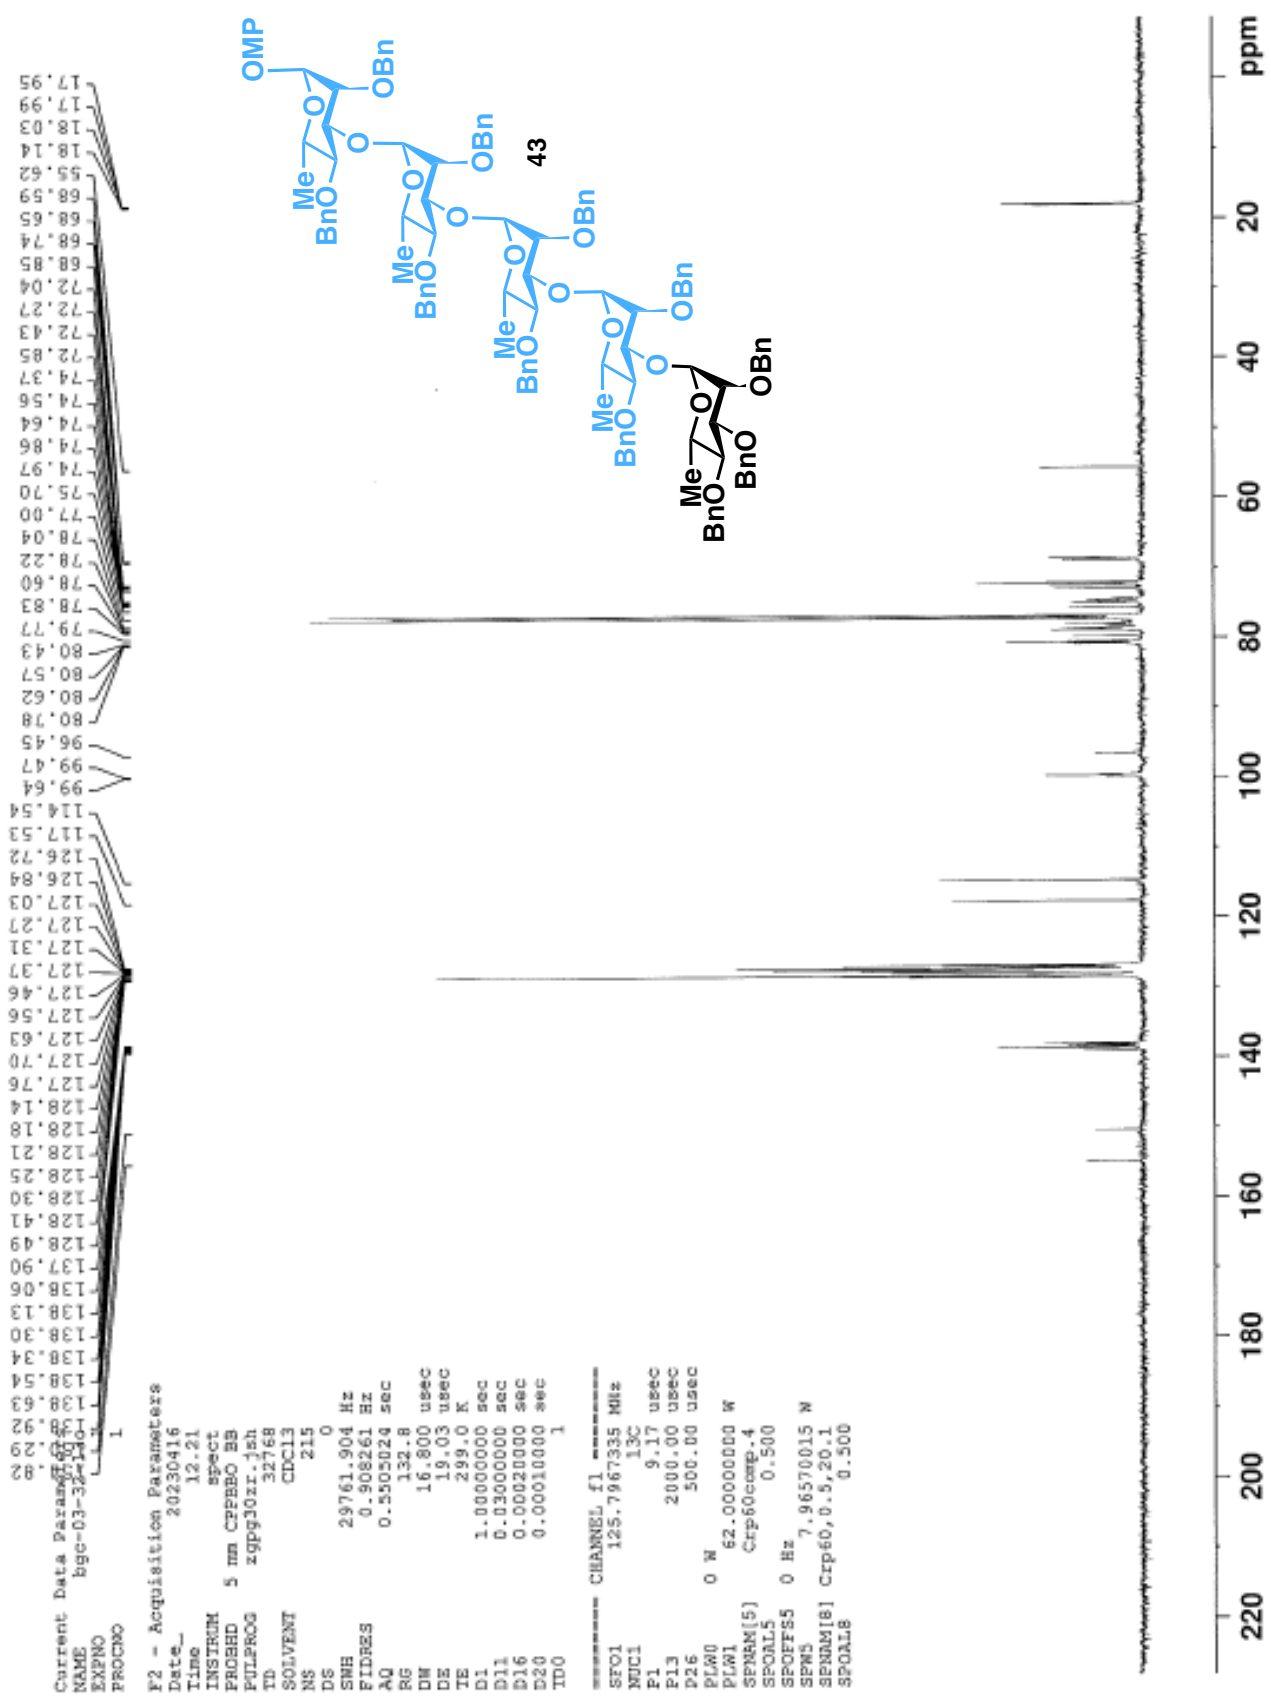



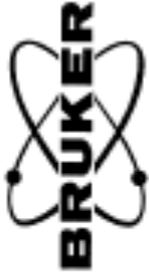

Current Data Parameters  
 NAME: byc-03-32-dept  
 EXPNO: 1  
 PROCNO: 1

F2 - Acquisition Parameters  
 Date\_: 20230416  
 Time: 12.29  
 INSTRUM: spect  
 FOUNDR: 5 mm CPYPRB0 MA  
 PULPROG: zgpg30  
 TD: 32768  
 SOLVENT: CDCl3  
 NS: 133  
 DS: 0  
 SWH: 29761.904 Hz  
 FIDRES: 0.508281 Hz  
 AQ: 0.5505824 sec  
 RG: 132.0  
 DW: 18.000 usec  
 DE: 18.00 usec  
 TE: 299.0 K  
 CDEG1: 145.000000  
 CDEG2: 1.500000  
 D1: 1.0000000 sec  
 D2: 0.5034828 sec  
 D12: 0.3008200 sec  
 TDO: 1

CHANNEL F1  
 SF01: 125.756735 MHz  
 NUC1: 13C  
 P1: 9.17 usec  
 F2: 18.34 usec  
 PLW1: 62.0000000 W

CHANNEL F2  
 SF02: 500.2325000 MHz  
 NUC2: 1H  
 WALTZ16  
 CPDPRG2: waltz16  
 P0: 18.00 usec  
 P3: 12.00 usec  
 P4: 24.00 usec  
 PCPD2: 60.00 usec  
 PLW2: 14.0000000 W  
 PLW12: 0.3150000 W

F2 - Processing parameters  
 SI: 16384  
 SF: 125.782935 MHz  
 WDW: RM  
 SSB: 0  
 LB: 3.00 Hz  
 GB: 0  
 PC: 1.40

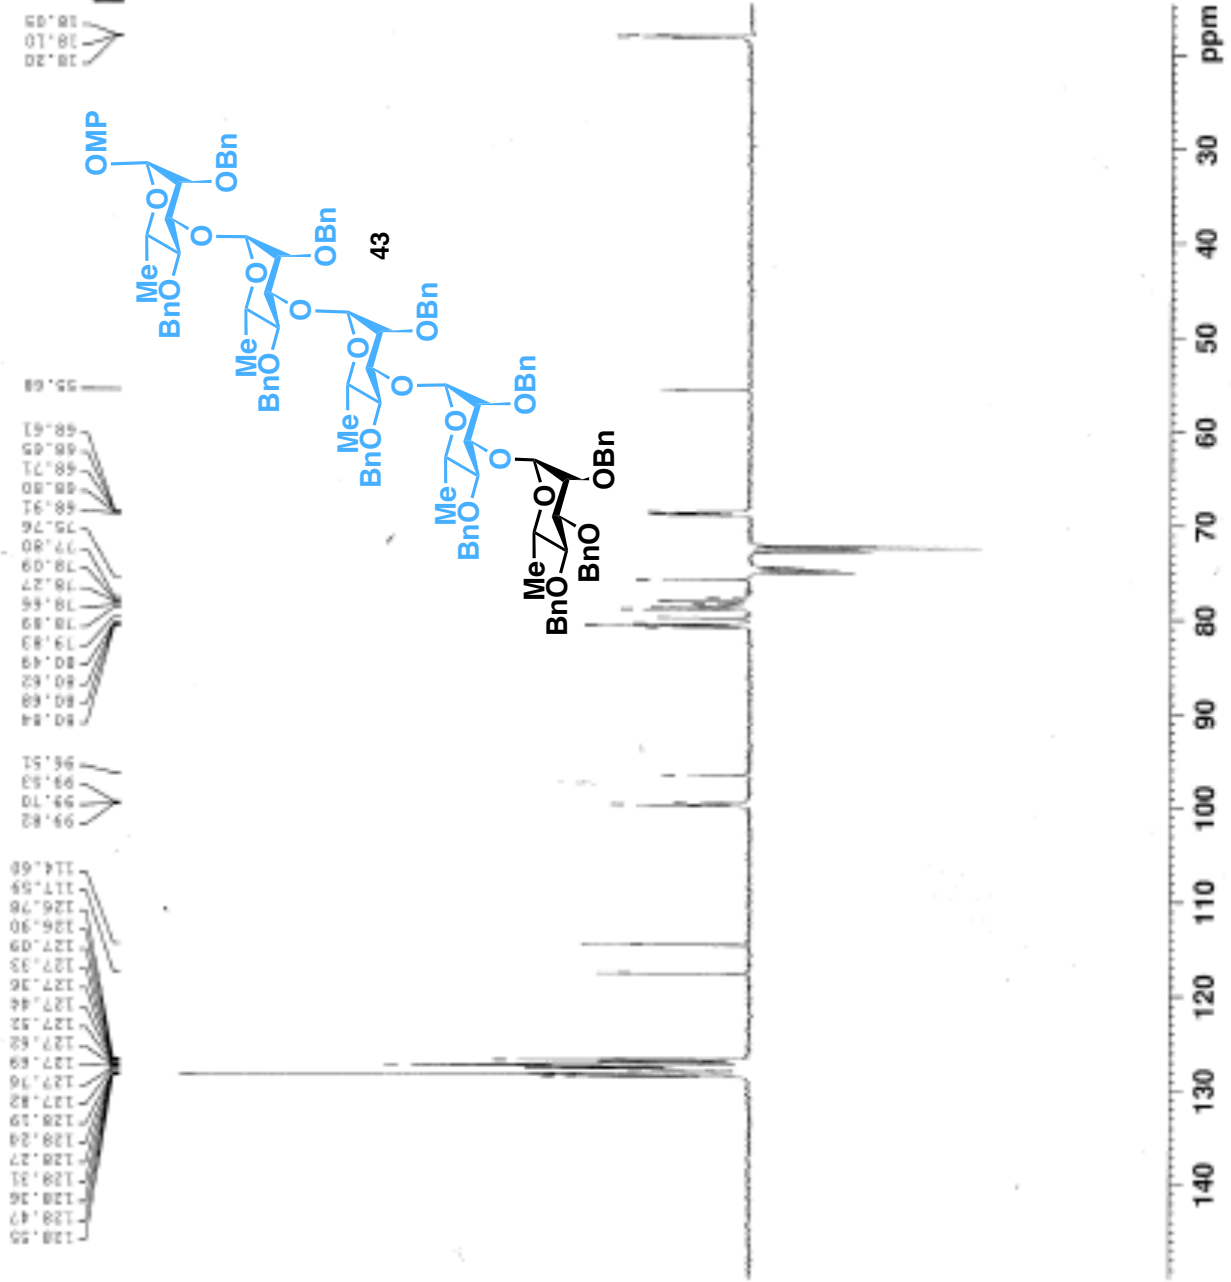

logc-03-32-1sqc 1 1 /home/localimr/cem1.ow/naz

|  |  |  |  |
|--|--|--|--|
|  |  |  |  |
|  |  |  |  |
|  |  |  |  |

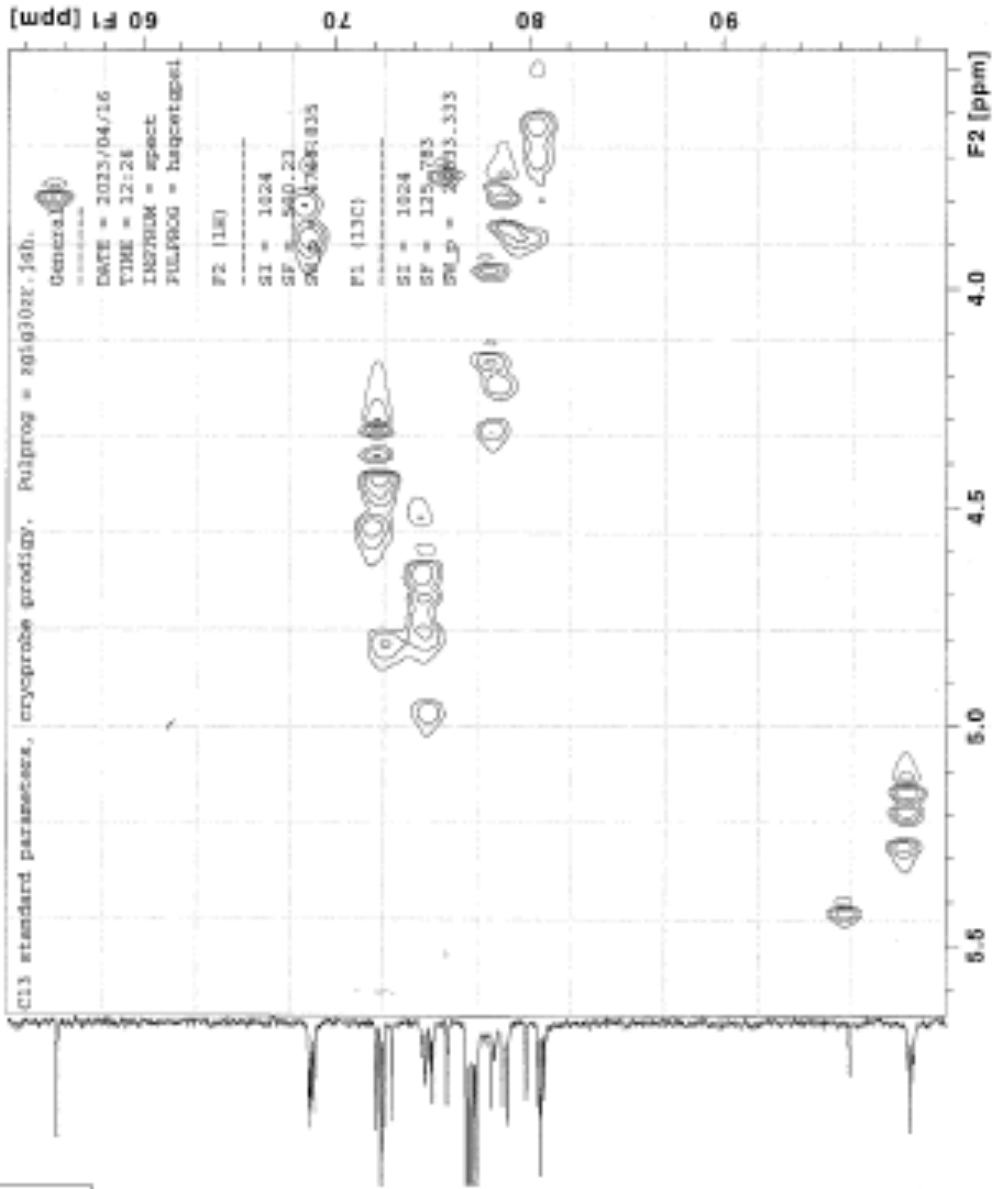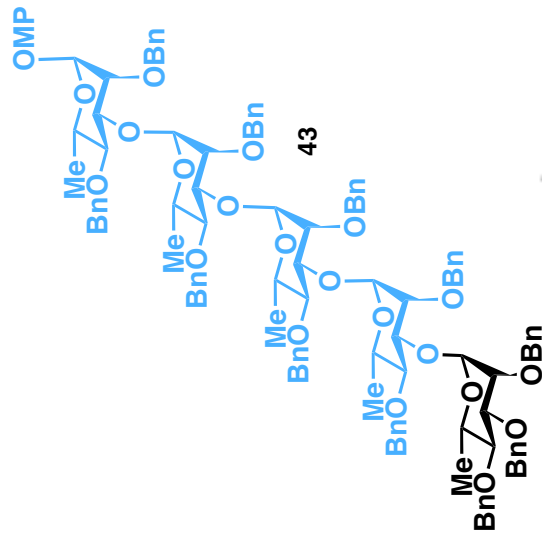

---

## 6. References

- [1] P.R. Verma, P.B. Mukhopadhyay. *Carbohydrate Res.*, **2010**, 345, 432-436.
- [2] P.J. Garegg, T. Nordberg, P. Konradsson, S.C.T. Svensson. *Carbohydrate Res.*, **1983**, 116, 308-311.
